# Supplementary material for: The role of COVID-19 vaccines in preventing post-COVID-19 thromboembolic and cardiovascular complications
Source: HighWire-hosted journal article supplement (doi:10.1136/heartjnl-2023-323483), 2024-03-12

## SUPPLEMENT

The effectiveness of COVID-19 vaccines to prevent post COVID cardiac and thromboembolic complications.

### Table of contents

|                                                                                                                                                                                |    |
|--------------------------------------------------------------------------------------------------------------------------------------------------------------------------------|----|
| <b>Figure S1: Follow-up in vaccinated and unvaccinated cohorts</b> .....                                                                                                       | 6  |
| (A) Main analysis, (B) Follow-up ends at first vaccine dose after index date, (C) Post COVID sequelae refers just to the first outcome after infection.....                    | 6  |
| <b>Figure S2: Study Inclusion Flowchart CPRD AURUM</b> .....                                                                                                                   | 7  |
| <b>Figure S3: Study Inclusion Flowchart CPRD GOLD</b> .....                                                                                                                    | 8  |
| <b>Figure S4: Study Inclusion Flowchart SIDIAP</b> .....                                                                                                                       | 9  |
| <b>Figure S5: Study Inclusion Flowchart CORIVA</b> .....                                                                                                                       | 10 |
| <b>Table S1: Characteristics of unweighted populations in CPRD AURUM, database, stratified by staggered cohort and exposure status. Exposure is any COVID-19 vaccine</b> ..... | 11 |
| <b>Table S2: Characteristics of weighted populations in CPRD AURUM, database, stratified by staggered cohort and exposure status. Exposure is ChAdOx1 vaccine</b> .....        | 13 |
| <b>Table S3: Characteristics of unweighted populations in CPRD AURUM, database, stratified by staggered cohort and exposure status. Exposure is ChAdOx1 vaccine</b> .....      | 15 |
| <b>Table S4: Characteristics of weighted populations in CPRD AURUM, database, stratified by staggered cohort and exposure status. Exposure is BNT162b2 vaccine</b> .....       | 17 |
| <b>Table S5: Characteristics of unweighted populations in CPRD AURUM, database, stratified by staggered cohort and exposure status. Exposure is BNT162b2 vaccine</b> .....     | 19 |
| <b>Table S6: Characteristics of weighted populations in CPRD GOLD, database, stratified by staggered cohort and exposure status. Exposure is any COVID-19 vaccine</b> .....    | 21 |
| <b>Table S7: Characteristics of unweighted populations in CPRD GOLD, database, stratified by staggered cohort and exposure status. Exposure is any COVID-19 vaccine</b> .....  | 23 |
| <b>Table S8: Characteristics of weighted populations in CPRD GOLD, database, stratified by staggered cohort and exposure status. Exposure is ChAdOx1 vaccine</b> .....         | 25 |
| <b>Table S9: Characteristics of unweighted populations in CPRD GOLD, database, stratified by staggered cohort and exposure status. Exposure is ChAdOx1 vaccine</b> .....       | 27 |
| <b>Table S10: Characteristics of weighted populations in CPRD GOLD, database, stratified by staggered cohort and exposure status. Exposure is BNT162b2 vaccine</b> .....       | 29 |
| <b>Table S11: Characteristics of unweighted populations in CPRD GOLD, database, stratified by staggered cohort and exposure status. Exposure is BNT162b2 vaccine</b> .....     | 31 |
| <b>Table S12: Characteristics of weighted populations in SIDIAP, database, stratified by staggered cohort and exposure status. Exposure is any COVID-19 vaccine</b> .....      | 33 |
| <b>Table S13: Characteristics of unweighted populations in SIDIAP, database, stratified by staggered cohort and exposure status. Exposure is any COVID-19 vaccine</b> .....    | 35 |
| <b>Table S14: Characteristics of weighted populations in SIDIAP, database, stratified by staggered cohort and exposure status. Exposure is BNT162b2 vaccine</b> .....          | 37 |
| <b>Table S15: Characteristics of unweighted populations in SIDIAP, database, stratified by staggered cohort and exposure status. Exposure is BNT162b2 vaccine</b> .....        | 39 |
| <b>Table S16: Characteristics of weighted populations in SIDIAP, database, stratified by staggered cohort and exposure status. Exposure is ChAdOx1 vaccine</b> .....           | 41 |

|                                                                                                                                                                                                                                                                                    |     |
|------------------------------------------------------------------------------------------------------------------------------------------------------------------------------------------------------------------------------------------------------------------------------------|-----|
| <b>Table S17: Characteristics of unweighted populations in SIDIAP, database, stratified by staggered cohort and exposure status. Exposure is ChAdOx1 vaccine.</b> .....                                                                                                            | 43  |
| <b>Table S18: Characteristics of weighted populations in CORIVA, database, stratified by staggered cohort and exposure status. Exposure is any COVID-19 vaccine.</b> .....                                                                                                         | 45  |
| <b>Table S19: Characteristics of unweighted populations in CORIVA, database, stratified by staggered cohort and exposure status. Exposure is any COVID-19 vaccine.</b> .....                                                                                                       | 47  |
| <b>Table S20: Characteristics of weighted populations in CORIVA, database, stratified by staggered cohort and exposure status. Exposure is BNT162b2 vaccine.</b> .....                                                                                                             | 49  |
| <b>Table S21: Characteristics of unweighted populations in CORIVA, database, stratified by staggered cohort and exposure status. Exposure is BNT162b2 vaccine.</b> .....                                                                                                           | 51  |
| <b>Table S22: Characteristics of weighted populations in CPRD AURUM database, stratified by staggered cohort and vaccine.</b> .....                                                                                                                                                | 53  |
| <b>Table S23: Characteristics of unweighted populations in CPRD AURUM database, stratified by staggered cohort and vaccine.</b> .....                                                                                                                                              | 55  |
| <b>Table S24: Characteristics of weighted populations in CPRD GOLD database, stratified by staggered cohort and vaccine.</b> .....                                                                                                                                                 | 57  |
| <b>Table S25: Characteristics of unweighted populations in CPRD GOLD database, stratified by staggered cohort and vaccine.</b> .....                                                                                                                                               | 59  |
| <b>Table S26: Number of records (and risk per 10,000 individuals) for post COVID-19 cardiac and thromboembolic complications, across cohorts and databases, stratified by exposure status (any COVID-19 vaccine). Follow-up ends at first vaccine dose after index date.</b> ..... | 61  |
| <b>Table S27: Number of records (and risk per 10,000 individuals) for post COVID-19 cardiac and thromboembolic complications, across cohorts and databases, stratified by exposure status (any COVID-19 vaccine). Only first outcome after COVID-19 captured.</b> .....            | 66  |
| <b>Table S28: Number of records (and risk per 10,000 individuals) for post COVID-19 cardiac and thromboembolic complications, across cohorts and databases, stratified by exposure status (ChAdOx1 vaccine).</b> .....                                                             | 71  |
| <b>Table S29: Number of records (and risk per 10,000 individuals) for post COVID-19 cardiac and thromboembolic complications, across cohorts and databases, stratified by exposure status (ChAdOx1 vaccine). Follow-up ends at first vaccine dose after index date.</b> .....      | 76  |
| <b>Table S30: Number of records (and risk per 10,000 individuals) for post COVID-19 cardiac and thromboembolic complications, across cohorts and databases, stratified by exposure status (ChAdOx1 vaccine). Only first outcome after COVID-19 captured.</b> .....                 | 81  |
| <b>Table S31: Number of records (and risk per 10,000 individuals) for post COVID-19 cardiac and thromboembolic complications, across cohorts and databases, stratified by exposure status (BNT162b2 vaccine).</b> .....                                                            | 86  |
| <b>Table S32: Number of records (and risk per 10,000 individuals) for post COVID-19 cardiac and thromboembolic complications, across cohorts and databases, stratified by exposure status (BNT162b2 vaccine). Follow-up ends at first vaccine dose after index date.</b> .....     | 91  |
| <b>Table S33: Number of records (and risk per 10,000 individuals) for post COVID-19 cardiac and thromboembolic complications, across cohorts and databases, stratified by exposure status (BNT162b2 vaccine). Only first outcome after COVID-19 captured.</b> .....                | 96  |
| <b>Table S34: Number of records (and risk per 10,000 individuals) for post COVID-19 cardiac and thromboembolic complications, across cohorts and databases, stratified by vaccine (BNT162b2 - ChAdOx1).</b> .....                                                                  | 101 |
| <b>Table S35: Number of records (and risk per 10,000 individuals) for post COVID-19 cardiac and thromboembolic complications, across cohorts and databases, stratified by vaccine (BNT162b2 - ChAdOx1). Follow-up ends at first vaccine dose after index date.</b> .....           | 106 |
| <b>Table S36: Number of records (and risk per 10,000 individuals) for post COVID-19 cardiac and thromboembolic complications, across cohorts and databases, stratified by vaccine (BNT162b2 - ChAdOx1). Only first outcome after COVID-19 captured.</b> .....                      | 111 |
| <b>Figure S6: Forest plots for vaccine effect (any COVID-19 vaccine), meta-analysis across cohorts and databases. Follow-up ends at first vaccine dose after index date. Dashed line represents a level of heterogeneity <math>I^2 &gt; 0.4</math>.</b> .....                      | 116 |
| <b>Figure S7: Forest plots for vaccine effect (any COVID-19 vaccine), meta-analysis across cohorts and databases. Only first outcome after COVID-19 captured. Dashed line represents a level of heterogeneity <math>I^2 &gt; 0.4</math>.</b> .....                                 | 117 |
| <b>Figure S8: Forest plots for vaccine effect (ChAdOx1 vaccine), meta-analysis across cohorts and databases. Dashed line represents a level of heterogeneity <math>I^2 &gt; 0.4</math>.</b> .....                                                                                  | 118 |
| <b>Figure S9: Forest plots for vaccine effect (ChAdOx1 vaccine), meta-analysis across cohorts and databases. Follow-up ends at first vaccine dose after index date. Dashed line represents a level of heterogeneity <math>I^2 &gt; 0.4</math>.</b> .....                           | 119 |
| <b>Figure S10: Forest plots for vaccine effect (ChAdOx1 vaccine), meta-analysis across cohorts and databases. Only first outcome after COVID-19 captured. Dashed line represents a level of heterogeneity <math>I^2 &gt; 0.4</math>.</b> .....                                     | 120 |
| <b>Figure S11: Forest plots for vaccine effect (BNT162b2 vaccine), meta-analysis across cohorts and databases. Dashed line represents a level of heterogeneity <math>I^2 &gt; 0.4</math>.</b> .....                                                                                | 121 |

|                                                                                                                                                                                                                                                                                                                                                                       |     |
|-----------------------------------------------------------------------------------------------------------------------------------------------------------------------------------------------------------------------------------------------------------------------------------------------------------------------------------------------------------------------|-----|
| <b>Figure S12: Forest plots for vaccine effect (BNT162b2 vaccine), meta-analysis across cohorts and databases. Follow-up ends at first vaccine dose after index date. Dashed line represents a level of heterogeneity <math>I^2 &gt; 0.4</math>.</b>                                                                                                                  | 122 |
| <b>Figure S13: Forest plots for vaccine effect (BNT162b2 vaccine), meta-analysis across cohorts and databases. Only first outcome after COVID-19 captured. Dashed line represents a level of heterogeneity <math>I^2 &gt; 0.4</math>.</b>                                                                                                                             | 123 |
| <b>Figure S14: Forest plots for vaccine effect (any COVID-19 vaccine) on preventing venous thromboembolism complications, for each cohort and database (meta-analysis estimates across cohorts in the last panel). Dashed line represents a level of heterogeneity <math>I^2 &gt; 0.4</math>.</b>                                                                     | 124 |
| <b>Figure S15: Forest plots for vaccine effect (any COVID-19 vaccine) on preventing venous thromboembolism complications, for each cohort and database (meta-analysis estimates across cohorts in the last panel). Follow-up ends at first vaccine dose after index date. Dashed line represents a level of heterogeneity <math>I^2 &gt; 0.4</math>.</b>              | 125 |
| <b>Figure S16: Forest plots for vaccine effect (any COVID-19 vaccine) on preventing venous thromboembolism complications, for each cohort and database (meta-analysis estimates across cohorts in the last panel). Only first outcome after COVID-19 captured. Dashed line represents a level of heterogeneity <math>I^2 &gt; 0.4</math>.</b>                         | 126 |
| <b>Figure S17: Forest plots for vaccine effect (ChAdOx1 vaccine) on preventing venous thromboembolism complications, for each cohort and database (meta-analysis estimates across cohorts in the last panel). Dashed line represents a level of heterogeneity <math>I^2 &gt; 0.4</math>.</b>                                                                          | 127 |
| <b>Figure S18: Forest plots for vaccine effect (ChAdOx1 vaccine) on preventing venous thromboembolism complications, for each cohort and database (meta-analysis estimates across cohorts in the last panel). Follow-up ends at first vaccine dose after index date. Dashed line represents a level of heterogeneity <math>I^2 &gt; 0.4</math>.</b>                   | 128 |
| <b>Figure S19: Forest plots for vaccine effect (ChAdOx1 vaccine) on preventing venous thromboembolism complications, for each cohort and database (meta-analysis estimates across cohorts in the last panel). Only first outcome after COVID-19 captured. Dashed line represents a level of heterogeneity <math>I^2 &gt; 0.4</math>.</b>                              | 129 |
| <b>Figure S20: Forest plots for vaccine effect (BNT162b2 vaccine) on preventing venous thromboembolism complications, for each cohort and database (meta-analysis estimates across cohorts in the last panel). Dashed line represents a level of heterogeneity <math>I^2 &gt; 0.4</math>.</b>                                                                         | 130 |
| <b>Figure S21: Forest plots for vaccine effect (BNT162b2 vaccine) on preventing venous thromboembolism complications, for each cohort and database (meta-analysis estimates across cohorts in the last panel). Follow-up ends at first vaccine dose after index date. Dashed line represents a level of heterogeneity <math>I^2 &gt; 0.4</math>.</b>                  | 131 |
| <b>Figure S22: Forest plots for vaccine effect (BNT162b2 vaccine) on preventing venous thromboembolism complications, for each cohort and database (meta-analysis estimates across cohorts in the last panel). Only first outcome after COVID-19 captured. Dashed line represents a level of heterogeneity <math>I^2 &gt; 0.4</math>.</b>                             | 132 |
| <b>Figure S23: Forest plots for vaccine effect (any COVID-19 vaccine) on preventing arterial thrombosis/thromboembolism complications, for each cohort and database (meta-analysis estimates across cohorts in the last panel). Dashed line represents a level of heterogeneity <math>I^2 &gt; 0.4</math>.</b>                                                        | 133 |
| <b>Figure S24: Forest plots for vaccine effect (any COVID-19 vaccine) on preventing arterial thrombosis/thromboembolism complications, for each cohort and database (meta-analysis estimates across cohorts in the last panel). Follow-up ends at first vaccine dose after index date. Dashed line represents a level of heterogeneity <math>I^2 &gt; 0.4</math>.</b> | 134 |
| <b>Figure S25: Forest plots for vaccine effect (any COVID-19 vaccine) on preventing arterial thrombosis/thromboembolism complications, for each cohort and database (meta-analysis estimates across cohorts in the last panel). Only first outcome after COVID-19 captured. Dashed line represents a level of heterogeneity <math>I^2 &gt; 0.4</math>.</b>            | 135 |
| <b>Figure S26: Forest plots for vaccine effect (ChAdOx1 vaccine) on preventing arterial thrombosis/thromboembolism complications, for each cohort and database (meta-analysis estimates across cohorts in the last panel). Dashed line represents a level of heterogeneity <math>I^2 &gt; 0.4</math>.</b>                                                             | 136 |
| <b>Figure S27: Forest plots for vaccine effect (ChAdOx1 vaccine) on preventing arterial thrombosis/thromboembolism complications, for each cohort and database (meta-analysis estimates across cohorts in the last panel). Follow-up ends at first vaccine dose after index date. Dashed line represents a level of heterogeneity <math>I^2 &gt; 0.4</math>.</b>      | 137 |
| <b>Figure S28: Forest plots for vaccine effect (ChAdOx1 vaccine) on preventing arterial thrombosis/thromboembolism complications, for each cohort and database (meta-analysis estimates across cohorts in the last panel). Only first outcome after COVID-19 captured. Dashed line represents a level of heterogeneity <math>I^2 &gt; 0.4</math>.</b>                 | 138 |

|                                                                                                                                                                                                                                                                                                                                                       |     |
|-------------------------------------------------------------------------------------------------------------------------------------------------------------------------------------------------------------------------------------------------------------------------------------------------------------------------------------------------------|-----|
| <b>Figure S29: Forest plots for vaccine effect (BNT162b2 vaccine) on preventing arterial thrombosis/thromboembolism complications</b> , for each cohort and database (meta-analysis estimates across cohorts in the last panel). Dashed line represents a level of heterogeneity $I^2 > 0.4$ .                                                        | 139 |
| <b>Figure S30: Forest plots for vaccine effect (BNT162b2 vaccine) on preventing arterial thrombosis/thromboembolism complications</b> , for each cohort and database (meta-analysis estimates across cohorts in the last panel). Follow-up ends at first vaccine dose after index date. Dashed line represents a level of heterogeneity $I^2 > 0.4$ . | 140 |
| <b>Figure S31: Forest plots for vaccine effect (BNT162b2 vaccine) on preventing arterial thrombosis/thromboembolism complications</b> , for each cohort and database (meta-analysis estimates across cohorts in the last panel). Only first outcome after COVID-19 captured. Dashed line represents a level of heterogeneity $I^2 > 0.4$ .            | 141 |
| <b>Figure S32: Forest plots for vaccine effect (any COVID-19 vaccine) on preventing cardiac diseases and hemorrhagic stroke</b> , for each cohort and database (meta-analysis estimates across cohorts in the last panel). Dashed line represents a level of heterogeneity $I^2 > 0.4$ .                                                              | 142 |
| <b>Figure S33: Forest plots for vaccine effect (any COVID-19 vaccine) on preventing cardiac diseases and hemorrhagic stroke</b> , for each cohort and database (meta-analysis estimates across cohorts in the last panel). Follow-up ends at first vaccine dose after index date. Dashed line represents a level of heterogeneity $I^2 > 0.4$ .       | 143 |
| <b>Figure S34: Forest plots for vaccine effect (any COVID-19 vaccine) on preventing cardiac diseases and hemorrhagic stroke</b> , for each cohort and database (meta-analysis estimates across cohorts in the last panel). Only first outcome after COVID-19 captured. Dashed line represents a level of heterogeneity $I^2 > 0.4$ .                  | 144 |
| <b>Figure S35: Forest plots for vaccine effect (ChAdOx1 vaccine) on preventing cardiac diseases and hemorrhagic stroke</b> , for each cohort and database (meta-analysis estimates across cohorts in the last panel). Dashed line represents a level of heterogeneity $I^2 > 0.4$ .                                                                   | 145 |
| <b>Figure S36: Forest plots for vaccine effect (ChAdOx1 vaccine) on preventing cardiac diseases and hemorrhagic stroke</b> , for each cohort and database (meta-analysis estimates across cohorts in the last panel). Follow-up ends at first vaccine dose after index date. Dashed line represents a level of heterogeneity $I^2 > 0.4$ .            | 146 |
| <b>Figure S37: Forest plots for vaccine effect (ChAdOx1 vaccine) on preventing cardiac diseases and hemorrhagic stroke</b> , for each cohort and database (meta-analysis estimates across cohorts in the last panel). Only first outcome after COVID-19 captured. Dashed line represents a level of heterogeneity $I^2 > 0.4$ .                       | 147 |
| <b>Figure S38: Forest plots for vaccine effect (BNT162b2 vaccine) on preventing cardiac diseases and hemorrhagic stroke</b> , for each cohort and database (meta-analysis estimates across cohorts in the last panel). Dashed line represents a level of heterogeneity $I^2 > 0.4$ .                                                                  | 148 |
| <b>Figure S39: Forest plots for vaccine effect (BNT162b2 vaccine) on preventing cardiac diseases and hemorrhagic stroke</b> , for each cohort and database (meta-analysis estimates across cohorts in the last panel). Follow-up ends at first vaccine dose after index date. Dashed line represents a level of heterogeneity $I^2 > 0.4$ .           | 149 |
| <b>Figure S40: Forest plots for vaccine effect (BNT162b2 vaccine) on preventing cardiac diseases and hemorrhagic stroke</b> , for each cohort and database (meta-analysis estimates across cohorts in the last panel). Only first outcome after COVID-19 captured. Dashed line represents a level of heterogeneity $I^2 > 0.4$ .                      | 150 |
| <b>Figure S41: Forest plots for comparative effect</b> , meta-analysis across cohorts and databases. Follow-up ends at first vaccine dose after index date. Dashed line represents a level of heterogeneity $I^2 > 0.4$ .                                                                                                                             | 151 |
| <b>Figure S42: Forest plots for comparative effect</b> , meta-analysis across cohorts and databases. Only first outcome after COVID-19 captured. Dashed line represents a level of heterogeneity $I^2 > 0.4$ .                                                                                                                                        | 152 |
| <b>Figure S43: Forest plots for comparative effect on preventing venous thromboembolism complications</b> , for each cohort and database (meta-analysis estimates across cohorts in the last panel). Dashed line represents a level of heterogeneity $I^2 > 0.4$ .                                                                                    | 153 |
| <b>Figure S44: Forest plots for comparative effect on preventing venous thromboembolism complications</b> , for each cohort and database (meta-analysis estimates across cohorts in the last panel). Follow-up ends at first vaccine dose after index date. Dashed line represents a level of heterogeneity $I^2 > 0.4$ .                             | 154 |
| <b>Figure S45: Forest plots for comparative effect on preventing venous thromboembolism complications</b> , for each cohort and database (meta-analysis estimates across cohorts in the last panel). Only first outcome after COVID-19 captured. Dashed line represents a level of heterogeneity $I^2 > 0.4$ .                                        | 155 |
| <b>Figure S46: Forest plots for comparative effect on preventing arterial thrombosis/thromboembolism complications</b> , for each cohort and database (meta-analysis estimates across cohorts in the last panel). Dashed line represents a level of heterogeneity $I^2 > 0.4$ .                                                                       | 156 |

|                                                                                                                                                                                                                                                                                                                                            |     |
|--------------------------------------------------------------------------------------------------------------------------------------------------------------------------------------------------------------------------------------------------------------------------------------------------------------------------------------------|-----|
| <b>Figure S47: Forest plots for comparative effect on preventing arterial thrombosis/thromboembolism complications</b> , for each cohort and database (meta-analysis estimates across cohorts in the last panel). Follow-up ends at first vaccine dose after index date. Dashed line represents a level of heterogeneity $I^2 > 0.4$ ..... | 157 |
| <b>Figure S48: Forest plots for comparative effect on preventing arterial thrombosis/thromboembolism complications</b> , for each cohort and database (meta-analysis estimates across cohorts in the last panel). Only first outcome after COVID-19 captured. Dashed line represents a level of heterogeneity $I^2 > 0.4$ .....            | 158 |
| <b>Figure S49: Forest plots for comparative effect on preventing cardiac diseases and hemorrhagic stroke</b> , for each cohort and database (meta-analysis estimates across cohorts in the last panel). Dashed line represents a level of heterogeneity $I^2 > 0.4$ .....                                                                  | 159 |
| <b>Figure S50: Forest plots for comparative effect on preventing cardiac diseases and hemorrhagic stroke</b> , for each cohort and database (meta-analysis estimates across cohorts in the last panel). Follow-up ends at first vaccine dose after index date. Dashed line represents a level of heterogeneity $I^2 > 0.4$ .....           | 160 |
| <b>Figure S51: Forest plots for comparative effect on preventing cardiac diseases and hemorrhagic stroke</b> , for each cohort and database (meta-analysis estimates across cohorts in the last panel). Only first outcome after COVID-19 captured. Dashed line represents a level of heterogeneity $I^2 > 0.4$ .....                      | 161 |

**Figure S1: Follow-up in vaccinated and unvaccinated cohorts.**

(A) Main analysis, (B) Follow-up ends at first vaccine dose after index date, (C) Post COVID sequelae refers just to the first outcome after infection.

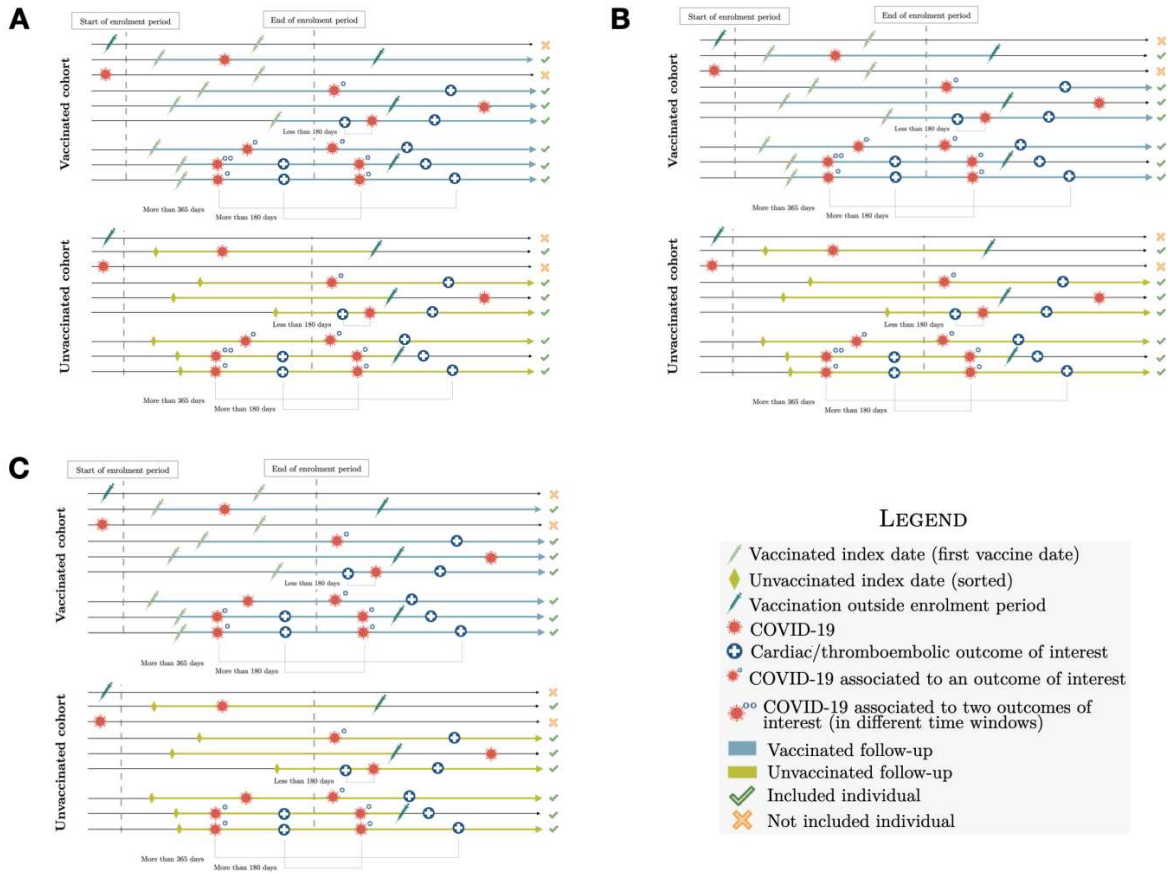

Figure S2: Study Inclusion Flowchart CPRD AURUM

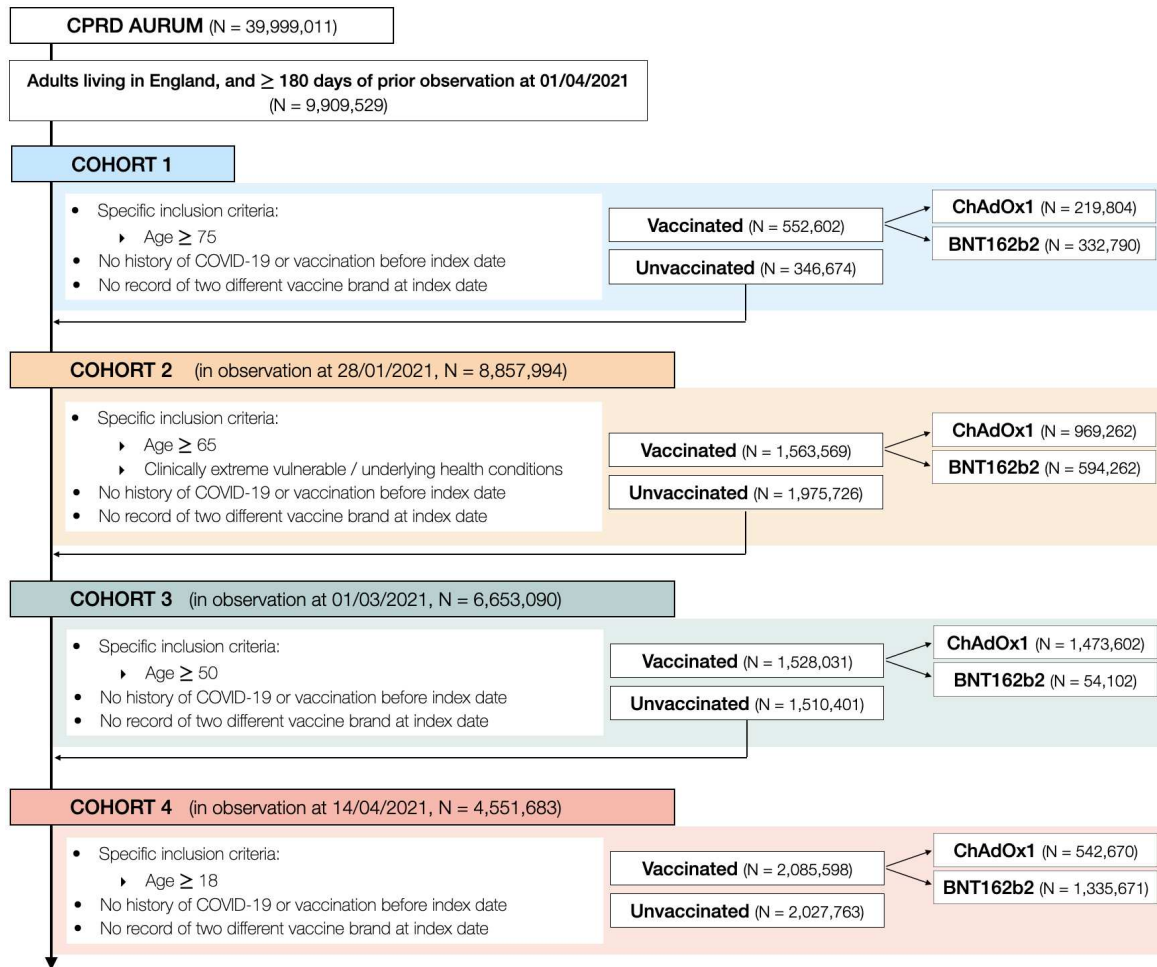

Figure S3: Study Inclusion Flowchart CPRD GOLD.

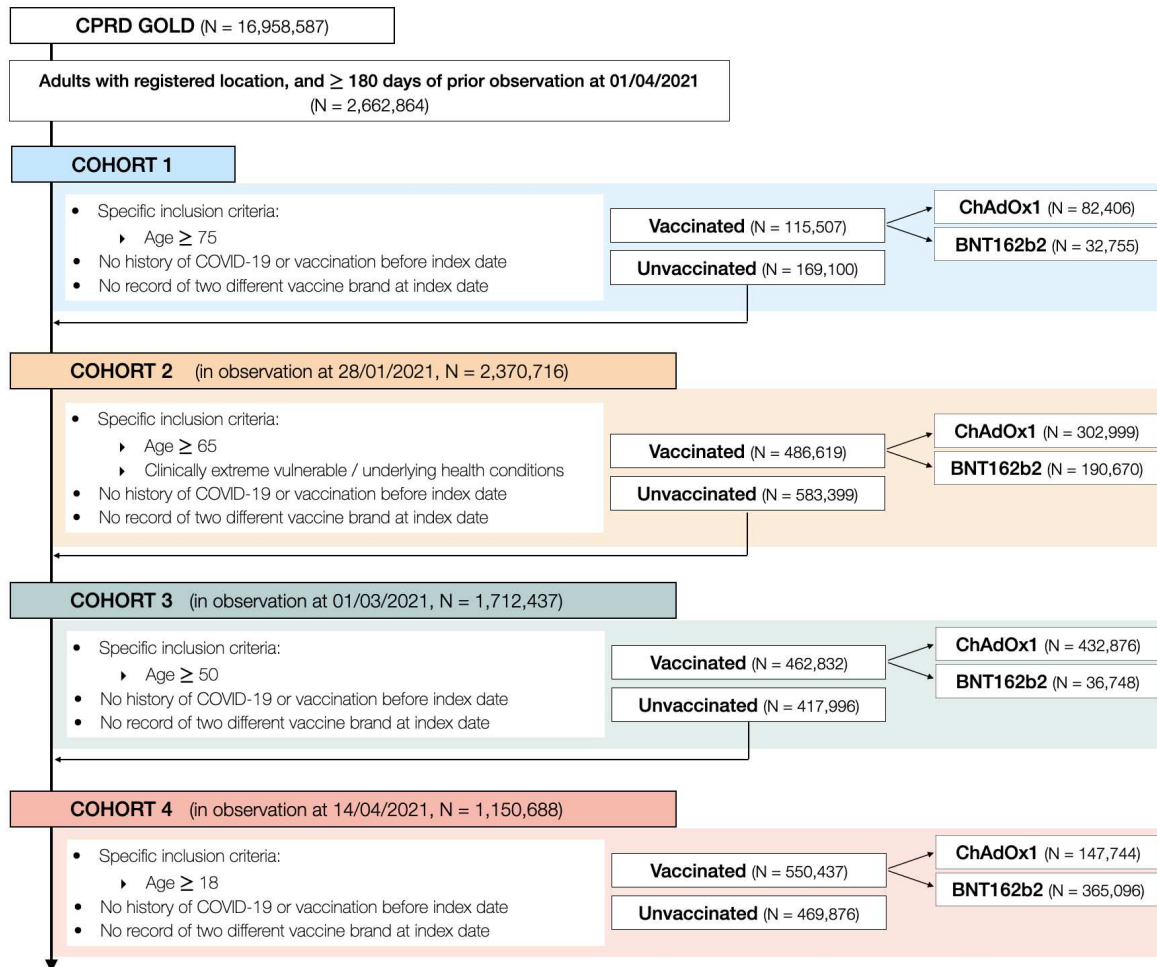



Figure S4: Study Inclusion Flowchart SIDIAP.

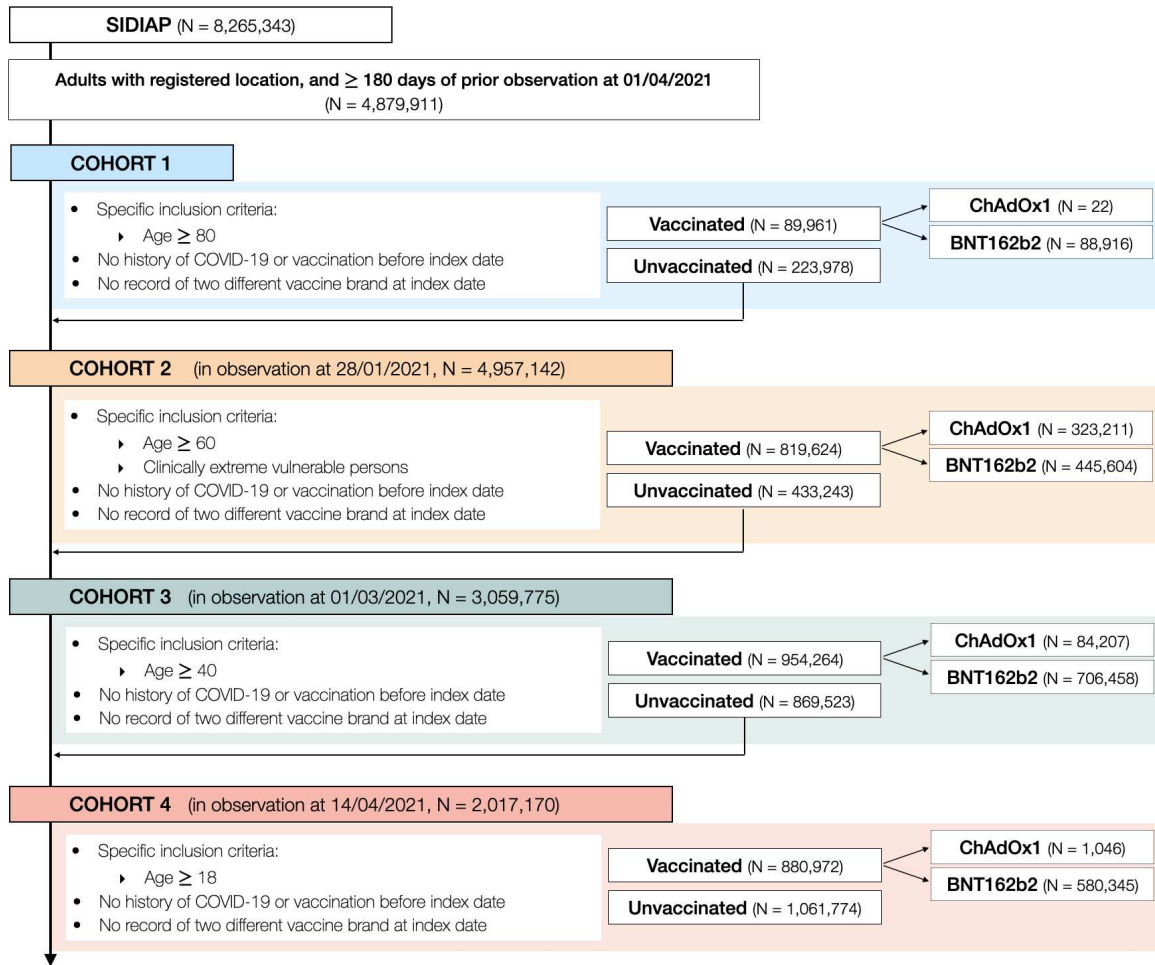

Figure S5: Study Inclusion Flowchart CORIVA.

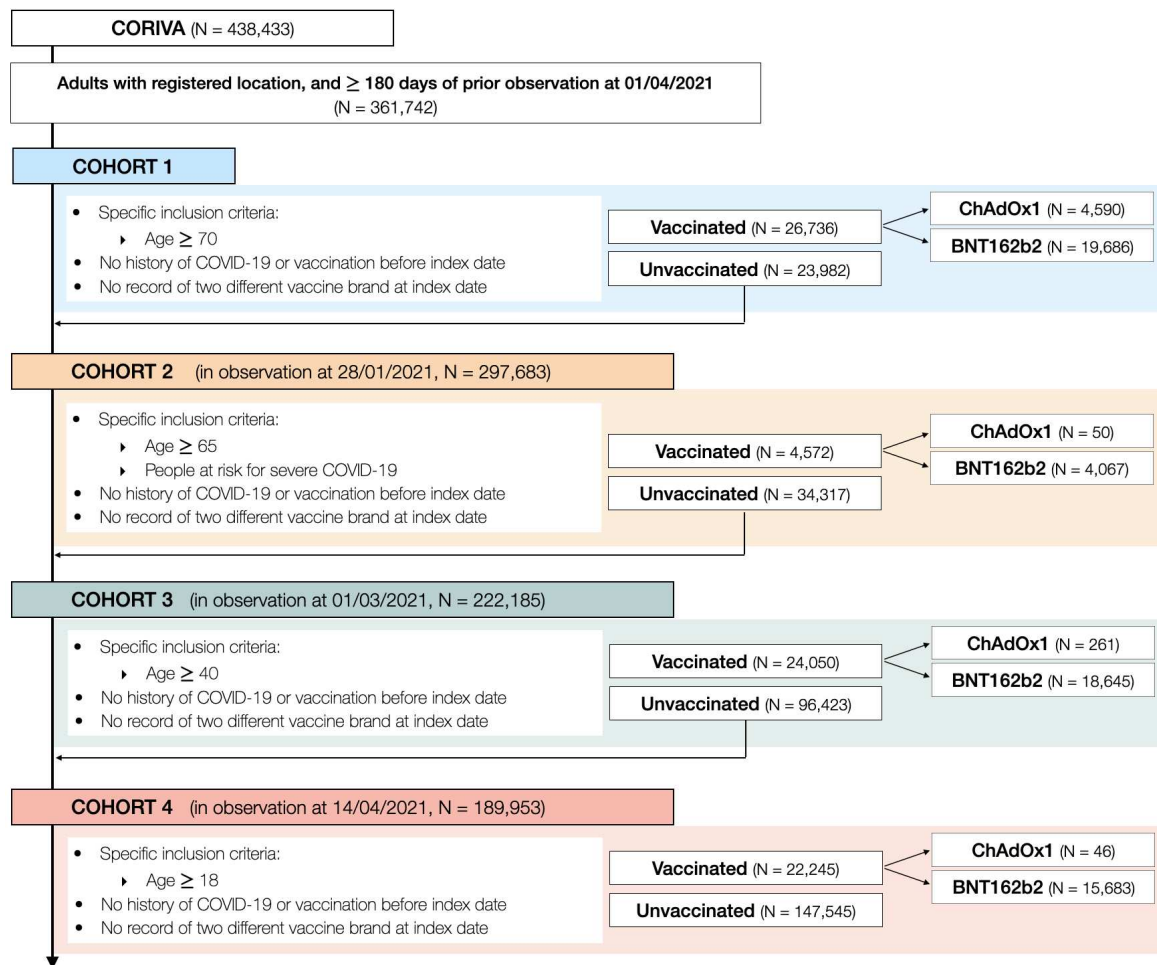

**Table S1: Characteristics of unweighted populations in CPRD AURUM, database, stratified by staggered cohort and exposure status. Exposure is any COVID-19 vaccine.**

|                                                  | Cohort 1      |               |       | Cohort 2        |               |       | Cohort 3      |               |       | Cohort 4      |               |       |
|--------------------------------------------------|---------------|---------------|-------|-----------------|---------------|-------|---------------|---------------|-------|---------------|---------------|-------|
|                                                  | Unvaccinated  | Vaccinated    | ASMD  | Unvaccinated    | Vaccinated    | ASMD  | Unvaccinated  | Vaccinated    | ASMD  | Unvaccinated  | Vaccinated    | ASMD  |
| <b>N (individuals)</b>                           | 346,674       | 552,602       |       | 1,975,726       | 1,563,569     |       | 1,510,401     | 1,528,031     |       | 2,027,763     | 2,085,598     |       |
| <b>Age, median [Q25-Q75]</b>                     | 78 [76-82]    | 81 [78-86]    | 0.319 | 42 [32-55]      | 68 [60-73]    | 0.995 | 41 [31-53]    | 55 [51-60]    | 0.610 | 35 [27-45]    | 35 [27-43]    | 0.134 |
| <b>Sex: Female, N(%)</b>                         | 192,771 (56%) | 314,141 (57%) | 0.025 | 1,244,636 (63%) | 852,976 (55%) | 0.172 | 880,404 (58%) | 771,929 (51%) | 0.157 | 862,676 (43%) | 958,124 (46%) | 0.068 |
| <b>Years of prior history*, median [Q25-Q75]</b> | 24 [10-35]    | 25 [11-37]    | 0.056 | 15 [7-25]       | 21 [9-32]     | 0.278 | 13 [6-22]     | 17 [8-27]     | 0.207 | 8 [4-16]      | 8 [3-18]      | 0.032 |
| <b>Number of GP visits, median [Q25-Q75]</b>     | 10 [5-17]     | 11 [6-19]     | 0.105 | 6 [2-11]        | 10 [6-17]     | 0.367 | 4 [1-10]      | 7 [3-12]      | 0.180 | 2 [0-5]       | 3 [1-7]       | 0.108 |
| <b>Number of PCR tests, median [Q25-Q75]</b>     | 0[0-0]        | 0[0-0]        | 0.103 | 0[0-0]          | 0[0-0]        | 0.065 | 0[0-0]        | 0[0-0]        | 0.007 | 0[0-0]        | 0[0-0]        | 0.078 |
| <b>Comorbidities**, N(%)</b>                     |               |               |       |                 |               |       |               |               |       |               |               |       |
| Anxiety                                          | 51,067 (15%)  | 82,765 (15%)  | 0.007 | 435,770 (22%)   | 309,567 (20%) | 0.056 | 289,563 (19%) | 292,336 (19%) | 0.001 | 265,627 (13%) | 338,058 (16%) | 0.088 |
| Asthma                                           | 36,474 (11%)  | 61,899 (11%)  | 0.022 | 501,209 (25%)   | 275,768 (18%) | 0.189 | 294,123 (19%) | 209,708 (14%) | 0.155 | 138,317 (7%)  | 173,056 (8%)  | 0.056 |
| Chronic kidney disease                           | 71,083 (21%)  | 137,953 (25%) | 0.107 | 55,104 (3%)     | 154,263 (10%) | 0.294 | 24,340 (2%)   | 30,896 (2%)   | 0.031 | 18,625 (1%)   | 5,796 (0%)    | 0.083 |
| COPD                                             | 28,665 (8%)   | 47,422 (9%)   | 0.011 | 29,729 (2%)     | 107,297 (7%)  | 0.270 | 13,433 (1%)   | 15,685 (1%)   | 0.014 | 10,543 (1%)   | 2,535 (0%)    | 0.071 |
| Dementia                                         | 16,610 (5%)   | 32,934 (6%)   | 0.052 | 6,692 (0%)      | 15,828 (1%)   | 0.082 | 3,425 (0%)    | 3,219 (0%)    | 0.003 | 2,691 (0%)    | 575 (0%)      | 0.037 |
| Depressive disorder                              | 42,145 (12%)  | 64,840 (12%)  | 0.013 | 367,463 (19%)   | 283,390 (18%) | 0.012 | 236,584 (16%) | 265,876 (17%) | 0.047 | 210,644 (10%) | 253,317 (12%) | 0.056 |
| Diabetes                                         | 63,154 (18%)  | 101,682 (18%) | 0.005 | 107,425 (5%)    | 253,026 (16%) | 0.351 | 60,932 (4%)   | 84,224 (6%)   | 0.069 | 49,154 (2%)   | 22,968 (1%)   | 0.101 |
| GERD                                             | 18,336 (5%)   | 32,360 (6%)   | 0.025 | 68,070 (3%)     | 84,985 (5%)   | 0.097 | 39,594 (3%)   | 58,961 (4%)   | 0.070 | 31,119 (2%)   | 38,612 (2%)   | 0.025 |
| Heart failure                                    | 17,882 (5%)   | 33,578 (6%)   | 0.040 | 12,275 (1%)     | 37,396 (2%)   | 0.146 | 5,641 (0%)    | 7,204 (0%)    | 0.015 | 4,611 (0%)    | 1,163 (0%)    | 0.046 |
| Hypertension                                     | 172,799 (50%) | 301,294 (55%) | 0.094 | 206,105 (10%)   | 545,782 (35%) | 0.611 | 110,912 (7%)  | 240,120 (16%) | 0.264 | 86,435 (4%)   | 54,357 (3%)   | 0.091 |
| Hypothyroidism                                   | 31,444 (9%)   | 56,367 (10%)  | 0.038 | 78,934 (4%)     | 118,453 (8%)  | 0.154 | 43,892 (3%)   | 67,686 (4%)   | 0.081 | 30,993 (2%)   | 35,364 (2%)   | 0.013 |
| Malignant neoplastic                             | 68,984 (20%)  | 131,635       | 0.095 | 60,318 (3%)     | 207,240       | 0.379 | 29,689 (2%)   | 61,923 (4%)   | 0.122 | 22,701 (1%)   | 13,590 (1%)   | 0.050 |

| disease                | Cohort 1     |              |       | Cohort 2     |             |       | Cohort 3     |             |       | Cohort 4     |             |       |
|------------------------|--------------|--------------|-------|--------------|-------------|-------|--------------|-------------|-------|--------------|-------------|-------|
|                        | Unvaccinated | Vaccinated   | ASMD  | Unvaccinated | Vaccinated  | ASMD  | Unvaccinated | Vaccinated  | ASMD  | Unvaccinated | Vaccinated  | ASMD  |
|                        |              | (24%)        |       |              | (13%)       |       |              |             |       |              |             |       |
| Myocardial infarction  | 16,027 (5%)  | 29,525 (5%)  | 0.033 | 20,259 (1%)  | 56,161 (4%) | 0.172 | 7,396 (0%)   | 12,703 (1%) | 0.042 | 5,764 (0%)   | 1,621 (0%)  | 0.049 |
| Osteoporosis           | 29,909 (9%)  | 59,521 (11%) | 0.072 | 18,263 (1%)  | 64,108 (4%) | 0.204 | 8,846 (1%)   | 15,089 (1%) | 0.045 | 6,922 (0%)   | 2,535 (0%)  | 0.046 |
| Pneumonia              | 16,992 (5%)  | 28,398 (5%)  | 0.011 | 31,746 (2%)  | 50,739 (3%) | 0.107 | 17,785 (1%)  | 22,064 (1%) | 0.023 | 13,305 (1%)  | 13,282 (1%) | 0.002 |
| Rheumatoid arthritis   | 6,596 (2%)   | 11,237 (2%)  | 0.009 | 14,811 (1%)  | 33,173 (2%) | 0.116 | 5,548 (0%)   | 9,130 (1%)  | 0.033 | 3,710 (0%)   | 1,816 (0%)  | 0.026 |
| Stroke                 | 15,249 (4%)  | 26,478 (5%)  | 0.019 | 16,942 (1%)  | 39,907 (3%) | 0.131 | 7,422 (0%)   | 10,828 (1%) | 0.028 | 6,030 (0%)   | 2,291 (0%)  | 0.042 |
| Venous thromboembolism | 19,607 (6%)  | 35,332 (6%)  | 0.031 | 28,876 (1%)  | 63,048 (4%) | 0.158 | 13,608 (1%)  | 26,299 (2%) | 0.072 | 12,945 (1%)  | 4,787 (0%)  | 0.062 |

The 4 cohorts represent vaccine rollout periods. \*Calculated as the days of previous observation in the database before index date. \*\*Assessed anytime before index date. ASMD = Absolute standardized mean difference, GP = General practice, PCR = Polymerase chain reaction, COPD = Chronic obstructive pulmonary disease, GERD = Gastro-Esophageal reflux disease

**Table S2: Characteristics of weighted populations in CPRD AURUM, database, stratified by staggered cohort and exposure status. Exposure is ChAdOx1 vaccine.**

|                                                  | Cohort 1     |              |       | Cohort 2      |               |       | Cohort 3      |               |       | Cohort 4      |               |       |
|--------------------------------------------------|--------------|--------------|-------|---------------|---------------|-------|---------------|---------------|-------|---------------|---------------|-------|
|                                                  | Unvaccinated | Vaccinated   | ASMD  | Unvaccinated  | Vaccinated    | ASMD  | Unvaccinated  | Vaccinated    | ASMD  | Unvaccinated  | Vaccinated    | ASMD  |
| <b>N (individuals)</b>                           | 100,517      | 99,985       |       | 308,608       | 304,995       |       | 448,766       | 445,397       |       | 242,955       | 243,847       |       |
| <b>Age, median [Q25-Q75]</b>                     | 78 [76-84]   | 78 [76-84]   | 0.001 | 62 [47-69]    | 62 [47-69]    | 0.007 | 50 [41-57]    | 52 [41-57]    | 0.001 | 44 [41-48]    | 44 [41-48]    | 0.003 |
| <b>Sex: Female, N(%)</b>                         | 57,756 (57%) | 57,174 (57%) | 0.006 | 179,574 (58%) | 176,871 (58%) | 0.004 | 236,260 (53%) | 234,320 (53%) | 0.001 | 101,805 (42%) | 100,846 (41%) | 0.011 |
| <b>Years of prior history*, median [Q25-Q75]</b> | 24 [10-36]   | 24 [10-36]   | 0.004 | 18 [8-29]     | 18 [8-29]     | 0.002 | 14 [6-24]     | 14 [6-24]     | 0.002 | 10 [5-18]     | 9 [5-18]      | 0.004 |
| <b>Number of GP visits, median [Q25-Q75]</b>     | 10 [5-18]    | 10 [6-18]    | 0.003 | 8 [3-15]      | 8 [5-15]      | 0.003 | 4 [1-11]      | 6 [2-10]      | 0.007 | 2 [0-7]       | 2 [1-7]       | 0.016 |
| <b>Number of PCR tests, median [Q25-Q75]</b>     | 0[0-0]       | 0[0-0]       | 0.011 | 0[0-0]        | 0[0-0]        | 0.003 | 0[0-0]        | 0[0-0]        | 0.003 | 0[0-0]        | 0[0-0]        | 0.005 |
| <b>Comorbidities**, N(%)</b>                     |              |              |       |               |               |       |               |               |       |               |               |       |
| Anxiety                                          | 15,457 (15%) | 15,069 (15%) | 0.009 | 67,125 (22%)  | 64,408 (21%)  | 0.015 | 90,806 (20%)  | 87,243 (20%)  | 0.016 | 37,475 (15%)  | 38,040 (16%)  | 0.005 |
| Asthma                                           | 10,993 (11%) | 10,863 (11%) | 0.002 | 65,274 (21%)  | 62,424 (20%)  | 0.017 | 76,417 (17%)  | 75,841 (17%)  | 0.000 | 17,944 (7%)   | 17,468 (7%)   | 0.009 |
| Chronic kidney disease                           | 23,223 (23%) | 22,872 (23%) | 0.005 | 23,022 (7%)   | 24,288 (8%)   | 0.019 | 8,460 (2%)    | 8,356 (2%)    | 0.001 | 2,419 (1%)    | 2,043 (1%)    | 0.017 |
| COPD                                             | 8,669 (9%)   | 8,770 (9%)   | 0.005 | 14,411 (5%)   | 15,226 (5%)   | 0.015 | 5,747 (1%)    | 4,794 (1%)    | 0.019 | 1,263 (1%)    | 1,250 (1%)    | 0.001 |
| Dementia                                         | 6,529 (6%)   | 6,431 (6%)   | 0.003 | 3,880 (1%)    | 3,541 (1%)    | 0.009 | 898 (0%)      | 1,004 (0%)    | 0.006 | 203 (0%)      | 399 (0%)      | 0.023 |
| Depressive disorder                              | 12,559 (12%) | 12,267 (12%) | 0.007 | 60,745 (20%)  | 57,903 (19%)  | 0.018 | 80,264 (18%)  | 77,017 (17%)  | 0.016 | 32,304 (13%)  | 33,302 (14%)  | 0.011 |
| Diabetes                                         | 18,750 (19%) | 18,602 (19%) | 0.001 | 39,262 (13%)  | 38,979 (13%)  | 0.002 | 25,334 (6%)   | 26,121 (6%)   | 0.009 | 6,679 (3%)    | 6,315 (3%)    | 0.010 |
| GERD                                             | 5,590 (6%)   | 5,471 (5%)   | 0.004 | 14,645 (5%)   | 14,339 (5%)   | 0.002 | 14,758 (3%)   | 14,823 (3%)   | 0.002 | 5,727 (2%)    | 6,021 (2%)    | 0.007 |
| Heart failure                                    | 6,181 (6%)   | 5,763 (6%)   | 0.016 | 6,098 (2%)    | 5,685 (2%)    | 0.008 | 2,241 (0%)    | 1,983 (0%)    | 0.008 | 610 (0%)      | 545 (0%)      | 0.006 |
| Hypertension                                     | 52,737 (52%) | 51,796 (52%) | 0.013 | 78,623 (25%)  | 79,827 (26%)  | 0.016 | 51,054 (11%)  | 51,059 (11%)  | 0.003 | 15,350 (6%)   | 15,670 (6%)   | 0.004 |
| Hypothyroidism                                   | 9,956 (10%)  | 9,690 (10%)  | 0.007 | 19,720 (6%)   | 19,562 (6%)   | 0.001 | 16,480 (4%)   | 16,361 (4%)   | 0.000 | 5,735 (2%)    | 5,984 (2%)    | 0.006 |
| Malignant neoplastic                             | 21,691 (22%) | 21,468       | 0.003 | 25,191 (8%)   | 27,892 (9%)   | 0.035 | 13,140 (3%)   | 12,870 (3%)   | 0.002 | 4,003 (2%)    | 3,621 (1%)    | 0.013 |

| disease                | Cohort 1     |              |       | Cohort 2     |            |       | Cohort 3     |            |       | Cohort 4     |            |       |
|------------------------|--------------|--------------|-------|--------------|------------|-------|--------------|------------|-------|--------------|------------|-------|
|                        | Unvaccinated | Vaccinated   | ASMD  | Unvaccinated | Vaccinated | ASMD  | Unvaccinated | Vaccinated | ASMD  | Unvaccinated | Vaccinated | ASMD  |
|                        |              | (21%)        |       |              |            |       |              |            |       |              |            |       |
| Myocardial infarction  | 5,182 (5%)   | 4,988 (5%)   | 0.008 | 7,777 (3%)   | 8,594 (3%) | 0.018 | 3,415 (1%)   | 3,228 (1%) | 0.004 | 933 (0%)     | 636 (0%)   | 0.022 |
| Osteoporosis           | 9,975 (10%)  | 10,018 (10%) | 0.003 | 9,052 (3%)   | 9,423 (3%) | 0.009 | 3,285 (1%)   | 3,499 (1%) | 0.006 | 840 (0%)     | 934 (0%)   | 0.006 |
| Pneumonia              | 5,770 (6%)   | 5,268 (5%)   | 0.021 | 9,096 (3%)   | 8,541 (3%) | 0.009 | 6,196 (1%)   | 6,077 (1%) | 0.001 | 1,923 (1%)   | 2,040 (1%) | 0.005 |
| Rheumatoid arthritis   | 2,002 (2%)   | 2,063 (2%)   | 0.005 | 4,856 (2%)   | 4,971 (2%) | 0.004 | 2,266 (1%)   | 2,795 (1%) | 0.016 | 665 (0%)     | 478 (0%)   | 0.016 |
| Stroke                 | 5,085 (5%)   | 4,791 (5%)   | 0.012 | 6,650 (2%)   | 6,616 (2%) | 0.001 | 3,150 (1%)   | 2,942 (1%) | 0.005 | 908 (0%)     | 773 (0%)   | 0.010 |
| Venous thromboembolism | 6,342 (6%)   | 6,069 (6%)   | 0.010 | 9,208 (3%)   | 9,850 (3%) | 0.014 | 6,193 (1%)   | 7,393 (2%) | 0.023 | 2,532 (1%)   | 1,239 (1%) | 0.061 |

The 4 cohorts represent vaccine rollout periods. \*Calculated as the days of previous observation in the database before index date. \*\*Assessed anytime before index date. ASMD = Absolute standardized mean difference, GP = General practice, PCR = Polymerase chain reaction, COPD = Chronic obstructive pulmonary disease, GERD = Gastro-Esophageal reflux disease

**Table S3: Characteristics of unweighted populations in CPRD AURUM, database, stratified by staggered cohort and exposure status. Exposure is ChAdOx1 vaccine.**

|                                                  | Cohort 1      |               |       | Cohort 2        |               |       | Cohort 3      |               |       | Cohort 4      |               |       |
|--------------------------------------------------|---------------|---------------|-------|-----------------|---------------|-------|---------------|---------------|-------|---------------|---------------|-------|
|                                                  | Unvaccinated  | Vaccinated    | ASMD  | Unvaccinated    | Vaccinated    | ASMD  | Unvaccinated  | Vaccinated    | ASMD  | Unvaccinated  | Vaccinated    | ASMD  |
| <b>N (individuals)</b>                           | 344,687       | 219,804       |       | 1,975,770       | 969,262       |       | 1,510,493     | 1,473,602     |       | 2,066,318     | 542,670       |       |
| <b>Age, median [Q25-Q75]</b>                     | 78 [76-82]    | 80 [77-85]    | 0.240 | 42 [32-55]      | 69 [63-73]    | 1.059 | 41 [31-53]    | 55 [51-60]    | 0.605 | 34 [27-45]    | 45 [42-48]    | 0.507 |
| <b>Sex: Female, N(%)</b>                         | 191,649 (56%) | 127,656 (58%) | 0.050 | 1,244,532 (63%) | 528,692 (55%) | 0.172 | 880,468 (58%) | 739,444 (50%) | 0.163 | 880,225 (43%) | 242,758 (45%) | 0.043 |
| <b>Years of prior history*, median [Q25-Q75]</b> | 24 [10-35]    | 24 [9-36]     | 0.018 | 15 [7-25]       | 21 [9-33]     | 0.288 | 13 [6-22]     | 17 [8-27]     | 0.203 | 7 [4-16]      | 10 [5-18]     | 0.143 |
| <b>Number of GP visits, median [Q25-Q75]</b>     | 10 [5-17]     | 12 [6-19]     | 0.121 | 6 [2-11]        | 10 [6-17]     | 0.359 | 4 [1-10]      | 7 [3-12]      | 0.169 | 2 [0-5]       | 3 [1-8]       | 0.146 |
| <b>Number of PCR tests, median [Q25-Q75]</b>     | 0[0-0]        | 0[0-0]        | 0.194 | 0[0-0]          | 0[0-0]        | 0.070 | 0[0-0]        | 0[0-0]        | 0.005 | 0[0-0]        | 0[0-0]        | 0.066 |
| <b>Comorbidities**, N(%)</b>                     |               |               |       |                 |               |       |               |               |       |               |               |       |
| Anxiety                                          | 50,786 (15%)  | 33,355 (15%)  | 0.012 | 435,737 (22%)   | 187,469 (19%) | 0.067 | 289,618 (19%) | 281,846 (19%) | 0.001 | 268,451 (13%) | 86,805 (16%)  | 0.085 |
| Asthma                                           | 36,259 (11%)  | 24,009 (11%)  | 0.013 | 501,234 (25%)   | 159,162 (16%) | 0.221 | 294,156 (19%) | 200,995 (14%) | 0.157 | 140,178 (7%)  | 41,393 (8%)   | 0.033 |
| Chronic kidney disease                           | 70,604 (20%)  | 51,053 (23%)  | 0.066 | 55,103 (3%)     | 97,339 (10%)  | 0.299 | 24,361 (2%)   | 24,198 (2%)   | 0.002 | 18,798 (1%)   | 2,879 (1%)    | 0.045 |
| COPD                                             | 28,448 (8%)   | 19,105 (9%)   | 0.016 | 29,730 (2%)     | 67,700 (7%)   | 0.274 | 13,436 (1%)   | 13,621 (1%)   | 0.004 | 10,647 (1%)   | 1,510 (0%)    | 0.038 |
| Dementia                                         | 16,327 (5%)   | 16,795 (8%)   | 0.121 | 6,689 (0%)      | 12,106 (1%)   | 0.103 | 3,424 (0%)    | 1,896 (0%)    | 0.023 | 2,729 (0%)    | 447 (0%)      | 0.015 |
| Depressive disorder                              | 41,905 (12%)  | 27,009 (12%)  | 0.004 | 367,500 (19%)   | 170,626 (18%) | 0.026 | 236,628 (16%) | 256,789 (17%) | 0.047 | 212,626 (10%) | 74,210 (14%)  | 0.104 |
| Diabetes                                         | 62,733 (18%)  | 39,751 (18%)  | 0.003 | 107,449 (5%)    | 154,348 (16%) | 0.344 | 60,968 (4%)   | 78,394 (5%)   | 0.061 | 49,223 (2%)   | 9,729 (2%)    | 0.041 |
| GERD                                             | 18,253 (5%)   | 12,156 (6%)   | 0.010 | 68,089 (3%)     | 52,694 (5%)   | 0.097 | 39,619 (3%)   | 56,444 (4%)   | 0.068 | 31,367 (2%)   | 13,807 (3%)   | 0.073 |
| Heart failure                                    | 17,716 (5%)   | 13,147 (6%)   | 0.037 | 12,277 (1%)     | 24,276 (3%)   | 0.152 | 5,638 (0%)    | 5,673 (0%)    | 0.002 | 4,625 (0%)    | 681 (0%)      | 0.024 |
| Hypertension                                     | 171,846 (50%) | 114,922 (52%) | 0.049 | 206,105 (10%)   | 345,014 (36%) | 0.626 | 110,975 (7%)  | 224,543 (15%) | 0.251 | 87,010 (4%)   | 31,330 (6%)   | 0.072 |
| Hypothyroidism                                   | 31,256 (9%)   | 21,855 (10%)  | 0.030 | 78,921 (4%)     | 73,992 (8%)   | 0.156 | 43,887 (3%)   | 64,026 (4%)   | 0.077 | 31,315 (2%)   | 13,920 (3%)   | 0.074 |
| Malignant neoplastic disease                     | 68,598 (20%)  | 49,023 (22%)  | 0.059 | 60,355 (3%)     | 131,135 (14%) | 0.387 | 29,693 (2%)   | 55,601 (4%)   | 0.108 | 22,873 (1%)   | 7,505 (1%)    | 0.025 |

|                        | Cohort 1     |              |       | Cohort 2     |             |       | Cohort 3     |             |       | Cohort 4     |            |       |
|------------------------|--------------|--------------|-------|--------------|-------------|-------|--------------|-------------|-------|--------------|------------|-------|
|                        | Unvaccinated | Vaccinated   | ASMD  | Unvaccinated | Vaccinated  | ASMD  | Unvaccinated | Vaccinated  | ASMD  | Unvaccinated | Vaccinated | ASMD  |
| Myocardial infarction  | 15,938 (5%)  | 11,236 (5%)  | 0.023 | 20,262 (1%)  | 33,142 (3%) | 0.163 | 7,401 (0%)   | 11,237 (1%) | 0.035 | 5,781 (0%)   | 861 (0%)   | 0.026 |
| Osteoporosis           | 29,704 (9%)  | 22,986 (10%) | 0.063 | 18,255 (1%)  | 42,319 (4%) | 0.216 | 8,856 (1%)   | 12,455 (1%) | 0.031 | 6,980 (0%)   | 1,380 (0%) | 0.015 |
| Pneumonia              | 16,837 (5%)  | 12,101 (6%)  | 0.028 | 31,706 (2%)  | 33,170 (3%) | 0.116 | 17,787 (1%)  | 20,399 (1%) | 0.018 | 13,425 (1%)  | 4,297 (1%) | 0.017 |
| Rheumatoid arthritis   | 6,549 (2%)   | 4,544 (2%)   | 0.012 | 14,813 (1%)  | 20,294 (2%) | 0.114 | 5,536 (0%)   | 8,463 (1%)  | 0.030 | 3,723 (0%)   | 821 (0%)   | 0.007 |
| Stroke                 | 15,118 (4%)  | 10,876 (5%)  | 0.027 | 16,944 (1%)  | 24,851 (3%) | 0.132 | 7,424 (0%)   | 9,547 (1%)  | 0.021 | 6,059 (0%)   | 1,153 (0%) | 0.016 |
| Venous thromboembolism | 19,455 (6%)  | 13,782 (6%)  | 0.026 | 28,887 (1%)  | 39,415 (4%) | 0.159 | 13,609 (1%)  | 24,312 (2%) | 0.067 | 13,021 (1%)  | 1,936 (0%) | 0.039 |

The 4 cohorts represent vaccine rollout periods. \*Calculated as the days of previous observation in the database before index date. \*\*Assessed anytime before index date. ASMD = Absolute standardized mean difference, GP = General practice, PCR = Polymerase chain reaction, COPD = Chronic obstructive pulmonary disease, GERD = Gastro-Esophageal reflux disease



**Table S4: Characteristics of weighted populations in CPRD AURUM, database, stratified by staggered cohort and exposure status. Exposure is BNT162b2 vaccine.**

|                                                  | Cohort 1     |              |       | Cohort 2      |               |       | Cohort 3     |              |       | Cohort 4      |               |       |
|--------------------------------------------------|--------------|--------------|-------|---------------|---------------|-------|--------------|--------------|-------|---------------|---------------|-------|
|                                                  | Unvaccinated | Vaccinated   | ASMD  | Unvaccinated  | Vaccinated    | ASMD  | Unvaccinated | Vaccinated   | ASMD  | Unvaccinated  | Vaccinated    | ASMD  |
| <b>N (individuals)</b>                           | 105,853      | 106,684      |       | 255,400       | 253,164       |       | 37,236       | 37,227       |       | 630,449       | 633,628       |       |
| <b>Age, median [Q25-Q75]</b>                     | 80 [77-85]   | 80 [77-85]   | 0.003 | 58 [46-67]    | 58 [46-68]    | 0.006 | 54 [45-64]   | 54 [45-64]   | 0.016 | 32 [25-37]    | 32 [25-37]    | 0.001 |
| <b>Sex: Female, N(%)</b>                         | 60,612 (57%) | 60,891 (57%) | 0.004 | 147,020 (58%) | 146,572 (58%) | 0.007 | 22,049 (59%) | 22,144 (59%) | 0.005 | 278,649 (44%) | 282,744 (45%) | 0.009 |
| <b>Years of prior history*, median [Q25-Q75]</b> | 24 [11-36]   | 24 [11-35]   | 0.005 | 18 [8-29]     | 18 [8-29]     | 0.007 | 16 [7-27]    | 17 [7-27]    | 0.007 | 7 [4-16]      | 7 [3-18]      | 0.006 |
| <b>Number of GP visits, median [Q25-Q75]</b>     | 10 [5-18]    | 10 [6-17]    | 0.002 | 8 [3-15]      | 10 [5-15]     | 0.013 | 6 [2-15]     | 8 [4-14]     | 0.003 | 2 [0-6]       | 2 [0-6]       | 0.011 |
| <b>Number of PCR tests, median [Q25-Q75]</b>     | 0[0-0]       | 0[0-0]       | 0.001 | 0[0-0]        | 0[0-0]        | 0.003 | 0[0-0]       | 0[0-0]       | 0.000 | 0[0-0]        | 0[0-0]        | 0.010 |
| <b>Comorbidities**, N(%)</b>                     |              |              |       |               |               |       |              |              |       |               |               |       |
| Anxiety                                          | 15,706 (15%) | 15,578 (15%) | 0.007 | 57,951 (23%)  | 55,594 (22%)  | 0.018 | 7,672 (21%)  | 7,363 (20%)  | 0.021 | 96,918 (15%)  | 96,528 (15%)  | 0.004 |
| Asthma                                           | 11,563 (11%) | 11,733 (11%) | 0.002 | 60,265 (24%)  | 58,010 (23%)  | 0.016 | 6,397 (17%)  | 6,215 (17%)  | 0.013 | 50,849 (8%)   | 48,590 (8%)   | 0.015 |
| Chronic kidney disease                           | 25,741 (24%) | 26,243 (25%) | 0.007 | 17,219 (7%)   | 18,864 (7%)   | 0.028 | 2,790 (7%)   | 2,621 (7%)   | 0.017 | 2,035 (0%)    | 1,846 (0%)    | 0.006 |
| COPD                                             | 9,240 (9%)   | 8,999 (8%)   | 0.011 | 11,625 (5%)   | 12,410 (5%)   | 0.017 | 1,224 (3%)   | 886 (2%)     | 0.055 | 859 (0%)      | 807 (0%)      | 0.002 |
| Dementia                                         | 6,683 (6%)   | 5,727 (5%)   | 0.040 | 2,225 (1%)    | 1,309 (1%)    | 0.043 | 618 (2%)     | 529 (1%)     | 0.019 | 112 (0%)      | 107 (0%)      | 0.001 |
| Depressive disorder                              | 12,529 (12%) | 12,450 (12%) | 0.005 | 52,883 (21%)  | 50,765 (20%)  | 0.016 | 6,588 (18%)  | 6,431 (17%)  | 0.011 | 71,832 (11%)  | 71,139 (11%)  | 0.005 |
| Diabetes                                         | 20,227 (19%) | 20,182 (19%) | 0.005 | 32,557 (13%)  | 32,989 (13%)  | 0.008 | 3,153 (8%)   | 3,212 (9%)   | 0.006 | 8,183 (1%)    | 7,675 (1%)    | 0.008 |
| GERD                                             | 6,148 (6%)   | 5,937 (6%)   | 0.011 | 12,436 (5%)   | 12,160 (5%)   | 0.003 | 1,552 (4%)   | 1,509 (4%)   | 0.006 | 9,586 (2%)    | 10,173 (2%)   | 0.007 |
| Heart failure                                    | 6,643 (6%)   | 6,329 (6%)   | 0.014 | 4,618 (2%)    | 3,987 (2%)    | 0.018 | 767 (2%)     | 552 (1%)     | 0.044 | 474 (0%)      | 344 (0%)      | 0.008 |
| Hypertension                                     | 56,732 (54%) | 57,023 (53%) | 0.003 | 62,628 (25%)  | 63,500 (25%)  | 0.013 | 7,802 (21%)  | 7,697 (21%)  | 0.007 | 11,603 (2%)   | 12,098 (2%)   | 0.005 |
| Hypothyroidism                                   | 10,528 (10%) | 10,633 (10%) | 0.001 | 16,084 (6%)   | 16,368 (6%)   | 0.007 | 2,046 (5%)   | 2,032 (5%)   | 0.002 | 8,722 (1%)    | 8,355 (1%)    | 0.006 |
| Malignant neoplastic disease                     | 23,367 (22%) | 23,618 (22%) | 0.002 | 19,432 (8%)   | 22,945 (9%)   | 0.053 | 2,799 (8%)   | 2,742 (7%)   | 0.006 | 3,432 (1%)    | 2,913 (0%)    | 0.012 |

|                        | Cohort 1     |              |       | Cohort 2     |            |       | Cohort 3     |            |       | Cohort 4     |            |       |
|------------------------|--------------|--------------|-------|--------------|------------|-------|--------------|------------|-------|--------------|------------|-------|
|                        | Unvaccinated | Vaccinated   | ASMD  | Unvaccinated | Vaccinated | ASMD  | Unvaccinated | Vaccinated | ASMD  | Unvaccinated | Vaccinated | ASMD  |
| Myocardial infarction  | 5,451 (5%)   | 5,473 (5%)   | 0.001 | 6,811 (3%)   | 7,856 (3%) | 0.026 | 704 (2%)     | 637 (2%)   | 0.013 | 607 (0%)     | 569 (0%)   | 0.002 |
| Osteoporosis           | 10,923 (10%) | 10,997 (10%) | 0.000 | 6,664 (3%)   | 6,208 (2%) | 0.010 | 1,166 (3%)   | 1,014 (3%) | 0.024 | 653 (0%)     | 702 (0%)   | 0.002 |
| Pneumonia              | 5,814 (5%)   | 5,303 (5%)   | 0.023 | 7,059 (3%)   | 6,337 (3%) | 0.016 | 991 (3%)     | 831 (2%)   | 0.028 | 3,698 (1%)   | 3,579 (1%) | 0.003 |
| Rheumatoid arthritis   | 2,115 (2%)   | 2,076 (2%)   | 0.004 | 4,061 (2%)   | 4,486 (2%) | 0.014 | 330 (1%)     | 382 (1%)   | 0.014 | 723 (0%)     | 523 (0%)   | 0.010 |
| Stroke                 | 5,304 (5%)   | 4,911 (5%)   | 0.019 | 5,139 (2%)   | 5,592 (2%) | 0.014 | 657 (2%)     | 560 (2%)   | 0.021 | 828 (0%)     | 669 (0%)   | 0.007 |
| Venous thromboembolism | 6,564 (6%)   | 6,603 (6%)   | 0.000 | 7,760 (3%)   | 7,984 (3%) | 0.007 | 980 (3%)     | 965 (3%)   | 0.003 | 2,860 (0%)   | 1,602 (0%) | 0.034 |

The 4 cohorts represent vaccine rollout periods. \*Calculated as the days of previous observation in the database before index date. \*\*Assessed anytime before index date. ASMD = Absolute standardized mean difference, GP = General practice, PCR = Polymerase chain reaction, COPD = Chronic obstructive pulmonary disease, GERD = Gastro-Esophageal reflux disease

**Table S5: Characteristics of unweighted populations in CPRD AURUM, database, stratified by staggered cohort and exposure status. Exposure is BNT162b2 vaccine.**

|                                                  | Cohort 1      |               |       | Cohort 2        |               |       | Cohort 3      |              |       | Cohort 4      |               |       |
|--------------------------------------------------|---------------|---------------|-------|-----------------|---------------|-------|---------------|--------------|-------|---------------|---------------|-------|
|                                                  | Unvaccinated  | Vaccinated    | ASMD  | Unvaccinated    | Vaccinated    | ASMD  | Unvaccinated  | Vaccinated   | ASMD  | Unvaccinated  | Vaccinated    | ASMD  |
| <b>N (individuals)</b>                           | 348,052       | 332,790       |       | 1,976,163       | 594,262       |       | 1,510,323     | 54,102       |       | 2,014,161     | 1,335,671     |       |
| <b>Age, median [Q25-Q75]</b>                     | 78 [76-82]    | 82 [79-86]    | 0.375 | 42 [32-55]      | 67 [56-73]    | 0.899 | 41 [31-53]    | 58 [50-82]   | 0.777 | 35 [27-45]    | 31 [25-37]    | 0.377 |
| <b>Sex: Female, N(%)</b>                         | 193,520 (56%) | 186,481 (56%) | 0.009 | 1,244,798 (63%) | 324,259 (55%) | 0.172 | 880,418 (58%) | 32,310 (60%) | 0.029 | 856,596 (43%) | 625,195 (47%) | 0.086 |
| <b>Years of prior history*, median [Q25-Q75]</b> | 23 [10-35]    | 26 [13-38]    | 0.081 | 15 [7-25]       | 21 [9-32]     | 0.261 | 13 [6-22]     | 19 [8-30]    | 0.308 | 8 [4-16]      | 7 [3-19]      | 0.012 |
| <b>Number of GP visits, median [Q25-Q75]</b>     | 10 [5-17]     | 11 [6-18]     | 0.094 | 6 [2-11]        | 11 [6-17]     | 0.381 | 4 [1-10]      | 10 [5-17]    | 0.436 | 2 [0-5]       | 3 [1-7]       | 0.103 |
| <b>Number of PCR tests, median [Q25-Q75]</b>     | 0[0-0]        | 0[0-0]        | 0.013 | 0[0-0]          | 0[0-0]        | 0.056 | 0[0-0]        | 0[0-0]       | 0.165 | 0[0-0]        | 0[0-0]        | 0.082 |
| <b>Comorbidities**, N(%)</b>                     |               |               |       |                 |               |       |               |              |       |               |               |       |
| Anxiety                                          | 51,245 (15%)  | 49,410 (15%)  | 0.003 | 435,705 (22%)   | 122,087 (21%) | 0.037 | 289,623 (19%) | 10,441 (19%) | 0.003 | 264,577 (13%) | 218,144 (16%) | 0.090 |
| Asthma                                           | 36,625 (11%)  | 37,889 (11%)  | 0.028 | 501,289 (25%)   | 116,596 (20%) | 0.138 | 294,101 (19%) | 8,668 (16%)  | 0.090 | 137,548 (7%)  | 114,378 (9%)  | 0.065 |
| Chronic kidney disease                           | 71,413 (21%)  | 86,899 (26%)  | 0.133 | 55,136 (3%)     | 56,923 (10%)  | 0.285 | 24,372 (2%)   | 6,692 (12%)  | 0.431 | 18,579 (1%)   | 2,664 (0%)    | 0.097 |
| COPD                                             | 28,829 (8%)   | 28,317 (9%)   | 0.008 | 29,793 (2%)     | 39,595 (7%)   | 0.263 | 13,430 (1%)   | 2,063 (4%)   | 0.194 | 10,501 (1%)   | 942 (0%)      | 0.083 |
| Dementia                                         | 16,828 (5%)   | 16,138 (5%)   | 0.001 | 6,731 (0%)      | 3,720 (1%)    | 0.041 | 3,424 (0%)    | 1,323 (2%)   | 0.194 | 2,673 (0%)    | 119 (0%)      | 0.047 |
| Depressive disorder                              | 42,297 (12%)  | 37,831 (11%)  | 0.024 | 367,534 (19%)   | 112,753 (19%) | 0.010 | 236,577 (16%) | 9,046 (17%)  | 0.029 | 209,905 (10%) | 155,037 (12%) | 0.038 |
| Diabetes                                         | 63,483 (18%)  | 61,929 (19%)  | 0.010 | 107,471 (5%)    | 98,676 (17%)  | 0.362 | 60,945 (4%)   | 5,817 (11%)  | 0.259 | 49,143 (2%)   | 12,040 (1%)   | 0.120 |
| GERD                                             | 18,404 (5%)   | 20,204 (6%)   | 0.034 | 68,110 (3%)     | 32,288 (5%)   | 0.097 | 39,607 (3%)   | 2,506 (5%)   | 0.108 | 31,062 (2%)   | 21,599 (2%)   | 0.006 |
| Heart failure                                    | 17,980 (5%)   | 20,430 (6%)   | 0.042 | 12,311 (1%)     | 13,120 (2%)   | 0.134 | 5,627 (0%)    | 1,529 (3%)   | 0.197 | 4,614 (0%)    | 448 (0%)      | 0.054 |
| Hypertension                                     | 173,422 (50%) | 186,367 (56%) | 0.124 | 206,136 (10%)   | 200,762 (34%) | 0.586 | 110,969 (7%)  | 15,536 (29%) | 0.579 | 86,231 (4%)   | 19,649 (1%)   | 0.169 |
| Hypothyroidism                                   | 31,595 (9%)   | 34,512 (10%)  | 0.044 | 78,935 (4%)     | 44,456 (7%)   | 0.150 | 43,876 (3%)   | 3,642 (7%)   | 0.179 | 30,913 (2%)   | 18,516 (1%)   | 0.012 |
| Malignant neoplastic disease                     | 69,247 (20%)  | 82,610 (25%)  | 0.118 | 60,370 (3%)     | 76,103 (13%)  | 0.367 | 29,693 (2%)   | 6,311 (12%)  | 0.392 | 22,630 (1%)   | 5,104 (0%)    | 0.086 |

|                        | Cohort 1     |              |       | Cohort 2     |             |       | Cohort 3     |            |       | Cohort 4     |            |       |
|------------------------|--------------|--------------|-------|--------------|-------------|-------|--------------|------------|-------|--------------|------------|-------|
|                        | Unvaccinated | Vaccinated   | ASMD  | Unvaccinated | Vaccinated  | ASMD  | Unvaccinated | Vaccinated | ASMD  | Unvaccinated | Vaccinated | ASMD  |
| Myocardial infarction  | 16,111 (5%)  | 18,289 (5%)  | 0.040 | 20,304 (1%)  | 23,019 (4%) | 0.185 | 7,409 (0%)   | 1,464 (3%) | 0.177 | 5,738 (0%)   | 715 (0%)   | 0.056 |
| Osteoporosis           | 30,053 (9%)  | 36,535 (11%) | 0.079 | 18,282 (1%)  | 21,789 (4%) | 0.184 | 8,852 (1%)   | 2,632 (5%) | 0.265 | 6,904 (0%)   | 1,028 (0%) | 0.058 |
| Pneumonia              | 17,134 (5%)  | 16,297 (5%)  | 0.001 | 31,724 (2%)  | 17,567 (3%) | 0.091 | 17,791 (1%)  | 1,658 (3%) | 0.131 | 13,263 (1%)  | 7,793 (1%) | 0.010 |
| Rheumatoid arthritis   | 6,613 (2%)   | 6,693 (2%)   | 0.008 | 14,823 (1%)  | 12,878 (2%) | 0.118 | 5,533 (0%)   | 667 (1%)   | 0.097 | 3,692 (0%)   | 891 (0%)   | 0.033 |
| Stroke                 | 15,325 (4%)  | 15,601 (5%)  | 0.014 | 16,962 (1%)  | 15,056 (3%) | 0.130 | 7,431 (0%)   | 1,281 (2%) | 0.158 | 6,019 (0%)   | 1,022 (0%) | 0.051 |
| Venous thromboembolism | 19,679 (6%)  | 21,549 (6%)  | 0.034 | 28,882 (1%)  | 23,632 (4%) | 0.155 | 13,639 (1%)  | 1,980 (4%) | 0.185 | 12,941 (1%)  | 2,541 (0%) | 0.070 |

The 4 cohorts represent vaccine rollout periods. \*Calculated as the days of previous observation in the database before index date. \*\*Assessed anytime before index date. ASMD = Absolute standardized mean difference, GP = General practice, PCR = Polymerase chain reaction, COPD = Chronic obstructive pulmonary disease, GERD = Gastro-Esophageal reflux disease

**Table S6: Characteristics of weighted populations in CPRD GOLD, database, stratified by staggered cohort and exposure status. Exposure is any COVID-19 vaccine.**

|                                                  | Cohort 1     |              |       | Cohort 2     |              |       | Cohort 3     |              |       | Cohort 4     |              |       |
|--------------------------------------------------|--------------|--------------|-------|--------------|--------------|-------|--------------|--------------|-------|--------------|--------------|-------|
|                                                  | Unvaccinated | Vaccinated   | ASMD  |
| <b>N (individuals)</b>                           | 40,084       | 40,014       |       | 111,674      | 111,393      |       | 124,883      | 124,955      |       | 196,235      | 195,302      |       |
| <b>Age, median [Q25-Q75]</b>                     | 82 [78-86]   | 82 [78-86]   | 0.004 | 62 [50-69]   | 62 [50-69]   | 0.005 | 50 [41-58]   | 52 [41-58]   | 0.000 | 34 [26-42]   | 34 [26-43]   | 0.004 |
| <b>Sex: Female, N(%)</b>                         | 23,206 (58%) | 23,175 (58%) | 0.000 | 63,290 (57%) | 63,079 (57%) | 0.001 | 63,572 (51%) | 63,955 (51%) | 0.006 | 84,762 (43%) | 85,083 (44%) | 0.007 |
| <b>Years of prior history*, median [Q25-Q75]</b> | 17 [13-20]   | 18 [13-20]   | 0.001 | 17 [11-19]   | 17 [11-19]   | 0.005 | 17 [9-19]    | 17 [9-19]    | 0.000 | 13 [6-18]    | 14 [5-18]    | 0.006 |
| <b>Number of GP visits, median [Q25-Q75]</b>     | 12 [7-20]    | 12 [8-20]    | 0.000 | 8 [3-15]     | 10 [5-15]    | 0.000 | 4 [0-10]     | 4 [1-10]     | 0.009 | 0 [0-5]      | 2 [0-5]      | 0.004 |
| <b>Number of PCR tests, median [Q25-Q75]</b>     | 0[0-0]       | 0[0-0]       | 0.002 | 0[0-0]       | 0[0-0]       | 0.009 | 0[0-0]       | 0[0-0]       | 0.003 | 0[0-0]       | 0[0-0]       | 0.000 |
| <b>Comorbidities**, N(%)</b>                     |              |              |       |              |              |       |              |              |       |              |              |       |
| Anxiety                                          | 4,933 (12%)  | 4,920 (12%)  | 0.000 | 22,884 (20%) | 22,299 (20%) | 0.012 | 24,993 (20%) | 24,695 (20%) | 0.006 | 31,360 (16%) | 30,689 (16%) | 0.007 |
| Asthma                                           | 3,911 (10%)  | 3,931 (10%)  | 0.002 | 18,514 (17%) | 18,209 (16%) | 0.006 | 17,431 (14%) | 17,388 (14%) | 0.001 | 14,817 (8%)  | 14,596 (7%)  | 0.003 |
| Chronic kidney disease                           | 8,998 (22%)  | 8,953 (22%)  | 0.002 | 6,848 (6%)   | 7,431 (7%)   | 0.022 | 2,120 (2%)   | 2,287 (2%)   | 0.010 | 922 (0%)     | 807 (0%)     | 0.009 |
| COPD                                             | 3,439 (9%)   | 3,341 (8%)   | 0.008 | 5,972 (5%)   | 6,496 (6%)   | 0.021 | 2,089 (2%)   | 1,938 (2%)   | 0.010 | 734 (0%)     | 688 (0%)     | 0.004 |
| Dementia                                         | 2,634 (7%)   | 2,332 (6%)   | 0.031 | 1,383 (1%)   | 865 (1%)     | 0.046 | 283 (0%)     | 313 (0%)     | 0.005 | 78 (0%)      | 134 (0%)     | 0.013 |
| Depressive disorder                              | 3,783 (9%)   | 3,705 (9%)   | 0.006 | 20,874 (19%) | 20,246 (18%) | 0.013 | 22,015 (18%) | 21,682 (17%) | 0.007 | 23,010 (12%) | 22,630 (12%) | 0.004 |
| Diabetes                                         | 5,928 (15%)  | 5,802 (14%)  | 0.008 | 11,000 (10%) | 11,657 (10%) | 0.020 | 5,345 (4%)   | 5,651 (5%)   | 0.012 | 2,586 (1%)   | 2,366 (1%)   | 0.009 |
| GERD                                             | 1,930 (5%)   | 1,970 (5%)   | 0.005 | 4,521 (4%)   | 4,479 (4%)   | 0.001 | 3,343 (3%)   | 3,346 (3%)   | 0.000 | 2,657 (1%)   | 2,614 (1%)   | 0.001 |
| Heart failure                                    | 2,417 (6%)   | 2,205 (6%)   | 0.022 | 2,002 (2%)   | 2,029 (2%)   | 0.002 | 639 (1%)     | 614 (0%)     | 0.003 | 250 (0%)     | 207 (0%)     | 0.006 |
| Hypertension                                     | 14,288 (36%) | 14,282 (36%) | 0.001 | 22,488 (20%) | 22,695 (20%) | 0.006 | 11,108 (9%)  | 11,313 (9%)  | 0.006 | 4,318 (2%)   | 4,619 (2%)   | 0.011 |
| Hypothyroidism                                   | 3,151 (8%)   | 3,155 (8%)   | 0.001 | 6,321 (6%)   | 6,361 (6%)   | 0.002 | 4,134 (3%)   | 4,055 (3%)   | 0.004 | 2,475 (1%)   | 2,621 (1%)   | 0.007 |
| Malignant neoplastic disease                     | 8,302 (21%)  | 8,283 (21%)  | 0.000 | 8,661 (8%)   | 10,177 (9%)  | 0.050 | 3,813 (3%)   | 3,777 (3%)   | 0.002 | 1,614 (1%)   | 1,676 (1%)   | 0.004 |

|                        | Cohort 1     |            |       | Cohort 2     |            |       | Cohort 3     |            |       | Cohort 4     |            |       |
|------------------------|--------------|------------|-------|--------------|------------|-------|--------------|------------|-------|--------------|------------|-------|
|                        | Unvaccinated | Vaccinated | ASMD  |
| Myocardial infarction  | 2,119 (5%)   | 1,984 (5%) | 0.015 | 3,308 (3%)   | 3,740 (3%) | 0.023 | 1,193 (1%)   | 1,267 (1%) | 0.006 | 430 (0%)     | 343 (0%)   | 0.010 |
| Osteoporosis           | 3,702 (9%)   | 3,670 (9%) | 0.002 | 3,154 (3%)   | 3,179 (3%) | 0.002 | 1,038 (1%)   | 1,030 (1%) | 0.001 | 363 (0%)     | 375 (0%)   | 0.002 |
| Pneumonia              | 1,654 (4%)   | 1,452 (4%) | 0.026 | 2,424 (2%)   | 2,211 (2%) | 0.013 | 1,401 (1%)   | 1,314 (1%) | 0.007 | 1,035 (1%)   | 1,055 (1%) | 0.002 |
| Rheumatoid arthritis   | 637 (2%)     | 624 (2%)   | 0.002 | 1,618 (1%)   | 1,818 (2%) | 0.015 | 551 (0%)     | 760 (1%)   | 0.023 | 280 (0%)     | 157 (0%)   | 0.019 |
| Stroke                 | 2,103 (5%)   | 1,866 (5%) | 0.027 | 2,468 (2%)   | 2,512 (2%) | 0.003 | 916 (1%)     | 981 (1%)   | 0.006 | 385 (0%)     | 356 (0%)   | 0.003 |
| Venous thromboembolism | 1,732 (4%)   | 1,648 (4%) | 0.010 | 2,639 (2%)   | 2,596 (2%) | 0.002 | 1,466 (1%)   | 1,638 (1%) | 0.012 | 959 (0%)     | 518 (0%)   | 0.036 |

The 4 cohorts represent vaccine rollout periods. \*Calculated as the days of previous observation in the database before index date. \*\*Assessed anytime before index date. ASMD = Absolute standardized mean difference, GP = General practice, PCR = Polymerase chain reaction, COPD = Chronic obstructive pulmonary disease, GERD = Gastro-Esophageal reflux disease

**Table S7: Characteristics of unweighted populations in CPRD GOLD, database, stratified by staggered cohort and exposure status. Exposure is any COVID-19 vaccine.**

|                                                  | Cohort 1     |              |       | Cohort 2      |               |       | Cohort 3      |               |       | Cohort 4      |               |       |
|--------------------------------------------------|--------------|--------------|-------|---------------|---------------|-------|---------------|---------------|-------|---------------|---------------|-------|
|                                                  | Unvaccinated | Vaccinated   | ASMD  | Unvaccinated  | Vaccinated    | ASMD  | Unvaccinated  | Vaccinated    | ASMD  | Unvaccinated  | Vaccinated    | ASMD  |
| <b>N (individuals)</b>                           | 169,100      | 118,507      |       | 583,399       | 486,619       |       | 417,996       | 462,832       |       | 469,876       | 550,437       |       |
| <b>Age, median [Q25-Q75]</b>                     | 78 [76-82]   | 84 [81-87]   | 0.550 | 45 [33-58]    | 71 [66-75]    | 1.117 | 42 [31-55]    | 56 [52-61]    | 0.546 | 37 [28-49]    | 35 [27-43]    | 0.250 |
| <b>Sex: Female, N(%)</b>                         | 93,719 (55%) | 68,258 (58%) | 0.044 | 344,747 (59%) | 262,113 (54%) | 0.106 | 230,567 (55%) | 230,957 (50%) | 0.105 | 208,184 (44%) | 249,603 (45%) | 0.021 |
| <b>Years of prior history*, median [Q25-Q75]</b> | 17 [13-20]   | 18 [14-20]   | 0.023 | 17 [10-19]    | 17 [13-20]    | 0.085 | 17 [9-19]     | 17 [10-19]    | 0.055 | 13 [6-18]     | 14 [6-18]     | 0.020 |
| <b>Number of GP visits, median [Q25-Q75]</b>     | 11 [6-18]    | 14 [9-21]    | 0.180 | 5 [1-11]      | 11 [6-17]     | 0.414 | 3 [0-8]       | 6 [2-12]      | 0.239 | 0 [0-4]       | 2 [0-6]       | 0.115 |
| <b>Number of PCR tests, median [Q25-Q75]</b>     | 0[0-0]       | 0[0-0]       | 0.052 | 0[0-0]        | 0[0-0]        | 0.069 | 0[0-0]        | 0[0-0]        | 0.016 | 0[0-0]        | 0[0-0]        | 0.044 |
| <b>Comorbidities**, N(%)</b>                     |              |              |       |               |               |       |               |               |       |               |               |       |
| Anxiety                                          | 20,097 (12%) | 14,878 (13%) | 0.020 | 132,282 (23%) | 78,442 (16%)  | 0.166 | 83,022 (20%)  | 83,629 (18%)  | 0.046 | 65,306 (14%)  | 88,512 (16%)  | 0.061 |
| Asthma                                           | 15,573 (9%)  | 12,090 (10%) | 0.034 | 119,520 (20%) | 61,821 (13%)  | 0.210 | 68,746 (16%)  | 52,312 (11%)  | 0.149 | 30,811 (7%)   | 46,774 (8%)   | 0.074 |
| Chronic kidney disease                           | 29,343 (17%) | 29,934 (25%) | 0.194 | 15,484 (3%)   | 49,550 (10%)  | 0.311 | 6,676 (2%)    | 8,145 (2%)    | 0.013 | 4,746 (1%)    | 1,376 (0%)    | 0.096 |
| COPD                                             | 14,248 (8%)  | 9,602 (8%)   | 0.012 | 12,247 (2%)   | 39,371 (8%)   | 0.275 | 5,114 (1%)    | 6,699 (1%)    | 0.020 | 3,716 (1%)    | 953 (0%)      | 0.089 |
| Dementia                                         | 6,678 (4%)   | 6,860 (6%)   | 0.086 | 1,986 (0%)    | 6,557 (1%)    | 0.110 | 1,188 (0%)    | 636 (0%)      | 0.032 | 774 (0%)      | 159 (0%)      | 0.044 |
| Depressive disorder                              | 16,339 (10%) | 10,720 (9%)  | 0.021 | 111,568 (19%) | 72,063 (15%)  | 0.115 | 66,705 (16%)  | 77,560 (17%)  | 0.022 | 50,341 (11%)  | 64,215 (12%)  | 0.030 |
| Diabetes                                         | 23,579 (14%) | 17,895 (15%) | 0.033 | 29,125 (5%)   | 66,688 (14%)  | 0.303 | 12,407 (3%)   | 25,465 (6%)   | 0.126 | 9,225 (2%)    | 5,012 (1%)    | 0.089 |
| GERD                                             | 7,610 (5%)   | 6,174 (5%)   | 0.033 | 18,053 (3%)   | 22,884 (5%)   | 0.083 | 8,864 (2%)    | 15,586 (3%)   | 0.076 | 5,920 (1%)    | 8,482 (2%)    | 0.024 |
| Heart failure                                    | 7,475 (4%)   | 7,118 (6%)   | 0.071 | 4,013 (1%)    | 12,939 (3%)   | 0.154 | 1,732 (0%)    | 2,410 (1%)    | 0.016 | 1,274 (0%)    | 293 (0%)      | 0.054 |
| Hypertension                                     | 56,298 (33%) | 44,709 (38%) | 0.093 | 58,662 (10%)  | 139,644 (29%) | 0.485 | 24,457 (6%)   | 64,451 (14%)  | 0.273 | 16,440 (3%)   | 11,991 (2%)   | 0.080 |
| Hypothyroidism                                   | 12,126 (7%)  | 9,825 (8%)   | 0.042 | 22,026 (4%)   | 31,923 (7%)   | 0.126 | 10,616 (3%)   | 19,001 (4%)   | 0.087 | 6,676 (1%)    | 7,790 (1%)    | 0.000 |
| Malignant neoplastic disease                     | 30,687 (18%) | 26,725 (23%) | 0.110 | 19,781 (3%)   | 65,779 (14%)  | 0.370 | 8,870 (2%)    | 19,474 (4%)   | 0.119 | 5,916 (1%)    | 4,164 (1%)    | 0.050 |

|                        | Cohort 1     |              |       | Cohort 2     |             |       | Cohort 3     |            |       | Cohort 4     |            |       |
|------------------------|--------------|--------------|-------|--------------|-------------|-------|--------------|------------|-------|--------------|------------|-------|
|                        | Unvaccinated | Vaccinated   | ASMD  | Unvaccinated | Vaccinated  | ASMD  | Unvaccinated | Vaccinated | ASMD  | Unvaccinated | Vaccinated | ASMD  |
| Myocardial infarction  | 7,707 (5%)   | 6,298 (5%)   | 0.035 | 8,409 (1%)   | 20,200 (4%) | 0.165 | 2,665 (1%)   | 5,556 (1%) | 0.059 | 2,003 (0%)   | 501 (0%)   | 0.066 |
| Osteoporosis           | 12,736 (8%)  | 11,677 (10%) | 0.082 | 5,836 (1%)   | 23,843 (5%) | 0.232 | 2,580 (1%)   | 4,797 (1%) | 0.046 | 1,855 (0%)   | 637 (0%)   | 0.055 |
| Pneumonia              | 5,401 (3%)   | 4,381 (4%)   | 0.028 | 7,250 (1%)   | 12,120 (2%) | 0.092 | 3,822 (1%)   | 4,889 (1%) | 0.014 | 2,522 (1%)   | 2,797 (1%) | 0.004 |
| Rheumatoid arthritis   | 2,565 (2%)   | 1,833 (2%)   | 0.002 | 4,013 (1%)   | 9,000 (2%)  | 0.104 | 1,294 (0%)   | 2,566 (1%) | 0.037 | 877 (0%)     | 316 (0%)   | 0.037 |
| Stroke                 | 7,214 (4%)   | 5,843 (5%)   | 0.032 | 5,886 (1%)   | 14,921 (3%) | 0.146 | 2,170 (1%)   | 3,998 (1%) | 0.042 | 1,591 (0%)   | 620 (0%)   | 0.048 |
| Venous thromboembolism | 6,188 (4%)   | 5,096 (4%)   | 0.033 | 7,342 (1%)   | 14,077 (3%) | 0.115 | 3,067 (1%)   | 6,732 (1%) | 0.069 | 2,611 (1%)   | 1,018 (0%) | 0.061 |

The 4 cohorts represent vaccine rollout periods. \*Calculated as the days of previous observation in the database before index date. \*\*Assessed anytime before index date. ASMD = Absolute standardized mean difference, GP = General practice, PCR = Polymerase chain reaction, COPD = Chronic obstructive pulmonary disease, GERD = Gastro-Esophageal reflux disease



**Table S8: Characteristics of weighted populations in CPRD GOLD, database, stratified by staggered cohort and exposure status. Exposure is ChAdOx1 vaccine.**

|                                                  | Cohort 1     |              |       | Cohort 2     |              |       | Cohort 3     |              |       | Cohort 4     |              |       |
|--------------------------------------------------|--------------|--------------|-------|--------------|--------------|-------|--------------|--------------|-------|--------------|--------------|-------|
|                                                  | Unvaccinated | Vaccinated   | ASMD  |
| <b>N (individuals)</b>                           | 29,163       | 29,082       |       | 82,091       | 82,226       |       | 116,090      | 115,912      |       | 70,312       | 70,823       |       |
| <b>Age, median [Q25-Q75]</b>                     | 82 [79-87]   | 82 [80-87]   | 0.002 | 64 [53-71]   | 64 [53-70]   | 0.001 | 52 [42-58]   | 52 [42-58]   | 0.003 | 42 [39-48]   | 42 [38-48]   | 0.000 |
| <b>Sex: Female, N(%)</b>                         | 17,126 (59%) | 17,076 (59%) | 0.000 | 45,269 (55%) | 45,487 (55%) | 0.003 | 58,599 (50%) | 58,799 (51%) | 0.005 | 29,480 (42%) | 29,458 (42%) | 0.007 |
| <b>Years of prior history*, median [Q25-Q75]</b> | 17 [13-20]   | 17 [14-20]   | 0.001 | 17 [11-19]   | 17 [11-19]   | 0.002 | 17 [9-19]    | 17 [8-19]    | 0.001 | 14 [7-18]    | 14 [6-18]    | 0.001 |
| <b>Number of GP visits, median [Q25-Q75]</b>     | 12 [7-21]    | 12 [8-20]    | 0.005 | 8 [3-16]     | 10 [5-16]    | 0.002 | 4 [0-10]     | 4 [1-10]     | 0.014 | 0 [0-6]      | 2 [0-6]      | 0.003 |
| <b>Number of PCR tests, median [Q25-Q75]</b>     | 0[0-0]       | 0[0-0]       | 0.005 | 0[0-0]       | 0[0-0]       | 0.005 | 0[0-0]       | 0[0-0]       | 0.004 | 0[0-0]       | 0[0-0]       | 0.000 |
| <b>Comorbidities**, N(%)</b>                     |              |              |       |              |              |       |              |              |       |              |              |       |
| Anxiety                                          | 3,481 (12%)  | 3,496 (12%)  | 0.003 | 16,202 (20%) | 15,970 (19%) | 0.008 | 23,083 (20%) | 22,695 (20%) | 0.008 | 12,154 (17%) | 11,947 (17%) | 0.011 |
| Asthma                                           | 2,863 (10%)  | 2,870 (10%)  | 0.002 | 13,358 (16%) | 13,192 (16%) | 0.006 | 16,057 (14%) | 16,029 (14%) | 0.000 | 4,767 (7%)   | 4,744 (7%)   | 0.003 |
| Chronic kidney disease                           | 6,959 (24%)  | 6,928 (24%)  | 0.001 | 5,850 (7%)   | 6,384 (8%)   | 0.024 | 2,031 (2%)   | 2,104 (2%)   | 0.005 | 616 (1%)     | 517 (1%)     | 0.016 |
| COPD                                             | 2,556 (9%)   | 2,485 (9%)   | 0.008 | 5,069 (6%)   | 5,523 (7%)   | 0.022 | 1,969 (2%)   | 1,874 (2%)   | 0.006 | 539 (1%)     | 478 (1%)     | 0.011 |
| Dementia                                         | 2,042 (7%)   | 1,794 (6%)   | 0.034 | 1,319 (2%)   | 826 (1%)     | 0.053 | 263 (0%)     | 265 (0%)     | 0.000 | 59 (0%)      | 111 (0%)     | 0.021 |
| Depressive disorder                              | 2,641 (9%)   | 2,608 (9%)   | 0.003 | 14,875 (18%) | 14,558 (18%) | 0.011 | 20,497 (18%) | 20,298 (18%) | 0.004 | 10,492 (15%) | 10,218 (14%) | 0.014 |
| Diabetes                                         | 4,346 (15%)  | 4,273 (15%)  | 0.006 | 8,933 (11%)  | 9,524 (12%)  | 0.022 | 5,139 (4%)   | 5,350 (5%)   | 0.009 | 1,459 (2%)   | 1,421 (2%)   | 0.005 |
| GERD                                             | 1,366 (5%)   | 1,380 (5%)   | 0.003 | 3,514 (4%)   | 3,414 (4%)   | 0.006 | 3,153 (3%)   | 3,136 (3%)   | 0.001 | 1,258 (2%)   | 1,297 (2%)   | 0.003 |
| Heart failure                                    | 1,844 (6%)   | 1,699 (6%)   | 0.020 | 1,793 (2%)   | 1,720 (2%)   | 0.006 | 613 (1%)     | 601 (1%)     | 0.001 | 177 (0%)     | 151 (0%)     | 0.008 |
| Hypertension                                     | 10,466 (36%) | 10,581 (36%) | 0.010 | 17,843 (22%) | 18,115 (22%) | 0.007 | 10,489 (9%)  | 10,714 (9%)  | 0.007 | 3,119 (4%)   | 3,233 (5%)   | 0.006 |
| Hypothyroidism                                   | 2,338 (8%)   | 2,360 (8%)   | 0.004 | 4,857 (6%)   | 4,837 (6%)   | 0.001 | 3,897 (3%)   | 3,742 (3%)   | 0.007 | 1,432 (2%)   | 1,412 (2%)   | 0.003 |
| Malignant neoplastic disease                     | 6,210 (21%)  | 6,164 (21%)  | 0.002 | 7,090 (9%)   | 8,270 (10%)  | 0.049 | 3,588 (3%)   | 3,590 (3%)   | 0.000 | 1,059 (2%)   | 1,117 (2%)   | 0.006 |
| Myocardial infarction                            | 1,569 (5%)   | 1,500 (5%)   | 0.010 | 2,720 (3%)   | 3,083 (4%)   | 0.024 | 1,155 (1%)   | 1,202 (1%)   | 0.004 | 319 (0%)     | 242 (0%)     | 0.018 |

|                        | Cohort 1     |             |       | Cohort 2     |            |       | Cohort 3     |            |       | Cohort 4     |            |       |
|------------------------|--------------|-------------|-------|--------------|------------|-------|--------------|------------|-------|--------------|------------|-------|
|                        | Unvaccinated | Vaccinated  | ASMD  | Unvaccinated | Vaccinated | ASMD  | Unvaccinated | Vaccinated | ASMD  | Unvaccinated | Vaccinated | ASMD  |
| Osteoporosis           | 2,838 (10%)  | 2,846 (10%) | 0.002 | 2,715 (3%)   | 2,668 (3%) | 0.004 | 944 (1%)     | 986 (1%)   | 0.004 | 252 (0%)     | 281 (0%)   | 0.006 |
| Pneumonia              | 1,287 (4%)   | 1,147 (4%)  | 0.024 | 1,997 (2%)   | 1,883 (2%) | 0.009 | 1,307 (1%)   | 1,245 (1%) | 0.005 | 487 (1%)     | 473 (1%)   | 0.003 |
| Rheumatoid arthritis   | 464 (2%)     | 445 (2%)    | 0.005 | 1,280 (2%)   | 1,491 (2%) | 0.020 | 514 (0%)     | 743 (1%)   | 0.027 | 184 (0%)     | 120 (0%)   | 0.020 |
| Stroke                 | 1,600 (5%)   | 1,421 (5%)  | 0.027 | 2,073 (3%)   | 2,122 (3%) | 0.003 | 873 (1%)     | 963 (1%)   | 0.009 | 263 (0%)     | 257 (0%)   | 0.002 |
| Venous thromboembolism | 1,339 (5%)   | 1,191 (4%)  | 0.024 | 2,112 (3%)   | 2,219 (3%) | 0.008 | 1,407 (1%)   | 1,572 (1%) | 0.013 | 590 (1%)     | 297 (0%)   | 0.053 |

The 4 cohorts represent vaccine rollout periods. \*Calculated as the days of previous observation in the database before index date. \*\*Assessed anytime before index date. ASMD = Absolute standardized mean difference, GP = General practice, PCR = Polymerase chain reaction, COPD = Chronic obstructive pulmonary disease, GERD = Gastro-Esophageal reflux disease

**Table S9: Characteristics of unweighted populations in CPRD GOLD, database, stratified by staggered cohort and exposure status. Exposure is ChAdOx1 vaccine.**

|                                                  | Cohort 1     |              |       | Cohort 2      |               |       | Cohort 3      |               |       | Cohort 4      |              |       |
|--------------------------------------------------|--------------|--------------|-------|---------------|---------------|-------|---------------|---------------|-------|---------------|--------------|-------|
|                                                  | Unvaccinated | Vaccinated   | ASMD  | Unvaccinated  | Vaccinated    | ASMD  | Unvaccinated  | Vaccinated    | ASMD  | Unvaccinated  | Vaccinated   | ASMD  |
| <b>N (individuals)</b>                           | 168,972      | 82,406       |       | 582,791       | 302,999       |       | 418,184       | 423,876       |       | 485,154       | 147,744      |       |
| <b>Age, median [Q25-Q75]</b>                     | 78 [76-82]   | 84 [82-88]   | 0.657 | 45 [33-58]    | 71 [66-76]    | 1.153 | 42 [31-55]    | 56 [52-61]    | 0.560 | 37 [28-49]    | 44 [41-48]   | 0.262 |
| <b>Sex: Female, N(%)</b>                         | 93,648 (55%) | 47,915 (58%) | 0.055 | 344,408 (59%) | 162,753 (54%) | 0.109 | 230,680 (55%) | 210,283 (50%) | 0.111 | 215,080 (44%) | 64,999 (44%) | 0.007 |
| <b>Years of prior history*, median [Q25-Q75]</b> | 17 [13-20]   | 17 [14-20]   | 0.016 | 17 [10-19]    | 17 [13-19]    | 0.090 | 17 [9-19]     | 17 [10-19]    | 0.047 | 13 [6-18]     | 14 [7-18]    | 0.054 |
| <b>Number of GP visits, median [Q25-Q75]</b>     | 11 [6-18]    | 14 [9-21]    | 0.177 | 5 [1-11]      | 11 [7-18]     | 0.451 | 3 [0-8]       | 6 [2-12]      | 0.245 | 0 [0-4]       | 3 [0-7]      | 0.174 |
| <b>Number of PCR tests, median [Q25-Q75]</b>     | 0[0-0]       | 0[0-0]       | 0.053 | 0[0-0]        | 0[0-0]        | 0.074 | 0[0-0]        | 0[0-0]        | 0.018 | 0[0-0]        | 0[0-0]       | 0.029 |
| <b>Comorbidities**, N(%)</b>                     |              |              |       |               |               |       |               |               |       |               |              |       |
| Anxiety                                          | 20,087 (12%) | 9,923 (12%)  | 0.005 | 132,145 (23%) | 49,010 (16%)  | 0.165 | 83,054 (20%)  | 75,258 (18%)  | 0.054 | 66,918 (14%)  | 24,601 (17%) | 0.080 |
| Asthma                                           | 15,567 (9%)  | 8,491 (10%)  | 0.037 | 119,442 (20%) | 39,988 (13%)  | 0.196 | 68,792 (16%)  | 48,034 (11%)  | 0.148 | 31,538 (7%)   | 10,517 (7%)  | 0.025 |
| Chronic kidney disease                           | 29,280 (17%) | 21,564 (26%) | 0.216 | 15,435 (3%)   | 34,168 (11%)  | 0.344 | 6,675 (2%)    | 7,553 (2%)    | 0.014 | 4,947 (1%)    | 739 (1%)     | 0.060 |
| COPD                                             | 14,234 (8%)  | 6,837 (8%)   | 0.005 | 12,242 (2%)   | 27,472 (9%)   | 0.307 | 5,122 (1%)    | 6,334 (1%)    | 0.023 | 3,834 (1%)    | 640 (0%)     | 0.046 |
| Dementia                                         | 6,664 (4%)   | 4,773 (6%)   | 0.086 | 1,998 (0%)    | 5,124 (2%)    | 0.135 | 1,201 (0%)    | 548 (0%)      | 0.035 | 831 (0%)      | 126 (0%)     | 0.024 |
| Depressive disorder                              | 16,333 (10%) | 6,998 (8%)   | 0.041 | 111,526 (19%) | 45,154 (15%)  | 0.113 | 66,763 (16%)  | 70,703 (17%)  | 0.019 | 51,687 (11%)  | 21,711 (15%) | 0.122 |
| Diabetes                                         | 23,547 (14%) | 12,387 (15%) | 0.031 | 29,089 (5%)   | 43,647 (14%)  | 0.322 | 12,392 (3%)   | 24,219 (6%)   | 0.135 | 9,455 (2%)    | 2,254 (2%)   | 0.032 |
| GERD                                             | 7,613 (5%)   | 4,054 (5%)   | 0.020 | 18,044 (3%)   | 14,294 (5%)   | 0.084 | 8,869 (2%)    | 14,447 (3%)   | 0.079 | 6,051 (1%)    | 2,883 (2%)   | 0.056 |
| Heart failure                                    | 7,468 (4%)   | 5,058 (6%)   | 0.077 | 4,016 (1%)    | 9,180 (3%)    | 0.174 | 1,738 (0%)    | 2,308 (1%)    | 0.019 | 1,316 (0%)    | 191 (0%)     | 0.032 |
| Hypertension                                     | 56,262 (33%) | 31,217 (38%) | 0.096 | 58,578 (10%)  | 88,833 (29%)  | 0.499 | 24,450 (6%)   | 59,554 (14%)  | 0.277 | 16,971 (3%)   | 6,761 (5%)   | 0.055 |
| Hypothyroidism                                   | 12,132 (7%)  | 7,042 (9%)   | 0.051 | 21,999 (4%)   | 20,521 (7%)   | 0.134 | 10,622 (3%)   | 17,382 (4%)   | 0.087 | 6,848 (1%)    | 3,245 (2%)   | 0.059 |
| Malignant neoplastic disease                     | 30,670 (18%) | 18,950 (23%) | 0.120 | 19,707 (3%)   | 42,687 (14%)  | 0.386 | 8,893 (2%)    | 17,903 (4%)   | 0.120 | 6,143 (1%)    | 2,192 (1%)   | 0.019 |

|                        | Cohort 1     |             |       | Cohort 2     |             |       | Cohort 3     |            |       | Cohort 4     |            |       |
|------------------------|--------------|-------------|-------|--------------|-------------|-------|--------------|------------|-------|--------------|------------|-------|
|                        | Unvaccinated | Vaccinated  | ASMD  | Unvaccinated | Vaccinated  | ASMD  | Unvaccinated | Vaccinated | ASMD  | Unvaccinated | Vaccinated | ASMD  |
| Myocardial infarction  | 7,704 (5%)   | 4,500 (5%)  | 0.041 | 8,413 (1%)   | 13,456 (4%) | 0.178 | 2,660 (1%)   | 5,280 (1%) | 0.063 | 2,057 (0%)   | 330 (0%)   | 0.035 |
| Osteoporosis           | 12,732 (8%)  | 8,564 (10%) | 0.100 | 5,847 (1%)   | 16,117 (5%) | 0.249 | 2,576 (1%)   | 4,330 (1%) | 0.045 | 1,923 (0%)   | 408 (0%)   | 0.021 |
| Pneumonia              | 5,401 (3%)   | 3,231 (4%)  | 0.039 | 7,241 (1%)   | 8,604 (3%)  | 0.113 | 3,814 (1%)   | 4,527 (1%) | 0.016 | 2,615 (1%)   | 921 (1%)   | 0.011 |
| Rheumatoid arthritis   | 2,559 (2%)   | 1,257 (2%)  | 0.001 | 4,017 (1%)   | 5,999 (2%)  | 0.113 | 1,286 (0%)   | 2,405 (1%) | 0.039 | 918 (0%)     | 191 (0%)   | 0.015 |
| Stroke                 | 7,200 (4%)   | 4,193 (5%)  | 0.039 | 5,885 (1%)   | 10,213 (3%) | 0.162 | 2,167 (1%)   | 3,789 (1%) | 0.045 | 1,625 (0%)   | 369 (0%)   | 0.016 |
| Venous thromboembolism | 6,185 (4%)   | 3,550 (4%)  | 0.033 | 7,335 (1%)   | 9,466 (3%)  | 0.128 | 3,072 (1%)   | 6,339 (1%) | 0.073 | 2,712 (1%)   | 460 (0%)   | 0.038 |

The 4 cohorts represent vaccine rollout periods. \*Calculated as the days of previous observation in the database before index date. \*\*Assessed anytime before index date. ASMD = Absolute standardized mean difference, GP = General practice, PCR = Polymerase chain reaction, COPD = Chronic obstructive pulmonary disease, GERD = Gastro-Esophageal reflux disease

**Table S10: Characteristics of weighted populations in CPRD GOLD, database, stratified by staggered cohort and exposure status. Exposure is BNT162b2 vaccine.**

|                                                  | Cohort 1     |             |       | Cohort 2     |              |       | Cohort 3     |              |       | Cohort 4     |              |       |
|--------------------------------------------------|--------------|-------------|-------|--------------|--------------|-------|--------------|--------------|-------|--------------|--------------|-------|
|                                                  | Unvaccinated | Vaccinated  | ASMD  | Unvaccinated | Vaccinated   | ASMD  | Unvaccinated | Vaccinated   | ASMD  | Unvaccinated | Vaccinated   | ASMD  |
| <b>N (individuals)</b>                           | 15,295       | 15,304      |       | 60,813       | 61,113       |       | 24,008       | 24,157       |       | 151,713      | 152,100      |       |
| <b>Age, median [Q25-Q75]</b>                     | 80 [77-85]   | 80 [77-85]  | 0.000 | 64 [53-70]   | 66 [52-70]   | 0.008 | 52 [44-58]   | 52 [44-58]   | 0.004 | 32 [24-38]   | 32 [24-38]   | 0.003 |
| <b>Sex: Female, N(%)</b>                         | 8,644 (57%)  | 8,657 (57%) | 0.001 | 34,612 (57%) | 34,776 (57%) | 0.000 | 12,846 (54%) | 12,993 (54%) | 0.006 | 66,947 (44%) | 67,555 (44%) | 0.006 |
| <b>Years of prior history*, median [Q25-Q75]</b> | 17 [12-20]   | 18 [12-21]  | 0.001 | 17 [12-19]   | 17 [11-19]   | 0.003 | 17 [11-19]   | 17 [11-19]   | 0.004 | 13 [6-18]    | 14 [5-18]    | 0.001 |
| <b>Number of GP visits, median [Q25-Q75]</b>     | 12 [7-20]    | 12 [8-20]   | 0.001 | 8 [3-15]     | 8 [4-15]     | 0.009 | 4 [0-10]     | 4 [1-10]     | 0.006 | 0 [0-5]      | 2 [0-5]      | 0.007 |
| <b>Number of PCR tests, median [Q25-Q75]</b>     | 0[0-0]       | 0[0-0]      | 0.006 | 0[0-0]       | 0[0-0]       | 0.004 | 0[0-0]       | 0[0-0]       | 0.001 | 0[0-0]       | 0[0-0]       | 0.013 |
| <b>Comorbidities**, N(%)</b>                     |              |             |       |              |              |       |              |              |       |              |              |       |
| Anxiety                                          | 1,969 (13%)  | 1,940 (13%) | 0.006 | 11,790 (19%) | 11,914 (19%) | 0.003 | 5,342 (22%)  | 5,235 (22%)  | 0.014 | 24,455 (16%) | 23,928 (16%) | 0.011 |
| Asthma                                           | 1,498 (10%)  | 1,488 (10%) | 0.002 | 9,126 (15%)  | 9,093 (15%)  | 0.004 | 2,926 (12%)  | 2,985 (12%)  | 0.005 | 12,195 (8%)  | 11,929 (8%)  | 0.007 |
| Chronic kidney disease                           | 3,112 (20%)  | 3,057 (20%) | 0.009 | 3,563 (6%)   | 3,764 (6%)   | 0.013 | 398 (2%)     | 407 (2%)     | 0.002 | 468 (0%)     | 346 (0%)     | 0.016 |
| COPD                                             | 1,190 (8%)   | 1,151 (8%)  | 0.010 | 3,222 (5%)   | 3,237 (5%)   | 0.000 | 293 (1%)     | 274 (1%)     | 0.008 | 315 (0%)     | 250 (0%)     | 0.010 |
| Dementia                                         | 1,087 (7%)   | 864 (6%)    | 0.060 | 646 (1%)     | 355 (1%)     | 0.053 | 55 (0%)      | 80 (0%)      | 0.019 | 21 (0%)      | 28 (0%)      | 0.004 |
| Depressive disorder                              | 1,527 (10%)  | 1,496 (10%) | 0.007 | 10,709 (18%) | 10,912 (18%) | 0.006 | 4,382 (18%)  | 4,343 (18%)  | 0.007 | 17,112 (11%) | 16,594 (11%) | 0.012 |
| Diabetes                                         | 2,193 (14%)  | 2,173 (14%) | 0.004 | 6,057 (10%)  | 6,199 (10%)  | 0.006 | 883 (4%)     | 858 (4%)     | 0.007 | 1,609 (1%)   | 1,271 (1%)   | 0.023 |
| GERD                                             | 880 (6%)     | 872 (6%)    | 0.003 | 2,440 (4%)   | 2,505 (4%)   | 0.004 | 659 (3%)     | 706 (3%)     | 0.011 | 1,935 (1%)   | 1,961 (1%)   | 0.001 |
| Heart failure                                    | 857 (6%)     | 748 (5%)    | 0.032 | 1,097 (2%)   | 933 (2%)     | 0.022 | 119 (0%)     | 77 (0%)      | 0.027 | 107 (0%)     | 77 (0%)      | 0.008 |
| Hypertension                                     | 5,338 (35%)  | 5,312 (35%) | 0.004 | 12,828 (21%) | 12,901 (21%) | 0.000 | 2,597 (11%)  | 2,645 (11%)  | 0.004 | 2,260 (1%)   | 2,369 (2%)   | 0.006 |
| Hypothyroidism                                   | 1,129 (7%)   | 1,067 (7%)  | 0.016 | 3,476 (6%)   | 3,416 (6%)   | 0.005 | 935 (4%)     | 954 (4%)     | 0.003 | 1,772 (1%)   | 1,653 (1%)   | 0.008 |
| Malignant neoplastic disease                     | 3,126 (20%)  | 3,097 (20%) | 0.005 | 5,084 (8%)   | 5,529 (9%)   | 0.024 | 864 (4%)     | 922 (4%)     | 0.011 | 877 (1%)     | 902 (1%)     | 0.002 |
| Myocardial infarction                            | 764 (5%)     | 681 (4%)    | 0.026 | 1,797 (3%)   | 1,853 (3%)   | 0.005 | 230 (1%)     | 186 (1%)     | 0.020 | 189 (0%)     | 128 (0%)     | 0.013 |

|                        | Cohort 1     |            |       | Cohort 2     |            |       | Cohort 3     |            |       | Cohort 4     |            |       |
|------------------------|--------------|------------|-------|--------------|------------|-------|--------------|------------|-------|--------------|------------|-------|
|                        | Unvaccinated | Vaccinated | ASMD  |
| Osteoporosis           | 1,312 (9%)   | 1,225 (8%) | 0.021 | 1,775 (3%)   | 1,805 (3%) | 0.002 | 251 (1%)     | 282 (1%)   | 0.012 | 154 (0%)     | 135 (0%)   | 0.004 |
| Pneumonia              | 573 (4%)     | 475 (3%)   | 0.035 | 1,232 (2%)   | 1,107 (2%) | 0.016 | 256 (1%)     | 244 (1%)   | 0.005 | 744 (0%)     | 698 (0%)   | 0.005 |
| Rheumatoid arthritis   | 248 (2%)     | 234 (2%)   | 0.008 | 854 (1%)     | 945 (2%)   | 0.012 | 113 (0%)     | 102 (0%)   | 0.007 | 165 (0%)     | 62 (0%)    | 0.025 |
| Stroke                 | 739 (5%)     | 650 (4%)   | 0.028 | 1,291 (2%)   | 1,297 (2%) | 0.000 | 172 (1%)     | 129 (1%)   | 0.023 | 204 (0%)     | 138 (0%)   | 0.013 |
| Venous thromboembolism | 640 (4%)     | 622 (4%)   | 0.006 | 1,355 (2%)   | 1,347 (2%) | 0.002 | 273 (1%)     | 256 (1%)   | 0.008 | 604 (0%)     | 288 (0%)   | 0.039 |

The 4 cohorts represent vaccine rollout periods. \*Calculated as the days of previous observation in the database before index date. \*\*Assessed anytime before index date. ASMD = Absolute standardized mean difference, GP = General practice, PCR = Polymerase chain reaction, COPD = Chronic obstructive pulmonary disease, GERD = Gastro-Esophageal reflux disease

**Table S11: Characteristics of unweighted populations in CPRD GOLD, database, stratified by staggered cohort and exposure status. Exposure is BNT162b2 vaccine.**

|                                                  | Cohort 1     |              |       | Cohort 2      |              |       | Cohort 3      |              |       | Cohort 4      |               |       |
|--------------------------------------------------|--------------|--------------|-------|---------------|--------------|-------|---------------|--------------|-------|---------------|---------------|-------|
|                                                  | Unvaccinated | Vaccinated   | ASMD  | Unvaccinated  | Vaccinated   | ASMD  | Unvaccinated  | Vaccinated   | ASMD  | Unvaccinated  | Vaccinated    | ASMD  |
| <b>N (individuals)</b>                           | 169,459      | 32,755       |       | 584,309       | 180,670      |       | 416,549       | 36,748       |       | 465,326       | 365,096       |       |
| <b>Age, median [Q25-Q75]</b>                     | 78 [76-82]   | 81 [79-86]   | 0.306 | 45 [33-58]    | 70 [66-74]   | 1.059 | 42 [31-55]    | 54 [50-60]   | 0.407 | 37 [28-49]    | 31 [24-37]    | 0.445 |
| <b>Sex: Female, N(%)</b>                         | 93,939 (55%) | 18,415 (56%) | 0.016 | 345,249 (59%) | 97,747 (54%) | 0.101 | 229,807 (55%) | 19,649 (53%) | 0.034 | 206,080 (44%) | 167,510 (46%) | 0.032 |
| <b>Years of prior history*, median [Q25-Q75]</b> | 17 [13-20]   | 18 [13-21]   | 0.017 | 17 [10-19]    | 17 [12-19]   | 0.076 | 17 [9-19]     | 18 [12-20]   | 0.153 | 13 [6-18]     | 15 [6-18]     | 0.018 |
| <b>Number of GP visits, median [Q25-Q75]</b>     | 11 [6-18]    | 14 [9-21]    | 0.172 | 5 [1-11]      | 10 [6-16]    | 0.348 | 3 [0-8]       | 6 [2-11]     | 0.183 | 0 [0-4]       | 2 [0-6]       | 0.092 |
| <b>Number of PCR tests, median [Q25-Q75]</b>     | 0[0-0]       | 0[0-0]       | 0.046 | 0[0-0]        | 0[0-0]       | 0.061 | 0[0-0]        | 0[0-0]       | 0.005 | 0[0-0]        | 0[0-0]        | 0.045 |
| <b>Comorbidities**, N(%)</b>                     |              |              |       |               |              |       |               |              |       |               |               |       |
| Anxiety                                          | 20,145 (12%) | 4,336 (13%)  | 0.041 | 132,397 (23%) | 28,697 (16%) | 0.172 | 82,752 (20%)  | 8,004 (22%)  | 0.047 | 64,849 (14%)  | 59,094 (16%)  | 0.063 |
| Asthma                                           | 15,611 (9%)  | 3,250 (10%)  | 0.024 | 119,679 (20%) | 21,396 (12%) | 0.236 | 68,556 (16%)  | 4,053 (11%)  | 0.158 | 30,579 (7%)   | 33,240 (9%)   | 0.094 |
| Chronic kidney disease                           | 29,378 (17%) | 7,430 (23%)  | 0.134 | 15,504 (3%)   | 15,033 (8%)  | 0.251 | 6,636 (2%)    | 566 (2%)     | 0.004 | 4,692 (1%)    | 578 (0%)      | 0.112 |
| COPD                                             | 14,265 (8%)  | 2,417 (7%)   | 0.039 | 12,276 (2%)   | 11,545 (6%)  | 0.214 | 5,085 (1%)    | 348 (1%)     | 0.026 | 3,657 (1%)    | 285 (0%)      | 0.108 |
| Dementia                                         | 6,705 (4%)   | 1,895 (6%)   | 0.085 | 2,008 (0%)    | 1,375 (1%)   | 0.056 | 1,168 (0%)    | 87 (0%)      | 0.009 | 746 (0%)      | 29 (0%)       | 0.053 |
| Depressive disorder                              | 16,385 (10%) | 3,310 (10%)  | 0.015 | 111,708 (19%) | 26,294 (15%) | 0.122 | 66,510 (16%)  | 6,569 (18%)  | 0.051 | 49,969 (11%)  | 39,181 (11%)  | 0.000 |
| Diabetes                                         | 23,614 (14%) | 4,882 (15%)  | 0.028 | 29,200 (5%)   | 22,552 (12%) | 0.267 | 12,338 (3%)   | 1,191 (3%)   | 0.016 | 9,143 (2%)    | 2,507 (1%)    | 0.112 |
| GERD                                             | 7,655 (5%)   | 2,012 (6%)   | 0.072 | 18,069 (3%)   | 8,525 (5%)   | 0.084 | 8,839 (2%)    | 1,093 (3%)   | 0.054 | 5,864 (1%)    | 5,213 (1%)    | 0.015 |
| Heart failure                                    | 7,502 (4%)   | 1,782 (5%)   | 0.047 | 4,026 (1%)    | 3,669 (2%)   | 0.116 | 1,715 (0%)    | 100 (0%)     | 0.024 | 1,236 (0%)    | 98 (0%)       | 0.063 |
| Hypertension                                     | 56,411 (33%) | 11,995 (37%) | 0.070 | 58,749 (10%)  | 49,763 (28%) | 0.459 | 24,301 (6%)   | 4,679 (13%)  | 0.239 | 16,363 (4%)   | 4,776 (1%)    | 0.144 |
| Hypothyroidism                                   | 12,163 (7%)  | 2,373 (7%)   | 0.003 | 22,061 (4%)   | 11,106 (6%)  | 0.109 | 10,565 (3%)   | 1,553 (4%)   | 0.094 | 6,617 (1%)    | 4,180 (1%)    | 0.025 |
| Malignant neoplastic disease                     | 30,728 (18%) | 6,972 (21%)  | 0.079 | 19,832 (3%)   | 22,617 (13%) | 0.342 | 8,827 (2%)    | 1,522 (4%)   | 0.116 | 5,804 (1%)    | 1,796 (0%)    | 0.081 |

|                        | Cohort 1     |            |       | Cohort 2     |            |       | Cohort 3     |            |       | Cohort 4     |            |       |
|------------------------|--------------|------------|-------|--------------|------------|-------|--------------|------------|-------|--------------|------------|-------|
|                        | Unvaccinated | Vaccinated | ASMD  |
| Myocardial infarction  | 7,716 (5%)   | 1,603 (5%) | 0.016 | 8,437 (1%)   | 6,621 (4%) | 0.141 | 2,644 (1%)   | 271 (1%)   | 0.012 | 1,985 (0%)   | 154 (0%)   | 0.080 |
| Osteoporosis           | 12,776 (8%)  | 2,770 (8%) | 0.034 | 5,867 (1%)   | 7,531 (4%) | 0.200 | 2,558 (1%)   | 458 (1%)   | 0.066 | 1,841 (0%)   | 205 (0%)   | 0.072 |
| Pneumonia              | 5,415 (3%)   | 1,032 (3%) | 0.003 | 7,266 (1%)   | 3,418 (2%) | 0.052 | 3,790 (1%)   | 345 (1%)   | 0.003 | 2,512 (1%)   | 1,696 (0%) | 0.011 |
| Rheumatoid arthritis   | 2,566 (2%)   | 512 (2%)   | 0.004 | 4,018 (1%)   | 2,929 (2%) | 0.087 | 1,276 (0%)   | 154 (0%)   | 0.019 | 881 (0%)     | 111 (0%)   | 0.048 |
| Stroke                 | 7,203 (4%)   | 1,490 (5%) | 0.015 | 5,907 (1%)   | 4,632 (3%) | 0.117 | 2,152 (1%)   | 199 (1%)   | 0.003 | 1,578 (0%)   | 225 (0%)   | 0.062 |
| Venous thromboembolism | 6,198 (4%)   | 1,389 (4%) | 0.030 | 7,333 (1%)   | 4,490 (2%) | 0.091 | 3,056 (1%)   | 370 (1%)   | 0.029 | 2,585 (1%)   | 496 (0%)   | 0.072 |

The 4 cohorts represent vaccine rollout periods. \*Calculated as the days of previous observation in the database before index date. \*\*Assessed anytime before index date. ASMD = Absolute standardized mean difference, GP = General practice, PCR = Polymerase chain reaction, COPD = Chronic obstructive pulmonary disease, GERD = Gastro-Esophageal reflux disease



**Table S12: Characteristics of weighted populations in SIDIAP, database, stratified by staggered cohort and exposure status. Exposure is any COVID-19 vaccine.**

|                                                  | Cohort 1     |              |       | Cohort 2      |               |       | Cohort 3      |               |       | Cohort 4      |               |       |
|--------------------------------------------------|--------------|--------------|-------|---------------|---------------|-------|---------------|---------------|-------|---------------|---------------|-------|
|                                                  | Unvaccinated | Vaccinated   | ASMD  | Unvaccinated  | Vaccinated    | ASMD  | Unvaccinated  | Vaccinated    | ASMD  | Unvaccinated  | Vaccinated    | ASMD  |
| <b>N (individuals)</b>                           | 58,342       | 58,535       |       | 235,543       | 235,780       |       | 344,520       | 342,678       |       | 413,428       | 412,893       |       |
| <b>Age, median [Q25-Q75]</b>                     | 86 [83-89]   | 86 [82-89]   | 0.002 | 68 [63-73]    | 68 [63-74]    | 0.003 | 52 [46-58]    | 52 [46-59]    | 0.000 | 36 [28-44]    | 36 [28-44]    | 0.002 |
| <b>Sex: Female, N(%)</b>                         | 36,115 (62%) | 36,214 (62%) | 0.001 | 128,806 (55%) | 129,053 (55%) | 0.001 | 164,316 (48%) | 163,188 (48%) | 0.001 | 188,426 (46%) | 188,471 (46%) | 0.001 |
| <b>Years of prior history*, median [Q25-Q75]</b> | 15 [15-15]   | 15 [15-15]   | 0.001 | 15 [15-15]    | 15 [15-15]    | 0.000 | 15 [15-15]    | 15 [15-15]    | 0.003 | 15 [13-16]    | 15 [13-16]    | 0.004 |
| <b>Number of GP visits, median [Q25-Q75]</b>     | 8 [3-15]     | 8 [4-15]     | 0.007 | 4 [0-9]       | 4 [1-9]       | 0.014 | 0 [0-6]       | 2 [0-6]       | 0.001 | 0 [0-4]       | 0 [0-5]       | 0.014 |
| <b>Number of PCR tests, median [Q25-Q75]</b>     | 0[0-0]       | 0[0-0]       | 0.006 | 0[0-0]        | 0[0-0]        | 0.002 | 0[0-0]        | 0[0-0]        | 0.004 | 0[0-0]        | 0[0-0]        | 0.009 |
| <b>Comorbidities**, N(%)</b>                     |              |              |       |               |               |       |               |               |       |               |               |       |
| Anxiety                                          | 11,384 (20%) | 11,467 (20%) | 0.002 | 52,314 (22%)  | 52,262 (22%)  | 0.001 | 81,514 (24%)  | 80,775 (24%)  | 0.002 | 84,856 (21%)  | 83,145 (20%)  | 0.010 |
| Asthma                                           | 3,708 (6%)   | 3,627 (6%)   | 0.007 | 10,973 (5%)   | 10,703 (5%)   | 0.006 | 14,915 (4%)   | 14,492 (4%)   | 0.005 | 19,969 (5%)   | 19,628 (5%)   | 0.004 |
| Chronic kidney disease                           | 18,755 (32%) | 18,803 (32%) | 0.001 | 21,147 (9%)   | 21,249 (9%)   | 0.001 | 7,411 (2%)    | 7,335 (2%)    | 0.001 | 3,293 (1%)    | 2,846 (1%)    | 0.012 |
| COPD                                             | 7,008 (12%)  | 6,983 (12%)  | 0.002 | 17,160 (7%)   | 16,784 (7%)   | 0.006 | 8,852 (3%)    | 8,622 (3%)    | 0.003 | 3,210 (1%)    | 3,215 (1%)    | 0.000 |
| Dementia                                         | 5,686 (10%)  | 5,812 (10%)  | 0.006 | 4,628 (2%)    | 4,425 (2%)    | 0.006 | 1,247 (0%)    | 1,229 (0%)    | 0.001 | 673 (0%)      | 689 (0%)      | 0.001 |
| Depressive disorder                              | 10,960 (19%) | 11,020 (19%) | 0.001 | 34,232 (15%)  | 34,571 (15%)  | 0.004 | 34,243 (10%)  | 32,427 (9%)   | 0.016 | 23,679 (6%)   | 23,024 (6%)   | 0.007 |
| Diabetes                                         | 14,529 (25%) | 14,269 (24%) | 0.012 | 39,335 (17%)  | 39,133 (17%)  | 0.003 | 25,964 (8%)   | 26,135 (8%)   | 0.003 | 14,136 (3%)   | 14,091 (3%)   | 0.000 |
| GERD                                             | 6,898 (12%)  | 6,871 (12%)  | 0.003 | 21,088 (9%)   | 21,212 (9%)   | 0.002 | 16,959 (5%)   | 17,024 (5%)   | 0.002 | 10,569 (3%)   | 10,903 (3%)   | 0.005 |
| Heart failure                                    | 9,320 (16%)  | 9,141 (16%)  | 0.010 | 10,251 (4%)   | 10,196 (4%)   | 0.001 | 4,001 (1%)    | 3,743 (1%)    | 0.007 | 1,606 (0%)    | 1,565 (0%)    | 0.002 |
| Hypertension                                     | 38,140 (65%) | 37,917 (65%) | 0.013 | 96,384 (41%)  | 96,118 (41%)  | 0.003 | 58,596 (17%)  | 57,241 (17%)  | 0.008 | 22,160 (5%)   | 22,739 (6%)   | 0.006 |
| Hypothyroidism                                   | 7,350 (13%)  | 7,236 (12%)  | 0.007 | 24,054 (10%)  | 24,260 (10%)  | 0.003 | 21,956 (6%)   | 21,573 (6%)   | 0.003 | 17,452 (4%)   | 17,758 (4%)   | 0.004 |
| Malignant neoplastic disease                     | 15,402 (26%) | 15,230 (26%) | 0.009 | 37,052 (16%)  | 38,490 (16%)  | 0.016 | 19,765 (6%)   | 19,599 (6%)   | 0.001 | 9,413 (2%)    | 8,865 (2%)    | 0.009 |

|                        | Cohort 1     |             |       | Cohort 2     |             |       | Cohort 3     |             |       | Cohort 4     |             |       |
|------------------------|--------------|-------------|-------|--------------|-------------|-------|--------------|-------------|-------|--------------|-------------|-------|
|                        | Unvaccinated | Vaccinated  | ASMD  |
| Myocardial infarction  | 2,258 (4%)   | 2,235 (4%)  | 0.003 | 5,972 (3%)   | 5,812 (2%)  | 0.005 | 3,615 (1%)   | 3,448 (1%)  | 0.004 | 1,362 (0%)   | 1,364 (0%)  | 0.000 |
| Osteoporosis           | 9,270 (16%)  | 9,151 (16%) | 0.007 | 18,870 (8%)  | 19,036 (8%) | 0.002 | 7,126 (2%)   | 7,039 (2%)  | 0.001 | 2,254 (1%)   | 2,040 (0%)  | 0.007 |
| Pneumonia              | 6,643 (11%)  | 6,563 (11%) | 0.005 | 15,630 (7%)  | 15,557 (7%) | 0.002 | 14,821 (4%)  | 14,580 (4%) | 0.002 | 14,171 (3%)  | 14,083 (3%) | 0.001 |
| Rheumatoid arthritis   | 765 (1%)     | 727 (1%)    | 0.006 | 2,274 (1%)   | 2,286 (1%)  | 0.000 | 1,544 (0%)   | 1,592 (0%)  | 0.002 | 754 (0%)     | 646 (0%)    | 0.006 |
| Stroke                 | 5,119 (9%)   | 5,043 (9%)  | 0.006 | 8,750 (4%)   | 7,706 (3%)  | 0.024 | 4,343 (1%)   | 4,147 (1%)  | 0.005 | 1,828 (0%)   | 1,840 (0%)  | 0.001 |
| Venous thromboembolism | 2,469 (4%)   | 2,418 (4%)  | 0.005 | 4,745 (2%)   | 4,419 (2%)  | 0.010 | 3,365 (1%)   | 2,982 (1%)  | 0.011 | 1,931 (0%)   | 1,777 (0%)  | 0.005 |

The 4 cohorts represent vaccine rollout periods. \*Calculated as the days of previous observation in the database before index date. \*\*Assessed anytime before index date. ASMD = Absolute standardized mean difference, GP = General practice, PCR = Polymerase chain reaction, COPD = Chronic obstructive pulmonary disease, GERD = Gastro-Esophageal reflux disease

**Table S13: Characteristics of unweighted populations in SIDIAP, database, stratified by staggered cohort and exposure status. Exposure is any COVID-19 vaccine.**

|                                                  | Cohort 1      |              |       | Cohort 2      |               |       | Cohort 3      |               |       | Cohort 4      |               |       |
|--------------------------------------------------|---------------|--------------|-------|---------------|---------------|-------|---------------|---------------|-------|---------------|---------------|-------|
|                                                  | Unvaccinated  | Vaccinated   | ASMD  | Unvaccinated  | Vaccinated    | ASMD  | Unvaccinated  | Vaccinated    | ASMD  | Unvaccinated  | Vaccinated    | ASMD  |
| <b>N (individuals)</b>                           | 223,962       | 89,941       |       | 433,151       | 819,590       |       | 869,497       | 954,232       |       | 1,061,634     | 880,950       |       |
| <b>Age, median [Q25-Q75]</b>                     | 85 [82-88]    | 87 [83-90]   | 0.253 | 67 [62-72]    | 72 [65-78]    | 0.391 | 48 [43-57]    | 54 [49-58]    | 0.192 | 38 [28-51]    | 37 [29-43]    | 0.246 |
| <b>Sex: Female, N(%)</b>                         | 136,888 (61%) | 56,235 (63%) | 0.029 | 237,494 (55%) | 443,019 (54%) | 0.016 | 409,207 (47%) | 462,599 (48%) | 0.028 | 488,499 (46%) | 408,555 (46%) | 0.007 |
| <b>Years of prior history*, median [Q25-Q75]</b> | 15 [15-15]    | 15 [15-15]   | 0.051 | 15 [15-15]    | 15 [15-15]    | 0.185 | 15 [15-15]    | 15 [15-15]    | 0.246 | 15 [10-16]    | 15 [15-16]    | 0.195 |
| <b>Number of GP visits, median [Q25-Q75]</b>     | 7 [2-13]      | 10 [5-18]    | 0.251 | 3 [0-8]       | 6 [2-11]      | 0.168 | 1 [0-5]       | 2 [0-7]       | 0.105 | 0 [0-4]       | 2 [0-6]       | 0.060 |
| <b>Number of PCR tests, median [Q25-Q75]</b>     | 0[0-0]        | 0[0-1]       | 0.070 | 0[0-0]        | 0[0-1]        | 0.042 | 0[0-0]        | 0[0-1]        | 0.073 | 0[0-0]        | 0[0-1]        | 0.123 |
| <b>Comorbidities**, N(%)</b>                     |               |              |       |               |               |       |               |               |       |               |               |       |
| Anxiety                                          | 41,908 (19%)  | 18,117 (20%) | 0.036 | 97,857 (23%)  | 181,286 (22%) | 0.011 | 197,922 (23%) | 233,123 (24%) | 0.039 | 203,019 (19%) | 186,562 (21%) | 0.051 |
| Asthma                                           | 13,371 (6%)   | 5,841 (6%)   | 0.022 | 19,809 (5%)   | 41,966 (5%)   | 0.025 | 36,811 (4%)   | 42,221 (4%)   | 0.009 | 45,374 (4%)   | 46,776 (5%)   | 0.049 |
| Chronic kidney disease                           | 63,041 (28%)  | 31,132 (35%) | 0.140 | 32,450 (7%)   | 101,792 (12%) | 0.165 | 22,454 (3%)   | 20,303 (2%)   | 0.030 | 20,368 (2%)   | 5,314 (1%)    | 0.118 |
| COPD                                             | 24,459 (11%)  | 11,292 (13%) | 0.051 | 28,780 (7%)   | 67,795 (8%)   | 0.062 | 19,020 (2%)   | 27,451 (3%)   | 0.044 | 15,415 (1%)   | 5,836 (1%)    | 0.077 |
| Dementia                                         | 16,743 (7%)   | 10,455 (12%) | 0.142 | 7,404 (2%)    | 19,153 (2%)   | 0.045 | 6,009 (1%)    | 2,787 (0%)    | 0.057 | 5,866 (1%)    | 1,310 (0%)    | 0.068 |
| Depressive disorder                              | 38,148 (17%)  | 18,040 (20%) | 0.078 | 61,308 (14%)  | 124,929 (15%) | 0.031 | 77,039 (9%)   | 98,723 (10%)  | 0.050 | 66,864 (6%)   | 49,608 (6%)   | 0.028 |
| Diabetes                                         | 51,964 (23%)  | 22,968 (26%) | 0.054 | 65,572 (15%)  | 155,362 (19%) | 0.102 | 60,254 (7%)   | 78,356 (8%)   | 0.048 | 49,331 (5%)   | 29,768 (3%)   | 0.065 |
| GERD                                             | 25,376 (11%)  | 10,728 (12%) | 0.019 | 34,715 (8%)   | 87,626 (11%)  | 0.092 | 37,828 (4%)   | 53,565 (6%)   | 0.058 | 31,600 (3%)   | 23,657 (3%)   | 0.018 |
| Heart failure                                    | 28,538 (13%)  | 16,202 (18%) | 0.147 | 16,697 (4%)   | 42,924 (5%)   | 0.066 | 11,909 (1%)   | 10,469 (1%)   | 0.025 | 10,738 (1%)   | 2,776 (0%)    | 0.086 |
| Hypertension                                     | 138,631 (62%) | 60,128 (67%) | 0.104 | 157,290 (36%) | 390,610 (48%) | 0.231 | 125,239 (14%) | 188,390 (20%) | 0.142 | 97,835 (9%)   | 43,351 (5%)   | 0.168 |

|                              | Cohort 1     |              |       | Cohort 2     |               |       | Cohort 3     |             |       | Cohort 4     |             |       |
|------------------------------|--------------|--------------|-------|--------------|---------------|-------|--------------|-------------|-------|--------------|-------------|-------|
|                              | Unvaccinated | Vaccinated   | ASMD  | Unvaccinated | Vaccinated    | ASMD  | Unvaccinated | Vaccinated  | ASMD  | Unvaccinated | Vaccinated  | ASMD  |
| Hypothyroidism               | 26,875 (12%) | 11,473 (13%) | 0.023 | 42,245 (10%) | 89,496 (11%)  | 0.038 | 50,396 (6%)  | 64,873 (7%) | 0.041 | 49,279 (5%)  | 38,477 (4%) | 0.013 |
| Malignant neoplastic disease | 54,714 (24%) | 24,173 (27%) | 0.056 | 81,394 (19%) | 151,745 (19%) | 0.007 | 48,971 (6%)  | 59,566 (6%) | 0.026 | 37,755 (4%)  | 18,021 (2%) | 0.092 |
| Myocardial infarction        | 7,886 (4%)   | 3,642 (4%)   | 0.028 | 9,894 (2%)   | 22,773 (3%)   | 0.031 | 7,570 (1%)   | 11,483 (1%) | 0.033 | 6,171 (1%)   | 2,459 (0%)  | 0.046 |
| Osteoporosis                 | 32,239 (14%) | 14,846 (17%) | 0.058 | 29,512 (7%)  | 81,707 (10%)  | 0.114 | 16,393 (2%)  | 21,679 (2%) | 0.027 | 14,373 (1%)  | 3,343 (0%)  | 0.105 |
| Pneumonia                    | 22,254 (10%) | 10,959 (12%) | 0.072 | 27,837 (6%)  | 61,325 (7%)   | 0.042 | 34,513 (4%)  | 44,236 (5%) | 0.033 | 36,413 (3%)  | 32,657 (4%) | 0.015 |
| Rheumatoid arthritis         | 2,666 (1%)   | 1,204 (1%)   | 0.013 | 3,771 (1%)   | 8,890 (1%)    | 0.022 | 3,239 (0%)   | 4,770 (0%)  | 0.019 | 2,706 (0%)   | 1,281 (0%)  | 0.024 |
| Stroke                       | 16,690 (7%)  | 8,542 (9%)   | 0.073 | 14,256 (3%)  | 32,612 (4%)   | 0.037 | 10,877 (1%)  | 12,068 (1%) | 0.001 | 9,400 (1%)   | 3,384 (0%)  | 0.063 |
| Venous thromboembolism       | 8,014 (4%)   | 4,126 (5%)   | 0.051 | 8,172 (2%)   | 17,846 (2%)   | 0.021 | 7,747 (1%)   | 8,920 (1%)  | 0.005 | 6,632 (1%)   | 3,768 (0%)  | 0.027 |

The 4 cohorts represent vaccine rollout periods. \*Calculated as the days of previous observation in the database before index date. \*\*Assessed anytime before index date. ASMD = Absolute standardized mean difference, GP = General practice, PCR = Polymerase chain reaction, COPD = Chronic obstructive pulmonary disease, GERD = Gastro-Esophageal reflux disease

**Table S14: Characteristics of weighted populations in SIDIAP, database, stratified by staggered cohort and exposure status. Exposure is BNT162b2 vaccine.**

|                                                  | Cohort 1     |              |       | Cohort 2     |              |       | Cohort 3      |               |       | Cohort 4      |               |       |
|--------------------------------------------------|--------------|--------------|-------|--------------|--------------|-------|---------------|---------------|-------|---------------|---------------|-------|
|                                                  | Unvaccinated | Vaccinated   | ASMD  | Unvaccinated | Vaccinated   | ASMD  | Unvaccinated  | Vaccinated    | ASMD  | Unvaccinated  | Vaccinated    | ASMD  |
| <b>N (individuals)</b>                           | 57,981       | 57,843       |       | 99,838       | 99,488       |       | 276,241       | 273,593       |       | 312,492       | 313,346       |       |
| <b>Age, median [Q25-Q75]</b>                     | 86 [83-89]   | 86 [82-89]   | 0.000 | 74 [71-81]   | 74 [72-81]   | 0.006 | 50 [45-56]    | 50 [45-56]    | 0.003 | 36 [29-43]    | 36 [29-43]    | 0.004 |
| <b>Sex: Female, N(%)</b>                         | 35,828 (62%) | 35,895 (62%) | 0.005 | 58,343 (58%) | 57,844 (58%) | 0.006 | 130,375 (47%) | 129,701 (47%) | 0.004 | 145,270 (46%) | 144,384 (46%) | 0.008 |
| <b>Years of prior history*, median [Q25-Q75]</b> | 15 [15-15]   | 15 [15-15]   | 0.002 | 15 [15-15]   | 15 [15-15]   | 0.005 | 15 [15-15]    | 15 [15-15]    | 0.001 | 15 [13-16]    | 15 [14-16]    | 0.004 |
| <b>Number of GP visits, median [Q25-Q75]</b>     | 8 [3-15]     | 8 [4-15]     | 0.008 | 4 [0-10]     | 6 [2-10]     | 0.013 | 0 [0-5]       | 2 [0-6]       | 0.000 | 0 [0-4]       | 0 [0-5]       | 0.012 |
| <b>Number of PCR tests, median [Q25-Q75]</b>     | 0[0-0]       | 0[0-0]       | 0.006 | 0[0-0]       | 0[0-0]       | 0.009 | 0[0-0]        | 0[0-0]        | 0.005 | 0[0-0]        | 0[0-0]        | 0.010 |
| <b>Comorbidities**, N(%)</b>                     |              |              |       |              |              |       |               |               |       |               |               |       |
| Anxiety                                          | 11,327 (20%) | 11,359 (20%) | 0.003 | 20,281 (20%) | 20,181 (20%) | 0.001 | 67,000 (24%)  | 63,263 (23%)  | 0.027 | 65,060 (21%)  | 64,616 (21%)  | 0.005 |
| Asthma                                           | 3,734 (6%)   | 3,583 (6%)   | 0.010 | 5,213 (5%)   | 5,179 (5%)   | 0.001 | 12,220 (4%)   | 11,760 (4%)   | 0.006 | 15,491 (5%)   | 15,211 (5%)   | 0.005 |
| Chronic kidney disease                           | 18,610 (32%) | 18,576 (32%) | 0.000 | 15,548 (16%) | 15,607 (16%) | 0.003 | 5,583 (2%)    | 5,399 (2%)    | 0.003 | 1,999 (1%)    | 2,008 (1%)    | 0.000 |
| COPD                                             | 6,980 (12%)  | 6,907 (12%)  | 0.003 | 9,163 (9%)   | 9,045 (9%)   | 0.003 | 6,020 (2%)    | 6,047 (2%)    | 0.002 | 1,998 (1%)    | 2,000 (1%)    | 0.000 |
| Dementia                                         | 5,678 (10%)  | 5,771 (10%)  | 0.006 | 4,152 (4%)   | 3,716 (4%)   | 0.022 | 1,037 (0%)    | 980 (0%)      | 0.003 | 502 (0%)      | 506 (0%)      | 0.000 |
| Depressive disorder                              | 10,920 (19%) | 10,923 (19%) | 0.001 | 15,653 (16%) | 15,532 (16%) | 0.002 | 26,419 (10%)  | 24,357 (9%)   | 0.023 | 17,262 (6%)   | 17,507 (6%)   | 0.003 |
| Diabetes                                         | 14,416 (25%) | 14,096 (24%) | 0.011 | 20,461 (20%) | 20,645 (21%) | 0.006 | 19,302 (7%)   | 18,543 (7%)   | 0.008 | 10,119 (3%)   | 10,440 (3%)   | 0.005 |
| GERD                                             | 6,784 (12%)  | 6,826 (12%)  | 0.003 | 10,187 (10%) | 10,088 (10%) | 0.002 | 12,811 (5%)   | 12,805 (5%)   | 0.002 | 7,750 (2%)    | 8,224 (3%)    | 0.009 |
| Heart failure                                    | 9,390 (16%)  | 8,983 (16%)  | 0.018 | 7,563 (8%)   | 7,296 (7%)   | 0.009 | 3,044 (1%)    | 2,699 (1%)    | 0.011 | 1,069 (0%)    | 1,049 (0%)    | 0.001 |
| Hypertension                                     | 37,879 (65%) | 37,465 (65%) | 0.012 | 51,262 (51%) | 50,608 (51%) | 0.010 | 42,266 (15%)  | 41,291 (15%)  | 0.006 | 15,063 (5%)   | 15,323 (5%)   | 0.003 |
| Hypothyroidism                                   | 7,310 (13%)  | 7,166 (12%)  | 0.007 | 11,611 (12%) | 11,249 (11%) | 0.010 | 16,597 (6%)   | 16,509 (6%)   | 0.001 | 13,155 (4%)   | 13,617 (4%)   | 0.007 |
| Malignant neoplastic disease                     | 15,302 (26%) | 14,971 (26%) | 0.012 | 19,393 (19%) | 18,719 (19%) | 0.015 | 14,311 (5%)   | 13,981 (5%)   | 0.003 | 6,555 (2%)    | 6,398 (2%)    | 0.004 |
| Myocardial infarction                            | 2,286 (4%)   | 2,182 (4%)   | 0.009 | 3,130 (3%)   | 2,924 (3%)   | 0.011 | 2,569 (1%)    | 2,451 (1%)    | 0.004 | 875 (0%)      | 880 (0%)      | 0.000 |

|                        | Cohort 1     |             |       | Cohort 2     |              |       | Cohort 3     |             |       | Cohort 4     |             |       |
|------------------------|--------------|-------------|-------|--------------|--------------|-------|--------------|-------------|-------|--------------|-------------|-------|
|                        | Unvaccinated | Vaccinated  | ASMD  | Unvaccinated | Vaccinated   | ASMD  | Unvaccinated | Vaccinated  | ASMD  | Unvaccinated | Vaccinated  | ASMD  |
| Osteoporosis           | 9,170 (16%)  | 9,085 (16%) | 0.003 | 11,182 (11%) | 11,201 (11%) | 0.002 | 4,764 (2%)   | 4,639 (2%)  | 0.002 | 1,344 (0%)   | 1,306 (0%)  | 0.002 |
| Pneumonia              | 6,588 (11%)  | 6,476 (11%) | 0.005 | 7,945 (8%)   | 7,918 (8%)   | 0.000 | 11,759 (4%)  | 11,273 (4%) | 0.007 | 10,730 (3%)  | 10,798 (3%) | 0.001 |
| Rheumatoid arthritis   | 755 (1%)     | 718 (1%)    | 0.006 | 1,064 (1%)   | 1,111 (1%)   | 0.005 | 1,113 (0%)   | 1,026 (0%)  | 0.004 | 536 (0%)     | 461 (0%)    | 0.006 |
| Stroke                 | 5,070 (9%)   | 5,006 (9%)  | 0.003 | 5,363 (5%)   | 5,086 (5%)   | 0.012 | 3,121 (1%)   | 3,043 (1%)  | 0.002 | 1,199 (0%)   | 1,253 (0%)  | 0.003 |
| Venous thromboembolism | 2,452 (4%)   | 2,378 (4%)  | 0.006 | 2,660 (3%)   | 2,526 (3%)   | 0.008 | 2,527 (1%)   | 2,211 (1%)  | 0.012 | 1,394 (0%)   | 1,327 (0%)  | 0.003 |

The 4 cohorts represent vaccine rollout periods. \*Calculated as the days of previous observation in the database before index date. \*\*Assessed anytime before index date. ASMD = Absolute standardized mean difference, GP = General practice, PCR = Polymerase chain reaction, COPD = Chronic obstructive pulmonary disease, GERD = Gastro-Esophageal reflux disease

**Table S15: Characteristics of unweighted populations in SIDIAP, database, stratified by staggered cohort and exposure status. Exposure is BNT162b2 vaccine.**

|                                                  | Cohort 1      |              |       | Cohort 2      |               |       | Cohort 3      |               |       | Cohort 4      |               |       |
|--------------------------------------------------|---------------|--------------|-------|---------------|---------------|-------|---------------|---------------|-------|---------------|---------------|-------|
|                                                  | Unvaccinated  | Vaccinated   | ASMD  | Unvaccinated  | Vaccinated    | ASMD  | Unvaccinated  | Vaccinated    | ASMD  | Unvaccinated  | Vaccinated    | ASMD  |
| <b>N (individuals)</b>                           | 223,960       | 88,896       |       | 433,111       | 445,581       |       | 869,109       | 706,435       |       | 1,068,043     | 580,329       |       |
| <b>Age, median [Q25-Q75]</b>                     | 85 [82-88]    | 87 [84-90]   | 0.258 | 67 [62-72]    | 78 [74-83]    | 0.943 | 48 [43-57]    | 53 [48-57]    | 0.127 | 38 [28-51]    | 38 [31-43]    | 0.231 |
| <b>Sex: Female, N(%)</b>                         | 136,891 (61%) | 55,704 (63%) | 0.032 | 237,440 (55%) | 254,378 (57%) | 0.046 | 409,076 (47%) | 341,289 (48%) | 0.025 | 491,528 (46%) | 274,150 (47%) | 0.024 |
| <b>Years of prior history*, median [Q25-Q75]</b> | 15 [15-15]    | 15 [15-15]   | 0.051 | 15 [15-15]    | 15 [15-15]    | 0.206 | 15 [15-15]    | 15 [15-15]    | 0.244 | 15 [10-16]    | 15 [15-16]    | 0.211 |
| <b>Number of GP visits, median [Q25-Q75]</b>     | 7 [2-13]      | 10 [5-18]    | 0.253 | 3 [0-8]       | 7 [3-12]      | 0.247 | 1 [0-5]       | 2 [0-7]       | 0.093 | 0 [0-4]       | 2 [0-6]       | 0.059 |
| <b>Number of PCR tests, median [Q25-Q75]</b>     | 0[0-0]        | 0[0-1]       | 0.067 | 0[0-0]        | 0[0-1]        | 0.019 | 0[0-0]        | 0[0-1]        | 0.074 | 0[0-0]        | 0[0-1]        | 0.121 |
| <b>Comorbidities**, N(%)</b>                     |               |              |       |               |               |       |               |               |       |               |               |       |
| Anxiety                                          | 41,914 (19%)  | 17,962 (20%) | 0.038 | 97,901 (23%)  | 91,620 (21%)  | 0.050 | 197,933 (23%) | 172,434 (24%) | 0.039 | 204,108 (19%) | 125,466 (22%) | 0.062 |
| Asthma                                           | 13,370 (6%)   | 5,796 (7%)   | 0.023 | 19,824 (5%)   | 25,291 (6%)   | 0.050 | 36,788 (4%)   | 31,586 (4%)   | 0.012 | 45,747 (4%)   | 30,865 (5%)   | 0.048 |
| Chronic kidney disease                           | 63,046 (28%)  | 30,745 (35%) | 0.139 | 32,447 (7%)   | 83,968 (19%)  | 0.341 | 22,494 (3%)   | 13,920 (2%)   | 0.041 | 20,416 (2%)   | 3,171 (1%)    | 0.124 |
| COPD                                             | 24,471 (11%)  | 11,169 (13%) | 0.051 | 28,773 (7%)   | 44,207 (10%)  | 0.119 | 19,028 (2%)   | 17,815 (3%)   | 0.022 | 15,424 (1%)   | 3,218 (1%)    | 0.090 |
| Dementia                                         | 16,748 (7%)   | 10,393 (12%) | 0.143 | 7,389 (2%)    | 17,606 (4%)   | 0.136 | 6,003 (1%)    | 2,033 (0%)    | 0.058 | 5,878 (1%)    | 856 (0%)      | 0.068 |
| Depressive disorder                              | 38,161 (17%)  | 17,894 (20%) | 0.079 | 61,309 (14%)  | 72,447 (16%)  | 0.059 | 77,050 (9%)   | 69,517 (10%)  | 0.033 | 67,070 (6%)   | 32,476 (6%)   | 0.029 |
| Diabetes                                         | 51,948 (23%)  | 22,682 (26%) | 0.054 | 65,583 (15%)  | 99,692 (22%)  | 0.186 | 60,242 (7%)   | 53,330 (8%)   | 0.024 | 49,433 (5%)   | 19,502 (3%)   | 0.065 |
| GERD                                             | 25,370 (11%)  | 10,611 (12%) | 0.019 | 34,704 (8%)   | 53,110 (12%)  | 0.131 | 37,842 (4%)   | 37,707 (5%)   | 0.046 | 31,662 (3%)   | 15,544 (3%)   | 0.017 |
| Heart failure                                    | 28,525 (13%)  | 16,041 (18%) | 0.147 | 16,686 (4%)   | 34,932 (8%)   | 0.171 | 11,920 (1%)   | 7,057 (1%)    | 0.034 | 10,734 (1%)   | 1,642 (0%)    | 0.090 |
| Hypertension                                     | 138,655 (62%) | 59,414 (67%) | 0.103 | 157,291 (36%) | 252,365 (57%) | 0.416 | 125,235 (14%) | 128,859 (18%) | 0.104 | 97,944 (9%)   | 26,383 (5%)   | 0.184 |

|                              | Cohort 1     |              |       | Cohort 2     |              |       | Cohort 3     |             |       | Cohort 4     |             |       |
|------------------------------|--------------|--------------|-------|--------------|--------------|-------|--------------|-------------|-------|--------------|-------------|-------|
|                              | Unvaccinated | Vaccinated   | ASMD  | Unvaccinated | Vaccinated   | ASMD  | Unvaccinated | Vaccinated  | ASMD  | Unvaccinated | Vaccinated  | ASMD  |
| Hypothyroidism               | 26,868 (12%) | 11,363 (13%) | 0.024 | 42,216 (10%) | 53,488 (12%) | 0.073 | 50,384 (6%)  | 46,214 (7%) | 0.031 | 49,424 (5%)  | 25,961 (4%) | 0.007 |
| Malignant neoplastic disease | 54,729 (24%) | 23,784 (27%) | 0.053 | 81,399 (19%) | 96,204 (22%) | 0.070 | 48,967 (6%)  | 40,510 (6%) | 0.004 | 37,874 (4%)  | 11,535 (2%) | 0.095 |
| Myocardial infarction        | 7,890 (4%)   | 3,590 (4%)   | 0.027 | 9,892 (2%)   | 14,140 (3%)  | 0.055 | 7,573 (1%)   | 7,753 (1%)  | 0.023 | 6,182 (1%)   | 1,405 (0%)  | 0.053 |
| Osteoporosis                 | 32,250 (14%) | 14,701 (17%) | 0.059 | 29,528 (7%)  | 56,885 (13%) | 0.201 | 16,385 (2%)  | 14,126 (2%) | 0.008 | 14,380 (1%)  | 1,876 (0%)  | 0.113 |
| Pneumonia                    | 22,249 (10%) | 10,811 (12%) | 0.071 | 27,831 (6%)  | 38,127 (9%)  | 0.081 | 34,511 (4%)  | 31,972 (5%) | 0.028 | 36,645 (3%)  | 21,355 (4%) | 0.013 |
| Rheumatoid arthritis         | 2,666 (1%)   | 1,189 (1%)   | 0.013 | 3,769 (1%)   | 5,143 (1%)   | 0.028 | 3,242 (0%)   | 2,843 (0%)  | 0.005 | 2,700 (0%)   | 812 (0%)    | 0.026 |
| Stroke                       | 16,693 (7%)  | 8,475 (10%)  | 0.075 | 14,244 (3%)  | 24,307 (5%)  | 0.106 | 10,868 (1%)  | 8,114 (1%)  | 0.009 | 9,394 (1%)   | 2,033 (0%)  | 0.068 |
| Venous thromboembolism       | 8,023 (4%)   | 4,072 (5%)   | 0.050 | 8,162 (2%)   | 12,564 (3%)  | 0.062 | 7,738 (1%)   | 6,066 (1%)  | 0.003 | 6,658 (1%)   | 2,434 (0%)  | 0.028 |

The 4 cohorts represent vaccine rollout periods. \*Calculated as the days of previous observation in the database before index date. \*\*Assessed anytime before index date. ASMD = Absolute standardized mean difference, GP = General practice, PCR = Polymerase chain reaction, COPD = Chronic obstructive pulmonary disease, GERD = Gastro-Esophageal reflux disease



**Table S16: Characteristics of weighted populations in SIDIAP, database, stratified by staggered cohort and exposure status. Exposure is ChAdOx1 vaccine.**

|                                                  | Cohort 2     |              |       | Cohort 3     |              |       |
|--------------------------------------------------|--------------|--------------|-------|--------------|--------------|-------|
|                                                  | Unvaccinated | Vaccinated   | ASMD  | Unvaccinated | Vaccinated   | ASMD  |
| <b>N (individuals)</b>                           | 120,307      | 120,802      |       | 44,033       | 43,901       |       |
| <b>Age, median [Q25-Q75]</b>                     | 64 [61-66]   | 64 [61-66]   | 0.000 | 64 [61-66]   | 64 [61-67]   | 0.002 |
| <b>Sex: Female, N(%)</b>                         | 62,434 (52%) | 62,425 (52%) | 0.004 | 23,009 (52%) | 22,980 (52%) | 0.002 |
| <b>Years of prior history*, median [Q25-Q75]</b> | 15 [15-15]   | 15 [15-15]   | 0.003 | 15 [15-15]   | 15 [15-15]   | 0.005 |
| <b>Number of GP visits, median [Q25-Q75]</b>     | 2 [0-7]      | 4 [1-8]      | 0.017 | 2 [0-7]      | 2 [0-7]      | 0.003 |
| <b>Number of PCR tests, median [Q25-Q75]</b>     | 0[0-0]       | 0[0-0]       | 0.013 | 0[0-0]       | 0[0-0]       | 0.005 |
| <b>Comorbidities**, N(%)</b>                     |              |              |       |              |              |       |
| Anxiety                                          | 28,213 (23%) | 27,989 (23%) | 0.007 | 10,333 (23%) | 9,717 (22%)  | 0.032 |
| Asthma                                           | 4,909 (4%)   | 4,785 (4%)   | 0.006 | 1,664 (4%)   | 1,639 (4%)   | 0.002 |
| Chronic kidney disease                           | 4,390 (4%)   | 4,526 (4%)   | 0.005 | 1,556 (4%)   | 1,597 (4%)   | 0.006 |
| COPD                                             | 6,702 (6%)   | 6,846 (6%)   | 0.004 | 2,405 (5%)   | 2,350 (5%)   | 0.005 |
| Dementia                                         | 470 (0%)     | 397 (0%)     | 0.010 | 170 (0%)     | 171 (0%)     | 0.000 |
| Depressive disorder                              | 16,483 (14%) | 16,258 (13%) | 0.007 | 5,940 (13%)  | 5,813 (13%)  | 0.007 |
| Diabetes                                         | 16,127 (13%) | 16,418 (14%) | 0.005 | 5,698 (13%)  | 5,705 (13%)  | 0.002 |
| GERD                                             | 9,580 (8%)   | 9,569 (8%)   | 0.002 | 3,206 (7%)   | 3,216 (7%)   | 0.002 |
| Heart failure                                    | 2,268 (2%)   | 2,236 (2%)   | 0.003 | 844 (2%)     | 847 (2%)     | 0.001 |
| Hypertension                                     | 39,422 (33%) | 39,551 (33%) | 0.001 | 13,589 (31%) | 13,737 (31%) | 0.009 |
| Hypothyroidism                                   | 10,965 (9%)  | 11,173 (9%)  | 0.005 | 4,002 (9%)   | 3,830 (9%)   | 0.013 |
| Malignant neoplastic disease                     | 12,621 (10%) | 12,418 (10%) | 0.007 | 4,304 (10%)  | 3,910 (9%)   | 0.030 |
| Myocardial infarction                            | 2,553 (2%)   | 2,500 (2%)   | 0.004 | 888 (2%)     | 868 (2%)     | 0.003 |
| Osteoporosis                                     | 6,687 (6%)   | 6,679 (6%)   | 0.001 | 2,155 (5%)   | 2,200 (5%)   | 0.005 |
| Pneumonia                                        | 6,452 (5%)   | 6,392 (5%)   | 0.003 | 2,243 (5%)   | 2,167 (5%)   | 0.007 |
| Rheumatoid arthritis                             | 1,009 (1%)   | 931 (1%)     | 0.008 | 337 (1%)     | 259 (1%)     | 0.021 |
| Stroke                                           | 2,693 (2%)   | 2,582 (2%)   | 0.007 | 965 (2%)     | 1,000 (2%)   | 0.006 |
| Venous thromboembolism                           | 1,686 (1%)   | 1,469 (1%)   | 0.016 | 659 (1%)     | 541 (1%)     | 0.023 |

The 4 cohorts represent vaccine rollout periods. \*Calculated as the days of previous observation in the database before index date. \*\*Assessed anytime before index date. ASMD = Absolute standardized mean difference, GP = General practice, PCR = Polymerase chain reaction, COPD = Chronic obstructive pulmonary disease, GERD = Gastro-Esophageal reflux disease



**Table S17: Characteristics of unweighted populations in SIDIAP, database, stratified by staggered cohort and exposure status. Exposure is ChAdOx1 vaccine.**

|                                                  | Cohort 2      |               |       | Cohort 3      |              |       |
|--------------------------------------------------|---------------|---------------|-------|---------------|--------------|-------|
|                                                  | Unvaccinated  | Vaccinated    | ASMD  | Unvaccinated  | Vaccinated   | ASMD  |
| <b>N (individuals)</b>                           | 433,636       | 323,204       |       | 873,400       | 84,204       |       |
| <b>Age, median [Q25-Q75]</b>                     | 67 [62-72]    | 64 [62-67]    | 0.241 | 48 [43-57]    | 64 [61-67]   | 0.986 |
| <b>Sex: Female, N(%)</b>                         | 237,722 (55%) | 162,269 (50%) | 0.093 | 411,107 (47%) | 44,374 (53%) | 0.113 |
| <b>Years of prior history*, median [Q25-Q75]</b> | 15 [15-15]    | 15 [15-15]    | 0.158 | 15 [15-15]    | 15 [15-15]   | 0.281 |
| <b>Number of GP visits, median [Q25-Q75]</b>     | 3 [0-8]       | 4 [1-9]       | 0.037 | 1 [0-5]       | 4 [1-8]      | 0.182 |
| <b>Number of PCR tests, median [Q25-Q75]</b>     | 0[0-0]        | 0[0-1]        | 0.047 | 0[0-0]        | 0[0-0]       | 0.029 |
| <b>Comorbidities**, N(%)</b>                     |               |               |       |               |              |       |
| Anxiety                                          | 97,950 (23%)  | 77,793 (24%)  | 0.035 | 198,282 (23%) | 19,626 (23%) | 0.014 |
| Asthma                                           | 19,861 (5%)   | 13,894 (4%)   | 0.014 | 36,915 (4%)   | 3,283 (4%)   | 0.017 |
| Chronic kidney disease                           | 32,497 (7%)   | 12,206 (4%)   | 0.162 | 22,570 (3%)   | 3,199 (4%)   | 0.069 |
| COPD                                             | 28,826 (7%)   | 18,658 (6%)   | 0.036 | 19,103 (2%)   | 4,996 (6%)   | 0.191 |
| Dementia                                         | 7,407 (2%)    | 1,009 (0%)    | 0.140 | 6,041 (1%)    | 345 (0%)     | 0.038 |
| Depressive disorder                              | 61,377 (14%)  | 44,463 (14%)  | 0.011 | 77,249 (9%)   | 11,874 (14%) | 0.166 |
| Diabetes                                         | 65,666 (15%)  | 45,453 (14%)  | 0.031 | 60,383 (7%)   | 12,142 (14%) | 0.245 |
| GERD                                             | 34,755 (8%)   | 28,610 (9%)   | 0.030 | 37,840 (4%)   | 6,754 (8%)   | 0.154 |
| Heart failure                                    | 16,741 (4%)   | 5,636 (2%)    | 0.129 | 11,981 (1%)   | 1,703 (2%)   | 0.050 |
| Hypertension                                     | 157,484 (36%) | 114,179 (35%) | 0.021 | 125,527 (14%) | 28,314 (34%) | 0.463 |
| Hypothyroidism                                   | 42,257 (10%)  | 30,350 (9%)   | 0.012 | 50,476 (6%)   | 7,763 (9%)   | 0.131 |
| Malignant neoplastic disease                     | 81,510 (19%)  | 36,352 (11%)  | 0.212 | 49,066 (6%)   | 7,842 (9%)   | 0.141 |
| Myocardial infarction                            | 9,910 (2%)    | 7,242 (2%)    | 0.003 | 7,561 (1%)    | 1,784 (2%)   | 0.103 |
| Osteoporosis                                     | 29,546 (7%)   | 19,864 (6%)   | 0.027 | 16,434 (2%)   | 4,382 (5%)   | 0.180 |
| Pneumonia                                        | 27,865 (6%)   | 18,329 (6%)   | 0.032 | 34,617 (4%)   | 4,445 (5%)   | 0.063 |
| Rheumatoid arthritis                             | 3,762 (1%)    | 2,557 (1%)    | 0.008 | 3,246 (0%)    | 535 (1%)     | 0.037 |
| Stroke                                           | 14,284 (3%)   | 6,369 (2%)    | 0.083 | 10,884 (1%)   | 1,915 (2%)   | 0.078 |
| Venous thromboembolism                           | 8,163 (2%)    | 3,613 (1%)    | 0.063 | 7,746 (1%)    | 1,110 (1%)   | 0.041 |

The 4 cohorts represent vaccine rollout periods. \*Calculated as the days of previous observation in the database before index date. \*\*Assessed anytime before index date. ASMD = Absolute standardized mean difference, GP = General practice, PCR = Polymerase chain reaction, COPD = Chronic obstructive pulmonary disease, GERD = Gastro-Esophageal reflux disease



**Table S18: Characteristics of weighted populations in CORIVA, database, stratified by staggered cohort and exposure status. Exposure is any COVID-19 vaccine.**

|                                                  | Cohort 1     |             |       | Cohort 2     |             |       | Cohort 3     |             |       | Cohort 4     |             |       |
|--------------------------------------------------|--------------|-------------|-------|--------------|-------------|-------|--------------|-------------|-------|--------------|-------------|-------|
|                                                  | Unvaccinated | Vaccinated  | ASMD  |
| <b>N (individuals)</b>                           | 10,630       | 10,630      |       | 3,863        | 3,863       |       | 17,929       | 17,929      |       | 18,740       | 18,740      |       |
| <b>Age, median [Q25-Q75]</b>                     | 78 [72-83]   | 78 [72-83]  | 0.000 | 70 [65-75]   | 70 [65-75]  | 0.000 | 52 [45-59]   | 50 [45-59]  | 0.000 | 40 [30-51]   | 40 [30-51]  | 0.000 |
| <b>Sex: Female, N(%)</b>                         | 7,165 (67%)  | 7,165 (67%) | 0.000 | 2,439 (63%)  | 2,439 (63%) | 0.000 | 9,054 (50%)  | 9,054 (50%) | 0.000 | 8,493 (45%)  | 8,493 (45%) | 0.000 |
| <b>Years of prior history*, median [Q25-Q75]</b> | 4 [4-4]      | 4 [4-4]     | 0.000 | 4 [4-4]      | 4 [4-4]     | 0.000 | 4 [4-4]      | 4 [4-4]     | 0.000 | 5 [4-5]      | 5 [4-5]     | 0.000 |
| <b>Number of GP visits, median [Q25-Q75]</b>     | 14 [4-24]    | 14 [6-23]   | 0.004 | 12 [3-23]    | 12 [5-22]   | 0.000 | 2 [0-11]     | 4 [1-10]    | 0.002 | 2 [0-8]      | 2 [0-8]     | 0.005 |
| <b>Number of PCR tests, median [Q25-Q75]</b>     | 0[0-0]       | 0[0-0]      | 0.003 | 0[0-0]       | 0[0-0]      | 0.002 | 0[0-0]       | 0[0-0]      | 0.000 | 0[0-0]       | 0[0-0]      | 0.002 |
| <b>Comorbidities**, N(%)</b>                     |              |             |       |              |             |       |              |             |       |              |             |       |
| Anxiety                                          | 1,060 (10%)  | 1,076 (10%) | 0.005 | 405 (10%)    | 415 (11%)   | 0.008 | 1,545 (9%)   | 1,500 (8%)  | 0.009 | 1,552 (8%)   | 1,495 (8%)  | 0.011 |
| Asthma                                           | 996 (9%)     | 917 (9%)    | 0.026 | 372 (10%)    | 365 (9%)    | 0.006 | 936 (5%)     | 894 (5%)    | 0.011 | 845 (5%)     | 782 (4%)    | 0.016 |
| Chronic kidney disease                           | 1,015 (10%)  | 999 (9%)    | 0.005 | 336 (9%)     | 309 (8%)    | 0.025 | 347 (2%)     | 339 (2%)    | 0.003 | 212 (1%)     | 194 (1%)    | 0.009 |
| COPD                                             | 757 (7%)     | 723 (7%)    | 0.012 | 264 (7%)     | 258 (7%)    | 0.006 | 442 (2%)     | 417 (2%)    | 0.009 | 318 (2%)     | 249 (1%)    | 0.030 |
| Dementia                                         | 438 (4%)     | 412 (4%)    | 0.013 | 106 (3%)     | 90 (2%)     | 0.027 | 120 (1%)     | 131 (1%)    | 0.008 | 71 (0%)      | 70 (0%)     | 0.001 |
| Depressive disorder                              | 1,076 (10%)  | 1,083 (10%) | 0.002 | 462 (12%)    | 433 (11%)   | 0.023 | 1,787 (10%)  | 1,764 (10%) | 0.004 | 1,679 (9%)   | 1,739 (9%)  | 0.011 |
| Diabetes                                         | 1,861 (18%)  | 1,833 (17%) | 0.007 | 640 (17%)    | 588 (15%)   | 0.037 | 1,012 (6%)   | 963 (5%)    | 0.012 | 814 (4%)     | 764 (4%)    | 0.014 |
| GERD                                             | 1,416 (13%)  | 1,458 (14%) | 0.011 | 523 (14%)    | 531 (14%)   | 0.006 | 1,562 (9%)   | 1,600 (9%)  | 0.007 | 1,166 (6%)   | 1,172 (6%)  | 0.001 |
| Heart failure                                    | 3,898 (37%)  | 3,839 (36%) | 0.011 | 1,003 (26%)  | 970 (25%)   | 0.020 | 1,348 (8%)   | 1,324 (7%)  | 0.005 | 781 (4%)     | 737 (4%)    | 0.012 |
| Hypertension                                     | 8,016 (75%)  | 8,221 (77%) | 0.045 | 2,569 (67%)  | 2,641 (68%) | 0.040 | 5,521 (31%)  | 5,643 (31%) | 0.015 | 3,359 (18%)  | 3,538 (19%) | 0.025 |
| Hypothyroidism                                   | 1,218 (11%)  | 1,160 (11%) | 0.017 | 419 (11%)    | 428 (11%)   | 0.007 | 981 (5%)     | 948 (5%)    | 0.008 | 654 (3%)     | 675 (4%)    | 0.006 |
| Malignant neoplastic disease                     | 1,655 (16%)  | 1,732 (16%) | 0.020 | 640 (17%)    | 659 (17%)   | 0.013 | 771 (4%)     | 782 (4%)    | 0.003 | 455 (2%)     | 453 (2%)    | 0.001 |
| Myocardial infarction                            | 269 (3%)     | 264 (2%)    | 0.003 | 86 (2%)      | 71 (2%)     | 0.026 | 127 (1%)     | 116 (1%)    | 0.008 | 81 (0%)      | 75 (0%)     | 0.005 |
| Osteoporosis                                     | 675 (6%)     | 685 (6%)    | 0.004 | 187 (5%)     | 176 (5%)    | 0.013 | 233 (1%)     | 230 (1%)    | 0.001 | 131 (1%)     | 146 (1%)    | 0.009 |
| Pneumonia                                        | 771 (7%)     | 768 (7%)    | 0.001 | 249 (6%)     | 244 (6%)    | 0.005 | 657 (4%)     | 670 (4%)    | 0.004 | 567 (3%)     | 562 (3%)    | 0.002 |
| Rheumatoid arthritis                             | 268 (3%)     | 273 (3%)    | 0.003 | 139 (4%)     | 122 (3%)    | 0.024 | 209 (1%)     | 187 (1%)    | 0.012 | 130 (1%)     | 116 (1%)    | 0.009 |

|                        | Cohort 1     |            |       | Cohort 2     |            |       | Cohort 3     |            |       | Cohort 4     |            |       |
|------------------------|--------------|------------|-------|--------------|------------|-------|--------------|------------|-------|--------------|------------|-------|
|                        | Unvaccinated | Vaccinated | ASMD  |
| Stroke                 | 460 (4%)     | 461 (4%)   | 0.001 | 147 (4%)     | 144 (4%)   | 0.004 | 179 (1%)     | 189 (1%)   | 0.006 | 112 (1%)     | 116 (1%)   | 0.003 |
| Venous thromboembolism | 469 (4%)     | 472 (4%)   | 0.001 | 171 (4%)     | 123 (3%)   | 0.064 | 306 (2%)     | 301 (2%)   | 0.002 | 219 (1%)     | 201 (1%)   | 0.009 |

The 4 cohorts represent vaccine rollout periods. \*Calculated as the days of previous observation in the database before index date. \*\*Assessed anytime before index date. ASMD = Absolute standardized mean difference, GP = General practice, PCR = Polymerase chain reaction, COPD = Chronic obstructive pulmonary disease, GERD = Gastro-Esophageal reflux disease

**Table S19: Characteristics of unweighted populations in CORIVA, database, stratified by staggered cohort and exposure status. Exposure is any COVID-19 vaccine.**

|                                                  | Cohort 1     |              |       | Cohort 2     |             |       | Cohort 3     |              |       | Cohort 4     |              |       |
|--------------------------------------------------|--------------|--------------|-------|--------------|-------------|-------|--------------|--------------|-------|--------------|--------------|-------|
|                                                  | Unvaccinated | Vaccinated   | ASMD  | Unvaccinated | Vaccinated  | ASMD  | Unvaccinated | Vaccinated   | ASMD  | Unvaccinated | Vaccinated   | ASMD  |
| <b>N (individuals)</b>                           | 23,982       | 26,736       |       | 34,317       | 4,572       |       | 96,423       | 24,050       |       | 147,545      | 22,245       |       |
| <b>Age, median [Q25-Q75]</b>                     | 79 [73-85]   | 77 [73-82]   | 0.127 | 72 [67-81]   | 70 [66-75]  | 0.177 | 54 [46-66]   | 51 [45-59]   | 0.227 | 42 [32-58]   | 40 [30-51]   | 0.186 |
| <b>Sex: Female, N(%)</b>                         | 16,532 (69%) | 17,342 (65%) | 0.087 | 21,862 (64%) | 2,891 (63%) | 0.010 | 48,984 (51%) | 12,233 (51%) | 0.001 | 72,057 (49%) | 10,026 (45%) | 0.076 |
| <b>Years of prior history*, median [Q25-Q75]</b> | 4 [4-4]      | 4 [4-4]      | 0.019 | 4 [4-4]      | 4 [4-4]     | 0.002 | 4 [4-4]      | 4 [4-4]      | 0.002 | 5 [4-5]      | 5 [4-5]      | 0.003 |
| <b>Number of GP visits, median [Q25-Q75]</b>     | 11 [1-22]    | 16 [8-26]    | 0.216 | 9 [1-20]     | 13 [6-23]   | 0.147 | 2 [0-10]     | 5 [1-11]     | 0.088 | 1 [0-6]      | 3 [1-8]      | 0.106 |
| <b>Number of PCR tests, median [Q25-Q75]</b>     | 0[0-0]       | 0[0-0]       | 0.029 | 0[0-0]       | 0[0-0]      | 0.027 | 0[0-0]       | 0[0-0]       | 0.008 | 0[0-0]       | 0[0-0]       | 0.035 |
| <b>Comorbidities**, N(%)</b>                     |              |              |       |              |             |       |              |              |       |              |              |       |
| Anxiety                                          | 1,966 (8%)   | 3,238 (12%)  | 0.130 | 2,817 (8%)   | 513 (11%)   | 0.102 | 6,406 (7%)   | 2,162 (9%)   | 0.087 | 9,287 (6%)   | 1,847 (8%)   | 0.077 |
| Asthma                                           | 1,986 (8%)   | 2,668 (10%)  | 0.059 | 2,653 (8%)   | 447 (10%)   | 0.072 | 4,385 (5%)   | 1,250 (5%)   | 0.030 | 5,405 (4%)   | 968 (4%)     | 0.035 |
| Chronic kidney disease                           | 2,270 (9%)   | 2,507 (9%)   | 0.003 | 2,939 (9%)   | 367 (8%)    | 0.019 | 2,523 (3%)   | 415 (2%)     | 0.061 | 2,335 (2%)   | 221 (1%)     | 0.052 |
| COPD                                             | 1,569 (7%)   | 1,976 (7%)   | 0.033 | 2,015 (6%)   | 312 (7%)    | 0.039 | 2,743 (3%)   | 529 (2%)     | 0.041 | 2,558 (2%)   | 294 (1%)     | 0.034 |
| Dementia                                         | 1,152 (5%)   | 819 (3%)     | 0.090 | 1,297 (4%)   | 100 (2%)    | 0.094 | 1,147 (1%)   | 151 (1%)     | 0.059 | 1,067 (1%)   | 76 (0%)      | 0.052 |
| Depressive disorder                              | 2,066 (9%)   | 3,233 (12%)  | 0.114 | 3,189 (9%)   | 535 (12%)   | 0.079 | 7,286 (8%)   | 2,561 (11%)  | 0.108 | 10,034 (7%)  | 2,152 (10%)  | 0.105 |
| Diabetes                                         | 3,971 (17%)  | 4,734 (18%)  | 0.030 | 4,818 (14%)  | 712 (16%)   | 0.043 | 6,065 (6%)   | 1,228 (5%)   | 0.051 | 6,594 (4%)   | 901 (4%)     | 0.021 |
| GERD                                             | 2,533 (11%)  | 4,585 (17%)  | 0.192 | 3,364 (10%)  | 667 (15%)   | 0.147 | 6,287 (7%)   | 2,322 (10%)  | 0.115 | 7,455 (5%)   | 1,427 (6%)   | 0.059 |
| Heart failure                                    | 8,724 (36%)  | 9,642 (36%)  | 0.007 | 9,570 (28%)  | 1,139 (25%) | 0.068 | 9,982 (10%)  | 1,607 (7%)   | 0.132 | 9,182 (6%)   | 828 (4%)     | 0.115 |
| Hypertension                                     | 16,651 (69%) | 21,677 (81%) | 0.272 | 20,654 (60%) | 3,167 (69%) | 0.191 | 29,974 (31%) | 7,555 (31%)  | 0.007 | 27,992 (19%) | 4,172 (19%)  | 0.006 |
| Hypothyroidism                                   | 2,496 (10%)  | 3,094 (12%)  | 0.037 | 3,198 (9%)   | 515 (11%)   | 0.064 | 4,725 (5%)   | 1,309 (5%)   | 0.025 | 5,180 (4%)   | 799 (4%)     | 0.004 |
| Malignant neoplastic disease                     | 3,194 (13%)  | 5,044 (19%)  | 0.151 | 5,061 (15%)  | 782 (17%)   | 0.064 | 4,587 (5%)   | 1,011 (4%)   | 0.027 | 4,134 (3%)   | 523 (2%)     | 0.028 |
| Myocardial infarction                            | 548 (2%)     | 743 (3%)     | 0.031 | 696 (2%)     | 86 (2%)     | 0.011 | 840 (1%)     | 146 (1%)     | 0.031 | 777 (1%)     | 87 (0%)      | 0.020 |
| Osteoporosis                                     | 1,273 (5%)   | 2,015 (8%)   | 0.091 | 1,446 (4%)   | 212 (5%)    | 0.021 | 1,545 (2%)   | 289 (1%)     | 0.034 | 1,408 (1%)   | 164 (1%)     | 0.024 |
| Pneumonia                                        | 1,611 (7%)   | 2,046 (8%)   | 0.036 | 2,081 (6%)   | 291 (6%)    | 0.012 | 3,342 (3%)   | 898 (4%)     | 0.014 | 3,919 (3%)   | 683 (3%)     | 0.025 |

|                        | Cohort 1     |            |       | Cohort 2     |            |       | Cohort 3     |            |       | Cohort 4     |            |       |
|------------------------|--------------|------------|-------|--------------|------------|-------|--------------|------------|-------|--------------|------------|-------|
|                        | Unvaccinated | Vaccinated | ASMD  |
| Rheumatoid arthritis   | 493 (2%)     | 817 (3%)   | 0.063 | 891 (3%)     | 153 (3%)   | 0.044 | 1,022 (1%)   | 250 (1%)   | 0.002 | 987 (1%)     | 137 (1%)   | 0.007 |
| Stroke                 | 1,137 (5%)   | 1,011 (4%) | 0.048 | 1,450 (4%)   | 169 (4%)   | 0.027 | 1,359 (1%)   | 232 (1%)   | 0.041 | 1,256 (1%)   | 133 (1%)   | 0.030 |
| Venous thromboembolism | 1,058 (4%)   | 1,207 (5%) | 0.005 | 1,349 (4%)   | 149 (3%)   | 0.036 | 1,808 (2%)   | 387 (2%)   | 0.020 | 1,788 (1%)   | 235 (1%)   | 0.015 |

The 4 cohorts represent vaccine rollout periods. \*Calculated as the days of previous observation in the database before index date. \*\*Assessed anytime before index date. ASMD = Absolute standardized mean difference, GP = General practice, PCR = Polymerase chain reaction, COPD = Chronic obstructive pulmonary disease, GERD = Gastro-Esophageal reflux disease



**Table S20: Characteristics of weighted populations in CORIVA, database, stratified by staggered cohort and exposure status. Exposure is BNT162b2 vaccine.**

|                                                  | Cohort 1     |             |       | Cohort 2     |             |       | Cohort 3     |             |       | Cohort 4     |             |       |
|--------------------------------------------------|--------------|-------------|-------|--------------|-------------|-------|--------------|-------------|-------|--------------|-------------|-------|
|                                                  | Unvaccinated | Vaccinated  | ASMD  |
| <b>N (individuals)</b>                           | 9,118        | 9,118       |       | 3,465        | 3,465       |       | 14,414       | 14,414      |       | 13,759       | 13,759      |       |
| <b>Age, median [Q25-Q75]</b>                     | 78 [73-83]   | 78 [73-83]  | 0.000 | 70 [65-75]   | 70 [65-75]  | 0.000 | 50 [45-59]   | 50 [45-59]  | 0.000 | 38 [30-50]   | 38 [30-50]  | 0.000 |
| <b>Sex: Female, N(%)</b>                         | 6,206 (68%)  | 6,206 (68%) | 0.000 | 2,197 (63%)  | 2,197 (63%) | 0.000 | 7,324 (51%)  | 7,324 (51%) | 0.000 | 6,552 (48%)  | 6,552 (48%) | 0.000 |
| <b>Years of prior history*, median [Q25-Q75]</b> | 4 [4-4]      | 4 [4-4]     | 0.000 | 4 [4-4]      | 4 [4-4]     | 0.000 | 4 [4-4]      | 4 [4-4]     | 0.000 | 5 [4-5]      | 5 [4-5]     | 0.000 |
| <b>Number of GP visits, median [Q25-Q75]</b>     | 14 [4-25]    | 14 [7-24]   | 0.004 | 12 [3-23]    | 12 [5-22]   | 0.000 | 2 [0-10]     | 4 [1-10]    | 0.002 | 2 [0-8]      | 2 [0-8]     | 0.004 |
| <b>Number of PCR tests, median [Q25-Q75]</b>     | 0[0-0]       | 0[0-0]      | 0.002 | 0[0-0]       | 0[0-0]      | 0.003 | 0[0-0]       | 0[0-0]      | 0.000 | 0[0-0]       | 0[0-0]      | 0.001 |
| <b>Comorbidities**, N(%)</b>                     |              |             |       |              |             |       |              |             |       |              |             |       |
| Anxiety                                          | 935 (10%)    | 956 (10%)   | 0.007 | 367 (11%)    | 373 (11%)   | 0.006 | 1,284 (9%)   | 1,278 (9%)  | 0.001 | 1,206 (9%)   | 1,170 (9%)  | 0.009 |
| Asthma                                           | 891 (10%)    | 822 (9%)    | 0.026 | 340 (10%)    | 333 (10%)   | 0.007 | 747 (5%)     | 718 (5%)    | 0.009 | 644 (5%)     | 615 (4%)    | 0.010 |
| Chronic kidney disease                           | 939 (10%)    | 905 (10%)   | 0.012 | 302 (9%)     | 278 (8%)    | 0.025 | 225 (2%)     | 220 (2%)    | 0.003 | 144 (1%)     | 132 (1%)    | 0.008 |
| COPD                                             | 666 (7%)     | 639 (7%)    | 0.011 | 238 (7%)     | 227 (7%)    | 0.013 | 333 (2%)     | 316 (2%)    | 0.008 | 223 (2%)     | 171 (1%)    | 0.032 |
| Dementia                                         | 403 (4%)     | 377 (4%)    | 0.014 | 91 (3%)      | 81 (2%)     | 0.018 | 75 (1%)      | 72 (0%)     | 0.002 | 46 (0%)      | 38 (0%)     | 0.012 |
| Depressive disorder                              | 960 (11%)    | 966 (11%)   | 0.002 | 420 (12%)    | 411 (12%)   | 0.008 | 1,472 (10%)  | 1,485 (10%) | 0.003 | 1,311 (10%)  | 1,367 (10%) | 0.014 |
| Diabetes                                         | 1,647 (18%)  | 1,624 (18%) | 0.007 | 576 (17%)    | 531 (15%)   | 0.036 | 747 (5%)     | 731 (5%)    | 0.005 | 596 (4%)     | 565 (4%)    | 0.011 |
| GERD                                             | 1,240 (14%)  | 1,268 (14%) | 0.009 | 476 (14%)    | 473 (14%)   | 0.003 | 1,283 (9%)   | 1,322 (9%)  | 0.009 | 892 (6%)     | 900 (7%)    | 0.002 |
| Heart failure                                    | 3,527 (39%)  | 3,470 (38%) | 0.013 | 911 (26%)    | 877 (25%)   | 0.022 | 920 (6%)     | 899 (6%)    | 0.006 | 519 (4%)     | 484 (4%)    | 0.014 |
| Hypertension                                     | 7,040 (77%)  | 7,234 (79%) | 0.051 | 2,327 (67%)  | 2,384 (69%) | 0.036 | 4,296 (30%)  | 4,340 (30%) | 0.007 | 2,391 (17%)  | 2,479 (18%) | 0.017 |
| Hypothyroidism                                   | 1,080 (12%)  | 1,035 (11%) | 0.015 | 376 (11%)    | 388 (11%)   | 0.011 | 770 (5%)     | 743 (5%)    | 0.009 | 500 (4%)     | 503 (4%)    | 0.001 |
| Malignant neoplastic disease                     | 1,485 (16%)  | 1,565 (17%) | 0.023 | 579 (17%)    | 594 (17%)   | 0.012 | 582 (4%)     | 606 (4%)    | 0.008 | 324 (2%)     | 317 (2%)    | 0.003 |
| Myocardial infarction                            | 248 (3%)     | 234 (3%)    | 0.010 | 78 (2%)      | 68 (2%)     | 0.020 | 97 (1%)      | 88 (1%)     | 0.008 | 52 (0%)      | 52 (0%)     | 0.000 |
| Osteoporosis                                     | 615 (7%)     | 632 (7%)    | 0.007 | 170 (5%)     | 167 (5%)    | 0.003 | 167 (1%)     | 161 (1%)    | 0.004 | 97 (1%)      | 107 (1%)    | 0.008 |
| Pneumonia                                        | 698 (8%)     | 696 (8%)    | 0.001 | 222 (6%)     | 222 (6%)    | 0.001 | 543 (4%)     | 505 (4%)    | 0.014 | 418 (3%)     | 429 (3%)    | 0.005 |
| Rheumatoid arthritis                             | 240 (3%)     | 239 (3%)    | 0.001 | 128 (4%)     | 110 (3%)    | 0.028 | 167 (1%)     | 148 (1%)    | 0.013 | 97 (1%)      | 88 (1%)     | 0.008 |
| Stroke                                           | 419 (5%)     | 417 (5%)    | 0.001 | 134 (4%)     | 131 (4%)    | 0.004 | 121 (1%)     | 130 (1%)    | 0.007 | 74 (1%)      | 82 (1%)     | 0.008 |

|                        | Cohort 1     |            |       | Cohort 2     |            |       | Cohort 3     |            |       | Cohort 4     |            |       |
|------------------------|--------------|------------|-------|--------------|------------|-------|--------------|------------|-------|--------------|------------|-------|
|                        | Unvaccinated | Vaccinated | ASMD  |
| Venous thromboembolism | 438 (5%)     | 416 (5%)   | 0.011 | 153 (4%)     | 117 (3%)   | 0.053 | 220 (2%)     | 214 (1%)   | 0.003 | 159 (1%)     | 138 (1%)   | 0.015 |

The 4 cohorts represent vaccine rollout periods. \*Calculated as the days of previous observation in the database before index date. \*\*Assessed anytime before index date. ASMD = Absolute standardized mean difference, GP = General practice, PCR = Polymerase chain reaction, COPD = Chronic obstructive pulmonary disease, GERD = Gastro-Esophageal reflux disease

**Table S21: Characteristics of unweighted populations in CORIVA, database, stratified by staggered cohort and exposure status. Exposure is BNT162b2 vaccine.**

|                                                  | Cohort 1     |              |       | Cohort 2     |             |       | Cohort 3     |             |       | Cohort 4     |             |       |
|--------------------------------------------------|--------------|--------------|-------|--------------|-------------|-------|--------------|-------------|-------|--------------|-------------|-------|
|                                                  | Unvaccinated | Vaccinated   | ASMD  | Unvaccinated | Vaccinated  | ASMD  | Unvaccinated | Vaccinated  | ASMD  | Unvaccinated | Vaccinated  | ASMD  |
| <b>N (individuals)</b>                           | 24,073       | 19,686       |       | 34,320       | 4,067       |       | 96,471       | 18,645      |       | 147,553      | 15,683      |       |
| <b>Age, median [Q25-Q75]</b>                     | 79 [73-85]   | 79 [74-83]   | 0.040 | 72 [67-81]   | 70 [66-75]  | 0.174 | 54 [46-66]   | 51 [45-59]  | 0.257 | 42 [32-58]   | 38 [30-50]  | 0.216 |
| <b>Sex: Female, N(%)</b>                         | 16,582 (69%) | 13,022 (66%) | 0.058 | 21,867 (64%) | 2,582 (63%) | 0.005 | 49,023 (51%) | 9,570 (51%) | 0.010 | 72,056 (49%) | 7,500 (48%) | 0.020 |
| <b>Years of prior history*, median [Q25-Q75]</b> | 4 [4-4]      | 4 [4-4]      | 0.026 | 4 [4-4]      | 4 [4-4]     | 0.000 | 4 [4-4]      | 4 [4-4]     | 0.000 | 5 [4-5]      | 5 [4-5]     | 0.003 |
| <b>Number of GP visits, median [Q25-Q75]</b>     | 11 [1-22]    | 17 [9-27]    | 0.252 | 9 [1-20]     | 13 [6-23]   | 0.150 | 2 [0-10]     | 5 [1-11]    | 0.077 | 1 [0-6]      | 4 [1-9]     | 0.116 |
| <b>Number of PCR tests, median [Q25-Q75]</b>     | 0[0-0]       | 0[0-0]       | 0.021 | 0[0-0]       | 0[0-0]      | 0.038 | 0[0-0]       | 0[0-0]      | 0.020 | 0[0-0]       | 0[0-0]      | 0.037 |
| <b>Comorbidities**, N(%)</b>                     |              |              |       |              |             |       |              |             |       |              |             |       |
| Anxiety                                          | 1,966 (8%)   | 2,429 (12%)  | 0.138 | 2,816 (8%)   | 458 (11%)   | 0.103 | 6,416 (7%)   | 1,780 (10%) | 0.106 | 9,291 (6%)   | 1,384 (9%)  | 0.096 |
| Asthma                                           | 2,004 (8%)   | 2,029 (10%)  | 0.068 | 2,653 (8%)   | 404 (10%)   | 0.078 | 4,393 (5%)   | 969 (5%)    | 0.030 | 5,403 (4%)   | 730 (5%)    | 0.050 |
| Chronic kidney disease                           | 2,284 (9%)   | 2,041 (10%)  | 0.029 | 2,943 (9%)   | 326 (8%)    | 0.020 | 2,537 (3%)   | 263 (1%)    | 0.087 | 2,339 (2%)   | 146 (1%)    | 0.059 |
| COPD                                             | 1,587 (7%)   | 1,501 (8%)   | 0.040 | 2,013 (6%)   | 274 (7%)    | 0.036 | 2,746 (3%)   | 388 (2%)    | 0.049 | 2,560 (2%)   | 193 (1%)    | 0.042 |
| Dementia                                         | 1,162 (5%)   | 688 (3%)     | 0.067 | 1,301 (4%)   | 90 (2%)     | 0.093 | 1,136 (1%)   | 81 (0%)     | 0.083 | 1,062 (1%)   | 40 (0%)     | 0.067 |
| Depressive disorder                              | 2,070 (9%)   | 2,449 (12%)  | 0.125 | 3,188 (9%)   | 502 (12%)   | 0.098 | 7,303 (8%)   | 2,075 (11%) | 0.122 | 10,051 (7%)  | 1,623 (10%) | 0.127 |
| Diabetes                                         | 3,964 (16%)  | 3,599 (18%)  | 0.048 | 4,814 (14%)  | 638 (16%)   | 0.047 | 6,071 (6%)   | 900 (5%)    | 0.064 | 6,594 (4%)   | 644 (4%)    | 0.018 |
| GERD                                             | 2,532 (11%)  | 3,307 (17%)  | 0.184 | 3,364 (10%)  | 587 (14%)   | 0.142 | 6,296 (7%)   | 1,858 (10%) | 0.125 | 7,446 (5%)   | 1,050 (7%)  | 0.070 |
| Heart failure                                    | 8,750 (36%)  | 7,743 (39%)  | 0.062 | 9,570 (28%)  | 1,026 (25%) | 0.060 | 10,000 (10%) | 1,057 (6%)  | 0.174 | 9,185 (6%)   | 525 (3%)    | 0.135 |
| Hypertension                                     | 16,718 (69%) | 16,325 (83%) | 0.321 | 20,659 (60%) | 2,838 (70%) | 0.202 | 29,995 (31%) | 5,624 (30%) | 0.020 | 27,979 (19%) | 2,798 (18%) | 0.029 |
| Hypothyroidism                                   | 2,526 (10%)  | 2,352 (12%)  | 0.046 | 3,197 (9%)   | 464 (11%)   | 0.069 | 4,732 (5%)   | 988 (5%)    | 0.018 | 5,173 (4%)   | 576 (4%)    | 0.009 |
| Malignant neoplastic disease                     | 3,216 (13%)  | 3,873 (20%)  | 0.171 | 5,060 (15%)  | 700 (17%)   | 0.067 | 4,587 (5%)   | 764 (4%)    | 0.032 | 4,139 (3%)   | 352 (2%)    | 0.036 |
| Myocardial infarction                            | 539 (2%)     | 591 (3%)     | 0.048 | 696 (2%)     | 82 (2%)     | 0.001 | 850 (1%)     | 108 (1%)    | 0.035 | 779 (1%)     | 58 (0%)     | 0.024 |
| Osteoporosis                                     | 1,283 (5%)   | 1,628 (8%)   | 0.117 | 1,447 (4%)   | 200 (5%)    | 0.034 | 1,550 (2%)   | 197 (1%)    | 0.048 | 1,403 (1%)   | 117 (1%)    | 0.022 |
| Pneumonia                                        | 1,621 (7%)   | 1,624 (8%)   | 0.058 | 2,080 (6%)   | 264 (6%)    | 0.018 | 3,353 (3%)   | 672 (4%)    | 0.007 | 3,920 (3%)   | 499 (3%)    | 0.031 |

|                        | Cohort 1     |            |       | Cohort 2     |            |       | Cohort 3     |            |       | Cohort 4     |            |       |
|------------------------|--------------|------------|-------|--------------|------------|-------|--------------|------------|-------|--------------|------------|-------|
|                        | Unvaccinated | Vaccinated | ASMD  |
| Rheumatoid arthritis   | 491 (2%)     | 603 (3%)   | 0.065 | 892 (3%)     | 137 (3%)   | 0.045 | 1,025 (1%)   | 190 (1%)   | 0.004 | 990 (1%)     | 99 (1%)    | 0.005 |
| Stroke                 | 1,129 (5%)   | 834 (4%)   | 0.022 | 1,447 (4%)   | 152 (4%)   | 0.025 | 1,370 (1%)   | 155 (1%)   | 0.056 | 1,254 (1%)   | 90 (1%)    | 0.033 |
| Venous thromboembolism | 1,067 (4%)   | 972 (5%)   | 0.024 | 1,353 (4%)   | 140 (3%)   | 0.027 | 1,808 (2%)   | 266 (1%)   | 0.035 | 1,785 (1%)   | 156 (1%)   | 0.021 |

The 4 cohorts represent vaccine rollout periods. \*Calculated as the days of previous observation in the database before index date. \*\*Assessed anytime before index date. ASMD = Absolute standardized mean difference, GP = General practice, PCR = Polymerase chain reaction, COPD = Chronic obstructive pulmonary disease, GERD = Gastro-Esophageal reflux disease

**Table S22: Characteristics of weighted populations in CPRD AURUM database, stratified by staggered cohort and vaccine.**

|                                                  | Cohort 1     |              |       | Cohort 2      |               |       | Cohort 3     |              |       | Cohort 4     |              |       |
|--------------------------------------------------|--------------|--------------|-------|---------------|---------------|-------|--------------|--------------|-------|--------------|--------------|-------|
|                                                  | ChAdOx1      | BNT162b2     | ASMD  | ChAdOx1       | BNT162b2      | ASMD  | ChAdOx1      | BNT162b2     | ASMD  | ChAdOx1      | BNT162b2     | ASMD  |
| <b>N (individuals)</b>                           | 48,138       | 48,432       |       | 306,114       | 307,972       |       | 35,517       | 35,840       |       | 117,220      | 116,722      |       |
| <b>Age, median [Q25-Q75]</b>                     | 80 [77-85]   | 80 [77-85]   | 0.003 | 66 [57-72]    | 66 [57-72]    | 0.003 | 54 [46-60]   | 54 [46-60]   | 0.000 | 42 [39-46]   | 42 [39-46]   | 0.004 |
| <b>Sex: Female, N(%)</b>                         | 27,920 (58%) | 27,962 (58%) | 0.005 | 167,623 (55%) | 168,473 (55%) | 0.001 | 21,299 (60%) | 21,484 (60%) | 0.000 | 54,350 (46%) | 54,304 (47%) | 0.003 |
| <b>Years of prior history*, median [Q25-Q75]</b> | 24 [9-36]    | 25 [11-36]   | 0.011 | 21 [9-32]     | 21 [9-32]     | 0.000 | 17 [8-27]    | 17 [7-27]    | 0.007 | 9 [4-17]     | 9 [4-17]     | 0.001 |
| <b>Number of GP visits, median [Q25-Q75]</b>     | 12 [6-19]    | 12 [6-19]    | 0.003 | 10 [5-16]     | 10 [6-16]     | 0.001 | 8 [4-14]     | 8 [4-14]     | 0.012 | 4 [1-8]      | 4 [1-8]      | 0.008 |
| <b>Number of PCR tests, median [Q25-Q75]</b>     | 0[0-0]       | 0[0-0]       | 0.006 | 0[0-0]        | 0[0-0]        | 0.003 | 0[0-0]       | 0[0-0]       | 0.013 | 0[0-0]       | 0[0-0]       | 0.003 |
| <b>Comorbidities**, N(%)</b>                     |              |              |       |               |               |       |              |              |       |              |              |       |
| Anxiety                                          | 7,101 (15%)  | 7,442 (15%)  | 0.017 | 62,230 (20%)  | 61,892 (20%)  | 0.006 | 7,419 (21%)  | 7,362 (21%)  | 0.009 | 19,086 (16%) | 19,543 (17%) | 0.012 |
| Asthma                                           | 5,241 (11%)  | 5,396 (11%)  | 0.008 | 57,043 (19%)  | 56,551 (18%)  | 0.007 | 6,365 (18%)  | 6,097 (17%)  | 0.024 | 9,186 (8%)   | 9,059 (8%)   | 0.003 |
| Chronic kidney disease                           | 11,403 (24%) | 11,809 (24%) | 0.016 | 28,219 (9%)   | 29,790 (10%)  | 0.016 | 1,565 (4%)   | 1,700 (5%)   | 0.016 | 793 (1%)     | 897 (1%)     | 0.011 |
| COPD                                             | 4,080 (8%)   | 4,014 (8%)   | 0.007 | 20,765 (7%)   | 20,456 (7%)   | 0.006 | 661 (2%)     | 669 (2%)     | 0.000 | 424 (0%)     | 471 (0%)     | 0.007 |
| Dementia                                         | 3,667 (8%)   | 3,510 (7%)   | 0.014 | 2,733 (1%)    | 2,137 (1%)    | 0.022 | 419 (1%)     | 288 (1%)     | 0.038 | 109 (0%)     | 60 (0%)      | 0.016 |
| Depressive disorder                              | 5,666 (12%)  | 5,885 (12%)  | 0.012 | 56,642 (19%)  | 57,377 (19%)  | 0.003 | 6,508 (18%)  | 6,556 (18%)  | 0.001 | 16,027 (14%) | 16,191 (14%) | 0.006 |
| Diabetes                                         | 8,849 (18%)  | 9,020 (19%)  | 0.006 | 50,019 (16%)  | 50,218 (16%)  | 0.001 | 2,560 (7%)   | 2,850 (8%)   | 0.028 | 3,231 (3%)   | 3,106 (3%)   | 0.006 |
| GERD                                             | 2,637 (5%)   | 2,694 (6%)   | 0.004 | 16,666 (5%)   | 16,658 (5%)   | 0.002 | 1,479 (4%)   | 1,443 (4%)   | 0.007 | 3,087 (3%)   | 3,046 (3%)   | 0.001 |
| Heart failure                                    | 2,843 (6%)   | 2,904 (6%)   | 0.004 | 6,822 (2%)    | 6,936 (2%)    | 0.002 | 443 (1%)     | 361 (1%)     | 0.023 | 204 (0%)     | 202 (0%)     | 0.000 |
| Hypertension                                     | 25,422 (53%) | 26,106 (54%) | 0.022 | 103,545 (34%) | 105,521 (34%) | 0.009 | 6,295 (18%)  | 6,514 (18%)  | 0.012 | 6,692 (6%)   | 6,522 (6%)   | 0.005 |
| Hypothyroidism                                   | 4,806 (10%)  | 4,978 (10%)  | 0.010 | 22,667 (7%)   | 23,290 (8%)   | 0.006 | 1,845 (5%)   | 1,886 (5%)   | 0.003 | 2,985 (3%)   | 3,025 (3%)   | 0.003 |
| Malignant neoplastic disease                     | 10,958 (23%) | 11,284 (23%) | 0.013 | 38,507 (13%)  | 40,499 (13%)  | 0.017 | 2,019 (6%)   | 2,152 (6%)   | 0.014 | 1,504 (1%)   | 1,576 (1%)   | 0.006 |
| Myocardial infarction                            | 2,481 (5%)   | 2,516 (5%)   | 0.002 | 11,083 (4%)   | 11,197 (4%)   | 0.001 | 425 (1%)     | 521 (1%)     | 0.022 | 256 (0%)     | 349 (0%)     | 0.016 |
| Osteoporosis                                     | 5,117 (11%)  | 5,335 (11%)  | 0.012 | 11,759 (4%)   | 11,858 (4%)   | 0.000 | 719 (2%)     | 667 (2%)     | 0.012 | 344 (0%)     | 372 (0%)     | 0.004 |

|                        | Cohort 1   |            |       | Cohort 2    |             |       | Cohort 3 |          |       | Cohort 4 |          |       |
|------------------------|------------|------------|-------|-------------|-------------|-------|----------|----------|-------|----------|----------|-------|
|                        | ChAdOx1    | BNT162b2   | ASMD  | ChAdOx1     | BNT162b2    | ASMD  | ChAdOx1  | BNT162b2 | ASMD  | ChAdOx1  | BNT162b2 | ASMD  |
| Pneumonia              | 2,576 (5%) | 2,527 (5%) | 0.006 | 9,543 (3%)  | 9,423 (3%)  | 0.003 | 808 (2%) | 692 (2%) | 0.024 | 979 (1%) | 904 (1%) | 0.007 |
| Rheumatoid arthritis   | 935 (2%)   | 1,005 (2%) | 0.010 | 6,476 (2%)  | 6,640 (2%)  | 0.003 | 284 (1%) | 344 (1%) | 0.017 | 216 (0%) | 258 (0%) | 0.008 |
| Stroke                 | 2,314 (5%) | 2,418 (5%) | 0.009 | 7,284 (2%)  | 7,949 (3%)  | 0.013 | 446 (1%) | 414 (1%) | 0.009 | 294 (0%) | 336 (0%) | 0.007 |
| Venous thromboembolism | 3,001 (6%) | 3,101 (6%) | 0.007 | 11,833 (4%) | 12,315 (4%) | 0.007 | 812 (2%) | 853 (2%) | 0.006 | 601 (1%) | 765 (1%) | 0.019 |

The 4 cohorts represent vaccine rollout periods. \*Calculated as the days of previous observation in the database before index date. \*\*Assessed anytime before index date. ASMD = Absolute standardized mean difference, GP = General practice, PCR = Polymerase chain reaction, COPD = Chronic obstructive pulmonary disease, GERD = Gastro-Esophageal reflux disease

**Table S23: Characteristics of unweighted populations in CPRD AURUM database, stratified by staggered cohort and vaccine.**

|                                                  | Cohort 1      |               |       | Cohort 2      |               |       | Cohort 3      |              |       | Cohort 4      |               |       |
|--------------------------------------------------|---------------|---------------|-------|---------------|---------------|-------|---------------|--------------|-------|---------------|---------------|-------|
|                                                  | ChAdOx1       | BNT162b2      | ASMD  | ChAdOx1       | BNT162b2      | ASMD  | ChAdOx1       | BNT162b2     | ASMD  | ChAdOx1       | BNT162b2      | ASMD  |
| <b>N (individuals)</b>                           | 219,804       | 332,790       |       | 969,262       | 594,262       |       | 1,473,602     | 54,102       |       | 542,670       | 1,335,671     |       |
| <b>Age, median [Q25-Q75]</b>                     | 80 [77-85]    | 82 [79-86]    | 0.129 | 69 [63-73]    | 67 [56-73]    | 0.148 | 55 [51-60]    | 58 [50-82]   | 0.381 | 45 [42-48]    | 31 [25-37]    | 1.319 |
| <b>Sex: Female, N(%)</b>                         | 127,656 (58%) | 186,481 (56%) | 0.041 | 528,692 (55%) | 324,259 (55%) | 0.000 | 739,444 (50%) | 32,310 (60%) | 0.193 | 242,758 (45%) | 625,195 (47%) | 0.042 |
| <b>Years of prior history*, median [Q25-Q75]</b> | 24 [9-36]     | 26 [13-38]    | 0.059 | 21 [9-33]     | 21 [9-32]     | 0.028 | 17 [8-27]     | 19 [8-30]    | 0.116 | 10 [5-18]     | 7 [3-19]      | 0.146 |
| <b>Number of GP visits, median [Q25-Q75]</b>     | 12 [6-19]     | 11 [6-18]     | 0.038 | 10 [6-17]     | 11 [6-17]     | 0.015 | 7 [3-12]      | 10 [5-17]    | 0.294 | 3 [1-8]       | 3 [1-7]       | 0.045 |
| <b>Number of PCR tests, median [Q25-Q75]</b>     | 0[0-0]        | 0[0-0]        | 0.183 | 0[0-0]        | 0[0-0]        | 0.014 | 0[0-0]        | 0[0-0]       | 0.171 | 0[0-0]        | 0[0-0]        | 0.008 |
| <b>Comorbidities**, N(%)</b>                     |               |               |       |               |               |       |               |              |       |               |               |       |
| Anxiety                                          | 33,355 (15%)  | 49,410 (15%)  | 0.009 | 187,469 (19%) | 122,087 (21%) | 0.030 | 281,846 (19%) | 10,441 (19%) | 0.004 | 86,805 (16%)  | 218,144 (16%) | 0.009 |
| Asthma                                           | 24,009 (11%)  | 37,889 (11%)  | 0.015 | 159,162 (16%) | 116,596 (20%) | 0.083 | 200,995 (14%) | 8,668 (16%)  | 0.067 | 41,393 (8%)   | 114,378 (9%)  | 0.034 |
| Chronic kidney disease                           | 51,053 (23%)  | 86,899 (26%)  | 0.067 | 97,339 (10%)  | 56,923 (10%)  | 0.016 | 24,198 (2%)   | 6,692 (12%)  | 0.430 | 2,879 (1%)    | 2,664 (0%)    | 0.055 |
| COPD                                             | 19,105 (9%)   | 28,317 (9%)   | 0.007 | 67,700 (7%)   | 39,595 (7%)   | 0.013 | 13,621 (1%)   | 2,063 (4%)   | 0.191 | 1,510 (0%)    | 942 (0%)      | 0.050 |
| Dementia                                         | 16,795 (8%)   | 16,138 (5%)   | 0.116 | 12,106 (1%)   | 3,720 (1%)    | 0.065 | 1,896 (0%)    | 1,323 (2%)   | 0.207 | 447 (0%)      | 119 (0%)      | 0.034 |
| Depressive disorder                              | 27,009 (12%)  | 37,831 (11%)  | 0.028 | 170,626 (18%) | 112,753 (19%) | 0.035 | 256,789 (17%) | 9,046 (17%)  | 0.019 | 74,210 (14%)  | 155,037 (12%) | 0.062 |
| Diabetes                                         | 39,751 (18%)  | 61,929 (19%)  | 0.014 | 154,348 (16%) | 98,676 (17%)  | 0.018 | 78,394 (5%)   | 5,817 (11%)  | 0.201 | 9,729 (2%)    | 12,040 (1%)   | 0.077 |
| GERD                                             | 12,156 (6%)   | 20,204 (6%)   | 0.023 | 52,694 (5%)   | 32,288 (5%)   | 0.000 | 56,444 (4%)   | 2,506 (5%)   | 0.040 | 13,807 (3%)   | 21,599 (2%)   | 0.065 |
| Heart failure                                    | 13,147 (6%)   | 20,430 (6%)   | 0.007 | 24,276 (3%)   | 13,120 (2%)   | 0.020 | 5,673 (0%)    | 1,529 (3%)   | 0.195 | 681 (0%)      | 448 (0%)      | 0.033 |
| Hypertension                                     | 114,922 (52%) | 186,367 (56%) | 0.075 | 345,014 (36%) | 200,762 (34%) | 0.038 | 224,543 (15%) | 15,536 (29%) | 0.330 | 31,330 (6%)   | 19,649 (1%)   | 0.232 |
| Hypothyroidism                                   | 21,855 (10%)  | 34,512 (10%)  | 0.014 | 73,992 (8%)   | 44,456 (7%)   | 0.006 | 64,026 (4%)   | 3,642 (7%)   | 0.104 | 13,920 (3%)   | 18,516 (1%)   | 0.085 |
| Malignant neoplastic disease                     | 49,023 (22%)  | 82,610 (25%)  | 0.059 | 131,135 (14%) | 76,103 (13%)  | 0.021 | 55,601 (4%)   | 6,311 (12%)  | 0.299 | 7,505 (1%)    | 5,104 (0%)    | 0.107 |
| Myocardial infarction                            | 11,236 (5%)   | 18,289 (5%)   | 0.017 | 33,142 (3%)   | 23,019 (4%)   | 0.024 | 11,237 (1%)   | 1,464 (3%)   | 0.149 | 861 (0%)      | 715 (0%)      | 0.032 |

|                        | Cohort 1     |              |       | Cohort 2    |             |       | Cohort 3    |            |       | Cohort 4   |            |       |
|------------------------|--------------|--------------|-------|-------------|-------------|-------|-------------|------------|-------|------------|------------|-------|
|                        | ChAdOx1      | BNT162b2     | ASMD  | ChAdOx1     | BNT162b2    | ASMD  | ChAdOx1     | BNT162b2   | ASMD  | ChAdOx1    | BNT162b2   | ASMD  |
| Osteoporosis           | 22,986 (10%) | 36,535 (11%) | 0.017 | 42,319 (4%) | 21,789 (4%) | 0.036 | 12,455 (1%) | 2,632 (5%) | 0.243 | 1,380 (0%) | 1,028 (0%) | 0.044 |
| Pneumonia              | 12,101 (6%)  | 16,297 (5%)  | 0.027 | 33,170 (3%) | 17,567 (3%) | 0.027 | 20,399 (1%) | 1,658 (3%) | 0.114 | 4,297 (1%) | 7,793 (1%) | 0.025 |
| Rheumatoid arthritis   | 4,544 (2%)   | 6,693 (2%)   | 0.004 | 20,294 (2%) | 12,878 (2%) | 0.005 | 8,463 (1%)  | 667 (1%)   | 0.070 | 821 (0%)   | 891 (0%)   | 0.026 |
| Stroke                 | 10,876 (5%)  | 15,601 (5%)  | 0.012 | 24,851 (3%) | 15,056 (3%) | 0.002 | 9,547 (1%)  | 1,281 (2%) | 0.141 | 1,153 (0%) | 1,022 (0%) | 0.036 |
| Venous thromboembolism | 13,782 (6%)  | 21,549 (6%)  | 0.008 | 39,415 (4%) | 23,632 (4%) | 0.005 | 24,312 (2%) | 1,980 (4%) | 0.125 | 1,936 (0%) | 2,541 (0%) | 0.032 |

The 4 cohorts represent vaccine rollout periods. \*Calculated as the days of previous observation in the database before index date. \*\*Assessed anytime before index date. ASMD = Absolute standardized mean difference, GP = General practice, PCR = Polymerase chain reaction, COPD = Chronic obstructive pulmonary disease, GERD = Gastro-Esophageal reflux disease



**Table S24: Characteristics of weighted populations in CPRD GOLD database, stratified by staggered cohort and vaccine.**

|                                                  | Cohort 1    |             |       | Cohort 2     |              |       | Cohort 3     |              |       | Cohort 4     |              |       |
|--------------------------------------------------|-------------|-------------|-------|--------------|--------------|-------|--------------|--------------|-------|--------------|--------------|-------|
|                                                  | ChAdOx1     | BNT162b2    | ASMD  | ChAdOx1      | BNT162b2     | ASMD  | ChAdOx1      | BNT162b2     | ASMD  | ChAdOx1      | BNT162b2     | ASMD  |
| <b>N (individuals)</b>                           | 7,490       | 7,490       |       | 77,012       | 76,978       |       | 24,590       | 24,597       |       | 49,538       | 49,577       |       |
| <b>Age, median [Q25-Q75]</b>                     | 82 [78-86]  | 80 [78-86]  | 0.000 | 70 [65-74]   | 70 [65-74]   | 0.004 | 54 [49-59]   | 54 [49-59]   | 0.009 | 42 [37-46]   | 42 [37-47]   | 0.003 |
| <b>Sex: Female, N(%)</b>                         | 4,266 (57%) | 4,266 (57%) | 0.000 | 41,394 (54%) | 41,607 (54%) | 0.006 | 13,052 (53%) | 13,078 (53%) | 0.002 | 22,308 (45%) | 22,520 (45%) | 0.008 |
| <b>Years of prior history*, median [Q25-Q75]</b> | 18 [12-21]  | 18 [11-21]  | 0.000 | 17 [12-20]   | 17 [12-20]   | 0.005 | 17 [12-20]   | 17 [12-20]   | 0.004 | 14 [6-18]    | 14 [6-18]    | 0.005 |
| <b>Number of GP visits, median [Q25-Q75]</b>     | 14 [9-21]   | 14 [9-21]   | 0.007 | 10 [6-16]    | 10 [6-17]    | 0.012 | 6 [2-11]     | 6 [2-11]     | 0.009 | 2 [0-6]      | 2 [0-7]      | 0.008 |
| <b>Number of PCR tests, median [Q25-Q75]</b>     | 0[0-0]      | 0[0-0]      | 0.004 | 0[0-0]       | 0[0-0]       | 0.002 | 0[0-0]       | 0[0-0]       | 0.011 | 0[0-0]       | 0[0-0]       | 0.002 |
| <b>Comorbidities**, N(%)</b>                     |             |             |       |              |              |       |              |              |       |              |              |       |
| Anxiety                                          | 1,008 (13%) | 1,015 (14%) | 0.002 | 12,765 (17%) | 12,897 (17%) | 0.005 | 5,218 (21%)  | 5,293 (22%)  | 0.007 | 8,501 (17%)  | 8,578 (17%)  | 0.004 |
| Asthma                                           | 783 (10%)   | 774 (10%)   | 0.004 | 9,867 (13%)  | 10,028 (13%) | 0.006 | 2,993 (12%)  | 2,826 (11%)  | 0.021 | 3,700 (7%)   | 3,568 (7%)   | 0.010 |
| Chronic kidney disease                           | 1,711 (23%) | 1,694 (23%) | 0.005 | 7,209 (9%)   | 7,045 (9%)   | 0.007 | 530 (2%)     | 411 (2%)     | 0.035 | 193 (0%)     | 202 (0%)     | 0.003 |
| COPD                                             | 568 (8%)    | 583 (8%)    | 0.008 | 5,739 (7%)   | 5,725 (7%)   | 0.001 | 321 (1%)     | 274 (1%)     | 0.017 | 170 (0%)     | 165 (0%)     | 0.002 |
| Dementia                                         | 543 (7%)    | 495 (7%)    | 0.025 | 726 (1%)     | 737 (1%)     | 0.001 | 55 (0%)      | 74 (0%)      | 0.015 | 28 (0%)      | 21 (0%)      | 0.006 |
| Depressive disorder                              | 733 (10%)   | 729 (10%)   | 0.002 | 11,461 (15%) | 11,746 (15%) | 0.011 | 4,478 (18%)  | 4,427 (18%)  | 0.005 | 7,038 (14%)  | 7,119 (14%)  | 0.004 |
| Diabetes                                         | 1,114 (15%) | 1,107 (15%) | 0.003 | 10,260 (13%) | 10,130 (13%) | 0.005 | 1,051 (4%)   | 963 (4%)     | 0.018 | 768 (2%)     | 654 (1%)     | 0.019 |
| GERD                                             | 451 (6%)    | 447 (6%)    | 0.002 | 3,691 (5%)   | 3,753 (5%)   | 0.004 | 763 (3%)     | 770 (3%)     | 0.001 | 975 (2%)     | 978 (2%)     | 0.000 |
| Heart failure                                    | 395 (5%)    | 411 (5%)    | 0.009 | 1,763 (2%)   | 1,819 (2%)   | 0.005 | 125 (1%)     | 81 (0%)      | 0.028 | 50 (0%)      | 54 (0%)      | 0.002 |
| Hypertension                                     | 2,761 (37%) | 2,754 (37%) | 0.002 | 21,627 (28%) | 21,686 (28%) | 0.002 | 3,184 (13%)  | 3,261 (13%)  | 0.009 | 1,842 (4%)   | 1,975 (4%)   | 0.014 |
| Hypothyroidism                                   | 579 (8%)    | 566 (8%)    | 0.007 | 4,932 (6%)   | 4,869 (6%)   | 0.003 | 1,064 (4%)   | 1,065 (4%)   | 0.000 | 979 (2%)     | 1,028 (2%)   | 0.007 |
| Malignant neoplastic disease                     | 1,632 (22%) | 1,744 (23%) | 0.036 | 10,682 (14%) | 9,986 (13%)  | 0.026 | 1,007 (4%)   | 1,089 (4%)   | 0.017 | 598 (1%)     | 660 (1%)     | 0.011 |
| Myocardial infarction                            | 330 (4%)    | 325 (4%)    | 0.004 | 2,919 (4%)   | 2,943 (4%)   | 0.002 | 239 (1%)     | 217 (1%)     | 0.010 | 90 (0%)      | 85 (0%)      | 0.002 |

|                        | Cohort 1 |          |       | Cohort 2   |            |       | Cohort 3 |          |       | Cohort 4 |          |       |
|------------------------|----------|----------|-------|------------|------------|-------|----------|----------|-------|----------|----------|-------|
|                        | ChAdOx1  | BNT162b2 | ASMD  | ChAdOx1    | BNT162b2   | ASMD  | ChAdOx1  | BNT162b2 | ASMD  | ChAdOx1  | BNT162b2 | ASMD  |
| Osteoporosis           | 665 (9%) | 638 (9%) | 0.013 | 3,388 (4%) | 3,496 (5%) | 0.007 | 323 (1%) | 314 (1%) | 0.003 | 103 (0%) | 92 (0%)  | 0.005 |
| Pneumonia              | 286 (4%) | 258 (3%) | 0.020 | 1,807 (2%) | 1,724 (2%) | 0.007 | 263 (1%) | 252 (1%) | 0.005 | 271 (1%) | 265 (1%) | 0.002 |
| Rheumatoid arthritis   | 111 (1%) | 111 (1%) | 0.001 | 1,437 (2%) | 1,460 (2%) | 0.002 | 123 (1%) | 115 (0%) | 0.005 | 58 (0%)  | 40 (0%)  | 0.011 |
| Stroke                 | 325 (4%) | 321 (4%) | 0.003 | 2,134 (3%) | 2,072 (3%) | 0.005 | 207 (1%) | 148 (1%) | 0.028 | 96 (0%)  | 91 (0%)  | 0.002 |
| Venous thromboembolism | 306 (4%) | 341 (5%) | 0.023 | 2,125 (3%) | 2,153 (3%) | 0.002 | 288 (1%) | 285 (1%) | 0.001 | 146 (0%) | 198 (0%) | 0.018 |

The 4 cohorts represent vaccine rollout periods. \*Calculated as the days of previous observation in the database before index date. \*\*Assessed anytime before index date. ASMD = Absolute standardized mean difference, GP = General practice, PCR = Polymerase chain reaction, COPD = Chronic obstructive pulmonary disease, GERD = Gastro-Esophageal reflux disease

**Table S25: Characteristics of unweighted populations in CPRD GOLD database, stratified by staggered cohort and vaccine.**

|                                                  | Cohort 1        |                 |       | Cohort 2         |                 |       | Cohort 3         |                 |       | Cohort 4        |                  |       |
|--------------------------------------------------|-----------------|-----------------|-------|------------------|-----------------|-------|------------------|-----------------|-------|-----------------|------------------|-------|
|                                                  | ChAdOx1         | BNT162b2        | ASMD  | ChAdOx1          | BNT162b2        | ASMD  | ChAdOx1          | BNT162b2        | ASMD  | ChAdOx1         | BNT162b2         | ASMD  |
| <b>N (individuals)</b>                           | 82,406          | 32,755          |       | 302,999          | 180,670         |       | 423,876          | 36,748          |       | 147,744         | 365,096          |       |
| <b>Age, median [Q25-Q75]</b>                     | 84 [82-88]      | 81 [79-86]      | 0.351 | 71 [66-76]       | 70 [66-74]      | 0.132 | 56 [52-61]       | 54 [50-60]      | 0.171 | 44 [41-48]      | 31 [24-37]       | 1.090 |
| <b>Sex: Female, N(%)</b>                         | 47,915<br>(58%) | 18,415<br>(56%) | 0.039 | 162,753<br>(54%) | 97,747<br>(54%) | 0.008 | 210,283<br>(50%) | 19,649<br>(53%) | 0.077 | 64,999<br>(44%) | 167,510<br>(46%) | 0.038 |
| <b>Years of prior history*, median [Q25-Q75]</b> | 17 [14-20]      | 18 [13-21]      | 0.001 | 17 [13-19]       | 17 [12-19]      | 0.014 | 17 [10-19]       | 18 [12-20]      | 0.107 | 14 [7-18]       | 15 [6-18]        | 0.017 |
| <b>Number of GP visits, median [Q25-Q75]</b>     | 14 [9-21]       | 14 [9-21]       | 0.005 | 11 [7-18]        | 10 [6-16]       | 0.122 | 6 [2-12]         | 6 [2-11]        | 0.069 | 3 [0-7]         | 2 [0-6]          | 0.098 |
| <b>Number of PCR tests, median [Q25-Q75]</b>     | 0[0-0]          | 0[0-0]          | 0.006 | 0[0-0]           | 0[0-0]          | 0.009 | 0[0-0]           | 0[0-0]          | 0.021 | 0[0-0]          | 0[0-0]           | 0.011 |
| <b>Comorbidities**, N(%)</b>                     |                 |                 |       |                  |                 |       |                  |                 |       |                 |                  |       |
| Anxiety                                          | 9,923 (12%)     | 4,336 (13%)     | 0.036 | 49,010 (16%)     | 28,697 (16%)    | 0.008 | 75,258 (18%)     | 8,004 (22%)     | 0.101 | 24,601 (17%)    | 59,094 (16%)     | 0.013 |
| Asthma                                           | 8,491 (10%)     | 3,250 (10%)     | 0.013 | 39,988 (13%)     | 21,396 (12%)    | 0.041 | 48,034 (11%)     | 4,053 (11%)     | 0.010 | 10,517 (7%)     | 33,240 (9%)      | 0.073 |
| Chronic kidney disease                           | 21,564 (26%)    | 7,430 (23%)     | 0.081 | 34,168 (11%)     | 15,033 (8%)     | 0.100 | 7,553 (2%)       | 566 (2%)        | 0.019 | 739 (1%)        | 578 (0%)         | 0.060 |
| COPD                                             | 6,837 (8%)      | 2,417 (7%)      | 0.034 | 27,472 (9%)      | 11,545 (6%)     | 0.100 | 6,334 (1%)       | 348 (1%)        | 0.050 | 640 (0%)        | 285 (0%)         | 0.070 |
| Dementia                                         | 4,773 (6%)      | 1,895 (6%)      | 0.000 | 5,124 (2%)       | 1,375 (1%)      | 0.085 | 548 (0%)         | 87 (0%)         | 0.025 | 126 (0%)        | 29 (0%)          | 0.036 |
| Depressive disorder                              | 6,998 (8%)      | 3,310 (10%)     | 0.056 | 45,154 (15%)     | 26,294 (15%)    | 0.010 | 70,703 (17%)     | 6,569 (18%)     | 0.032 | 21,711 (15%)    | 39,181 (11%)     | 0.119 |
| Diabetes                                         | 12,387 (15%)    | 4,882 (15%)     | 0.004 | 43,647 (14%)     | 22,552 (12%)    | 0.056 | 24,219 (6%)      | 1,191 (3%)      | 0.120 | 2,254 (2%)      | 2,507 (1%)       | 0.080 |
| GERD                                             | 4,054 (5%)      | 2,012 (6%)      | 0.054 | 14,294 (5%)      | 8,525 (5%)      | 0.000 | 14,447 (3%)      | 1,093 (3%)      | 0.025 | 2,883 (2%)      | 5,213 (1%)       | 0.041 |
| Heart failure                                    | 5,058 (6%)      | 1,782 (5%)      | 0.030 | 9,180 (3%)       | 3,669 (2%)      | 0.064 | 2,308 (1%)       | 100 (0%)        | 0.043 | 191 (0%)        | 98 (0%)          | 0.037 |
| Hypertension                                     | 31,217 (38%)    | 11,995 (37%)    | 0.026 | 88,833 (29%)     | 49,763 (28%)    | 0.039 | 59,554 (14%)     | 4,679 (13%)     | 0.039 | 6,761 (5%)      | 4,776 (1%)       | 0.194 |
| Hypothyroidism                                   | 7,042 (9%)      | 2,373 (7%)      | 0.048 | 20,521 (7%)      | 11,106 (6%)     | 0.025 | 17,382 (4%)      | 1,553 (4%)      | 0.006 | 3,245 (2%)      | 4,180 (1%)       | 0.082 |
| Malignant neoplastic disease                     | 18,950 (23%)    | 6,972 (21%)     | 0.041 | 42,687 (14%)     | 22,617 (13%)    | 0.046 | 17,903 (4%)      | 1,522 (4%)      | 0.004 | 2,192 (1%)      | 1,796 (0%)       | 0.100 |
| Myocardial infarction                            | 4,500 (5%)      | 1,603 (5%)      | 0.026 | 13,456 (4%)      | 6,621 (4%)      | 0.039 | 5,280 (1%)       | 271 (1%)        | 0.051 | 330 (0%)        | 154 (0%)         | 0.050 |

|                        | Cohort 1    |            |       | Cohort 2    |            |       | Cohort 3   |          |       | Cohort 4 |            |       |
|------------------------|-------------|------------|-------|-------------|------------|-------|------------|----------|-------|----------|------------|-------|
|                        | ChAdOx1     | BNT162b2   | ASMD  | ChAdOx1     | BNT162b2   | ASMD  | ChAdOx1    | BNT162b2 | ASMD  | ChAdOx1  | BNT162b2   | ASMD  |
| Osteoporosis           | 8,564 (10%) | 2,770 (8%) | 0.066 | 16,117 (5%) | 7,531 (4%) | 0.054 | 4,330 (1%) | 458 (1%) | 0.021 | 408 (0%) | 205 (0%)   | 0.054 |
| Pneumonia              | 3,231 (4%)  | 1,032 (3%) | 0.042 | 8,604 (3%)  | 3,418 (2%) | 0.062 | 4,527 (1%) | 345 (1%) | 0.013 | 921 (1%) | 1,696 (0%) | 0.022 |
| Rheumatoid arthritis   | 1,257 (2%)  | 512 (2%)   | 0.003 | 5,999 (2%)  | 2,929 (2%) | 0.027 | 2,405 (1%) | 154 (0%) | 0.021 | 191 (0%) | 111 (0%)   | 0.035 |
| Stroke                 | 4,193 (5%)  | 1,490 (5%) | 0.025 | 10,213 (3%) | 4,632 (3%) | 0.048 | 3,789 (1%) | 199 (1%) | 0.042 | 369 (0%) | 225 (0%)   | 0.048 |
| Venous thromboembolism | 3,550 (4%)  | 1,389 (4%) | 0.003 | 9,466 (3%)  | 4,490 (2%) | 0.039 | 6,339 (1%) | 370 (1%) | 0.044 | 460 (0%) | 496 (0%)   | 0.037 |

The 4 cohorts represent vaccine rollout periods. \*Calculated as the days of previous observation in the database before index date. \*\*Assessed anytime before index date. ASMD = Absolute standardized mean difference, GP = General practice, PCR = Polymerase chain reaction, COPD = Chronic obstructive pulmonary disease, GERD = Gastro-Esophageal reflux disease

**Table S26: Number of records (and risk per 10,000 individuals) for post COVID-19 cardiac and thromboembolic complications, across cohorts and databases, stratified by exposure status (any COVID-19 vaccine). Follow-up ends at first vaccine dose after index date.**

| Cohort          | Time window | Outcome | AURUM              |                    | CORIVA            |                   | GOLD               |                    | SIDIAP             |                   |
|-----------------|-------------|---------|--------------------|--------------------|-------------------|-------------------|--------------------|--------------------|--------------------|-------------------|
|                 |             |         | Unvaccinated       | Vaccinated         | Unvaccinated      | Vaccinated        | Unvaccinated       | Vaccinated         | Unvaccinated       | Vaccinated        |
| <b>Cohort 1</b> |             |         | <b>N = 346,674</b> | <b>N = 552,602</b> | <b>N = 23,982</b> | <b>N = 26,736</b> | <b>N = 169,100</b> | <b>N = 118,507</b> | <b>N = 223,962</b> | <b>N = 89,941</b> |
| 0 to 30 days    | VTE         | VTE     | 93 (2.68)          | 45 (0.81)          | 77 (32.11)        | 6 (2.24)          | 8 (0.47)           | < 5                | 74 (3.30)          | < 5               |
|                 |             | DVT     | 22 (0.63)          | 10 (0.18)          | 12 (5.00)         | < 5               | < 5                | < 5                | 19 (0.85)          | < 5               |
|                 |             | PE      | 75 (2.16)          | 37 (0.67)          | 67 (27.94)        | 5 (1.87)          | 7 (0.41)           | < 5                | 59 (2.63)          | < 5               |
|                 |             | ATE     | 22 (0.63)          | 28 (0.51)          | 110 (45.87)       | 6 (2.24)          | 6 (0.35)           | < 5                | 77 (3.44)          | 6 (0.67)          |
|                 |             | IS      | 8 (0.23)           | < 5                | 64 (26.69)        | < 5               | < 5                | < 5                | 45 (2.01)          | < 5               |
|                 |             | TIA     | < 5                | 6 (0.11)           | 20 (8.34)         | < 5               | < 5                | < 5                | 7 (0.31)           | < 5               |
|                 |             | MI      | 11 (0.32)          | 20 (0.36)          | 35 (14.59)        | 5 (1.87)          | < 5                | < 5                | 27 (1.21)          | < 5               |
|                 |             | HF      | 59 (1.70)          | 73 (1.32)          | 395 (164.71)      | 27 (10.10)        | 10 (0.59)          | < 5                | 302 (13.48)        | 23 (2.56)         |
|                 |             | HS      | < 5                | < 5                | < 5               | < 5               | < 5                | < 5                | 7 (0.31)           | < 5               |
|                 |             | MP      | < 5                | < 5                | < 5               | < 5               | < 5                | < 5                | < 5                | < 5               |
| 31 to 90 days   | VTE         | VTE     | 19 (0.55)          | 20 (0.36)          | 37 (15.43)        | < 5               | < 5                | < 5                | 16 (0.71)          | < 5               |
|                 |             | DVT     | 10 (0.29)          | 7 (0.13)           | 20 (8.34)         | < 5               | < 5                | < 5                | 10 (0.45)          | < 5               |
|                 |             | PE      | 9 (0.26)           | 13 (0.24)          | 21 (8.76)         | < 5               | < 5                | < 5                | 6 (0.27)           | < 5               |
|                 |             | ATE     | 5 (0.14)           | 16 (0.29)          | 33 (13.76)        | < 5               | < 5                | < 5                | 41 (1.83)          | 5 (0.56)          |
|                 |             | IS      | < 5                | < 5                | 19 (7.92)         | < 5               | < 5                | < 5                | 20 (0.89)          | < 5               |
|                 |             | TIA     | < 5                | 6 (0.11)           | 8 (3.34)          | < 5               | < 5                | < 5                | 13 (0.58)          | < 5               |
|                 |             | MI      | < 5                | 7 (0.13)           | 12 (5.00)         | < 5               | < 5                | < 5                | 11 (0.49)          | < 5               |
|                 |             | HF      | 30 (0.87)          | 56 (1.01)          | 151 (62.96)       | 14 (5.24)         | < 5                | < 5                | 89 (3.97)          | 8 (0.89)          |
|                 |             | HS      | < 5                | < 5                | < 5               | < 5               | < 5                | < 5                | < 5                | < 5               |
|                 |             | MP      | < 5                | < 5                | < 5               | < 5               | < 5                | < 5                | < 5                | < 5               |
| 91 to 180 days  | VTE         | VTE     | 10 (0.29)          | 9 (0.16)           | 21 (8.76)         | 5 (1.87)          | < 5                | < 5                | 20 (0.89)          | < 5               |
|                 |             | DVT     | 5 (0.14)           | < 5                | 14 (5.84)         | < 5               | < 5                | < 5                | 9 (0.40)           | < 5               |
|                 |             | PE      | 5 (0.14)           | 5 (0.09)           | 9 (3.75)          | < 5               | < 5                | < 5                | 11 (0.49)          | < 5               |
|                 |             | ATE     | 11 (0.32)          | 14 (0.25)          | 31 (12.93)        | < 5               | < 5                | < 5                | 30 (1.34)          | < 5               |
|                 |             | IS      | < 5                | < 5                | 16 (6.67)         | < 5               | < 5                | < 5                | 16 (0.71)          | < 5               |
|                 |             | TIA     | 5 (0.14)           | 6 (0.11)           | 8 (3.34)          | < 5               | < 5                | < 5                | 8 (0.36)           | < 5               |
|                 |             | MI      | 5 (0.14)           | < 5                | 10 (4.17)         | < 5               | < 5                | < 5                | 7 (0.31)           | < 5               |
|                 |             | HF      | 37 (1.07)          | 51 (0.92)          | 162 (67.55)       | 21 (7.85)         | < 5                | < 5                | 87 (3.88)          | 7 (0.78)          |
|                 |             | HS      | < 5                | < 5                | < 5               | < 5               | < 5                | < 5                | < 5                | < 5               |
|                 |             | MP      | < 5                | < 5                | < 5               | < 5               | < 5                | < 5                | < 5                | < 5               |

| Cohort          | Time window     | Outcome | AURUM                |                      | CORIVA            |                  | GOLD               |                    | SIDIAP             |                    |
|-----------------|-----------------|---------|----------------------|----------------------|-------------------|------------------|--------------------|--------------------|--------------------|--------------------|
|                 |                 |         | Unvaccinated         | Vaccinated           | Unvaccinated      | Vaccinated       | Unvaccinated       | Vaccinated         | Unvaccinated       | Vaccinated         |
|                 | 181 to 365 days | VTE     | 10 (0.29)            | 8 (0.14)             | 45 (18.76)        | 7 (2.62)         | < 5                | < 5                | 10 (0.45)          | < 5                |
|                 |                 | DVT     | 5 (0.14)             | < 5                  | 16 (6.67)         | < 5              | < 5                | < 5                | 6 (0.27)           | < 5                |
|                 |                 | PE      | 5 (0.14)             | < 5                  | 34 (14.18)        | < 5              | < 5                | < 5                | < 5                | < 5                |
|                 |                 | ATE     | 10 (0.29)            | 19 (0.34)            | 55 (22.93)        | 11 (4.11)        | < 5                | < 5                | 42 (1.88)          | 8 (0.89)           |
|                 |                 | IS      | < 5                  | 6 (0.11)             | 32 (13.34)        | 10 (3.74)        | < 5                | < 5                | 21 (0.94)          | 5 (0.56)           |
|                 |                 | TIA     | 6 (0.17)             | < 5                  | 16 (6.67)         | < 5              | < 5                | < 5                | 10 (0.45)          | < 5                |
|                 |                 | MI      | < 5                  | 10 (0.18)            | 14 (5.84)         | < 5              | < 5                | < 5                | 11 (0.49)          | < 5                |
|                 |                 | HF      | 40 (1.15)            | 53 (0.96)            | 268 (111.75)      | 48 (17.95)       | < 5                | 6 (0.51)           | 86 (3.84)          | 20 (2.22)          |
|                 |                 | HS      | < 5                  | < 5                  | < 5               | < 5              | < 5                | < 5                | < 5                | < 5                |
|                 |                 | MP      | < 5                  | < 5                  | < 5               | < 5              | < 5                | < 5                | < 5                | < 5                |
| <b>Cohort 2</b> |                 |         | <b>N = 1,975,726</b> | <b>N = 1,563,569</b> | <b>N = 34,317</b> | <b>N = 4,572</b> | <b>N = 583,399</b> | <b>N = 486,619</b> | <b>N = 433,151</b> | <b>N = 819,590</b> |
|                 | 0 to 30 days    | VTE     | 241 (1.22)           | 54 (0.35)            | 79 (23.02)        | < 5              | 31 (0.53)          | 7 (0.14)           | 258 (5.96)         | 27 (0.33)          |
|                 |                 | DVT     | 41 (0.21)            | 19 (0.12)            | 12 (3.50)         | < 5              | 8 (0.14)           | < 5                | 63 (1.45)          | 9 (0.11)           |
|                 |                 | PE      | 204 (1.03)           | 38 (0.24)            | 69 (20.11)        | < 5              | 24 (0.41)          | 6 (0.12)           | 213 (4.92)         | 20 (0.24)          |
|                 |                 | ATE     | 41 (0.21)            | 25 (0.16)            | 110 (32.05)       | < 5              | < 5                | < 5                | 173 (3.99)         | 29 (0.35)          |
|                 |                 | IS      | 7 (0.04)             | 5 (0.03)             | 68 (19.82)        | < 5              | < 5                | < 5                | 96 (2.22)          | 12 (0.15)          |
|                 |                 | TIA     | 8 (0.04)             | < 5                  | 18 (5.25)         | < 5              | < 5                | < 5                | 17 (0.39)          | 6 (0.07)           |
|                 |                 | MI      | 26 (0.13)            | 17 (0.11)            | 35 (10.20)        | < 5              | < 5                | < 5                | 64 (1.48)          | 11 (0.13)          |
|                 |                 | HF      | 45 (0.23)            | 47 (0.30)            | 364 (106.07)      | < 5              | 5 (0.09)           | < 5                | 378 (8.73)         | 76 (0.93)          |
|                 |                 | HS      | 6 (0.03)             | < 5                  | < 5               | < 5              | < 5                | < 5                | 18 (0.42)          | < 5                |
|                 |                 | MP      | 12 (0.06)            | < 5                  | < 5               | < 5              | < 5                | < 5                | 14 (0.32)          | < 5                |
|                 | 31 to 90 days   | VTE     | 43 (0.22)            | 13 (0.08)            | 31 (9.03)         | < 5              | < 5                | < 5                | 59 (1.36)          | 9 (0.11)           |
|                 |                 | DVT     | 24 (0.12)            | 6 (0.04)             | 16 (4.66)         | < 5              | < 5                | < 5                | 32 (0.74)          | 5 (0.06)           |
|                 |                 | PE      | 23 (0.12)            | 8 (0.05)             | 18 (5.25)         | < 5              | < 5                | < 5                | 33 (0.76)          | < 5                |
|                 |                 | ATE     | 18 (0.09)            | 18 (0.12)            | 32 (9.32)         | < 5              | < 5                | < 5                | 85 (1.96)          | 14 (0.17)          |
|                 |                 | IS      | < 5                  | < 5                  | 20 (5.83)         | < 5              | < 5                | < 5                | 43 (0.99)          | 6 (0.07)           |
|                 |                 | TIA     | < 5                  | 7 (0.04)             | < 5               | < 5              | < 5                | < 5                | 23 (0.53)          | 5 (0.06)           |
|                 |                 | MI      | 13 (0.07)            | 10 (0.06)            | 13 (3.79)         | < 5              | < 5                | < 5                | 26 (0.60)          | < 5                |
|                 |                 | HF      | 27 (0.14)            | 30 (0.19)            | 149 (43.42)       | < 5              | < 5                | < 5                | 138 (3.19)         | 29 (0.35)          |
|                 |                 | HS      | < 5                  | < 5                  | < 5               | < 5              | < 5                | < 5                | 7 (0.16)           | < 5                |
|                 |                 | MP      | 6 (0.03)             | < 5                  | < 5               | < 5              | < 5                | < 5                | < 5                | < 5                |
|                 | 91 to 180 days  | VTE     | 28 (0.14)            | 15 (0.10)            | 26 (7.58)         | < 5              | 6 (0.10)           | < 5                | 58 (1.34)          | 6 (0.07)           |
|                 |                 | DVT     | 13 (0.07)            | 9 (0.06)             | 15 (4.37)         | < 5              | < 5                | < 5                | 31 (0.72)          | 6 (0.07)           |
|                 |                 | PE      | 15 (0.08)            | 6 (0.04)             | 12 (3.50)         | < 5              | < 5                | < 5                | 30 (0.69)          | < 5                |

| Cohort        | Time window     | Outcome         | AURUM        |             | CORIVA               |                      | GOLD              |                   | SIDIAP             |                    |                    |                    |
|---------------|-----------------|-----------------|--------------|-------------|----------------------|----------------------|-------------------|-------------------|--------------------|--------------------|--------------------|--------------------|
|               |                 |                 | Unvaccinated | Vaccinated  | Unvaccinated         | Vaccinated           | Unvaccinated      | Vaccinated        | Unvaccinated       | Vaccinated         |                    |                    |
|               |                 | ATE             | 17 (0.09)    | 15 (0.10)   | 32 (9.32)            | < 5                  | < 5               | < 5               | 91 (2.10)          | 19 (0.23)          |                    |                    |
|               |                 | IS              | < 5          | < 5         | 15 (4.37)            | < 5                  | < 5               | < 5               | 49 (1.13)          | 9 (0.11)           |                    |                    |
|               |                 | TIA             | 9 (0.05)     | 5 (0.03)    | 11 (3.21)            | < 5                  | < 5               | < 5               | 20 (0.46)          | 5 (0.06)           |                    |                    |
|               |                 | MI              | 9 (0.05)     | 10 (0.06)   | 8 (2.33)             | < 5                  | < 5               | < 5               | 25 (0.58)          | 6 (0.07)           |                    |                    |
|               |                 | HF              | 22 (0.11)    | 27 (0.17)   | 166 (48.37)          | < 5                  | < 5               | < 5               | 110 (2.54)         | 41 (0.50)          |                    |                    |
|               |                 | HS              | < 5          | < 5         | < 5                  | < 5                  | < 5               | < 5               | 7 (0.16)           | < 5                |                    |                    |
|               |                 | MP              | < 5          | < 5         | < 5                  | < 5                  | < 5               | < 5               | 7 (0.16)           | < 5                |                    |                    |
|               | 181 to 365 days | VTE             | 9 (0.05)     | 12 (0.08)   | 44 (12.82)           | < 5                  | < 5               | < 5               | 16 (0.37)          | 23 (0.28)          |                    |                    |
|               |                 | DVT             | < 5          | 5 (0.03)    | 20 (5.83)            | < 5                  | < 5               | < 5               | 9 (0.21)           | 14 (0.17)          |                    |                    |
|               |                 | PE              | 5 (0.03)     | 7 (0.04)    | 27 (7.87)            | < 5                  | < 5               | < 5               | 8 (0.18)           | 10 (0.12)          |                    |                    |
|               |                 | ATE             | 12 (0.06)    | 16 (0.10)   | 53 (15.44)           | < 5                  | < 5               | < 5               | 63 (1.45)          | 33 (0.40)          |                    |                    |
|               |                 | IS              | < 5          | < 5         | 31 (9.03)            | < 5                  | < 5               | < 5               | 35 (0.81)          | 11 (0.13)          |                    |                    |
|               |                 | TIA             | < 5          | < 5         | 12 (3.50)            | < 5                  | < 5               | < 5               | 16 (0.37)          | 13 (0.16)          |                    |                    |
|               |                 | MI              | 8 (0.04)     | 10 (0.06)   | 15 (4.37)            | < 5                  | < 5               | < 5               | 14 (0.32)          | 10 (0.12)          |                    |                    |
|               |                 | HF              | 20 (0.10)    | 31 (0.20)   | 259 (75.47)          | 5 (10.94)            | < 5               | < 5               | 81 (1.87)          | 41 (0.50)          |                    |                    |
|               |                 | HS              | < 5          | < 5         | < 5                  | < 5                  | < 5               | < 5               | < 5                | 5 (0.06)           |                    |                    |
|               |                 | MP              | < 5          | < 5         | < 5                  | < 5                  | < 5               | < 5               | < 5                | < 5                |                    |                    |
|               |                 | <b>Cohort 3</b> |              |             | <b>N = 1,510,401</b> | <b>N = 1,528,031</b> | <b>N = 96,423</b> | <b>N = 24,050</b> | <b>N = 417,996</b> | <b>N = 462,832</b> | <b>N = 869,497</b> | <b>N = 954,232</b> |
|               |                 | 0 to 30 days    | VTE          | 245 (1.62)  | 25 (0.16)            | 115 (11.93)          | < 5               | 27 (0.65)         | < 5                | 325 (3.74)         | 27 (0.28)          |                    |
| DVT           | 45 (0.30)       |                 | < 5          | 22 (2.28)   | < 5                  | 6 (0.14)             | < 5               | 90 (1.04)         | 7 (0.07)           |                    |                    |                    |
| PE            | 209 (1.38)      |                 | 22 (0.14)    | 96 (9.96)   | < 5                  | 22 (0.53)            | < 5               | 262 (3.01)        | 22 (0.23)          |                    |                    |                    |
| ATE           | 29 (0.19)       |                 | 10 (0.07)    | 119 (12.34) | < 5                  | < 5                  | < 5               | 213 (2.45)        | 14 (0.15)          |                    |                    |                    |
| IS            | < 5             |                 | < 5          | 70 (7.26)   | < 5                  | < 5                  | < 5               | 102 (1.17)        | 5 (0.05)           |                    |                    |                    |
| TIA           | 5 (0.03)        |                 | < 5          | 19 (1.97)   | < 5                  | < 5                  | < 5               | 20 (0.23)         | < 5                |                    |                    |                    |
| MI            | 20 (0.13)       |                 | 8 (0.05)     | 40 (4.15)   | < 5                  | < 5                  | < 5               | 97 (1.12)         | 7 (0.07)           |                    |                    |                    |
| HF            | 31 (0.21)       |                 | 18 (0.12)    | 380 (39.41) | < 5                  | < 5                  | < 5               | 364 (4.19)        | 23 (0.24)          |                    |                    |                    |
| HS            | < 5             |                 | < 5          | < 5         | < 5                  | < 5                  | < 5               | 20 (0.23)         | < 5                |                    |                    |                    |
| MP            | 9 (0.06)        |                 | < 5          | 6 (0.62)    | < 5                  | < 5                  | < 5               | 19 (0.22)         | < 5                |                    |                    |                    |
| 31 to 90 days | VTE             | 44 (0.29)       | < 5          | 50 (5.19)   | < 5                  | < 5                  | < 5               | 85 (0.98)         | 9 (0.09)           |                    |                    |                    |
|               | DVT             | 20 (0.13)       | < 5          | 28 (2.90)   | < 5                  | < 5                  | < 5               | 57 (0.66)         | 5 (0.05)           |                    |                    |                    |
|               | PE              | 27 (0.18)       | < 5          | 26 (2.70)   | < 5                  | < 5                  | < 5               | 38 (0.44)         | < 5                |                    |                    |                    |
|               | ATE             | 11 (0.07)       | 7 (0.05)     | 48 (4.98)   | < 5                  | < 5                  | < 5               | 109 (1.25)        | 10 (0.10)          |                    |                    |                    |
|               | IS              | < 5             | < 5          | 24 (2.49)   | < 5                  | < 5                  | < 5               | 54 (0.62)         | 6 (0.06)           |                    |                    |                    |
|               | TIA             | < 5             | < 5          | 7 (0.73)    | < 5                  | < 5                  | < 5               | 27 (0.31)         | < 5                |                    |                    |                    |

| Cohort          | Time window     | Outcome    | AURUM                |                      | CORIVA             |                   | GOLD               |                    | SIDIAP               |                    |
|-----------------|-----------------|------------|----------------------|----------------------|--------------------|-------------------|--------------------|--------------------|----------------------|--------------------|
|                 |                 |            | Unvaccinated         | Vaccinated           | Unvaccinated       | Vaccinated        | Unvaccinated       | Vaccinated         | Unvaccinated         | Vaccinated         |
|                 | 91 to 180 days  | MI         | 9 (0.06)             | < 5                  | 20 (2.07)          | < 5               | < 5                | < 5                | 36 (0.41)            | < 5                |
|                 |                 | HF         | 15 (0.10)            | 8 (0.05)             | 180 (18.67)        | < 5               | < 5                | < 5                | 137 (1.58)           | 13 (0.14)          |
|                 |                 | HS         | < 5                  | < 5                  | < 5                | < 5               | < 5                | < 5                | 7 (0.08)             | < 5                |
|                 |                 | MP         | 8 (0.05)             | < 5                  | 5 (0.52)           | < 5               | < 5                | < 5                | 8 (0.09)             | < 5                |
|                 |                 | VTE        | 24 (0.16)            | 8 (0.05)             | 43 (4.46)          | < 5               | < 5                | < 5                | 64 (0.74)            | 8 (0.08)           |
|                 |                 | DVT        | 11 (0.07)            | 6 (0.04)             | 26 (2.70)          | < 5               | < 5                | < 5                | 36 (0.41)            | 7 (0.07)           |
|                 |                 | PE         | 14 (0.09)            | < 5                  | 18 (1.87)          | < 5               | < 5                | < 5                | 32 (0.37)            | < 5                |
|                 |                 | ATE        | < 5                  | 7 (0.05)             | 44 (4.56)          | < 5               | < 5                | < 5                | 113 (1.30)           | 20 (0.21)          |
|                 |                 | IS         | < 5                  | < 5                  | 21 (2.18)          | < 5               | < 5                | < 5                | 57 (0.66)            | 12 (0.13)          |
|                 |                 | TIA        | < 5                  | < 5                  | 13 (1.35)          | < 5               | < 5                | < 5                | 22 (0.25)            | < 5                |
|                 |                 | MI         | < 5                  | < 5                  | 15 (1.56)          | < 5               | < 5                | < 5                | 37 (0.43)            | 6 (0.06)           |
|                 |                 | HF         | 11 (0.07)            | 6 (0.04)             | 216 (22.40)        | < 5               | < 5                | < 5                | 120 (1.38)           | 15 (0.16)          |
|                 | HS              | < 5        | < 5                  | < 5                  | < 5                | < 5               | < 5                | 9 (0.10)           | < 5                  |                    |
|                 | MP              | < 5        | < 5                  | < 5                  | < 5                | < 5               | < 5                | 8 (0.09)           | < 5                  |                    |
|                 | 181 to 365 days | VTE        | < 5                  | 9 (0.06)             | 72 (7.47)          | < 5               | < 5                | < 5                | 34 (0.39)            | 5 (0.05)           |
|                 | DVT             | < 5        | < 5                  | 39 (4.04)            | < 5                | < 5               | < 5                | 20 (0.23)          | < 5                  |                    |
|                 | PE              | < 5        | 6 (0.04)             | 37 (3.84)            | < 5                | < 5               | < 5                | 16 (0.18)          | < 5                  |                    |
|                 | ATE             | < 5        | < 5                  | 80 (8.30)            | < 5                | < 5               | < 5                | 51 (0.59)          | 18 (0.19)            |                    |
|                 | IS              | < 5        | < 5                  | 36 (3.73)            | < 5                | < 5               | < 5                | 24 (0.28)          | 9 (0.09)             |                    |
|                 | TIA             | < 5        | < 5                  | 19 (1.97)            | < 5                | < 5               | < 5                | 11 (0.13)          | < 5                  |                    |
|                 | MI              | < 5        | < 5                  | 32 (3.32)            | < 5                | < 5               | < 5                | 17 (0.20)          | 7 (0.07)             |                    |
|                 | HF              | 5 (0.03)   | < 5                  | 324 (33.60)          | < 5                | < 5               | < 5                | 62 (0.71)          | 13 (0.14)            |                    |
|                 | HS              | < 5        | < 5                  | 7 (0.73)             | < 5                | < 5               | < 5                | < 5                | < 5                  |                    |
|                 | MP              | < 5        | < 5                  | < 5                  | < 5                | < 5               | < 5                | < 5                | < 5                  |                    |
| <b>Cohort 4</b> |                 |            | <b>N = 2,027,763</b> | <b>N = 2,085,598</b> | <b>N = 147,545</b> | <b>N = 22,245</b> | <b>N = 469,876</b> | <b>N = 550,437</b> | <b>N = 1,061,634</b> | <b>N = 880,950</b> |
| 0 to 30 days    | VTE             | 334 (1.65) | 19 (0.09)            | 116 (7.86)           | < 5                | 36 (0.77)         | 7 (0.13)           | 350 (3.30)         | 38 (0.43)            |                    |
|                 | DVT             | 55 (0.27)  | 6 (0.03)             | 22 (1.49)            | < 5                | 6 (0.13)          | < 5                | 106 (1.00)         | 14 (0.16)            |                    |
|                 | PE              | 291 (1.44) | 13 (0.06)            | 97 (6.57)            | < 5                | 31 (0.66)         | 7 (0.13)           | 272 (2.56)         | 25 (0.28)            |                    |
|                 | ATE             | 26 (0.13)  | 5 (0.02)             | 116 (7.86)           | < 5                | < 5               | < 5                | 231 (2.18)         | 35 (0.40)            |                    |
|                 | IS              | < 5        | < 5                  | 69 (4.68)            | < 5                | < 5               | < 5                | 115 (1.08)         | 17 (0.19)            |                    |
|                 | TIA             | 6 (0.03)   | < 5                  | 18 (1.22)            | < 5                | < 5               | < 5                | 26 (0.24)          | < 5                  |                    |
|                 | MI              | 16 (0.08)  | < 5                  | 38 (2.58)            | < 5                | < 5               | < 5                | 96 (0.90)          | 15 (0.17)            |                    |
|                 | HF              | 28 (0.14)  | < 5                  | 364 (24.67)          | < 5                | < 5               | < 5                | 362 (3.41)         | 28 (0.32)            |                    |
|                 | HS              | < 5        | < 5                  | 5 (0.34)             | < 5                | < 5               | < 5                | 23 (0.22)          | < 5                  |                    |



| Cohort         | Time window     | Outcome   | AURUM        |             | CORIVA       |            | GOLD         |            | SIDIAP       |            |
|----------------|-----------------|-----------|--------------|-------------|--------------|------------|--------------|------------|--------------|------------|
|                |                 |           | Unvaccinated | Vaccinated  | Unvaccinated | Vaccinated | Unvaccinated | Vaccinated | Unvaccinated | Vaccinated |
| 31 to 90 days  | MP              | 12 (0.06) | < 5          | 7 (0.47)    | < 5          | < 5        | < 5          | 26 (0.24)  | 9 (0.10)     |            |
|                | VTE             | 58 (0.29) | 11 (0.05)    | 54 (3.66)   | < 5          | 5 (0.11)   | < 5          | 91 (0.86)  | 12 (0.14)    |            |
|                | DVT             | 21 (0.10) | < 5          | 32 (2.17)   | < 5          | < 5        | < 5          | 61 (0.57)  | 7 (0.08)     |            |
|                | PE              | 40 (0.20) | 7 (0.03)     | 26 (1.76)   | < 5          | < 5        | < 5          | 40 (0.38)  | 6 (0.07)     |            |
|                | ATE             | 12 (0.06) | < 5          | 46 (3.12)   | < 5          | < 5        | < 5          | 118 (1.11) | 18 (0.20)    |            |
|                | IS              | < 5       | < 5          | 24 (1.63)   | < 5          | < 5        | < 5          | 52 (0.49)  | 7 (0.08)     |            |
|                | TIA             | < 5       | < 5          | 6 (0.41)    | < 5          | < 5        | < 5          | 33 (0.31)  | 7 (0.08)     |            |
|                | MI              | 9 (0.04)  | < 5          | 19 (1.29)   | < 5          | < 5        | < 5          | 41 (0.39)  | < 5          |            |
|                | HF              | 14 (0.07) | 8 (0.04)     | 176 (11.93) | < 5          | < 5        | < 5          | 142 (1.34) | 17 (0.19)    |            |
|                | HS              | < 5       | < 5          | < 5         | < 5          | < 5        | < 5          | 8 (0.08)   | < 5          |            |
|                | MP              | 7 (0.03)  | < 5          | 5 (0.34)    | < 5          | < 5        | < 5          | 10 (0.09)  | < 5          |            |
| 91 to 180 days | VTE             | 26 (0.13) | 9 (0.04)     | 49 (3.32)   | < 5          | < 5        | < 5          | 71 (0.67)  | 11 (0.12)    |            |
|                | DVT             | 10 (0.05) | 7 (0.03)     | 31 (2.10)   | < 5          | < 5        | < 5          | 42 (0.40)  | 6 (0.07)     |            |
|                | PE              | 17 (0.08) | < 5          | 19 (1.29)   | < 5          | < 5        | < 5          | 32 (0.30)  | 6 (0.07)     |            |
|                | ATE             | < 5       | 5 (0.02)     | 41 (2.78)   | < 5          | < 5        | < 5          | 128 (1.21) | 21 (0.24)    |            |
|                | IS              | < 5       | < 5          | 19 (1.29)   | < 5          | < 5        | < 5          | 65 (0.61)  | 11 (0.12)    |            |
|                | TIA             | < 5       | < 5          | 12 (0.81)   | < 5          | < 5        | < 5          | 29 (0.27)  | < 5          |            |
|                | MI              | < 5       | < 5          | 14 (0.95)   | < 5          | < 5        | < 5          | 37 (0.35)  | 7 (0.08)     |            |
|                | HF              | 10 (0.05) | < 5          | 208 (14.10) | < 5          | < 5        | < 5          | 139 (1.31) | 19 (0.22)    |            |
|                | HS              | < 5       | < 5          | < 5         | < 5          | < 5        | < 5          | 14 (0.13)  | < 5          |            |
|                | MP              | < 5       | < 5          | 5 (0.34)    | < 5          | < 5        | < 5          | 11 (0.10)  | < 5          |            |
|                | 181 to 365 days | VTE       | < 5          | < 5         | 77 (5.22)    | < 5        | < 5          | < 5        | 46 (0.43)    | 9 (0.10)   |
| DVT            |                 | < 5       | < 5          | 46 (3.12)   | < 5          | < 5        | < 5          | 33 (0.31)  | 5 (0.06)     |            |
| PE             |                 | < 5       | < 5          | 35 (2.37)   | < 5          | < 5        | < 5          | 14 (0.13)  | < 5          |            |
| ATE            |                 | < 5       | < 5          | 73 (4.95)   | < 5          | < 5        | < 5          | 54 (0.51)  | 22 (0.25)    |            |
| IS             |                 | < 5       | < 5          | 33 (2.24)   | < 5          | < 5        | < 5          | 27 (0.25)  | 15 (0.17)    |            |
| TIA            |                 | < 5       | < 5          | 19 (1.29)   | < 5          | < 5        | < 5          | 12 (0.11)  | < 5          |            |
| MI             |                 | < 5       | < 5          | 27 (1.83)   | < 5          | < 5        | < 5          | 16 (0.15)  | 7 (0.08)     |            |
| HF             |                 | < 5       | < 5          | 301 (20.40) | < 5          | < 5        | < 5          | 57 (0.54)  | 11 (0.12)    |            |
| HS             |                 | < 5       | < 5          | 8 (0.54)    | < 5          | < 5        | < 5          | < 5        | < 5          |            |
| MP             |                 | < 5       | < 5          | 5 (0.34)    | < 5          | < 5        | < 5          | 7 (0.07)   | < 5          |            |

VTE = Venous thromboembolism (DVT + PE), DVT = Deep vein thrombosis, PE = Pulmonary embolism, ATE = Arterial thrombosis/thromboembolism (IS + TIA + MI), IS = Ischemic stroke, TIA = Transient ischemic attack, MI = Myocardial infarction, HF = Heart failure, HS = Hemorrhagic stroke, MP = Myocarditis or Pericarditis

**Table S27: Number of records (and risk per 10,000 individuals) for post COVID-19 cardiac and thromboembolic complications, across cohorts and databases, stratified by exposure status (any COVID-19 vaccine). Only first outcome after COVID-19 captured.**

| Cohort          | Time window | Outcome   | AURUM              |                    | CORIVA            |                   | GOLD               |                    | SIDIAP             |                   |
|-----------------|-------------|-----------|--------------------|--------------------|-------------------|-------------------|--------------------|--------------------|--------------------|-------------------|
|                 |             |           | Unvaccinated       | Vaccinated         | Unvaccinated      | Vaccinated        | Unvaccinated       | Vaccinated         | Unvaccinated       | Vaccinated        |
| <b>Cohort 1</b> |             |           | <b>N = 346,674</b> | <b>N = 552,602</b> | <b>N = 23,982</b> | <b>N = 26,736</b> | <b>N = 169,100</b> | <b>N = 118,507</b> | <b>N = 223,962</b> | <b>N = 89,941</b> |
| 0 to 30 days    | VTE         | 93 (2.68) | 117 (2.12)         | 77 (32.11)         | 45 (16.83)        | 8 (0.47)          | 8 (0.68)           | 74 (3.30)          | 96 (10.67)         |                   |
|                 | DVT         | 22 (0.63) | 27 (0.49)          | 12 (5.00)          | 14 (5.24)         | < 5               | < 5                | 19 (0.85)          | 29 (3.22)          |                   |
|                 | PE          | 75 (2.16) | 95 (1.72)          | 67 (27.94)         | 33 (12.34)        | 7 (0.41)          | 7 (0.59)           | 59 (2.63)          | 77 (8.56)          |                   |
|                 | ATE         | 22 (0.63) | 70 (1.27)          | 110 (45.87)        | 81 (30.30)        | 6 (0.35)          | 7 (0.59)           | 77 (3.44)          | 208 (23.13)        |                   |
|                 | IS          | 8 (0.23)  | 5 (0.09)           | 64 (26.69)         | 37 (13.84)        | < 5               | < 5                | 45 (2.01)          | 116 (12.90)        |                   |
|                 | TIA         | < 5       | 18 (0.33)          | 20 (8.34)          | 18 (6.73)         | < 5               | < 5                | 7 (0.31)           | 41 (4.56)          |                   |
|                 | MI          | 11 (0.32) | 46 (0.83)          | 35 (14.59)         | 35 (13.09)        | < 5               | 5 (0.42)           | 27 (1.21)          | 63 (7.00)          |                   |
|                 | HF          | 59 (1.70) | 198 (3.58)         | 395 (164.71)       | 299 (111.83)      | 10 (0.59)         | 9 (0.76)           | 302 (13.48)        | 640 (71.16)        |                   |
|                 | HS          | < 5       | 7 (0.13)           | < 5                | < 5               | < 5               | < 5                | 7 (0.31)           | 14 (1.56)          |                   |
|                 | MP          | < 5       | < 5                | < 5                | < 5               | < 5               | < 5                | < 5                | < 5                |                   |
| 31 to 90 days   | VTE         | 19 (0.55) | 39 (0.71)          | 35 (14.59)         | 29 (10.85)        | < 5               | < 5                | 15 (0.67)          | 45 (5.00)          |                   |
|                 | DVT         | 10 (0.29) | 15 (0.27)          | 19 (7.92)          | 15 (5.61)         | < 5               | < 5                | 9 (0.40)           | 29 (3.22)          |                   |
|                 | PE          | 9 (0.26)  | 25 (0.45)          | 20 (8.34)          | 14 (5.24)         | < 5               | < 5                | 6 (0.27)           | 20 (2.22)          |                   |
|                 | ATE         | 5 (0.14)  | 43 (0.78)          | 29 (12.09)         | 44 (16.46)        | < 5               | < 5                | 39 (1.74)          | 127 (14.12)        |                   |
|                 | IS          | < 5       | < 5                | 16 (6.67)          | 19 (7.11)         | < 5               | < 5                | 20 (0.89)          | 70 (7.78)          |                   |
|                 | TIA         | < 5       | 19 (0.34)          | 8 (3.34)           | 17 (6.36)         | < 5               | < 5                | 13 (0.58)          | 32 (3.56)          |                   |
|                 | MI          | < 5       | 20 (0.36)          | 10 (4.17)          | 11 (4.11)         | < 5               | < 5                | 9 (0.40)           | 29 (3.22)          |                   |
|                 | HF          | 30 (0.87) | 109 (1.97)         | 134 (55.88)        | 162 (60.59)       | < 5               | 8 (0.68)           | 85 (3.80)          | 290 (32.24)        |                   |
|                 | HS          | < 5       | < 5                | < 5                | < 5               | < 5               | < 5                | < 5                | 12 (1.33)          |                   |
|                 | MP          | < 5       | < 5                | < 5                | < 5               | < 5               | < 5                | < 5                | < 5                |                   |
| 91 to 180 days  | VTE         | 10 (0.29) | 18 (0.33)          | 16 (6.67)          | 29 (10.85)        | < 5               | < 5                | 18 (0.80)          | 35 (3.89)          |                   |
|                 | DVT         | 5 (0.14)  | 8 (0.14)           | 9 (3.75)           | 16 (5.98)         | < 5               | < 5                | 7 (0.31)           | 19 (2.11)          |                   |
|                 | PE          | 5 (0.14)  | 10 (0.18)          | 9 (3.75)           | 15 (5.61)         | < 5               | < 5                | 11 (0.49)          | 18 (2.00)          |                   |
|                 | ATE         | 11 (0.32) | 28 (0.51)          | 28 (11.68)         | 45 (16.83)        | < 5               | 6 (0.51)           | 25 (1.12)          | 104 (11.56)        |                   |
|                 | IS          | < 5       | 8 (0.14)           | 13 (5.42)          | 19 (7.11)         | < 5               | < 5                | 13 (0.58)          | 57 (6.34)          |                   |
|                 | TIA         | 5 (0.14)  | 12 (0.22)          | 8 (3.34)           | 15 (5.61)         | < 5               | < 5                | 7 (0.31)           | 34 (3.78)          |                   |
|                 | MI          | 5 (0.14)  | 8 (0.14)           | 9 (3.75)           | 16 (5.98)         | < 5               | 5 (0.42)           | 6 (0.27)           | 23 (2.56)          |                   |
|                 | HF          | 35 (1.01) | 89 (1.61)          | 143 (59.63)        | 203 (75.93)       | < 5               | 5 (0.42)           | 81 (3.62)          | 228 (25.35)        |                   |
|                 | HS          | < 5       | < 5                | < 5                | < 5               | < 5               | < 5                | < 5                | < 5                |                   |
|                 | MP          | < 5       | < 5                | < 5                | < 5               | < 5               | < 5                | < 5                | < 5                |                   |

| Cohort          | Time window     | Outcome | AURUM                |                      | CORIVA            |                  | GOLD               |                    | SIDIAP             |                    |
|-----------------|-----------------|---------|----------------------|----------------------|-------------------|------------------|--------------------|--------------------|--------------------|--------------------|
|                 |                 |         | Unvaccinated         | Vaccinated           | Unvaccinated      | Vaccinated       | Unvaccinated       | Vaccinated         | Unvaccinated       | Vaccinated         |
|                 | 181 to 365 days | VTE     | 9 (0.26)             | 11 (0.20)            | 29 (12.09)        | 27 (10.10)       | < 5                | < 5                | 5 (0.22)           | 11 (1.22)          |
|                 |                 | DVT     | < 5                  | 6 (0.11)             | 10 (4.17)         | 17 (6.36)        | < 5                | < 5                | < 5                | 7 (0.78)           |
|                 |                 | PE      | 5 (0.14)             | 5 (0.09)             | 24 (10.01)        | 11 (4.11)        | < 5                | < 5                | < 5                | < 5                |
|                 |                 | ATE     | 10 (0.29)            | 23 (0.42)            | 45 (18.76)        | 74 (27.68)       | < 5                | < 5                | 35 (1.56)          | 39 (4.34)          |
|                 |                 | IS      | < 5                  | 6 (0.11)             | 26 (10.84)        | 34 (12.72)       | < 5                | < 5                | 18 (0.80)          | 24 (2.67)          |
|                 |                 | TIA     | 6 (0.17)             | 7 (0.13)             | 15 (6.25)         | 29 (10.85)       | < 5                | < 5                | 9 (0.40)           | 9 (1.00)           |
|                 |                 | MI      | < 5                  | 11 (0.20)            | 10 (4.17)         | 17 (6.36)        | < 5                | < 5                | 8 (0.36)           | 7 (0.78)           |
|                 |                 | HF      | 36 (1.04)            | 53 (0.96)            | 213 (88.82)       | 292 (109.22)     | < 5                | 6 (0.51)           | 75 (3.35)          | 117 (13.01)        |
|                 |                 | HS      | < 5                  | < 5                  | < 5               | < 5              | < 5                | < 5                | < 5                | 7 (0.78)           |
|                 |                 | MP      | < 5                  | < 5                  | < 5               | < 5              | < 5                | < 5                | < 5                | < 5                |
| <b>Cohort 2</b> |                 |         | <b>N = 1,975,726</b> | <b>N = 1,563,569</b> | <b>N = 34,317</b> | <b>N = 4,572</b> | <b>N = 583,399</b> | <b>N = 486,619</b> | <b>N = 433,151</b> | <b>N = 819,590</b> |
|                 | 0 to 30 days    | VTE     | 241 (1.22)           | 220 (1.41)           | 79 (23.02)        | 7 (15.31)        | 31 (0.53)          | 24 (0.49)          | 258 (5.96)         | 400 (4.88)         |
|                 |                 | DVT     | 41 (0.21)            | 65 (0.42)            | 12 (3.50)         | < 5              | 8 (0.14)           | 5 (0.10)           | 63 (1.45)          | 165 (2.01)         |
|                 |                 | PE      | 204 (1.03)           | 165 (1.06)           | 69 (20.11)        | 5 (10.94)        | 24 (0.41)          | 19 (0.39)          | 213 (4.92)         | 269 (3.28)         |
|                 |                 | ATE     | 41 (0.21)            | 104 (0.67)           | 110 (32.05)       | 5 (10.94)        | < 5                | 6 (0.12)           | 173 (3.99)         | 669 (8.16)         |
|                 |                 | IS      | 7 (0.04)             | 14 (0.09)            | 68 (19.82)        | < 5              | < 5                | < 5                | 96 (2.22)          | 346 (4.22)         |
|                 |                 | TIA     | 8 (0.04)             | 24 (0.15)            | 18 (5.25)         | < 5              | < 5                | < 5                | 17 (0.39)          | 122 (1.49)         |
|                 |                 | MI      | 26 (0.13)            | 68 (0.43)            | 35 (10.20)        | < 5              | < 5                | 6 (0.12)           | 64 (1.48)          | 239 (2.92)         |
|                 |                 | HF      | 45 (0.23)            | 146 (0.93)           | 364 (106.07)      | 23 (50.31)       | 5 (0.09)           | 13 (0.27)          | 378 (8.73)         | 1,331 (16.24)      |
|                 |                 | HS      | 6 (0.03)             | 5 (0.03)             | < 5               | < 5              | < 5                | < 5                | 18 (0.42)          | 77 (0.94)          |
|                 |                 | MP      | 12 (0.06)            | 7 (0.04)             | < 5               | < 5              | < 5                | < 5                | 14 (0.32)          | 37 (0.45)          |
|                 | 31 to 90 days   | VTE     | 41 (0.21)            | 75 (0.48)            | 28 (8.16)         | 5 (10.94)        | < 5                | 9 (0.18)           | 56 (1.29)          | 187 (2.28)         |
|                 |                 | DVT     | 23 (0.12)            | 32 (0.20)            | 15 (4.37)         | 5 (10.94)        | < 5                | 5 (0.10)           | 30 (0.69)          | 119 (1.45)         |
|                 |                 | PE      | 22 (0.11)            | 45 (0.29)            | 16 (4.66)         | < 5              | < 5                | < 5                | 31 (0.72)          | 87 (1.06)          |
|                 |                 | ATE     | 18 (0.09)            | 92 (0.59)            | 29 (8.45)         | < 5              | < 5                | 9 (0.18)           | 84 (1.94)          | 437 (5.33)         |
|                 |                 | IS      | < 5                  | 11 (0.07)            | 18 (5.25)         | < 5              | < 5                | < 5                | 43 (0.99)          | 231 (2.82)         |
|                 |                 | TIA     | < 5                  | 33 (0.21)            | < 5               | < 5              | < 5                | 6 (0.12)           | 23 (0.53)          | 115 (1.40)         |
|                 |                 | MI      | 13 (0.07)            | 50 (0.32)            | 11 (3.21)         | < 5              | < 5                | < 5                | 25 (0.58)          | 113 (1.38)         |
|                 |                 | HF      | 27 (0.14)            | 99 (0.63)            | 137 (39.92)       | 19 (41.56)       | < 5                | 7 (0.14)           | 132 (3.05)         | 622 (7.59)         |
|                 |                 | HS      | < 5                  | < 5                  | < 5               | < 5              | < 5                | < 5                | 7 (0.16)           | 27 (0.33)          |
|                 |                 | MP      | 6 (0.03)             | < 5                  | < 5               | < 5              | < 5                | < 5                | < 5                | 8 (0.10)           |
|                 | 91 to 180 days  | VTE     | 25 (0.13)            | 37 (0.24)            | 21 (6.12)         | 6 (13.12)        | 6 (0.10)           | < 5                | 53 (1.22)          | 109 (1.33)         |
|                 |                 | DVT     | 12 (0.06)            | 21 (0.13)            | 10 (2.91)         | < 5              | < 5                | < 5                | 29 (0.67)          | 71 (0.87)          |
|                 |                 | PE      | 13 (0.07)            | 19 (0.12)            | 12 (3.50)         | < 5              | < 5                | < 5                | 27 (0.62)          | 46 (0.56)          |

| Cohort        | Time window     | Outcome  | AURUM        |            | CORIVA               |                      | GOLD              |                   | SIDIAP             |                    |                    |                    |
|---------------|-----------------|----------|--------------|------------|----------------------|----------------------|-------------------|-------------------|--------------------|--------------------|--------------------|--------------------|
|               |                 |          | Unvaccinated | Vaccinated | Unvaccinated         | Vaccinated           | Unvaccinated      | Vaccinated        | Unvaccinated       | Vaccinated         |                    |                    |
|               |                 | ATE      | 15 (0.08)    | 43 (0.28)  | 31 (9.03)            | < 5                  | < 5               | < 5               | 81 (1.87)          | 394 (4.81)         |                    |                    |
|               |                 | IS       | < 5          | < 5        | 14 (4.08)            | < 5                  | < 5               | < 5               | 43 (0.99)          | 202 (2.46)         |                    |                    |
|               |                 | TIA      | 8 (0.04)     | 18 (0.12)  | 11 (3.21)            | < 5                  | < 5               | < 5               | 19 (0.44)          | 109 (1.33)         |                    |                    |
|               |                 | MI       | 8 (0.04)     | 25 (0.16)  | 8 (2.33)             | < 5                  | < 5               | < 5               | 22 (0.51)          | 104 (1.27)         |                    |                    |
|               |                 | HF       | 22 (0.11)    | 65 (0.42)  | 149 (43.42)          | 20 (43.74)           | < 5               | < 5               | 100 (2.31)         | 534 (6.52)         |                    |                    |
|               |                 | HS       | < 5          | < 5        | < 5                  | < 5                  | < 5               | < 5               | 7 (0.16)           | 35 (0.43)          |                    |                    |
|               |                 | MP       | < 5          | < 5        | < 5                  | < 5                  | < 5               | < 5               | 7 (0.16)           | 9 (0.11)           |                    |                    |
|               | 181 to 365 days | VTE      | 8 (0.04)     | 12 (0.08)  | 30 (8.74)            | 5 (10.94)            | < 5               | < 5               | 14 (0.32)          | 52 (0.63)          |                    |                    |
|               |                 | DVT      | < 5          | 5 (0.03)   | 15 (4.37)            | < 5                  | < 5               | < 5               | 8 (0.18)           | 36 (0.44)          |                    |                    |
|               |                 | PE       | < 5          | 8 (0.05)   | 18 (5.25)            | < 5                  | < 5               | < 5               | 7 (0.16)           | 19 (0.23)          |                    |                    |
|               |                 | ATE      | 10 (0.05)    | 17 (0.11)  | 44 (12.82)           | < 5                  | < 5               | < 5               | 53 (1.22)          | 151 (1.84)         |                    |                    |
|               |                 | IS       | < 5          | < 5        | 25 (7.29)            | < 5                  | < 5               | < 5               | 30 (0.69)          | 71 (0.87)          |                    |                    |
|               |                 | TIA      | < 5          | 5 (0.03)   | 12 (3.50)            | < 5                  | < 5               | < 5               | 14 (0.32)          | 46 (0.56)          |                    |                    |
|               |                 | MI       | 6 (0.03)     | 10 (0.06)  | 11 (3.21)            | < 5                  | < 5               | < 5               | 11 (0.25)          | 45 (0.55)          |                    |                    |
|               |                 | HF       | 19 (0.10)    | 34 (0.22)  | 210 (61.19)          | 29 (63.43)           | < 5               | < 5               | 72 (1.66)          | 209 (2.55)         |                    |                    |
|               |                 | HS       | < 5          | < 5        | < 5                  | < 5                  | < 5               | < 5               | < 5                | 10 (0.12)          |                    |                    |
|               |                 | MP       | < 5          | < 5        | < 5                  | < 5                  | < 5               | < 5               | < 5                | < 5                |                    |                    |
|               |                 | Cohort 3 |              |            | <b>N = 1,510,401</b> | <b>N = 1,528,031</b> | <b>N = 96,423</b> | <b>N = 24,050</b> | <b>N = 417,996</b> | <b>N = 462,832</b> | <b>N = 869,497</b> | <b>N = 954,232</b> |
|               |                 |          | 0 to 30 days | VTE        | 245 (1.62)           | 142 (0.93)           | 115 (11.93)       | 9 (3.74)          | 27 (0.65)          | 17 (0.37)          | 325 (3.74)         | 180 (1.89)         |
| DVT           | 45 (0.30)       |          |              | 41 (0.27)  | 22 (2.28)            | 7 (2.91)             | 6 (0.14)          | < 5               | 90 (1.04)          | 78 (0.82)          |                    |                    |
| PE            | 209 (1.38)      |          |              | 105 (0.69) | 96 (9.96)            | < 5                  | 22 (0.53)         | 13 (0.28)         | 262 (3.01)         | 118 (1.24)         |                    |                    |
| ATE           | 29 (0.19)       |          |              | 49 (0.32)  | 119 (12.34)          | 12 (4.99)            | < 5               | 12 (0.26)         | 213 (2.45)         | 275 (2.88)         |                    |                    |
| IS            | < 5             |          |              | 5 (0.03)   | 70 (7.26)            | 9 (3.74)             | < 5               | < 5               | 102 (1.17)         | 130 (1.36)         |                    |                    |
| TIA           | 5 (0.03)        |          |              | 17 (0.11)  | 19 (1.97)            | < 5                  | < 5               | < 5               | 20 (0.23)          | 53 (0.56)          |                    |                    |
| MI            | 20 (0.13)       |          |              | 27 (0.18)  | 40 (4.15)            | < 5                  | < 5               | 9 (0.19)          | 97 (1.12)          | 113 (1.18)         |                    |                    |
| HF            | 31 (0.21)       |          |              | 38 (0.25)  | 380 (39.41)          | 23 (9.56)            | < 5               | < 5               | 364 (4.19)         | 256 (2.68)         |                    |                    |
| HS            | < 5             |          |              | < 5        | < 5                  | < 5                  | < 5               | < 5               | 20 (0.23)          | 35 (0.37)          |                    |                    |
| MP            | 9 (0.06)        |          |              | 6 (0.04)   | 6 (0.62)             | < 5                  | < 5               | < 5               | 19 (0.22)          | 20 (0.21)          |                    |                    |
| 31 to 90 days | VTE             |          | 41 (0.27)    | 46 (0.30)  | 45 (4.67)            | 10 (4.16)            | < 5               | 6 (0.13)          | 81 (0.93)          | 90 (0.94)          |                    |                    |
|               | DVT             |          | 19 (0.13)    | 27 (0.18)  | 25 (2.59)            | 7 (2.91)             | < 5               | < 5               | 54 (0.62)          | 60 (0.63)          |                    |                    |
|               | PE              |          | 25 (0.17)    | 19 (0.12)  | 23 (2.39)            | < 5                  | < 5               | < 5               | 36 (0.41)          | 37 (0.39)          |                    |                    |
|               | ATE             |          | 11 (0.07)    | 33 (0.22)  | 45 (4.67)            | 8 (3.33)             | < 5               | 8 (0.17)          | 108 (1.24)         | 207 (2.17)         |                    |                    |
|               | IS              |          | < 5          | < 5        | 22 (2.28)            | < 5                  | < 5               | < 5               | 54 (0.62)          | 87 (0.91)          |                    |                    |
|               |                 |          | TIA          | < 5        | 14 (0.09)            | 7 (0.73)             | < 5               | < 5               | 27 (0.31)          | 35 (0.37)          |                    |                    |

| Cohort          | Time window     | Outcome    | AURUM                |                      | CORIVA             |                   | GOLD               |                    | SIDIAP               |                    |
|-----------------|-----------------|------------|----------------------|----------------------|--------------------|-------------------|--------------------|--------------------|----------------------|--------------------|
|                 |                 |            | Unvaccinated         | Vaccinated           | Unvaccinated       | Vaccinated        | Unvaccinated       | Vaccinated         | Unvaccinated         | Vaccinated         |
|                 | 91 to 180 days  | MI         | 9 (0.06)             | 16 (0.10)            | 18 (1.87)          | < 5               | < 5                | 5 (0.11)           | 35 (0.40)            | 93 (0.97)          |
|                 |                 | HF         | 15 (0.10)            | 26 (0.17)            | 166 (17.22)        | 25 (10.40)        | < 5                | < 5                | 130 (1.50)           | 154 (1.61)         |
|                 |                 | HS         | < 5                  | < 5                  | < 5                | < 5               | < 5                | < 5                | 7 (0.08)             | 19 (0.20)          |
|                 |                 | MP         | 8 (0.05)             | 8 (0.05)             | < 5                | < 5               | < 5                | < 5                | 8 (0.09)             | 11 (0.12)          |
|                 |                 | VTE        | 23 (0.15)            | 25 (0.16)            | 34 (3.53)          | 11 (4.57)         | < 5                | < 5                | 57 (0.66)            | 92 (0.96)          |
|                 |                 | DVT        | 10 (0.07)            | 15 (0.10)            | 20 (2.07)          | 7 (2.91)          | < 5                | < 5                | 33 (0.38)            | 61 (0.64)          |
|                 |                 | PE         | 14 (0.09)            | 13 (0.09)            | 15 (1.56)          | < 5               | < 5                | < 5                | 28 (0.32)            | 34 (0.36)          |
|                 |                 | ATE        | < 5                  | 28 (0.18)            | 40 (4.15)          | 8 (3.33)          | < 5                | < 5                | 102 (1.17)           | 199 (2.09)         |
|                 |                 | IS         | < 5                  | < 5                  | 20 (2.07)          | < 5               | < 5                | < 5                | 49 (0.56)            | 92 (0.96)          |
|                 |                 | TIA        | < 5                  | 9 (0.06)             | 13 (1.35)          | < 5               | < 5                | < 5                | 20 (0.23)            | 47 (0.49)          |
|                 |                 | MI         | < 5                  | 18 (0.12)            | 13 (1.35)          | < 5               | < 5                | < 5                | 35 (0.40)            | 69 (0.72)          |
|                 |                 | HF         | 11 (0.07)            | 12 (0.08)            | 194 (20.12)        | 27 (11.23)        | < 5                | < 5                | 110 (1.27)           | 133 (1.39)         |
|                 |                 | HS         | < 5                  | < 5                  | < 5                | < 5               | < 5                | < 5                | 9 (0.10)             | 13 (0.14)          |
|                 |                 | MP         | < 5                  | < 5                  | < 5                | < 5               | < 5                | < 5                | 8 (0.09)             | 14 (0.15)          |
|                 | 181 to 365 days | VTE        | < 5                  | 9 (0.06)             | 50 (5.19)          | 16 (6.65)         | < 5                | < 5                | 31 (0.36)            | 19 (0.20)          |
|                 | DVT             | < 5        | < 5                  | 29 (3.01)            | 13 (5.41)          | < 5               | < 5                | 18 (0.21)          | 14 (0.15)            |                    |
|                 | PE              | < 5        | 6 (0.04)             | 24 (2.49)            | < 5                | < 5               | < 5                | 15 (0.17)          | 6 (0.06)             |                    |
|                 | ATE             | < 5        | < 5                  | 66 (6.84)            | 7 (2.91)           | < 5               | < 5                | 42 (0.48)          | 58 (0.61)            |                    |
|                 | IS              | < 5        | < 5                  | 30 (3.11)            | < 5                | < 5               | < 5                | 19 (0.22)          | 22 (0.23)            |                    |
|                 | TIA             | < 5        | < 5                  | 17 (1.76)            | < 5                | < 5               | < 5                | 10 (0.12)          | 7 (0.07)             |                    |
|                 | MI              | < 5        | < 5                  | 24 (2.49)            | < 5                | < 5               | < 5                | 14 (0.16)          | 32 (0.34)            |                    |
|                 | HF              | 5 (0.03)   | < 5                  | 262 (27.17)          | 31 (12.89)         | < 5               | < 5                | 54 (0.62)          | 36 (0.38)            |                    |
|                 | HS              | < 5        | < 5                  | 7 (0.73)             | < 5                | < 5               | < 5                | < 5                | < 5                  |                    |
|                 | MP              | < 5        | < 5                  | < 5                  | < 5                | < 5               | < 5                | < 5                | < 5                  |                    |
| <b>Cohort 4</b> |                 |            | <b>N = 2,027,763</b> | <b>N = 2,085,598</b> | <b>N = 147,545</b> | <b>N = 22,245</b> | <b>N = 469,876</b> | <b>N = 550,437</b> | <b>N = 1,061,634</b> | <b>N = 880,950</b> |
| 0 to 30 days    | VTE             | 334 (1.65) | 50 (0.24)            | 116 (7.86)           | < 5                | 36 (0.77)         | 11 (0.20)          | 350 (3.30)         | 98 (1.11)            |                    |
|                 | DVT             | 55 (0.27)  | 17 (0.08)            | 22 (1.49)            | < 5                | 6 (0.13)          | < 5                | 106 (1.00)         | 48 (0.54)            |                    |
|                 | PE              | 291 (1.44) | 34 (0.16)            | 97 (6.57)            | < 5                | 31 (0.66)         | 8 (0.15)           | 272 (2.56)         | 55 (0.62)            |                    |
|                 | ATE             | 26 (0.13)  | 8 (0.04)             | 116 (7.86)           | 10 (4.50)          | < 5               | < 5                | 231 (2.18)         | 95 (1.08)            |                    |
|                 | IS              | < 5        | < 5                  | 69 (4.68)            | < 5                | < 5               | < 5                | 115 (1.08)         | 47 (0.53)            |                    |
|                 | TIA             | 6 (0.03)   | < 5                  | 18 (1.22)            | < 5                | < 5               | < 5                | 26 (0.24)          | 12 (0.14)            |                    |
|                 | MI              | 16 (0.08)  | < 5                  | 38 (2.58)            | < 5                | < 5               | < 5                | 96 (0.90)          | 39 (0.44)            |                    |
|                 | HF              | 28 (0.14)  | < 5                  | 364 (24.67)          | 17 (7.64)          | < 5               | < 5                | 362 (3.41)         | 75 (0.85)            |                    |
|                 | HS              | < 5        | < 5                  | 5 (0.34)             | < 5                | < 5               | < 5                | 23 (0.22)          | 13 (0.15)            |                    |

| Cohort          | Time window | Outcome | AURUM        |            | CORIVA       |            | GOLD         |            | SIDIAP       |            |
|-----------------|-------------|---------|--------------|------------|--------------|------------|--------------|------------|--------------|------------|
|                 |             |         | Unvaccinated | Vaccinated | Unvaccinated | Vaccinated | Unvaccinated | Vaccinated | Unvaccinated | Vaccinated |
| 31 to 90 days   |             | MP      | 12 (0.06)    | 8 (0.04)   | 7 (0.47)     | < 5        | < 5          | < 5        | 26 (0.24)    | 17 (0.19)  |
|                 |             | VTE     | 55 (0.27)    | 22 (0.11)  | 49 (3.32)    | < 5        | 5 (0.11)     | < 5        | 86 (0.81)    | 48 (0.54)  |
|                 |             | DVT     | 20 (0.10)    | 12 (0.06)  | 29 (1.97)    | < 5        | < 5          | < 5        | 57 (0.54)    | 32 (0.36)  |
|                 |             | PE      | 38 (0.19)    | 10 (0.05)  | 23 (1.56)    | < 5        | < 5          | < 5        | 38 (0.36)    | 17 (0.19)  |
|                 |             | ATE     | 12 (0.06)    | 9 (0.04)   | 43 (2.91)    | 5 (2.25)   | < 5          | < 5        | 117 (1.10)   | 75 (0.85)  |
|                 |             | IS      | < 5          | < 5        | 22 (1.49)    | < 5        | < 5          | < 5        | 52 (0.49)    | 30 (0.34)  |
|                 |             | TIA     | < 5          | < 5        | 6 (0.41)     | < 5        | < 5          | < 5        | 33 (0.31)    | 23 (0.26)  |
|                 |             | MI      | 9 (0.04)     | 7 (0.03)   | 17 (1.15)    | < 5        | < 5          | < 5        | 40 (0.38)    | 25 (0.28)  |
|                 |             | HF      | 14 (0.07)    | 9 (0.04)   | 162 (10.98)  | 13 (5.84)  | < 5          | < 5        | 135 (1.27)   | 47 (0.53)  |
|                 |             | HS      | < 5          | < 5        | < 5          | < 5        | < 5          | < 5        | 8 (0.08)     | 5 (0.06)   |
| 91 to 180 days  |             | MP      | 7 (0.03)     | < 5        | < 5          | < 5        | < 5          | < 5        | 10 (0.09)    | 11 (0.12)  |
|                 |             | VTE     | 25 (0.12)    | 9 (0.04)   | 40 (2.71)    | < 5        | < 5          | < 5        | 65 (0.61)    | 52 (0.59)  |
|                 |             | DVT     | 9 (0.04)     | 7 (0.03)   | 25 (1.69)    | < 5        | < 5          | < 5        | 39 (0.37)    | 33 (0.37)  |
|                 |             | PE      | 17 (0.08)    | < 5        | 16 (1.08)    | < 5        | < 5          | < 5        | 29 (0.27)    | 22 (0.25)  |
|                 |             | ATE     | < 5          | 6 (0.03)   | 38 (2.58)    | 6 (2.70)   | < 5          | < 5        | 116 (1.09)   | 86 (0.98)  |
|                 |             | IS      | < 5          | < 5        | 18 (1.22)    | < 5        | < 5          | < 5        | 57 (0.54)    | 42 (0.48)  |
|                 |             | TIA     | < 5          | < 5        | 12 (0.81)    | < 5        | < 5          | < 5        | 26 (0.24)    | 17 (0.19)  |
|                 |             | MI      | < 5          | < 5        | 12 (0.81)    | < 5        | < 5          | < 5        | 35 (0.33)    | 27 (0.31)  |
|                 |             | HF      | 10 (0.05)    | < 5        | 187 (12.67)  | 18 (8.09)  | < 5          | < 5        | 127 (1.20)   | 54 (0.61)  |
|                 |             | HS      | < 5          | < 5        | < 5          | < 5        | < 5          | < 5        | 13 (0.12)    | 6 (0.07)   |
| 181 to 365 days |             | MP      | < 5          | < 5        | < 5          | < 5        | < 5          | < 5        | 11 (0.10)    | 6 (0.07)   |
|                 |             | VTE     | < 5          | < 5        | 53 (3.59)    | < 5        | < 5          | < 5        | 42 (0.40)    | 8 (0.09)   |
|                 |             | DVT     | < 5          | < 5        | 33 (2.24)    | < 5        | < 5          | < 5        | 30 (0.28)    | 6 (0.07)   |
|                 |             | PE      | < 5          | < 5        | 23 (1.56)    | < 5        | < 5          | < 5        | 13 (0.12)    | < 5        |
|                 |             | ATE     | < 5          | < 5        | 64 (4.34)    | 9 (4.05)   | < 5          | < 5        | 42 (0.40)    | 16 (0.18)  |
|                 |             | IS      | < 5          | < 5        | 29 (1.97)    | 5 (2.25)   | < 5          | < 5        | 20 (0.19)    | 11 (0.12)  |
|                 |             | TIA     | < 5          | < 5        | 19 (1.29)    | < 5        | < 5          | < 5        | 10 (0.09)    | < 5        |
|                 |             | MI      | < 5          | < 5        | 21 (1.42)    | < 5        | < 5          | < 5        | 13 (0.12)    | 5 (0.06)   |
|                 |             | HF      | < 5          | < 5        | 243 (16.47)  | 12 (5.39)  | < 5          | < 5        | 47 (0.44)    | 11 (0.12)  |
|                 |             | HS      | < 5          | < 5        | 8 (0.54)     | < 5        | < 5          | < 5        | < 5          | < 5        |
|                 | MP          | < 5     | < 5          | < 5        | < 5          | < 5        | < 5          | 7 (0.07)   | < 5          |            |

VTE = Venous thromboembolism (DVT + PE), DVT = Deep vein thrombosis, PE = Pulmonary embolism, ATE = Arterial thrombosis/thromboembolism (IS + TIA + MI), IS = Ischemic stroke, TIA = Transient ischemic attack, MI = Myocardial infarction, HF = Heart failure, HS = Hemorrhagic stroke, MP = Myocarditis or Pericarditis

**Table S28: Number of records (and risk per 10,000 individuals) for post COVID-19 cardiac and thromboembolic complications, across cohorts and databases, stratified by exposure status (ChAdOx1 vaccine).**

| Cohort   | Time window    | Outcome | AURUM              |                    | GOLD               |                   | SIDIAP       |            |
|----------|----------------|---------|--------------------|--------------------|--------------------|-------------------|--------------|------------|
|          |                |         | Unvaccinated       | Vaccinated         | Unvaccinated       | Vaccinated        | Unvaccinated | Vaccinated |
| Cohort 1 |                |         | <b>N = 344,687</b> | <b>N = 219,804</b> | <b>N = 168,972</b> | <b>N = 82,406</b> |              |            |
|          | 0 to 30 days   | VTE     | 77 (2.23)          | 41 (1.87)          | 7 (0.41)           | < 5               |              |            |
|          |                | DVT     | 16 (0.46)          | 12 (0.55)          | < 5                | < 5               |              |            |
|          |                | PE      | 64 (1.86)          | 31 (1.41)          | 6 (0.36)           | < 5               |              |            |
|          |                | ATE     | 18 (0.52)          | 25 (1.14)          | 7 (0.41)           | 6 (0.73)          |              |            |
|          |                | IS      | 6 (0.17)           | < 5                | < 5                | < 5               |              |            |
|          |                | TIA     | < 5                | 7 (0.32)           | < 5                | < 5               |              |            |
|          |                | MI      | 9 (0.26)           | 17 (0.77)          | 5 (0.30)           | < 5               |              |            |
|          |                | HF      | 42 (1.22)          | 72 (3.28)          | 9 (0.53)           | 5 (0.61)          |              |            |
|          |                | HS      | < 5                | < 5                | < 5                | < 5               |              |            |
|          |                | MP      | < 5                | < 5                | < 5                | < 5               |              |            |
|          | 31 to 90 days  | VTE     | 12 (0.35)          | 14 (0.64)          | < 5                | < 5               |              |            |
|          |                | DVT     | 5 (0.15)           | 8 (0.36)           | < 5                | < 5               |              |            |
|          |                | PE      | 7 (0.20)           | 7 (0.32)           | < 5                | < 5               |              |            |
|          |                | ATE     | 6 (0.17)           | 20 (0.91)          | < 5                | < 5               |              |            |
|          |                | IS      | < 5                | < 5                | < 5                | < 5               |              |            |
|          |                | TIA     | < 5                | 9 (0.41)           | < 5                | < 5               |              |            |
|          |                | MI      | 5 (0.15)           | 9 (0.41)           | < 5                | < 5               |              |            |
|          |                | HF      | 26 (0.75)          | 42 (1.91)          | < 5                | 5 (0.61)          |              |            |
|          |                | HS      | < 5                | < 5                | < 5                | < 5               |              |            |
|          |                | MP      | < 5                | < 5                | < 5                | < 5               |              |            |
|          | 91 to 180 days | VTE     | 6 (0.17)           | 15 (0.68)          | < 5                | < 5               |              |            |
|          |                | DVT     | < 5                | 5 (0.23)           | < 5                | < 5               |              |            |
|          |                | PE      | < 5                | 10 (0.45)          | < 5                | < 5               |              |            |
|          |                | ATE     | 10 (0.29)          | 10 (0.45)          | < 5                | 6 (0.73)          |              |            |
|          |                | IS      | < 5                | < 5                | < 5                | < 5               |              |            |
|          |                | TIA     | 5 (0.15)           | 6 (0.27)           | < 5                | < 5               |              |            |
|          |                | MI      | < 5                | < 5                | < 5                | 5 (0.61)          |              |            |
|          |                | HF      | 31 (0.90)          | 38 (1.73)          | < 5                | < 5               |              |            |
|          |                | HS      | < 5                | < 5                | < 5                | < 5               |              |            |
|          |                | MP      | < 5                | < 5                | < 5                | < 5               |              |            |

| Cohort          | Time window     | Outcome | AURUM                |                    | GOLD               |                    | SIDIAP             |                    |
|-----------------|-----------------|---------|----------------------|--------------------|--------------------|--------------------|--------------------|--------------------|
|                 |                 |         | Unvaccinated         | Vaccinated         | Unvaccinated       | Vaccinated         | Unvaccinated       | Vaccinated         |
|                 | 181 to 365 days | VTE     | 5 (0.15)             | < 5                | < 5                | < 5                |                    |                    |
|                 |                 | DVT     | < 5                  | < 5                | < 5                | < 5                |                    |                    |
|                 |                 | PE      | < 5                  | < 5                | < 5                | < 5                |                    |                    |
|                 |                 | ATE     | 9 (0.26)             | 9 (0.41)           | < 5                | < 5                |                    |                    |
|                 |                 | IS      | < 5                  | < 5                | < 5                | < 5                |                    |                    |
|                 |                 | TIA     | < 5                  | < 5                | < 5                | < 5                |                    |                    |
|                 |                 | MI      | < 5                  | < 5                | < 5                | < 5                |                    |                    |
|                 |                 | HF      | 35 (1.02)            | 20 (0.91)          | < 5                | 5 (0.61)           |                    |                    |
|                 |                 | HS      | < 5                  | < 5                | < 5                | < 5                |                    |                    |
|                 |                 | MP      | < 5                  | < 5                | < 5                | < 5                |                    |                    |
| <b>Cohort 2</b> |                 |         | <b>N = 1,975,770</b> | <b>N = 969,262</b> | <b>N = 582,791</b> | <b>N = 302,999</b> | <b>N = 433,636</b> | <b>N = 323,204</b> |
|                 | 0 to 30 days    | VTE     | 243 (1.23)           | 158 (1.63)         | 33 (0.57)          | 19 (0.63)          | 262 (6.04)         | 90 (2.78)          |
|                 |                 | DVT     | 42 (0.21)            | 47 (0.48)          | 8 (0.14)           | < 5                | 65 (1.50)          | 45 (1.39)          |
|                 |                 | PE      | 206 (1.04)           | 120 (1.24)         | 26 (0.45)          | 15 (0.50)          | 218 (5.03)         | 55 (1.70)          |
|                 |                 | ATE     | 38 (0.19)            | 75 (0.77)          | < 5                | < 5                | 177 (4.08)         | 131 (4.05)         |
|                 |                 | IS      | 6 (0.03)             | 12 (0.12)          | < 5                | < 5                | 97 (2.24)          | 52 (1.61)          |
|                 |                 | TIA     | 7 (0.04)             | 13 (0.13)          | < 5                | < 5                | 17 (0.39)          | 23 (0.71)          |
|                 |                 | MI      | 25 (0.13)            | 52 (0.54)          | < 5                | < 5                | 67 (1.55)          | 62 (1.92)          |
|                 |                 | HF      | 46 (0.23)            | 103 (1.06)         | 5 (0.09)           | 11 (0.36)          | 379 (8.74)         | 123 (3.81)         |
|                 |                 | HS      | 5 (0.03)             | < 5                | < 5                | < 5                | 21 (0.48)          | 7 (0.22)           |
|                 |                 | MP      | 11 (0.06)            | 6 (0.06)           | < 5                | < 5                | 15 (0.35)          | 10 (0.31)          |
|                 | 31 to 90 days   | VTE     | 49 (0.25)            | 55 (0.57)          | < 5                | 9 (0.30)           | 60 (1.38)          | 36 (1.11)          |
|                 |                 | DVT     | 25 (0.13)            | 25 (0.26)          | < 5                | 5 (0.17)           | 32 (0.74)          | 25 (0.77)          |
|                 |                 | PE      | 27 (0.14)            | 32 (0.33)          | < 5                | < 5                | 34 (0.78)          | 18 (0.56)          |
|                 |                 | ATE     | 16 (0.08)            | 57 (0.59)          | < 5                | 5 (0.17)           | 86 (1.98)          | 107 (3.31)         |
|                 |                 | IS      | < 5                  | 6 (0.06)           | < 5                | < 5                | 42 (0.97)          | 58 (1.79)          |
|                 |                 | TIA     | < 5                  | 25 (0.26)          | < 5                | < 5                | 23 (0.53)          | 24 (0.74)          |
|                 |                 | MI      | 11 (0.06)            | 28 (0.29)          | < 5                | < 5                | 28 (0.65)          | 27 (0.84)          |
|                 |                 | HF      | 24 (0.12)            | 68 (0.70)          | < 5                | 7 (0.23)           | 140 (3.23)         | 62 (1.92)          |
|                 |                 | HS      | < 5                  | < 5                | < 5                | < 5                | 7 (0.16)           | 7 (0.22)           |
|                 |                 | MP      | 6 (0.03)             | < 5                | < 5                | < 5                | < 5                | < 5                |
|                 | 91 to 180 days  | VTE     | 25 (0.13)            | 30 (0.31)          | < 5                | < 5                | 58 (1.34)          | 23 (0.71)          |
|                 |                 | DVT     | 11 (0.06)            | 16 (0.17)          | < 5                | < 5                | 31 (0.71)          | 16 (0.50)          |
|                 |                 | PE      | 14 (0.07)            | 16 (0.17)          | < 5                | < 5                | 29 (0.67)          | 8 (0.25)           |



| Cohort          | Time window     | Outcome | AURUM                |                      | GOLD               |                    | SIDIAP             |                   |
|-----------------|-----------------|---------|----------------------|----------------------|--------------------|--------------------|--------------------|-------------------|
|                 |                 |         | Unvaccinated         | Vaccinated           | Unvaccinated       | Vaccinated         | Unvaccinated       | Vaccinated        |
|                 |                 | ATE     | 12 (0.06)            | 28 (0.29)            | < 5                | < 5                | 94 (2.17)          | 106 (3.28)        |
|                 |                 | IS      | < 5                  | < 5                  | < 5                | < 5                | 51 (1.18)          | 40 (1.24)         |
|                 |                 | TIA     | 7 (0.04)             | 13 (0.13)            | < 5                | < 5                | 21 (0.48)          | 32 (0.99)         |
|                 |                 | MI      | 6 (0.03)             | 15 (0.15)            | < 5                | < 5                | 25 (0.58)          | 37 (1.14)         |
|                 |                 | HF      | 16 (0.08)            | 44 (0.45)            | < 5                | < 5                | 115 (2.65)         | 60 (1.86)         |
|                 |                 | HS      | < 5                  | < 5                  | < 5                | < 5                | 8 (0.18)           | < 5               |
|                 |                 | MP      | < 5                  | < 5                  | < 5                | < 5                | 8 (0.18)           | < 5               |
|                 | 181 to 365 days | VTE     | 14 (0.07)            | 5 (0.05)             | < 5                | < 5                | 18 (0.42)          | 16 (0.50)         |
|                 |                 | DVT     | < 5                  | < 5                  | < 5                | < 5                | 10 (0.23)          | 13 (0.40)         |
|                 |                 | PE      | 10 (0.05)            | < 5                  | < 5                | < 5                | 9 (0.21)           | < 5               |
|                 |                 | ATE     | 11 (0.06)            | 11 (0.11)            | < 5                | < 5                | 71 (1.64)          | 46 (1.42)         |
|                 |                 | IS      | < 5                  | < 5                  | < 5                | < 5                | 38 (0.88)          | 21 (0.65)         |
|                 |                 | TIA     | < 5                  | < 5                  | < 5                | < 5                | 20 (0.46)          | 13 (0.40)         |
|                 |                 | MI      | 8 (0.04)             | 7 (0.07)             | < 5                | < 5                | 15 (0.35)          | 16 (0.50)         |
|                 |                 | HF      | 18 (0.09)            | 23 (0.24)            | < 5                | < 5                | 81 (1.87)          | 26 (0.80)         |
|                 |                 | HS      | < 5                  | < 5                  | < 5                | < 5                | 5 (0.12)           | < 5               |
|                 |                 | MP      | < 5                  | < 5                  | < 5                | < 5                | < 5                | < 5               |
| <b>Cohort 3</b> |                 |         | <b>N = 1,510,493</b> | <b>N = 1,473,602</b> | <b>N = 418,184</b> | <b>N = 423,876</b> | <b>N = 873,400</b> | <b>N = 84,204</b> |
|                 | 0 to 30 days    | VTE     | 244 (1.62)           | 139 (0.94)           | 28 (0.67)          | 16 (0.38)          | 332 (3.80)         | 27 (3.21)         |
|                 |                 | DVT     | 44 (0.29)            | 41 (0.28)            | 6 (0.14)           | < 5                | 95 (1.09)          | 9 (1.07)          |
|                 |                 | PE      | 209 (1.38)           | 101 (0.69)           | 23 (0.55)          | 12 (0.28)          | 266 (3.05)         | 22 (2.61)         |
|                 |                 | ATE     | 28 (0.19)            | 47 (0.32)            | < 5                | 12 (0.28)          | 216 (2.47)         | 32 (3.80)         |
|                 |                 | IS      | < 5                  | 5 (0.03)             | < 5                | < 5                | 103 (1.18)         | 13 (1.54)         |
|                 |                 | TIA     | 5 (0.03)             | 16 (0.11)            | < 5                | < 5                | 22 (0.25)          | 5 (0.59)          |
|                 |                 | MI      | 19 (0.13)            | 26 (0.18)            | < 5                | 9 (0.21)           | 97 (1.11)          | 16 (1.90)         |
|                 |                 | HF      | 30 (0.20)            | 28 (0.19)            | < 5                | < 5                | 372 (4.26)         | 51 (6.06)         |
|                 |                 | HS      | < 5                  | < 5                  | < 5                | < 5                | 20 (0.23)          | < 5               |
|                 |                 | MP      | 9 (0.06)             | 6 (0.04)             | < 5                | < 5                | 20 (0.23)          | 6 (0.71)          |
|                 | 31 to 90 days   | VTE     | 46 (0.30)            | 44 (0.30)            | < 5                | 7 (0.17)           | 85 (0.97)          | 9 (1.07)          |
|                 |                 | DVT     | 21 (0.14)            | 26 (0.18)            | < 5                | < 5                | 57 (0.65)          | < 5               |
|                 |                 | PE      | 28 (0.19)            | 18 (0.12)            | < 5                | < 5                | 38 (0.44)          | 6 (0.71)          |
|                 |                 | ATE     | 11 (0.07)            | 31 (0.21)            | < 5                | 7 (0.17)           | 109 (1.25)         | 25 (2.97)         |
|                 |                 | IS      | < 5                  | < 5                  | < 5                | < 5                | 52 (0.60)          | 11 (1.31)         |
|                 |                 | TIA     | < 5                  | 13 (0.09)            | < 5                | < 5                | 27 (0.31)          | < 5               |

| Cohort       | Time window     | Outcome         | AURUM                |                    | GOLD               |                    | SIDIAP       |            |
|--------------|-----------------|-----------------|----------------------|--------------------|--------------------|--------------------|--------------|------------|
|              |                 |                 | Unvaccinated         | Vaccinated         | Unvaccinated       | Vaccinated         | Unvaccinated | Vaccinated |
|              |                 | MI              | 9 (0.06)             | 16 (0.11)          | < 5                | < 5                | 38 (0.44)    | 10 (1.19)  |
|              |                 | HF              | 14 (0.09)            | 23 (0.16)          | < 5                | < 5                | 142 (1.63)   | 25 (2.97)  |
|              |                 | HS              | < 5                  | < 5                | < 5                | < 5                | 7 (0.08)     | < 5        |
|              |                 | MP              | 8 (0.05)             | 7 (0.05)           | < 5                | < 5                | 9 (0.10)     | < 5        |
|              | 91 to 180 days  | VTE             | 24 (0.16)            | 26 (0.18)          | < 5                | < 5                | 65 (0.74)    | 14 (1.66)  |
|              |                 | DVT             | 11 (0.07)            | 15 (0.10)          | < 5                | < 5                | 36 (0.41)    | 7 (0.83)   |
|              |                 | PE              | 14 (0.09)            | 14 (0.10)          | < 5                | < 5                | 33 (0.38)    | 8 (0.95)   |
|              |                 | ATE             | < 5                  | 26 (0.18)          | < 5                | < 5                | 115 (1.32)   | 30 (3.56)  |
|              |                 | IS              | < 5                  | < 5                | < 5                | < 5                | 58 (0.66)    | 14 (1.66)  |
|              |                 | TIA             | < 5                  | 8 (0.05)           | < 5                | < 5                | 22 (0.25)    | 10 (1.19)  |
|              |                 | MI              | < 5                  | 17 (0.12)          | < 5                | < 5                | 38 (0.44)    | 8 (0.95)   |
|              |                 | HF              | 10 (0.07)            | 12 (0.08)          | < 5                | < 5                | 122 (1.40)   | 12 (1.43)  |
|              |                 | HS              | < 5                  | < 5                | < 5                | < 5                | 9 (0.10)     | < 5        |
|              |                 | MP              | < 5                  | < 5                | < 5                | < 5                | 8 (0.09)     | < 5        |
|              |                 | 181 to 365 days | VTE                  | < 5                | 11 (0.07)          | < 5                | < 5          | 35 (0.40)  |
|              | DVT             |                 | < 5                  | 5 (0.03)           | < 5                | < 5                | 21 (0.24)    | < 5        |
|              | PE              |                 | < 5                  | 7 (0.05)           | < 5                | < 5                | 16 (0.18)    | 5 (0.59)   |
|              | ATE             |                 | < 5                  | < 5                | < 5                | < 5                | 57 (0.65)    | 15 (1.78)  |
|              | IS              |                 | < 5                  | < 5                | < 5                | < 5                | 26 (0.30)    | 6 (0.71)   |
|              | TIA             |                 | < 5                  | < 5                | < 5                | < 5                | 12 (0.14)    | < 5        |
|              | MI              |                 | < 5                  | < 5                | < 5                | < 5                | 20 (0.23)    | 8 (0.95)   |
|              | HF              |                 | < 5                  | < 5                | < 5                | < 5                | 64 (0.73)    | 6 (0.71)   |
|              | HS              |                 | < 5                  | < 5                | < 5                | < 5                | < 5          | < 5        |
|              | MP              |                 | < 5                  | < 5                | < 5                | < 5                | < 5          | < 5        |
|              | <b>Cohort 4</b> |                 | <b>N = 2,066,318</b> | <b>N = 542,670</b> | <b>N = 485,154</b> | <b>N = 147,744</b> |              |            |
| 0 to 30 days | VTE             | 346 (1.67)      | 27 (0.50)            | 38 (0.78)          | 8 (0.54)           |                    |              |            |
|              | DVT             | 56 (0.27)       | 7 (0.13)             | 6 (0.12)           | < 5                |                    |              |            |
|              | PE              | 302 (1.46)      | 21 (0.39)            | 33 (0.68)          | 6 (0.41)           |                    |              |            |
|              | ATE             | 26 (0.13)       | 5 (0.09)             | < 5                | < 5                |                    |              |            |
|              | IS              | < 5             | < 5                  | < 5                | < 5                |                    |              |            |
|              | TIA             | 5 (0.02)        | < 5                  | < 5                | < 5                |                    |              |            |
|              | MI              | 17 (0.08)       | < 5                  | < 5                | < 5                |                    |              |            |
|              | HF              | 28 (0.14)       | < 5                  | < 5                | < 5                |                    |              |            |
|              | HS              | < 5             | < 5                  | < 5                | < 5                |                    |              |            |

| Cohort | Time window     | Outcome        | AURUM        |            | GOLD         |            | SIDIAP       |            |
|--------|-----------------|----------------|--------------|------------|--------------|------------|--------------|------------|
|        |                 |                | Unvaccinated | Vaccinated | Unvaccinated | Vaccinated | Unvaccinated | Vaccinated |
|        |                 | MP             | 14 (0.07)    | < 5        | < 5          | < 5        |              |            |
|        | 31 to 90 days   | VTE            | 60 (0.29)    | 14 (0.26)  | < 5          | < 5        |              |            |
|        |                 | DVT            | 23 (0.11)    | 8 (0.15)   | < 5          | < 5        |              |            |
|        |                 | PE             | 40 (0.19)    | 6 (0.11)   | < 5          | < 5        |              |            |
|        |                 | ATE            | 13 (0.06)    | < 5        | < 5          | < 5        |              |            |
|        |                 | IS             | < 5          | < 5        | < 5          | < 5        |              |            |
|        |                 | TIA            | < 5          | < 5        | < 5          | < 5        |              |            |
|        |                 | MI             | 9 (0.04)     | < 5        | < 5          | < 5        |              |            |
|        |                 | HF             | 14 (0.07)    | < 5        | < 5          | < 5        |              |            |
|        |                 | HS             | < 5          | < 5        | < 5          | < 5        |              |            |
|        |                 | MP             | 7 (0.03)     | < 5        | < 5          | < 5        |              |            |
|        |                 | 91 to 180 days | VTE          | 29 (0.14)  | < 5          | < 5        | < 5          |            |
|        | DVT             |                | 10 (0.05)    | < 5        | < 5          | < 5        |              |            |
|        | PE              |                | 20 (0.10)    | < 5        | < 5          | < 5        |              |            |
|        | ATE             |                | < 5          | < 5        | < 5          | < 5        |              |            |
|        | IS              |                | < 5          | < 5        | < 5          | < 5        |              |            |
|        | TIA             |                | < 5          | < 5        | < 5          | < 5        |              |            |
|        | MI              |                | < 5          | < 5        | < 5          | < 5        |              |            |
|        | HF              |                | 10 (0.05)    | < 5        | < 5          | < 5        |              |            |
|        | HS              |                | < 5          | < 5        | < 5          | < 5        |              |            |
|        | MP              |                | < 5          | < 5        | < 5          | < 5        |              |            |
|        | 181 to 365 days |                | VTE          | < 5        | < 5          | < 5        | < 5          |            |
|        |                 | DVT            | < 5          | < 5        | < 5          | < 5        |              |            |
|        |                 | PE             | < 5          | < 5        | < 5          | < 5        |              |            |
|        |                 | ATE            | < 5          | < 5        | < 5          | < 5        |              |            |
|        |                 | IS             | < 5          | < 5        | < 5          | < 5        |              |            |
|        |                 | TIA            | < 5          | < 5        | < 5          | < 5        |              |            |
|        |                 | MI             | < 5          | < 5        | < 5          | < 5        |              |            |
|        |                 | HF             | < 5          | < 5        | < 5          | < 5        |              |            |
|        |                 | HS             | < 5          | < 5        | < 5          | < 5        |              |            |
|        |                 | MP             | < 5          | < 5        | < 5          | < 5        |              |            |

VTE = Venous thromboembolism (DVT + PE), DVT = Deep vein thrombosis, PE = Pulmonary embolism, ATE = Arterial thrombosis/thromboembolism (IS + TIA + MI), IS = Ischemic stroke, TIA = Transient ischemic attack, MI = Myocardial infarction, HF = Heart failure, HS = Hemorrhagic stroke, MP = Myocarditis or Pericarditis

**Table S29: Number of records (and risk per 10,000 individuals) for post COVID-19 cardiac and thromboembolic complications, across cohorts and databases, stratified by exposure status (ChAdOx1 vaccine). Follow-up ends at first vaccine dose after index date.**

| Cohort   | Time window    | Outcome       | AURUM              |                    | GOLD               |                   | SIDIAP       |            |
|----------|----------------|---------------|--------------------|--------------------|--------------------|-------------------|--------------|------------|
|          |                |               | Unvaccinated       | Vaccinated         | Unvaccinated       | Vaccinated        | Unvaccinated | Vaccinated |
| Cohort 1 |                |               | <b>N = 344,687</b> | <b>N = 219,804</b> | <b>N = 168,972</b> | <b>N = 82,406</b> |              |            |
|          | 0 to 30 days   | VTE           | 77 (2.23)          | 14 (0.64)          | 7 (0.41)           | < 5               |              |            |
|          |                | DVT           | 16 (0.46)          | < 5                | < 5                | < 5               |              |            |
|          |                | PE            | 64 (1.86)          | 13 (0.59)          | 6 (0.36)           | < 5               |              |            |
|          |                | ATE           | 18 (0.52)          | 10 (0.45)          | 7 (0.41)           | < 5               |              |            |
|          |                | IS            | 6 (0.17)           | < 5                | < 5                | < 5               |              |            |
|          |                | TIA           | < 5                | < 5                | < 5                | < 5               |              |            |
|          |                | MI            | 9 (0.26)           | 6 (0.27)           | 5 (0.30)           | < 5               |              |            |
|          |                | HF            | 42 (1.22)          | 28 (1.27)          | 9 (0.53)           | < 5               |              |            |
|          |                | HS            | < 5                | < 5                | < 5                | < 5               |              |            |
|          |                | MP            | < 5                | < 5                | < 5                | < 5               |              |            |
|          |                | 31 to 90 days | VTE                | 12 (0.35)          | 5 (0.23)           | < 5               | < 5          |            |
|          | DVT            |               | 5 (0.15)           | < 5                | < 5                | < 5               |              |            |
|          | PE             |               | 7 (0.20)           | < 5                | < 5                | < 5               |              |            |
|          | ATE            |               | 6 (0.17)           | 8 (0.36)           | < 5                | < 5               |              |            |
|          | IS             |               | < 5                | < 5                | < 5                | < 5               |              |            |
|          | TIA            |               | < 5                | < 5                | < 5                | < 5               |              |            |
|          | MI             |               | 5 (0.15)           | < 5                | < 5                | < 5               |              |            |
|          | HF             |               | 26 (0.75)          | 20 (0.91)          | < 5                | < 5               |              |            |
|          | HS             |               | < 5                | < 5                | < 5                | < 5               |              |            |
|          | MP             |               | < 5                | < 5                | < 5                | < 5               |              |            |
|          | 91 to 180 days |               | VTE                | 6 (0.17)           | 5 (0.23)           | < 5               | < 5          |            |
|          |                | DVT           | < 5                | < 5                | < 5                | < 5               |              |            |
|          |                | PE            | < 5                | < 5                | < 5                | < 5               |              |            |
|          |                | ATE           | 10 (0.29)          | < 5                | < 5                | < 5               |              |            |
|          |                | IS            | < 5                | < 5                | < 5                | < 5               |              |            |
|          |                | TIA           | 5 (0.15)           | < 5                | < 5                | < 5               |              |            |
|          |                | MI            | < 5                | < 5                | < 5                | < 5               |              |            |
|          |                | HF            | 31 (0.90)          | 19 (0.86)          | < 5                | < 5               |              |            |
|          |                | HS            | < 5                | < 5                | < 5                | < 5               |              |            |
|          |                | MP            | < 5                | < 5                | < 5                | < 5               |              |            |

| Cohort          | Time window     | Outcome | AURUM                |                    | GOLD               |                    | SIDIAP             |                    |
|-----------------|-----------------|---------|----------------------|--------------------|--------------------|--------------------|--------------------|--------------------|
|                 |                 |         | Unvaccinated         | Vaccinated         | Unvaccinated       | Vaccinated         | Unvaccinated       | Vaccinated         |
|                 | 181 to 365 days | VTE     | 5 (0.15)             | < 5                | < 5                | < 5                |                    |                    |
|                 |                 | DVT     | < 5                  | < 5                | < 5                | < 5                |                    |                    |
|                 |                 | PE      | < 5                  | < 5                | < 5                | < 5                |                    |                    |
|                 |                 | ATE     | 9 (0.26)             | 8 (0.36)           | < 5                | < 5                |                    |                    |
|                 |                 | IS      | < 5                  | < 5                | < 5                | < 5                |                    |                    |
|                 |                 | TIA     | < 5                  | < 5                | < 5                | < 5                |                    |                    |
|                 |                 | MI      | < 5                  | < 5                | < 5                | < 5                |                    |                    |
|                 |                 | HF      | 35 (1.02)            | 18 (0.82)          | < 5                | 5 (0.61)           |                    |                    |
|                 |                 | HS      | < 5                  | < 5                | < 5                | < 5                |                    |                    |
|                 |                 | MP      | < 5                  | < 5                | < 5                | < 5                |                    |                    |
| <b>Cohort 2</b> |                 |         | <b>N = 1,975,770</b> | <b>N = 969,262</b> | <b>N = 582,791</b> | <b>N = 302,999</b> | <b>N = 433,636</b> | <b>N = 323,204</b> |
|                 | 0 to 30 days    | VTE     | 243 (1.23)           | 40 (0.41)          | 33 (0.57)          | < 5                | 262 (6.04)         | 9 (0.28)           |
|                 |                 | DVT     | 42 (0.21)            | 13 (0.13)          | 8 (0.14)           | < 5                | 65 (1.50)          | 5 (0.15)           |
|                 |                 | PE      | 206 (1.04)           | 30 (0.31)          | 26 (0.45)          | < 5                | 218 (5.03)         | 6 (0.19)           |
|                 |                 | ATE     | 38 (0.19)            | 11 (0.11)          | < 5                | < 5                | 177 (4.08)         | 6 (0.19)           |
|                 |                 | IS      | 6 (0.03)             | < 5                | < 5                | < 5                | 97 (2.24)          | < 5                |
|                 |                 | TIA     | 7 (0.04)             | < 5                | < 5                | < 5                | 17 (0.39)          | < 5                |
|                 |                 | MI      | 25 (0.13)            | 9 (0.09)           | < 5                | < 5                | 67 (1.55)          | < 5                |
|                 |                 | HF      | 46 (0.23)            | 32 (0.33)          | 5 (0.09)           | < 5                | 379 (8.74)         | 12 (0.37)          |
|                 |                 | HS      | 5 (0.03)             | < 5                | < 5                | < 5                | 21 (0.48)          | < 5                |
|                 |                 | MP      | 11 (0.06)            | < 5                | < 5                | < 5                | 15 (0.35)          | < 5                |
|                 | 31 to 90 days   | VTE     | 49 (0.25)            | 8 (0.08)           | < 5                | < 5                | 60 (1.38)          | < 5                |
|                 |                 | DVT     | 25 (0.13)            | 5 (0.05)           | < 5                | < 5                | 32 (0.74)          | < 5                |
|                 |                 | PE      | 27 (0.14)            | < 5                | < 5                | < 5                | 34 (0.78)          | < 5                |
|                 |                 | ATE     | 16 (0.08)            | 9 (0.09)           | < 5                | < 5                | 86 (1.98)          | 6 (0.19)           |
|                 |                 | IS      | < 5                  | < 5                | < 5                | < 5                | 42 (0.97)          | < 5                |
|                 |                 | TIA     | < 5                  | < 5                | < 5                | < 5                | 23 (0.53)          | < 5                |
|                 |                 | MI      | 11 (0.06)            | 6 (0.06)           | < 5                | < 5                | 28 (0.65)          | < 5                |
|                 |                 | HF      | 24 (0.12)            | 13 (0.13)          | < 5                | < 5                | 140 (3.23)         | 7 (0.22)           |
|                 |                 | HS      | < 5                  | < 5                | < 5                | < 5                | 7 (0.16)           | < 5                |
|                 |                 | MP      | 6 (0.03)             | < 5                | < 5                | < 5                | < 5                | < 5                |
|                 | 91 to 180 days  | VTE     | 25 (0.13)            | 12 (0.12)          | < 5                | < 5                | 58 (1.34)          | < 5                |
|                 |                 | DVT     | 11 (0.06)            | 7 (0.07)           | < 5                | < 5                | 31 (0.71)          | < 5                |
|                 |                 | PE      | 14 (0.07)            | 5 (0.05)           | < 5                | < 5                | 29 (0.67)          | < 5                |

| Cohort          | Time window     | Outcome | AURUM                |                      | GOLD               |                    | SIDIAP             |                   |
|-----------------|-----------------|---------|----------------------|----------------------|--------------------|--------------------|--------------------|-------------------|
|                 |                 |         | Unvaccinated         | Vaccinated           | Unvaccinated       | Vaccinated         | Unvaccinated       | Vaccinated        |
|                 |                 | ATE     | 12 (0.06)            | 10 (0.10)            | < 5                | < 5                | 94 (2.17)          | 6 (0.19)          |
|                 |                 | IS      | < 5                  | < 5                  | < 5                | < 5                | 51 (1.18)          | < 5               |
|                 |                 | TIA     | 7 (0.04)             | < 5                  | < 5                | < 5                | 21 (0.48)          | < 5               |
|                 |                 | MI      | 6 (0.03)             | 6 (0.06)             | < 5                | < 5                | 25 (0.58)          | < 5               |
|                 |                 | HF      | 16 (0.08)            | 18 (0.19)            | < 5                | < 5                | 115 (2.65)         | < 5               |
|                 |                 | HS      | < 5                  | < 5                  | < 5                | < 5                | 8 (0.18)           | < 5               |
|                 |                 | MP      | < 5                  | < 5                  | < 5                | < 5                | 8 (0.18)           | < 5               |
|                 | 181 to 365 days | VTE     | 14 (0.07)            | 5 (0.05)             | < 5                | < 5                | 18 (0.42)          | 9 (0.28)          |
|                 |                 | DVT     | < 5                  | < 5                  | < 5                | < 5                | 10 (0.23)          | 7 (0.22)          |
|                 |                 | PE      | 10 (0.05)            | < 5                  | < 5                | < 5                | 9 (0.21)           | < 5               |
|                 |                 | ATE     | 11 (0.06)            | 10 (0.10)            | < 5                | < 5                | 71 (1.64)          | 10 (0.31)         |
|                 |                 | IS      | < 5                  | < 5                  | < 5                | < 5                | 38 (0.88)          | < 5               |
|                 |                 | TIA     | < 5                  | < 5                  | < 5                | < 5                | 20 (0.46)          | < 5               |
|                 |                 | MI      | 8 (0.04)             | 6 (0.06)             | < 5                | < 5                | 15 (0.35)          | 5 (0.15)          |
|                 |                 | HF      | 18 (0.09)            | 20 (0.21)            | < 5                | < 5                | 81 (1.87)          | 9 (0.28)          |
|                 |                 | HS      | < 5                  | < 5                  | < 5                | < 5                | 5 (0.12)           | < 5               |
|                 |                 | MP      | < 5                  | < 5                  | < 5                | < 5                | < 5                | < 5               |
| <b>Cohort 3</b> |                 |         | <b>N = 1,510,493</b> | <b>N = 1,473,602</b> | <b>N = 418,184</b> | <b>N = 423,876</b> | <b>N = 873,400</b> | <b>N = 84,204</b> |
|                 | 0 to 30 days    | VTE     | 244 (1.62)           | 23 (0.16)            | 28 (0.67)          | < 5                | 332 (3.80)         | 5 (0.59)          |
|                 |                 | DVT     | 44 (0.29)            | < 5                  | 6 (0.14)           | < 5                | 95 (1.09)          | < 5               |
|                 |                 | PE      | 209 (1.38)           | 19 (0.13)            | 23 (0.55)          | < 5                | 266 (3.05)         | < 5               |
|                 |                 | ATE     | 28 (0.19)            | 8 (0.05)             | < 5                | < 5                | 216 (2.47)         | < 5               |
|                 |                 | IS      | < 5                  | < 5                  | < 5                | < 5                | 103 (1.18)         | < 5               |
|                 |                 | TIA     | 5 (0.03)             | < 5                  | < 5                | < 5                | 22 (0.25)          | < 5               |
|                 |                 | MI      | 19 (0.13)            | 7 (0.05)             | < 5                | < 5                | 97 (1.11)          | < 5               |
|                 |                 | HF      | 30 (0.20)            | 11 (0.07)            | < 5                | < 5                | 372 (4.26)         | 5 (0.59)          |
|                 |                 | HS      | < 5                  | < 5                  | < 5                | < 5                | 20 (0.23)          | < 5               |
|                 |                 | MP      | 9 (0.06)             | < 5                  | < 5                | < 5                | 20 (0.23)          | < 5               |
|                 | 31 to 90 days   | VTE     | 46 (0.30)            | < 5                  | < 5                | < 5                | 85 (0.97)          | < 5               |
|                 |                 | DVT     | 21 (0.14)            | < 5                  | < 5                | < 5                | 57 (0.65)          | < 5               |
|                 |                 | PE      | 28 (0.19)            | < 5                  | < 5                | < 5                | 38 (0.44)          | < 5               |
|                 |                 | ATE     | 11 (0.07)            | 6 (0.04)             | < 5                | < 5                | 109 (1.25)         | < 5               |
|                 |                 | IS      | < 5                  | < 5                  | < 5                | < 5                | 52 (0.60)          | < 5               |
|                 |                 | TIA     | < 5                  | < 5                  | < 5                | 27 (0.31)          | < 5                |                   |

| Cohort          | Time window     | Outcome    | AURUM                |                    | GOLD               |                    | SIDIAP       |            |
|-----------------|-----------------|------------|----------------------|--------------------|--------------------|--------------------|--------------|------------|
|                 |                 |            | Unvaccinated         | Vaccinated         | Unvaccinated       | Vaccinated         | Unvaccinated | Vaccinated |
|                 | 91 to 180 days  | MI         | 9 (0.06)             | < 5                | < 5                | < 5                | 38 (0.44)    | < 5        |
|                 |                 | HF         | 14 (0.09)            | 5 (0.03)           | < 5                | < 5                | 142 (1.63)   | < 5        |
|                 |                 | HS         | < 5                  | < 5                | < 5                | < 5                | 7 (0.08)     | < 5        |
|                 |                 | MP         | 8 (0.05)             | < 5                | < 5                | < 5                | 9 (0.10)     | < 5        |
|                 |                 | VTE        | 24 (0.16)            | 8 (0.05)           | < 5                | < 5                | 65 (0.74)    | < 5        |
|                 |                 | DVT        | 11 (0.07)            | 6 (0.04)           | < 5                | < 5                | 36 (0.41)    | < 5        |
|                 |                 | PE         | 14 (0.09)            | < 5                | < 5                | < 5                | 33 (0.38)    | < 5        |
|                 |                 | ATE        | < 5                  | 7 (0.05)           | < 5                | < 5                | 115 (1.32)   | 6 (0.71)   |
|                 |                 | IS         | < 5                  | < 5                | < 5                | < 5                | 58 (0.66)    | 5 (0.59)   |
|                 |                 | TIA        | < 5                  | < 5                | < 5                | < 5                | 22 (0.25)    | < 5        |
|                 |                 | MI         | < 5                  | < 5                | < 5                | < 5                | 38 (0.44)    | < 5        |
|                 |                 | HF         | 10 (0.07)            | < 5                | < 5                | < 5                | 122 (1.40)   | < 5        |
|                 |                 | HS         | < 5                  | < 5                | < 5                | < 5                | 9 (0.10)     | < 5        |
|                 |                 | MP         | < 5                  | < 5                | < 5                | < 5                | 8 (0.09)     | < 5        |
|                 | 181 to 365 days | VTE        | < 5                  | 9 (0.06)           | < 5                | < 5                | 35 (0.40)    | < 5        |
|                 | DVT             | < 5        | < 5                  | < 5                | < 5                | 21 (0.24)          | < 5          |            |
|                 | PE              | < 5        | 6 (0.04)             | < 5                | < 5                | 16 (0.18)          | < 5          |            |
|                 | ATE             | < 5        | < 5                  | < 5                | < 5                | 57 (0.65)          | 8 (0.95)     |            |
|                 | IS              | < 5        | < 5                  | < 5                | < 5                | 26 (0.30)          | < 5          |            |
|                 | TIA             | < 5        | < 5                  | < 5                | < 5                | 12 (0.14)          | < 5          |            |
|                 | MI              | < 5        | < 5                  | < 5                | < 5                | 20 (0.23)          | < 5          |            |
|                 | HF              | < 5        | < 5                  | < 5                | < 5                | 64 (0.73)          | 5 (0.59)     |            |
|                 | HS              | < 5        | < 5                  | < 5                | < 5                | < 5                | < 5          |            |
|                 | MP              | < 5        | < 5                  | < 5                | < 5                | < 5                | < 5          |            |
| <b>Cohort 4</b> |                 |            | <b>N = 2,066,318</b> | <b>N = 542,670</b> | <b>N = 485,154</b> | <b>N = 147,744</b> |              |            |
| 0 to 30 days    | VTE             | 346 (1.67) | 8 (0.15)             | 38 (0.78)          | 6 (0.41)           |                    |              |            |
|                 | DVT             | 56 (0.27)  | < 5                  | 6 (0.12)           | < 5                |                    |              |            |
|                 | PE              | 302 (1.46) | 7 (0.13)             | 33 (0.68)          | 6 (0.41)           |                    |              |            |
|                 | ATE             | 26 (0.13)  | < 5                  | < 5                | < 5                |                    |              |            |
|                 | IS              | < 5        | < 5                  | < 5                | < 5                |                    |              |            |
|                 | TIA             | 5 (0.02)   | < 5                  | < 5                | < 5                |                    |              |            |
|                 | MI              | 17 (0.08)  | < 5                  | < 5                | < 5                |                    |              |            |
|                 | HF              | 28 (0.14)  | < 5                  | < 5                | < 5                |                    |              |            |
|                 | HS              | < 5        | < 5                  | < 5                | < 5                |                    |              |            |

| Cohort | Time window     | Outcome        | AURUM        |            | GOLD         |            | SIDIAP       |            |
|--------|-----------------|----------------|--------------|------------|--------------|------------|--------------|------------|
|        |                 |                | Unvaccinated | Vaccinated | Unvaccinated | Vaccinated | Unvaccinated | Vaccinated |
|        |                 | MP             | 14 (0.07)    | < 5        | < 5          | < 5        |              |            |
|        | 31 to 90 days   | VTE            | 60 (0.29)    | 8 (0.15)   | < 5          | < 5        |              |            |
|        |                 | DVT            | 23 (0.11)    | < 5        | < 5          | < 5        |              |            |
|        |                 | PE             | 40 (0.19)    | 5 (0.09)   | < 5          | < 5        |              |            |
|        |                 | ATE            | 13 (0.06)    | < 5        | < 5          | < 5        |              |            |
|        |                 | IS             | < 5          | < 5        | < 5          | < 5        |              |            |
|        |                 | TIA            | < 5          | < 5        | < 5          | < 5        |              |            |
|        |                 | MI             | 9 (0.04)     | < 5        | < 5          | < 5        |              |            |
|        |                 | HF             | 14 (0.07)    | < 5        | < 5          | < 5        |              |            |
|        |                 | HS             | < 5          | < 5        | < 5          | < 5        |              |            |
|        |                 | MP             | 7 (0.03)     | < 5        | < 5          | < 5        |              |            |
|        |                 | 91 to 180 days | VTE          | 29 (0.14)  | < 5          | < 5        | < 5          |            |
|        | DVT             |                | 10 (0.05)    | < 5        | < 5          | < 5        |              |            |
|        | PE              |                | 20 (0.10)    | < 5        | < 5          | < 5        |              |            |
|        | ATE             |                | < 5          | < 5        | < 5          | < 5        |              |            |
|        | IS              |                | < 5          | < 5        | < 5          | < 5        |              |            |
|        | TIA             |                | < 5          | < 5        | < 5          | < 5        |              |            |
|        | MI              |                | < 5          | < 5        | < 5          | < 5        |              |            |
|        | HF              |                | 10 (0.05)    | < 5        | < 5          | < 5        |              |            |
|        | HS              |                | < 5          | < 5        | < 5          | < 5        |              |            |
|        | MP              |                | < 5          | < 5        | < 5          | < 5        |              |            |
|        | 181 to 365 days |                | VTE          | < 5        | < 5          | < 5        | < 5          |            |
|        |                 | DVT            | < 5          | < 5        | < 5          | < 5        |              |            |
|        |                 | PE             | < 5          | < 5        | < 5          | < 5        |              |            |
|        |                 | ATE            | < 5          | < 5        | < 5          | < 5        |              |            |
|        |                 | IS             | < 5          | < 5        | < 5          | < 5        |              |            |
|        |                 | TIA            | < 5          | < 5        | < 5          | < 5        |              |            |
|        |                 | MI             | < 5          | < 5        | < 5          | < 5        |              |            |
|        |                 | HF             | < 5          | < 5        | < 5          | < 5        |              |            |
|        |                 | HS             | < 5          | < 5        | < 5          | < 5        |              |            |
|        | MP              | < 5            | < 5          | < 5        | < 5          |            |              |            |

VTE = Venous thromboembolism (DVT + PE), DVT = Deep vein thrombosis, PE = Pulmonary embolism, ATE = Arterial thrombosis/thromboembolism (IS + TIA + MI), IS = Ischemic stroke, TIA = Transient ischemic attack, MI = Myocardial infarction, HF = Heart failure, HS = Hemorrhagic stroke, MP = Myocarditis or Pericarditis



**Table S30: Number of records (and risk per 10,000 individuals) for post COVID-19 cardiac and thromboembolic complications, across cohorts and databases, stratified by exposure status (ChAdOx1 vaccine). Only first outcome after COVID-19 captured.**

| Cohort          | Time window           | Outcome              | AURUM              |                    | GOLD               |                   | SIDIAP       |            |
|-----------------|-----------------------|----------------------|--------------------|--------------------|--------------------|-------------------|--------------|------------|
|                 |                       |                      | Unvaccinated       | Vaccinated         | Unvaccinated       | Vaccinated        | Unvaccinated | Vaccinated |
| <b>Cohort 1</b> |                       |                      | <b>N = 344,687</b> | <b>N = 219,804</b> | <b>N = 168,972</b> | <b>N = 82,406</b> |              |            |
|                 | <b>0 to 30 days</b>   | <b>VTE</b>           | 77 (2.23)          | 41 (1.87)          | 7 (0.41)           | < 5               |              |            |
|                 |                       | <b>DVT</b>           | 16 (0.46)          | 12 (0.55)          | < 5                | < 5               |              |            |
|                 |                       | <b>PE</b>            | 64 (1.86)          | 31 (1.41)          | 6 (0.36)           | < 5               |              |            |
|                 |                       | <b>ATE</b>           | 18 (0.52)          | 25 (1.14)          | 7 (0.41)           | 6 (0.73)          |              |            |
|                 |                       | <b>IS</b>            | 6 (0.17)           | < 5                | < 5                | < 5               |              |            |
|                 |                       | <b>TIA</b>           | < 5                | 7 (0.32)           | < 5                | < 5               |              |            |
|                 |                       | <b>MI</b>            | 9 (0.26)           | 17 (0.77)          | 5 (0.30)           | < 5               |              |            |
|                 |                       | <b>HF</b>            | 42 (1.22)          | 72 (3.28)          | 9 (0.53)           | 5 (0.61)          |              |            |
|                 |                       | <b>HS</b>            | < 5                | < 5                | < 5                | < 5               |              |            |
|                 |                       | <b>MP</b>            | < 5                | < 5                | < 5                | < 5               |              |            |
|                 |                       | <b>31 to 90 days</b> | <b>VTE</b>         | 12 (0.35)          | 14 (0.64)          | < 5               | < 5          |            |
|                 | <b>DVT</b>            |                      | 5 (0.15)           | 8 (0.36)           | < 5                | < 5               |              |            |
|                 | <b>PE</b>             |                      | 7 (0.20)           | 7 (0.32)           | < 5                | < 5               |              |            |
|                 | <b>ATE</b>            |                      | 6 (0.17)           | 20 (0.91)          | < 5                | < 5               |              |            |
|                 | <b>IS</b>             |                      | < 5                | < 5                | < 5                | < 5               |              |            |
|                 | <b>TIA</b>            |                      | < 5                | 9 (0.41)           | < 5                | < 5               |              |            |
|                 | <b>MI</b>             |                      | 5 (0.15)           | 9 (0.41)           | < 5                | < 5               |              |            |
|                 | <b>HF</b>             |                      | 26 (0.75)          | 39 (1.77)          | < 5                | 5 (0.61)          |              |            |
|                 | <b>HS</b>             |                      | < 5                | < 5                | < 5                | < 5               |              |            |
|                 | <b>MP</b>             |                      | < 5                | < 5                | < 5                | < 5               |              |            |
|                 | <b>91 to 180 days</b> |                      | <b>VTE</b>         | 6 (0.17)           | 15 (0.68)          | < 5               | < 5          |            |
|                 |                       | <b>DVT</b>           | < 5                | 5 (0.23)           | < 5                | < 5               |              |            |
|                 |                       | <b>PE</b>            | < 5                | 10 (0.45)          | < 5                | < 5               |              |            |
|                 |                       | <b>ATE</b>           | 10 (0.29)          | 10 (0.45)          | < 5                | 6 (0.73)          |              |            |
|                 |                       | <b>IS</b>            | < 5                | < 5                | < 5                | < 5               |              |            |
|                 |                       | <b>TIA</b>           | 5 (0.15)           | 6 (0.27)           | < 5                | < 5               |              |            |
|                 |                       | <b>MI</b>            | < 5                | < 5                | < 5                | 5 (0.61)          |              |            |
|                 |                       | <b>HF</b>            | 28 (0.81)          | 35 (1.59)          | < 5                | < 5               |              |            |
|                 |                       | <b>HS</b>            | < 5                | < 5                | < 5                | < 5               |              |            |
|                 |                       | <b>MP</b>            | < 5                | < 5                | < 5                | < 5               |              |            |

| Cohort          | Time window     | Outcome | AURUM                |                    | GOLD               |                    | SIDIAP             |                    |
|-----------------|-----------------|---------|----------------------|--------------------|--------------------|--------------------|--------------------|--------------------|
|                 |                 |         | Unvaccinated         | Vaccinated         | Unvaccinated       | Vaccinated         | Unvaccinated       | Vaccinated         |
|                 | 181 to 365 days | VTE     | < 5                  | < 5                | < 5                | < 5                |                    |                    |
|                 |                 | DVT     | < 5                  | < 5                | < 5                | < 5                |                    |                    |
|                 |                 | PE      | < 5                  | < 5                | < 5                | < 5                |                    |                    |
|                 |                 | ATE     | 9 (0.26)             | 9 (0.41)           | < 5                | < 5                |                    |                    |
|                 |                 | IS      | < 5                  | < 5                | < 5                | < 5                |                    |                    |
|                 |                 | TIA     | < 5                  | < 5                | < 5                | < 5                |                    |                    |
|                 |                 | MI      | < 5                  | < 5                | < 5                | < 5                |                    |                    |
|                 |                 | HF      | 32 (0.93)            | 18 (0.82)          | < 5                | 5 (0.61)           |                    |                    |
|                 |                 | HS      | < 5                  | < 5                | < 5                | < 5                |                    |                    |
|                 |                 | MP      | < 5                  | < 5                | < 5                | < 5                |                    |                    |
| <b>Cohort 2</b> |                 |         | <b>N = 1,975,770</b> | <b>N = 969,262</b> | <b>N = 582,791</b> | <b>N = 302,999</b> | <b>N = 433,636</b> | <b>N = 323,204</b> |
|                 | 0 to 30 days    | VTE     | 243 (1.23)           | 158 (1.63)         | 33 (0.57)          | 19 (0.63)          | 262 (6.04)         | 90 (2.78)          |
|                 |                 | DVT     | 42 (0.21)            | 47 (0.48)          | 8 (0.14)           | < 5                | 65 (1.50)          | 45 (1.39)          |
|                 |                 | PE      | 206 (1.04)           | 120 (1.24)         | 26 (0.45)          | 15 (0.50)          | 218 (5.03)         | 55 (1.70)          |
|                 |                 | ATE     | 38 (0.19)            | 75 (0.77)          | < 5                | < 5                | 177 (4.08)         | 131 (4.05)         |
|                 |                 | IS      | 6 (0.03)             | 12 (0.12)          | < 5                | < 5                | 97 (2.24)          | 52 (1.61)          |
|                 |                 | TIA     | 7 (0.04)             | 13 (0.13)          | < 5                | < 5                | 17 (0.39)          | 23 (0.71)          |
|                 |                 | MI      | 25 (0.13)            | 52 (0.54)          | < 5                | < 5                | 67 (1.55)          | 62 (1.92)          |
|                 |                 | HF      | 46 (0.23)            | 103 (1.06)         | 5 (0.09)           | 11 (0.36)          | 379 (8.74)         | 123 (3.81)         |
|                 |                 | HS      | 5 (0.03)             | < 5                | < 5                | < 5                | 21 (0.48)          | 7 (0.22)           |
|                 |                 | MP      | 11 (0.06)            | 6 (0.06)           | < 5                | < 5                | 15 (0.35)          | 10 (0.31)          |
|                 | 31 to 90 days   | VTE     | 46 (0.23)            | 54 (0.56)          | < 5                | 9 (0.30)           | 57 (1.31)          | 34 (1.05)          |
|                 |                 | DVT     | 24 (0.12)            | 25 (0.26)          | < 5                | 5 (0.17)           | 30 (0.69)          | 23 (0.71)          |
|                 |                 | PE      | 25 (0.13)            | 31 (0.32)          | < 5                | < 5                | 32 (0.74)          | 16 (0.50)          |
|                 |                 | ATE     | 16 (0.08)            | 56 (0.58)          | < 5                | 5 (0.17)           | 84 (1.94)          | 106 (3.28)         |
|                 |                 | IS      | < 5                  | 6 (0.06)           | < 5                | < 5                | 42 (0.97)          | 57 (1.76)          |
|                 |                 | TIA     | < 5                  | 24 (0.25)          | < 5                | < 5                | 23 (0.53)          | 24 (0.74)          |
|                 |                 | MI      | 11 (0.06)            | 28 (0.29)          | < 5                | < 5                | 26 (0.60)          | 27 (0.84)          |
|                 |                 | HF      | 24 (0.12)            | 65 (0.67)          | < 5                | 7 (0.23)           | 134 (3.09)         | 61 (1.89)          |
|                 |                 | HS      | < 5                  | < 5                | < 5                | < 5                | 7 (0.16)           | 7 (0.22)           |
|                 |                 | MP      | 6 (0.03)             | < 5                | < 5                | < 5                | < 5                | < 5                |
|                 | 91 to 180 days  | VTE     | 22 (0.11)            | 28 (0.29)          | < 5                | < 5                | 52 (1.20)          | 21 (0.65)          |
|                 |                 | DVT     | 10 (0.05)            | 15 (0.15)          | < 5                | < 5                | 28 (0.65)          | 16 (0.50)          |
|                 |                 | PE      | 12 (0.06)            | 15 (0.15)          | < 5                | < 5                | 26 (0.60)          | 6 (0.19)           |

| Cohort          | Time window     | Outcome | AURUM                |                      | GOLD               |                    | SIDIAP             |                   |
|-----------------|-----------------|---------|----------------------|----------------------|--------------------|--------------------|--------------------|-------------------|
|                 |                 |         | Unvaccinated         | Vaccinated           | Unvaccinated       | Vaccinated         | Unvaccinated       | Vaccinated        |
|                 |                 | ATE     | 11 (0.06)            | 28 (0.29)            | < 5                | < 5                | 83 (1.91)          | 106 (3.28)        |
|                 |                 | IS      | < 5                  | < 5                  | < 5                | < 5                | 45 (1.04)          | 40 (1.24)         |
|                 |                 | TIA     | 7 (0.04)             | 13 (0.13)            | < 5                | < 5                | 20 (0.46)          | 32 (0.99)         |
|                 |                 | MI      | 5 (0.03)             | 15 (0.15)            | < 5                | < 5                | 21 (0.48)          | 37 (1.14)         |
|                 |                 | HF      | 16 (0.08)            | 41 (0.42)            | < 5                | < 5                | 105 (2.42)         | 54 (1.67)         |
|                 |                 | HS      | < 5                  | < 5                  | < 5                | < 5                | 7 (0.16)           | < 5               |
|                 |                 | MP      | < 5                  | < 5                  | < 5                | < 5                | 7 (0.16)           | < 5               |
|                 | 181 to 365 days | VTE     | 14 (0.07)            | < 5                  | < 5                | < 5                | 17 (0.39)          | 14 (0.43)         |
|                 |                 | DVT     | < 5                  | < 5                  | < 5                | < 5                | 9 (0.21)           | 12 (0.37)         |
|                 |                 | PE      | 10 (0.05)            | < 5                  | < 5                | < 5                | 9 (0.21)           | < 5               |
|                 |                 | ATE     | 10 (0.05)            | 10 (0.10)            | < 5                | < 5                | 61 (1.41)          | 40 (1.24)         |
|                 |                 | IS      | < 5                  | < 5                  | < 5                | < 5                | 33 (0.76)          | 19 (0.59)         |
|                 |                 | TIA     | < 5                  | < 5                  | < 5                | < 5                | 18 (0.42)          | 12 (0.37)         |
|                 |                 | MI      | 7 (0.04)             | 6 (0.06)             | < 5                | < 5                | 12 (0.28)          | 13 (0.40)         |
|                 |                 | HF      | 17 (0.09)            | 22 (0.23)            | < 5                | < 5                | 70 (1.61)          | 25 (0.77)         |
|                 |                 | HS      | < 5                  | < 5                  | < 5                | < 5                | < 5                | < 5               |
|                 |                 | MP      | < 5                  | < 5                  | < 5                | < 5                | < 5                | < 5               |
| <b>Cohort 3</b> |                 |         | <b>N = 1,510,493</b> | <b>N = 1,473,602</b> | <b>N = 418,184</b> | <b>N = 423,876</b> | <b>N = 873,400</b> | <b>N = 84,204</b> |
|                 | 0 to 30 days    | VTE     | 244 (1.62)           | 139 (0.94)           | 28 (0.67)          | 16 (0.38)          | 332 (3.80)         | 27 (3.21)         |
|                 |                 | DVT     | 44 (0.29)            | 41 (0.28)            | 6 (0.14)           | < 5                | 95 (1.09)          | 9 (1.07)          |
|                 |                 | PE      | 209 (1.38)           | 101 (0.69)           | 23 (0.55)          | 12 (0.28)          | 266 (3.05)         | 22 (2.61)         |
|                 |                 | ATE     | 28 (0.19)            | 47 (0.32)            | < 5                | 12 (0.28)          | 216 (2.47)         | 32 (3.80)         |
|                 |                 | IS      | < 5                  | 5 (0.03)             | < 5                | < 5                | 103 (1.18)         | 13 (1.54)         |
|                 |                 | TIA     | 5 (0.03)             | 16 (0.11)            | < 5                | < 5                | 22 (0.25)          | 5 (0.59)          |
|                 |                 | MI      | 19 (0.13)            | 26 (0.18)            | < 5                | 9 (0.21)           | 97 (1.11)          | 16 (1.90)         |
|                 |                 | HF      | 30 (0.20)            | 28 (0.19)            | < 5                | < 5                | 372 (4.26)         | 51 (6.06)         |
|                 |                 | HS      | < 5                  | < 5                  | < 5                | < 5                | 20 (0.23)          | < 5               |
|                 |                 | MP      | 9 (0.06)             | 6 (0.04)             | < 5                | < 5                | 20 (0.23)          | 6 (0.71)          |
|                 | 31 to 90 days   | VTE     | 43 (0.28)            | 44 (0.30)            | < 5                | 6 (0.14)           | 81 (0.93)          | 9 (1.07)          |
|                 |                 | DVT     | 20 (0.13)            | 26 (0.18)            | < 5                | < 5                | 54 (0.62)          | < 5               |
|                 |                 | PE      | 26 (0.17)            | 18 (0.12)            | < 5                | < 5                | 36 (0.41)          | 6 (0.71)          |
|                 |                 | ATE     | 11 (0.07)            | 31 (0.21)            | < 5                | 7 (0.17)           | 108 (1.24)         | 25 (2.97)         |
|                 |                 | IS      | < 5                  | < 5                  | < 5                | < 5                | 52 (0.60)          | 11 (1.31)         |
|                 |                 | TIA     | < 5                  | 13 (0.09)            | < 5                | < 5                | 27 (0.31)          | < 5               |

| Cohort | Time window     | Outcome    | AURUM        |                      | GOLD               |                    | SIDIAP             |            |  |
|--------|-----------------|------------|--------------|----------------------|--------------------|--------------------|--------------------|------------|--|
|        |                 |            | Unvaccinated | Vaccinated           | Unvaccinated       | Vaccinated         | Unvaccinated       | Vaccinated |  |
|        | 91 to 180 days  | MI         | 9 (0.06)     | 16 (0.11)            | < 5                | < 5                | 37 (0.42)          | 10 (1.19)  |  |
|        |                 | HF         | 14 (0.09)    | 23 (0.16)            | < 5                | < 5                | 135 (1.55)         | 25 (2.97)  |  |
|        |                 | HS         | < 5          | < 5                  | < 5                | < 5                | 7 (0.08)           | < 5        |  |
|        |                 | MP         | 8 (0.05)     | 7 (0.05)             | < 5                | < 5                | 9 (0.10)           | < 5        |  |
|        |                 | VTE        | 23 (0.15)    | 25 (0.17)            | < 5                | < 5                | 58 (0.66)          | 13 (1.54)  |  |
|        |                 | DVT        | 10 (0.07)    | 15 (0.10)            | < 5                | < 5                | 33 (0.38)          | 7 (0.83)   |  |
|        |                 | PE         | 14 (0.09)    | 13 (0.09)            | < 5                | < 5                | 29 (0.33)          | 7 (0.83)   |  |
|        |                 | ATE        | < 5          | 26 (0.18)            | < 5                | < 5                | 104 (1.19)         | 28 (3.33)  |  |
|        |                 | IS         | < 5          | < 5                  | < 5                | < 5                | 50 (0.57)          | 12 (1.43)  |  |
|        |                 | TIA        | < 5          | 8 (0.05)             | < 5                | < 5                | 20 (0.23)          | 10 (1.19)  |  |
|        |                 | MI         | < 5          | 17 (0.12)            | < 5                | < 5                | 36 (0.41)          | 8 (0.95)   |  |
|        |                 | HF         | 10 (0.07)    | 10 (0.07)            | < 5                | < 5                | 111 (1.27)         | 12 (1.43)  |  |
|        |                 | HS         | < 5          | < 5                  | < 5                | < 5                | 9 (0.10)           | < 5        |  |
|        |                 | MP         | < 5          | < 5                  | < 5                | < 5                | 8 (0.09)           | < 5        |  |
|        | 181 to 365 days | VTE        | < 5          | 9 (0.06)             | < 5                | < 5                | 31 (0.35)          | < 5        |  |
|        | DVT             | < 5        | < 5          | < 5                  | < 5                | 18 (0.21)          | < 5                |            |  |
|        | PE              | < 5        | 6 (0.04)     | < 5                  | < 5                | 15 (0.17)          | < 5                |            |  |
|        | ATE             | < 5        | < 5          | < 5                  | < 5                | 48 (0.55)          | 15 (1.78)          |            |  |
|        | IS              | < 5        | < 5          | < 5                  | < 5                | 21 (0.24)          | 6 (0.71)           |            |  |
|        | TIA             | < 5        | < 5          | < 5                  | < 5                | 11 (0.13)          | < 5                |            |  |
|        | MI              | < 5        | < 5          | < 5                  | < 5                | 17 (0.19)          | 8 (0.95)           |            |  |
|        | HF              | < 5        | < 5          | < 5                  | < 5                | 55 (0.63)          | 6 (0.71)           |            |  |
|        | HS              | < 5        | < 5          | < 5                  | < 5                | < 5                | < 5                |            |  |
|        | MP              | < 5        | < 5          | < 5                  | < 5                | < 5                | < 5                |            |  |
|        | <b>Cohort 4</b> |            |              | <b>N = 2,066,318</b> | <b>N = 542,670</b> | <b>N = 485,154</b> | <b>N = 147,744</b> |            |  |
|        | 0 to 30 days    | VTE        | 346 (1.67)   | 27 (0.50)            | 38 (0.78)          | 8 (0.54)           |                    |            |  |
| DVT    |                 | 56 (0.27)  | 7 (0.13)     | 6 (0.12)             | < 5                |                    |                    |            |  |
| PE     |                 | 302 (1.46) | 21 (0.39)    | 33 (0.68)            | 6 (0.41)           |                    |                    |            |  |
| ATE    |                 | 26 (0.13)  | 5 (0.09)     | < 5                  | < 5                |                    |                    |            |  |
| IS     |                 | < 5        | < 5          | < 5                  | < 5                |                    |                    |            |  |
| TIA    |                 | 5 (0.02)   | < 5          | < 5                  | < 5                |                    |                    |            |  |
| MI     |                 | 17 (0.08)  | < 5          | < 5                  | < 5                |                    |                    |            |  |
| HF     |                 | 28 (0.14)  | < 5          | < 5                  | < 5                |                    |                    |            |  |
| HS     |                 | < 5        | < 5          | < 5                  | < 5                |                    |                    |            |  |

| Cohort | Time window     | Outcome        | AURUM        |            | GOLD         |            | SIDIAP       |            |
|--------|-----------------|----------------|--------------|------------|--------------|------------|--------------|------------|
|        |                 |                | Unvaccinated | Vaccinated | Unvaccinated | Vaccinated | Unvaccinated | Vaccinated |
|        |                 | MP             | 14 (0.07)    | < 5        | < 5          | < 5        |              |            |
|        | 31 to 90 days   | VTE            | 57 (0.28)    | 14 (0.26)  | < 5          | < 5        |              |            |
|        |                 | DVT            | 22 (0.11)    | 8 (0.15)   | < 5          | < 5        |              |            |
|        |                 | PE             | 38 (0.18)    | 6 (0.11)   | < 5          | < 5        |              |            |
|        |                 | ATE            | 13 (0.06)    | < 5        | < 5          | < 5        |              |            |
|        |                 | IS             | < 5          | < 5        | < 5          | < 5        |              |            |
|        |                 | TIA            | < 5          | < 5        | < 5          | < 5        |              |            |
|        |                 | MI             | 9 (0.04)     | < 5        | < 5          | < 5        |              |            |
|        |                 | HF             | 14 (0.07)    | < 5        | < 5          | < 5        |              |            |
|        |                 | HS             | < 5          | < 5        | < 5          | < 5        |              |            |
|        |                 | MP             | 7 (0.03)     | < 5        | < 5          | < 5        |              |            |
|        |                 | 91 to 180 days | VTE          | 28 (0.14)  | < 5          | < 5        | < 5          |            |
|        | DVT             |                | 9 (0.04)     | < 5        | < 5          | < 5        |              |            |
|        | PE              |                | 20 (0.10)    | < 5        | < 5          | < 5        |              |            |
|        | ATE             |                | < 5          | < 5        | < 5          | < 5        |              |            |
|        | IS              |                | < 5          | < 5        | < 5          | < 5        |              |            |
|        | TIA             |                | < 5          | < 5        | < 5          | < 5        |              |            |
|        | MI              |                | < 5          | < 5        | < 5          | < 5        |              |            |
|        | HF              |                | 10 (0.05)    | < 5        | < 5          | < 5        |              |            |
|        | HS              |                | < 5          | < 5        | < 5          | < 5        |              |            |
|        | MP              |                | < 5          | < 5        | < 5          | < 5        |              |            |
|        | 181 to 365 days |                | VTE          | < 5        | < 5          | < 5        | < 5          |            |
|        |                 | DVT            | < 5          | < 5        | < 5          | < 5        |              |            |
|        |                 | PE             | < 5          | < 5        | < 5          | < 5        |              |            |
|        |                 | ATE            | < 5          | < 5        | < 5          | < 5        |              |            |
|        |                 | IS             | < 5          | < 5        | < 5          | < 5        |              |            |
|        |                 | TIA            | < 5          | < 5        | < 5          | < 5        |              |            |
|        |                 | MI             | < 5          | < 5        | < 5          | < 5        |              |            |
|        |                 | HF             | < 5          | < 5        | < 5          | < 5        |              |            |
|        |                 | HS             | < 5          | < 5        | < 5          | < 5        |              |            |
|        |                 | MP             | < 5          | < 5        | < 5          | < 5        |              |            |

VTE = Venous thromboembolism (DVT + PE), DVT = Deep vein thrombosis, PE = Pulmonary embolism, ATE = Arterial thrombosis/thromboembolism (IS + TIA + MI), IS = Ischemic stroke, TIA = Transient ischemic attack, MI = Myocardial infarction, HF = Heart failure, HS = Hemorrhagic stroke, MP = Myocarditis or Pericarditis

**Table S31: Number of records (and risk per 10,000 individuals) for post COVID-19 cardiac and thromboembolic complications, across cohorts and databases, stratified by exposure status (BNT162b2 vaccine).**

| Cohort          | Time window | Outcome    | AURUM              |                    | CORIVA            |                   | GOLD               |                   | SIDIAP             |                   |
|-----------------|-------------|------------|--------------------|--------------------|-------------------|-------------------|--------------------|-------------------|--------------------|-------------------|
|                 |             |            | Unvaccinated       | Vaccinated         | Unvaccinated      | Vaccinated        | Unvaccinated       | Vaccinated        | Unvaccinated       | Vaccinated        |
| <b>Cohort 1</b> |             |            | <b>N = 348,052</b> | <b>N = 332,790</b> | <b>N = 24,073</b> | <b>N = 19,686</b> | <b>N = 169,459</b> | <b>N = 32,755</b> | <b>N = 223,960</b> | <b>N = 88,896</b> |
| 0 to 30 days    | VTE         | 106 (3.05) | 76 (2.28)          | 76 (31.57)         | 40 (20.32)        | 8 (0.47)          | < 5                | 75 (3.35)         | 94 (10.57)         |                   |
|                 | DVT         | 21 (0.60)  | 15 (0.45)          | 14 (5.82)          | 13 (6.60)         | < 5               | < 5                | 20 (0.89)         | 29 (3.26)          |                   |
|                 | PE          | 90 (2.59)  | 64 (1.92)          | 64 (26.59)         | 28 (14.22)        | 6 (0.35)          | < 5                | 60 (2.68)         | 75 (8.44)          |                   |
|                 | ATE         | 27 (0.78)  | 45 (1.35)          | 114 (47.36)        | 61 (30.99)        | 6 (0.35)          | < 5                | 79 (3.53)         | 206 (23.17)        |                   |
|                 | IS          | 9 (0.26)   | 5 (0.15)           | 68 (28.25)         | 26 (13.21)        | < 5               | < 5                | 46 (2.05)         | 116 (13.05)        |                   |
|                 | TIA         | 5 (0.14)   | 11 (0.33)          | 22 (9.14)          | 15 (7.62)         | < 5               | < 5                | 7 (0.31)          | 41 (4.61)          |                   |
|                 | MI          | 14 (0.40)  | 29 (0.87)          | 34 (14.12)         | 27 (13.72)        | < 5               | < 5                | 28 (1.25)         | 61 (6.86)          |                   |
|                 | HF          | 59 (1.70)  | 126 (3.79)         | 393 (163.25)       | 231 (117.34)      | 9 (0.53)          | < 5                | 299 (13.35)       | 634 (71.32)        |                   |
|                 | HS          | < 5        | < 5                | < 5                | < 5               | < 5               | < 5                | 7 (0.31)          | 14 (1.57)          |                   |
|                 | MP          | < 5        | < 5                | < 5                | < 5               | < 5               | < 5                | < 5               | < 5                |                   |
| 31 to 90 days   | VTE         | 18 (0.52)  | 26 (0.78)          | 40 (16.62)         | 24 (12.19)        | < 5               | < 5                | 16 (0.71)         | 44 (4.95)          |                   |
|                 | DVT         | 9 (0.26)   | 7 (0.21)           | 19 (7.89)          | 14 (7.11)         | < 5               | < 5                | 10 (0.45)         | 29 (3.26)          |                   |
|                 | PE          | 9 (0.26)   | 19 (0.57)          | 24 (9.97)          | 10 (5.08)         | < 5               | < 5                | 6 (0.27)          | 19 (2.14)          |                   |
|                 | ATE         | 9 (0.26)   | 23 (0.69)          | 31 (12.88)         | 35 (17.78)        | < 5               | < 5                | 41 (1.83)         | 128 (14.40)        |                   |
|                 | IS          | < 5        | < 5                | 18 (7.48)          | 14 (7.11)         | < 5               | < 5                | 20 (0.89)         | 71 (7.99)          |                   |
|                 | TIA         | 5 (0.14)   | 10 (0.30)          | 7 (2.91)           | 14 (7.11)         | < 5               | < 5                | 13 (0.58)         | 32 (3.60)          |                   |
|                 | MI          | 5 (0.14)   | 11 (0.33)          | 11 (4.57)          | 10 (5.08)         | < 5               | < 5                | 11 (0.49)         | 29 (3.26)          |                   |
|                 | HF          | 32 (0.92)  | 71 (2.13)          | 151 (62.73)        | 141 (71.62)       | < 5               | < 5                | 87 (3.88)         | 296 (33.30)        |                   |
|                 | HS          | < 5        | < 5                | < 5                | < 5               | < 5               | < 5                | < 5               | 13 (1.46)          |                   |
|                 | MP          | < 5        | < 5                | < 5                | < 5               | < 5               | < 5                | < 5               | < 5                |                   |
| 91 to 180 days  | VTE         | 10 (0.29)  | 6 (0.18)           | 19 (7.89)          | 27 (13.72)        | < 5               | < 5                | 21 (0.94)         | 40 (4.50)          |                   |
|                 | DVT         | < 5        | < 5                | 11 (4.57)          | 14 (7.11)         | < 5               | < 5                | 9 (0.40)          | 23 (2.59)          |                   |
|                 | PE          | 6 (0.17)   | < 5                | 9 (3.74)           | 14 (7.11)         | < 5               | < 5                | 12 (0.54)         | 20 (2.25)          |                   |
|                 | ATE         | 15 (0.43)  | 18 (0.54)          | 31 (12.88)         | 40 (20.32)        | < 5               | < 5                | 31 (1.38)         | 110 (12.37)        |                   |
|                 | IS          | < 5        | 6 (0.18)           | 16 (6.65)          | 17 (8.64)         | < 5               | < 5                | 17 (0.76)         | 59 (6.64)          |                   |
|                 | TIA         | 8 (0.23)   | 6 (0.18)           | 8 (3.32)           | 11 (5.59)         | < 5               | < 5                | 8 (0.36)          | 34 (3.82)          |                   |
|                 | MI          | 5 (0.14)   | 6 (0.18)           | 8 (3.32)           | 16 (8.13)         | < 5               | < 5                | 7 (0.31)          | 26 (2.92)          |                   |
|                 | HF          | 43 (1.24)  | 57 (1.71)          | 166 (68.96)        | 169 (85.85)       | < 5               | < 5                | 87 (3.88)         | 249 (28.01)        |                   |
|                 | HS          | < 5        | < 5                | < 5                | < 5               | < 5               | < 5                | < 5               | < 5                |                   |
|                 | MP          | < 5        | < 5                | < 5                | < 5               | < 5               | < 5                | < 5               | < 5                |                   |

| Cohort          | Time window     | Outcome | AURUM                |                    | CORIVA       |              | GOLD               |                    | SIDIAP             |                    |
|-----------------|-----------------|---------|----------------------|--------------------|--------------|--------------|--------------------|--------------------|--------------------|--------------------|
|                 |                 |         | Unvaccinated         | Vaccinated         | Unvaccinated | Vaccinated   | Unvaccinated       | Vaccinated         | Unvaccinated       | Vaccinated         |
|                 | 181 to 365 days | VTE     | 14 (0.40)            | 10 (0.30)          | 43 (17.86)   | 31 (15.75)   | < 5                | < 5                | 10 (0.45)          | 12 (1.35)          |
|                 |                 | DVT     | < 5                  | 6 (0.18)           | 16 (6.65)    | 18 (9.14)    | < 5                | < 5                | 5 (0.22)           | 8 (0.90)           |
|                 |                 | PE      | 11 (0.32)            | < 5                | 31 (12.88)   | 14 (7.11)    | < 5                | < 5                | 5 (0.22)           | < 5                |
|                 |                 | ATE     | 15 (0.43)            | 14 (0.42)          | 57 (23.68)   | 62 (31.49)   | < 5                | < 5                | 41 (1.83)          | 52 (5.85)          |
|                 |                 | IS      | < 5                  | < 5                | 32 (13.29)   | 30 (15.24)   | < 5                | < 5                | 20 (0.89)          | 33 (3.71)          |
|                 |                 | TIA     | 10 (0.29)            | < 5                | 16 (6.65)    | 24 (12.19)   | < 5                | < 5                | 11 (0.49)          | 13 (1.46)          |
|                 |                 | MI      | < 5                  | 7 (0.21)           | 14 (5.82)    | 16 (8.13)    | < 5                | < 5                | 10 (0.45)          | 8 (0.90)           |
|                 |                 | HF      | 52 (1.49)            | 38 (1.14)          | 278 (115.48) | 244 (123.95) | < 5                | < 5                | 82 (3.66)          | 149 (16.76)        |
|                 |                 | HS      | < 5                  | < 5                | < 5          | < 5          | < 5                | < 5                | < 5                | 9 (1.01)           |
|                 |                 | MP      | < 5                  | < 5                | < 5          | < 5          | < 5                | < 5                | < 5                | < 5                |
| <b>Cohort 2</b> |                 |         | <b>N = 1,976,163</b> | <b>N = 594,262</b> |              |              | <b>N = 584,309</b> | <b>N = 180,670</b> | <b>N = 433,111</b> | <b>N = 445,581</b> |
|                 | 0 to 30 days    | VTE     | 240 (1.21)           | 62 (1.04)          |              |              | 29 (0.50)          | 5 (0.28)           | 259 (5.98)         | 265 (5.95)         |
|                 |                 | DVT     | 39 (0.20)            | 18 (0.30)          |              |              | 7 (0.12)           | < 5                | 63 (1.45)          | 96 (2.15)          |
|                 |                 | PE      | 205 (1.04)           | 45 (0.76)          |              |              | 23 (0.39)          | < 5                | 215 (4.96)         | 189 (4.24)         |
|                 |                 | ATE     | 39 (0.20)            | 29 (0.49)          |              |              | < 5                | < 5                | 172 (3.97)         | 489 (10.97)        |
|                 |                 | IS      | 7 (0.04)             | < 5                |              |              | < 5                | < 5                | 94 (2.17)          | 267 (5.99)         |
|                 |                 | TIA     | 6 (0.03)             | 11 (0.19)          |              |              | < 5                | < 5                | 17 (0.39)          | 90 (2.02)          |
|                 |                 | MI      | 26 (0.13)            | 16 (0.27)          |              |              | < 5                | < 5                | 65 (1.50)          | 163 (3.66)         |
|                 |                 | HF      | 50 (0.25)            | 43 (0.72)          |              |              | 6 (0.10)           | < 5                | 380 (8.77)         | 1,137 (25.52)      |
|                 |                 | HS      | 6 (0.03)             | < 5                |              |              | < 5                | < 5                | 18 (0.42)          | 61 (1.37)          |
|                 |                 | MP      | 11 (0.06)            | < 5                |              |              | < 5                | < 5                | 14 (0.32)          | 22 (0.49)          |
|                 | 31 to 90 days   | VTE     | 49 (0.25)            | 21 (0.35)          |              |              | < 5                | < 5                | 60 (1.39)          | 128 (2.87)         |
|                 |                 | DVT     | 26 (0.13)            | 7 (0.12)           |              |              | < 5                | < 5                | 33 (0.76)          | 81 (1.82)          |
|                 |                 | PE      | 26 (0.13)            | 14 (0.24)          |              |              | < 5                | < 5                | 34 (0.79)          | 56 (1.26)          |
|                 |                 | ATE     | 17 (0.09)            | 36 (0.61)          |              |              | < 5                | < 5                | 86 (1.99)          | 313 (7.02)         |
|                 |                 | IS      | < 5                  | 5 (0.08)           |              |              | < 5                | < 5                | 43 (0.99)          | 167 (3.75)         |
|                 |                 | TIA     | < 5                  | 9 (0.15)           |              |              | < 5                | < 5                | 24 (0.55)          | 86 (1.93)          |
|                 |                 | MI      | 11 (0.06)            | 22 (0.37)          |              |              | < 5                | < 5                | 26 (0.60)          | 80 (1.80)          |
|                 |                 | HF      | 27 (0.14)            | 35 (0.59)          |              |              | < 5                | < 5                | 137 (3.16)         | 554 (12.43)        |
|                 |                 | HS      | < 5                  | < 5                |              |              | < 5                | < 5                | 7 (0.16)           | 19 (0.43)          |
|                 |                 | MP      | 6 (0.03)             | < 5                |              |              | < 5                | < 5                | < 5                | < 5                |
|                 | 91 to 180 days  | VTE     | 28 (0.14)            | 10 (0.17)          |              |              | 5 (0.09)           | < 5                | 59 (1.36)          | 96 (2.15)          |
|                 |                 | DVT     | 12 (0.06)            | 6 (0.10)           |              |              | < 5                | < 5                | 32 (0.74)          | 59 (1.32)          |
|                 |                 | PE      | 16 (0.08)            | 5 (0.08)           |              |              | < 5                | < 5                | 30 (0.69)          | 45 (1.01)          |

| Cohort          | Time window            | Outcome    | AURUM                |                   | CORIVA       |            | GOLD               |                   | SIDIAP             |                    |
|-----------------|------------------------|------------|----------------------|-------------------|--------------|------------|--------------------|-------------------|--------------------|--------------------|
|                 |                        |            | Unvaccinated         | Vaccinated        | Unvaccinated | Vaccinated | Unvaccinated       | Vaccinated        | Unvaccinated       | Vaccinated         |
|                 |                        | <b>ATE</b> | 14 (0.07)            | 15 (0.25)         |              |            | < 5                | < 5               | 90 (2.08)          | 287 (6.44)         |
|                 |                        | <b>IS</b>  | < 5                  | < 5               |              |            | < 5                | < 5               | 49 (1.13)          | 168 (3.77)         |
|                 |                        | <b>TIA</b> | 7 (0.04)             | 5 (0.08)          |              |            | < 5                | < 5               | 21 (0.48)          | 76 (1.71)          |
|                 |                        | <b>MI</b>  | 8 (0.04)             | 10 (0.17)         |              |            | < 5                | < 5               | 23 (0.53)          | 63 (1.41)          |
|                 |                        | <b>HF</b>  | 19 (0.10)            | 25 (0.42)         |              |            | < 5                | < 5               | 110 (2.54)         | 472 (10.59)        |
|                 |                        | <b>HS</b>  | < 5                  | < 5               |              |            | < 5                | < 5               | 7 (0.16)           | 34 (0.76)          |
|                 |                        | <b>MP</b>  | < 5                  | < 5               |              |            | < 5                | < 5               | 7 (0.16)           | < 5                |
|                 | <b>181 to 365 days</b> | <b>VTE</b> | 10 (0.05)            | 8 (0.13)          |              |            | < 5                | < 5               | 16 (0.37)          | 40 (0.90)          |
|                 |                        | <b>DVT</b> | < 5                  | < 5               |              |            | < 5                | < 5               | 10 (0.23)          | 26 (0.58)          |
|                 |                        | <b>PE</b>  | 8 (0.04)             | 7 (0.12)          |              |            | < 5                | < 5               | 8 (0.18)           | 16 (0.36)          |
|                 |                        | <b>ATE</b> | 12 (0.06)            | 7 (0.12)          |              |            | < 5                | < 5               | 59 (1.36)          | 123 (2.76)         |
|                 |                        | <b>IS</b>  | < 5                  | < 5               |              |            | < 5                | < 5               | 29 (0.67)          | 58 (1.30)          |
|                 |                        | <b>TIA</b> | < 5                  | < 5               |              |            | < 5                | < 5               | 18 (0.42)          | 39 (0.88)          |
|                 |                        | <b>MI</b>  | 9 (0.05)             | < 5               |              |            | < 5                | < 5               | 14 (0.32)          | 32 (0.72)          |
|                 |                        | <b>HF</b>  | 23 (0.12)            | 12 (0.20)         |              |            | < 5                | < 5               | 73 (1.69)          | 212 (4.76)         |
|                 |                        | <b>HS</b>  | < 5                  | < 5               |              |            | < 5                | < 5               | 6 (0.14)           | 12 (0.27)          |
|                 |                        | <b>MP</b>  | < 5                  | < 5               |              |            | < 5                | < 5               | < 5                | < 5                |
| <b>Cohort 3</b> |                        |            | <b>N = 1,510,323</b> | <b>N = 54,102</b> |              |            | <b>N = 416,549</b> | <b>N = 36,748</b> | <b>N = 869,109</b> | <b>N = 706,435</b> |
|                 | <b>0 to 30 days</b>    | <b>VTE</b> | 244 (1.62)           | < 5               |              |            | 28 (0.67)          | < 5               | 321 (3.69)         | 114 (1.61)         |
|                 |                        | <b>DVT</b> | 44 (0.29)            | < 5               |              |            | 6 (0.14)           | < 5               | 89 (1.02)          | 51 (0.72)          |
|                 |                        | <b>PE</b>  | 209 (1.38)           | < 5               |              |            | 23 (0.55)          | < 5               | 259 (2.98)         | 71 (1.01)          |
|                 |                        | <b>ATE</b> | 29 (0.19)            | < 5               |              |            | < 5                | < 5               | 211 (2.43)         | 197 (2.79)         |
|                 |                        | <b>IS</b>  | < 5                  | < 5               |              |            | < 5                | < 5               | 102 (1.17)         | 95 (1.34)          |
|                 |                        | <b>TIA</b> | 5 (0.03)             | < 5               |              |            | < 5                | < 5               | 20 (0.23)          | 42 (0.59)          |
|                 |                        | <b>MI</b>  | 20 (0.13)            | < 5               |              |            | < 5                | < 5               | 95 (1.09)          | 78 (1.10)          |
|                 |                        | <b>HF</b>  | 30 (0.20)            | 10 (1.85)         |              |            | < 5                | < 5               | 366 (4.21)         | 163 (2.31)         |
|                 |                        | <b>HS</b>  | < 5                  | < 5               |              |            | < 5                | < 5               | 20 (0.23)          | 26 (0.37)          |
|                 |                        | <b>MP</b>  | 9 (0.06)             | < 5               |              |            | < 5                | < 5               | 19 (0.22)          | 13 (0.18)          |
|                 | <b>31 to 90 days</b>   | <b>VTE</b> | 44 (0.29)            | < 5               |              |            | < 5                | < 5               | 84 (0.97)          | 65 (0.92)          |
|                 |                        | <b>DVT</b> | 20 (0.13)            | < 5               |              |            | < 5                | < 5               | 56 (0.64)          | 47 (0.67)          |
|                 |                        | <b>PE</b>  | 27 (0.18)            | < 5               |              |            | < 5                | < 5               | 38 (0.44)          | 23 (0.33)          |
|                 |                        | <b>ATE</b> | 11 (0.07)            | < 5               |              |            | < 5                | < 5               | 107 (1.23)         | 144 (2.04)         |
|                 |                        | <b>IS</b>  | < 5                  | < 5               |              |            | < 5                | < 5               | 53 (0.61)          | 55 (0.78)          |
|                 |                        | <b>TIA</b> | < 5                  | < 5               |              |            | < 5                | < 5               | 27 (0.31)          | 28 (0.40)          |



| Cohort          | Time window     | Outcome    | AURUM                |                      | CORIVA             |                   | GOLD               |                    | SIDIAP               |                    |
|-----------------|-----------------|------------|----------------------|----------------------|--------------------|-------------------|--------------------|--------------------|----------------------|--------------------|
|                 |                 |            | Unvaccinated         | Vaccinated           | Unvaccinated       | Vaccinated        | Unvaccinated       | Vaccinated         | Unvaccinated         | Vaccinated         |
|                 | 91 to 180 days  | MI         | 9 (0.06)             | < 5                  |                    |                   | < 5                | < 5                | 35 (0.40)            | 69 (0.98)          |
|                 |                 | HF         | 15 (0.10)            | < 5                  |                    |                   | < 5                | < 5                | 139 (1.60)           | 111 (1.57)         |
|                 |                 | HS         | < 5                  | < 5                  |                    |                   | < 5                | < 5                | 7 (0.08)             | 14 (0.20)          |
|                 |                 | MP         | 8 (0.05)             | < 5                  |                    |                   | < 5                | < 5                | 8 (0.09)             | 9 (0.13)           |
|                 |                 | VTE        | 24 (0.16)            | < 5                  |                    |                   | < 5                | < 5                | 63 (0.72)            | 71 (1.01)          |
|                 |                 | DVT        | 11 (0.07)            | < 5                  |                    |                   | < 5                | < 5                | 35 (0.40)            | 45 (0.64)          |
|                 |                 | PE         | 14 (0.09)            | < 5                  |                    |                   | < 5                | < 5                | 32 (0.37)            | 27 (0.38)          |
|                 |                 | ATE        | < 5                  | < 5                  |                    |                   | < 5                | < 5                | 112 (1.29)           | 141 (2.00)         |
|                 |                 | IS         | < 5                  | < 5                  |                    |                   | < 5                | < 5                | 57 (0.66)            | 65 (0.92)          |
|                 |                 | TIA        | < 5                  | < 5                  |                    |                   | < 5                | < 5                | 22 (0.25)            | 29 (0.41)          |
|                 |                 | MI         | < 5                  | < 5                  |                    |                   | < 5                | < 5                | 36 (0.41)            | 53 (0.75)          |
|                 |                 | HF         | 10 (0.07)            | < 5                  |                    |                   | < 5                | < 5                | 121 (1.39)           | 100 (1.42)         |
|                 |                 | HS         | < 5                  | < 5                  |                    |                   | < 5                | < 5                | 9 (0.10)             | 10 (0.14)          |
|                 |                 | MP         | < 5                  | < 5                  |                    |                   | < 5                | < 5                | 7 (0.08)             | 9 (0.13)           |
|                 | 181 to 365 days | VTE        | < 5                  | < 5                  |                    |                   | < 5                | < 5                | 36 (0.41)            | 17 (0.24)          |
|                 | DVT             | < 5        | < 5                  |                      |                    | < 5               | < 5                | 22 (0.25)          | 14 (0.20)            |                    |
|                 | PE              | < 5        | < 5                  |                      |                    | < 5               | < 5                | 16 (0.18)          | < 5                  |                    |
|                 | ATE             | < 5        | < 5                  |                      |                    | < 5               | < 5                | 48 (0.55)          | 45 (0.64)            |                    |
|                 | IS              | < 5        | < 5                  |                      |                    | < 5               | < 5                | 23 (0.26)          | 17 (0.24)            |                    |
|                 | TIA             | < 5        | < 5                  |                      |                    | < 5               | < 5                | 9 (0.10)           | 7 (0.10)             |                    |
|                 | MI              | < 5        | < 5                  |                      |                    | < 5               | < 5                | 17 (0.20)          | 24 (0.34)            |                    |
|                 | HF              | 5 (0.03)   | < 5                  |                      |                    | < 5               | < 5                | 61 (0.70)          | 31 (0.44)            |                    |
|                 | HS              | < 5        | < 5                  |                      |                    | < 5               | < 5                | < 5                | < 5                  |                    |
|                 | MP              | < 5        | < 5                  |                      |                    | < 5               | < 5                | < 5                | < 5                  |                    |
| <b>Cohort 4</b> |                 |            | <b>N = 2,014,161</b> | <b>N = 1,335,671</b> | <b>N = 147,553</b> | <b>N = 15,683</b> | <b>N = 465,326</b> | <b>N = 365,096</b> | <b>N = 1,068,043</b> | <b>N = 580,329</b> |
| 0 to 30 days    | VTE             | 328 (1.63) | 20 (0.15)            | 116 (7.86)           | < 5                | 36 (0.77)         | < 5                | 350 (3.28)         | 66 (1.14)            |                    |
|                 | DVT             | 52 (0.26)  | 9 (0.07)             | 22 (1.49)            | < 5                | 6 (0.13)          | < 5                | 107 (1.00)         | 35 (0.60)            |                    |
|                 | PE              | 287 (1.42) | 11 (0.08)            | 97 (6.57)            | < 5                | 31 (0.67)         | < 5                | 271 (2.54)         | 35 (0.60)            |                    |
|                 | ATE             | 25 (0.12)  | < 5                  | 116 (7.86)           | < 5                | < 5               | < 5                | 233 (2.18)         | 55 (0.95)            |                    |
|                 | IS              | < 5        | < 5                  | 69 (4.68)            | < 5                | < 5               | < 5                | 114 (1.07)         | 29 (0.50)            |                    |
|                 | TIA             | 6 (0.03)   | < 5                  | 18 (1.22)            | < 5                | < 5               | < 5                | 28 (0.26)          | 7 (0.12)             |                    |
|                 | MI              | 15 (0.07)  | < 5                  | 38 (2.58)            | < 5                | < 5               | < 5                | 97 (0.91)          | 20 (0.34)            |                    |
|                 | HF              | 26 (0.13)  | < 5                  | 362 (24.53)          | 8 (5.10)           | < 5               | < 5                | 369 (3.45)         | 44 (0.76)            |                    |
|                 | HS              | < 5        | < 5                  | 5 (0.34)             | < 5                | < 5               | < 5                | 24 (0.22)          | 7 (0.12)             |                    |

| Cohort         | Time window     | Outcome   | AURUM        |             | CORIVA       |            | GOLD         |            | SIDIAP       |            |
|----------------|-----------------|-----------|--------------|-------------|--------------|------------|--------------|------------|--------------|------------|
|                |                 |           | Unvaccinated | Vaccinated  | Unvaccinated | Vaccinated | Unvaccinated | Vaccinated | Unvaccinated | Vaccinated |
| 31 to 90 days  | MP              | 13 (0.06) | < 5          | 7 (0.47)    | < 5          | < 5        | < 5          | 26 (0.24)  | 11 (0.19)    |            |
|                | VTE             | 56 (0.28) | 7 (0.05)     | 54 (3.66)   | < 5          | < 5        | < 5          | 93 (0.87)  | 33 (0.57)    |            |
|                | DVT             | 20 (0.10) | < 5          | 32 (2.17)   | < 5          | < 5        | < 5          | 62 (0.58)  | 23 (0.40)    |            |
|                | PE              | 39 (0.19) | < 5          | 26 (1.76)   | < 5          | < 5        | < 5          | 41 (0.38)  | 11 (0.19)    |            |
|                | ATE             | 13 (0.06) | < 5          | 46 (3.12)   | < 5          | < 5        | < 5          | 115 (1.08) | 51 (0.88)    |            |
|                | IS              | < 5       | < 5          | 24 (1.63)   | < 5          | < 5        | < 5          | 51 (0.48)  | 21 (0.36)    |            |
|                | TIA             | < 5       | < 5          | 6 (0.41)    | < 5          | < 5        | < 5          | 31 (0.29)  | 12 (0.21)    |            |
|                | MI              | 9 (0.04)  | < 5          | 19 (1.29)   | < 5          | < 5        | < 5          | 41 (0.38)  | 21 (0.36)    |            |
|                | HF              | 14 (0.07) | 6 (0.04)     | 174 (11.79) | 5 (3.19)     | < 5        | < 5          | 143 (1.34) | 28 (0.48)    |            |
|                | HS              | < 5       | < 5          | < 5         | < 5          | < 5        | < 5          | 10 (0.09)  | 5 (0.09)     |            |
|                | MP              | 7 (0.03)  | < 5          | 5 (0.34)    | < 5          | < 5        | < 5          | 12 (0.11)  | 8 (0.14)     |            |
| 91 to 180 days | VTE             | 24 (0.12) | 9 (0.07)     | 49 (3.32)   | < 5          | < 5        | < 5          | 77 (0.72)  | 45 (0.78)    |            |
|                | DVT             | 11 (0.05) | 7 (0.05)     | 31 (2.10)   | < 5          | < 5        | < 5          | 42 (0.39)  | 28 (0.48)    |            |
|                | PE              | 14 (0.07) | < 5          | 19 (1.29)   | < 5          | < 5        | < 5          | 38 (0.36)  | 20 (0.34)    |            |
|                | ATE             | < 5       | < 5          | 41 (2.78)   | < 5          | < 5        | < 5          | 134 (1.25) | 71 (1.22)    |            |
|                | IS              | < 5       | < 5          | 19 (1.29)   | < 5          | < 5        | < 5          | 66 (0.62)  | 37 (0.64)    |            |
|                | TIA             | < 5       | < 5          | 12 (0.81)   | < 5          | < 5        | < 5          | 31 (0.29)  | 14 (0.24)    |            |
|                | MI              | < 5       | < 5          | 14 (0.95)   | < 5          | < 5        | < 5          | 40 (0.37)  | 20 (0.34)    |            |
|                | HF              | 9 (0.04)  | < 5          | 208 (14.10) | < 5          | < 5        | < 5          | 145 (1.36) | 35 (0.60)    |            |
|                | HS              | < 5       | < 5          | < 5         | < 5          | < 5        | < 5          | 15 (0.14)  | < 5          |            |
|                | MP              | < 5       | < 5          | 5 (0.34)    | < 5          | < 5        | < 5          | 13 (0.12)  | < 5          |            |
|                | 181 to 365 days | VTE       | < 5          | < 5         | 77 (5.22)    | 5 (3.19)   | < 5          | < 5        | 52 (0.49)    | 10 (0.17)  |
| DVT            |                 | < 5       | < 5          | 46 (3.12)   | < 5          | < 5        | < 5          | 36 (0.34)  | 8 (0.14)     |            |
| PE             |                 | < 5       | < 5          | 35 (2.37)   | < 5          | < 5        | < 5          | 18 (0.17)  | < 5          |            |
| ATE            |                 | < 5       | < 5          | 72 (4.88)   | < 5          | < 5        | < 5          | 52 (0.49)  | 21 (0.36)    |            |
| IS             |                 | < 5       | < 5          | 33 (2.24)   | < 5          | < 5        | < 5          | 28 (0.26)  | 11 (0.19)    |            |
| TIA            |                 | < 5       | < 5          | 18 (1.22)   | < 5          | < 5        | < 5          | 10 (0.09)  | < 5          |            |
| MI             |                 | < 5       | < 5          | 27 (1.83)   | < 5          | < 5        | < 5          | 15 (0.14)  | 9 (0.16)     |            |
| HF             |                 | < 5       | < 5          | 298 (20.20) | 5 (3.19)     | < 5        | < 5          | 58 (0.54)  | 8 (0.14)     |            |
| HS             |                 | < 5       | < 5          | 8 (0.54)    | < 5          | < 5        | < 5          | 5 (0.05)   | < 5          |            |
| MP             |                 | < 5       | < 5          | 5 (0.34)    | < 5          | < 5        | < 5          | 6 (0.06)   | < 5          |            |

VTE = Venous thromboembolism (DVT + PE), DVT = Deep vein thrombosis, PE = Pulmonary embolism, ATE = Arterial thrombosis/thromboembolism (IS + TIA + MI), IS = Ischemic stroke, TIA = Transient ischemic attack, MI = Myocardial infarction, HF = Heart failure, HS = Hemorrhagic stroke, MP = Myocarditis or Pericarditis

**Table S32: Number of records (and risk per 10,000 individuals) for post COVID-19 cardiac and thromboembolic complications, across cohorts and databases, stratified by exposure status (BNT162b2 vaccine). Follow-up ends at first vaccine dose after index date.**

| Cohort          | Time window           | Outcome    | AURUM              |                    | CORIVA            |                   | GOLD               |                   | SIDIAP             |                   |
|-----------------|-----------------------|------------|--------------------|--------------------|-------------------|-------------------|--------------------|-------------------|--------------------|-------------------|
|                 |                       |            | Unvaccinated       | Vaccinated         | Unvaccinated      | Vaccinated        | Unvaccinated       | Vaccinated        | Unvaccinated       | Vaccinated        |
| <b>Cohort 1</b> |                       |            | <b>N = 348,052</b> | <b>N = 332,790</b> | <b>N = 24,073</b> | <b>N = 19,686</b> | <b>N = 169,459</b> | <b>N = 32,755</b> | <b>N = 223,960</b> | <b>N = 88,896</b> |
|                 | <b>0 to 30 days</b>   | <b>VTE</b> | 106 (3.05)         | 31 (0.93)          | 76 (31.57)        | < 5               | 8 (0.47)           | < 5               | 75 (3.35)          | < 5               |
|                 |                       | <b>DVT</b> | 21 (0.60)          | 8 (0.24)           | 14 (5.82)         | < 5               | < 5                | < 5               | 20 (0.89)          | < 5               |
|                 |                       | <b>PE</b>  | 90 (2.59)          | 24 (0.72)          | 64 (26.59)        | < 5               | 6 (0.35)           | < 5               | 60 (2.68)          | < 5               |
|                 |                       | <b>ATE</b> | 27 (0.78)          | 18 (0.54)          | 114 (47.36)       | < 5               | 6 (0.35)           | < 5               | 79 (3.53)          | 5 (0.56)          |
|                 |                       | <b>IS</b>  | 9 (0.26)           | < 5                | 68 (28.25)        | < 5               | < 5                | < 5               | 46 (2.05)          | < 5               |
|                 |                       | <b>TIA</b> | 5 (0.14)           | < 5                | 22 (9.14)         | < 5               | < 5                | < 5               | 7 (0.31)           | < 5               |
|                 |                       | <b>MI</b>  | 14 (0.40)          | 14 (0.42)          | 34 (14.12)        | < 5               | < 5                | < 5               | 28 (1.25)          | < 5               |
|                 |                       | <b>HF</b>  | 59 (1.70)          | 45 (1.35)          | 393 (163.25)      | 20 (10.16)        | 9 (0.53)           | < 5               | 299 (13.35)        | 23 (2.59)         |
|                 |                       | <b>HS</b>  | < 5                | < 5                | < 5               | < 5               | < 5                | < 5               | 7 (0.31)           | < 5               |
|                 |                       | <b>MP</b>  | < 5                | < 5                | < 5               | < 5               | < 5                | < 5               | < 5                | < 5               |
|                 | <b>31 to 90 days</b>  | <b>VTE</b> | 18 (0.52)          | 15 (0.45)          | 40 (16.62)        | < 5               | < 5                | < 5               | 16 (0.71)          | < 5               |
|                 |                       | <b>DVT</b> | 9 (0.26)           | < 5                | 19 (7.89)         | < 5               | < 5                | < 5               | 10 (0.45)          | < 5               |
|                 |                       | <b>PE</b>  | 9 (0.26)           | 11 (0.33)          | 24 (9.97)         | < 5               | < 5                | < 5               | 6 (0.27)           | < 5               |
|                 |                       | <b>ATE</b> | 9 (0.26)           | 8 (0.24)           | 31 (12.88)        | < 5               | < 5                | < 5               | 41 (1.83)          | 5 (0.56)          |
|                 |                       | <b>IS</b>  | < 5                | < 5                | 18 (7.48)         | < 5               | < 5                | < 5               | 20 (0.89)          | < 5               |
|                 |                       | <b>TIA</b> | 5 (0.14)           | < 5                | 7 (2.91)          | < 5               | < 5                | < 5               | 13 (0.58)          | < 5               |
|                 |                       | <b>MI</b>  | 5 (0.14)           | < 5                | 11 (4.57)         | < 5               | < 5                | < 5               | 11 (0.49)          | < 5               |
|                 |                       | <b>HF</b>  | 32 (0.92)          | 36 (1.08)          | 151 (62.73)       | 11 (5.59)         | < 5                | < 5               | 87 (3.88)          | 8 (0.90)          |
|                 |                       | <b>HS</b>  | < 5                | < 5                | < 5               | < 5               | < 5                | < 5               | < 5                | < 5               |
|                 |                       | <b>MP</b>  | < 5                | < 5                | < 5               | < 5               | < 5                | < 5               | < 5                | < 5               |
|                 | <b>91 to 180 days</b> | <b>VTE</b> | 10 (0.29)          | < 5                | 19 (7.89)         | < 5               | < 5                | < 5               | 21 (0.94)          | < 5               |
|                 |                       | <b>DVT</b> | < 5                | < 5                | 11 (4.57)         | < 5               | < 5                | < 5               | 9 (0.40)           | < 5               |
|                 |                       | <b>PE</b>  | 6 (0.17)           | < 5                | 9 (3.74)          | < 5               | < 5                | < 5               | 12 (0.54)          | < 5               |
|                 |                       | <b>ATE</b> | 15 (0.43)          | 10 (0.30)          | 31 (12.88)        | < 5               | < 5                | < 5               | 31 (1.38)          | < 5               |
|                 |                       | <b>IS</b>  | < 5                | < 5                | 16 (6.65)         | < 5               | < 5                | < 5               | 17 (0.76)          | < 5               |
|                 |                       | <b>TIA</b> | 8 (0.23)           | < 5                | 8 (3.32)          | < 5               | < 5                | < 5               | 8 (0.36)           | < 5               |
|                 |                       | <b>MI</b>  | 5 (0.14)           | < 5                | 8 (3.32)          | < 5               | < 5                | < 5               | 7 (0.31)           | < 5               |
|                 |                       | <b>HF</b>  | 43 (1.24)          | 32 (0.96)          | 166 (68.96)       | 14 (7.11)         | < 5                | < 5               | 87 (3.88)          | 6 (0.67)          |
|                 |                       | <b>HS</b>  | < 5                | < 5                | < 5               | < 5               | < 5                | < 5               | < 5                | < 5               |
|                 |                       | <b>MP</b>  | < 5                | < 5                | < 5               | < 5               | < 5                | < 5               | < 5                | < 5               |

| Cohort          | Time window     | Outcome   | AURUM                |                    | CORIVA       |            | GOLD               |                    | SIDIAP             |                    |
|-----------------|-----------------|-----------|----------------------|--------------------|--------------|------------|--------------------|--------------------|--------------------|--------------------|
|                 |                 |           | Unvaccinated         | Vaccinated         | Unvaccinated | Vaccinated | Unvaccinated       | Vaccinated         | Unvaccinated       | Vaccinated         |
|                 | 181 to 365 days | VTE       | 14 (0.40)            | 7 (0.21)           | 43 (17.86)   | 6 (3.05)   | < 5                | < 5                | 10 (0.45)          | < 5                |
|                 |                 | DVT       | < 5                  | < 5                | 16 (6.65)    | < 5        | < 5                | < 5                | 5 (0.22)           | < 5                |
|                 |                 | PE        | 11 (0.32)            | < 5                | 31 (12.88)   | < 5        | < 5                | < 5                | 5 (0.22)           | < 5                |
|                 |                 | ATE       | 15 (0.43)            | 11 (0.33)          | 57 (23.68)   | 10 (5.08)  | < 5                | < 5                | 41 (1.83)          | 8 (0.90)           |
|                 |                 | IS        | < 5                  | < 5                | 32 (13.29)   | 9 (4.57)   | < 5                | < 5                | 20 (0.89)          | 5 (0.56)           |
|                 |                 | TIA       | 10 (0.29)            | < 5                | 16 (6.65)    | < 5        | < 5                | < 5                | 11 (0.49)          | < 5                |
|                 |                 | MI        | < 5                  | 6 (0.18)           | 14 (5.82)    | < 5        | < 5                | < 5                | 10 (0.45)          | < 5                |
|                 |                 | HF        | 52 (1.49)            | 35 (1.05)          | 278 (115.48) | 37 (18.80) | < 5                | < 5                | 82 (3.66)          | 20 (2.25)          |
|                 |                 | HS        | < 5                  | < 5                | < 5          | < 5        | < 5                | < 5                | < 5                | < 5                |
|                 |                 | MP        | < 5                  | < 5                | < 5          | < 5        | < 5                | < 5                | < 5                | < 5                |
| <b>Cohort 2</b> |                 |           | <b>N = 1,976,163</b> | <b>N = 594,262</b> |              |            | <b>N = 584,309</b> | <b>N = 180,670</b> | <b>N = 433,111</b> | <b>N = 445,581</b> |
|                 | 0 to 30 days    | VTE       | 240 (1.21)           | 14 (0.24)          |              |            | 29 (0.50)          | < 5                | 259 (5.98)         | 14 (0.31)          |
|                 |                 | DVT       | 39 (0.20)            | 6 (0.10)           |              |            | 7 (0.12)           | < 5                | 63 (1.45)          | < 5                |
|                 |                 | PE        | 205 (1.04)           | 8 (0.13)           |              |            | 23 (0.39)          | < 5                | 215 (4.96)         | 12 (0.27)          |
|                 |                 | ATE       | 39 (0.20)            | 14 (0.24)          |              |            | < 5                | < 5                | 172 (3.97)         | 16 (0.36)          |
|                 |                 | IS        | 7 (0.04)             | < 5                |              |            | < 5                | < 5                | 94 (2.17)          | 8 (0.18)           |
|                 |                 | TIA       | 6 (0.03)             | < 5                |              |            | < 5                | < 5                | 17 (0.39)          | < 5                |
|                 |                 | MI        | 26 (0.13)            | 8 (0.13)           |              |            | < 5                | < 5                | 65 (1.50)          | 5 (0.11)           |
|                 |                 | HF        | 50 (0.25)            | 15 (0.25)          |              |            | 6 (0.10)           | < 5                | 380 (8.77)         | 56 (1.26)          |
|                 |                 | HS        | 6 (0.03)             | < 5                |              |            | < 5                | < 5                | 18 (0.42)          | < 5                |
|                 |                 | MP        | 11 (0.06)            | < 5                |              |            | < 5                | < 5                | 14 (0.32)          | < 5                |
|                 | 31 to 90 days   | VTE       | 49 (0.25)            | 5 (0.08)           |              |            | < 5                | < 5                | 60 (1.39)          | 6 (0.13)           |
|                 |                 | DVT       | 26 (0.13)            | < 5                |              |            | < 5                | < 5                | 33 (0.76)          | < 5                |
|                 |                 | PE        | 26 (0.13)            | < 5                |              |            | < 5                | < 5                | 34 (0.79)          | < 5                |
| ATE             |                 | 17 (0.09) | 9 (0.15)             |                    |              | < 5        | < 5                | 86 (1.99)          | 7 (0.16)           |                    |
| 91 to 180 days  | VTE             | 28 (0.14) | < 5                  |                    |              | 5 (0.09)   | < 5                | 59 (1.36)          | < 5                |                    |
|                 | DVT             | 12 (0.06) | < 5                  |                    |              | < 5        | < 5                | 32 (0.74)          | < 5                |                    |
|                 | PE              | 16 (0.08) | < 5                  |                    |              | < 5        | < 5                | 30 (0.69)          | < 5                |                    |

| Cohort        | Time window     | Outcome         | AURUM        |            | CORIVA               |                   | GOLD         |            | SIDIAP             |                   |                    |                    |
|---------------|-----------------|-----------------|--------------|------------|----------------------|-------------------|--------------|------------|--------------------|-------------------|--------------------|--------------------|
|               |                 |                 | Unvaccinated | Vaccinated | Unvaccinated         | Vaccinated        | Unvaccinated | Vaccinated | Unvaccinated       | Vaccinated        |                    |                    |
|               |                 | ATE             | 14 (0.07)    | 5 (0.08)   |                      |                   | < 5          | < 5        | 90 (2.08)          | 10 (0.22)         |                    |                    |
|               |                 | IS              | < 5          | < 5        |                      |                   | < 5          | < 5        | 49 (1.13)          | 5 (0.11)          |                    |                    |
|               |                 | TIA             | 7 (0.04)     | < 5        |                      |                   | < 5          | < 5        | 21 (0.48)          | < 5               |                    |                    |
|               |                 | MI              | 8 (0.04)     | < 5        |                      |                   | < 5          | < 5        | 23 (0.53)          | < 5               |                    |                    |
|               |                 | HF              | 19 (0.10)    | 9 (0.15)   |                      |                   | < 5          | < 5        | 110 (2.54)         | 25 (0.56)         |                    |                    |
|               |                 | HS              | < 5          | < 5        |                      |                   | < 5          | < 5        | 7 (0.16)           | < 5               |                    |                    |
|               |                 | MP              | < 5          | < 5        |                      |                   | < 5          | < 5        | 7 (0.16)           | < 5               |                    |                    |
|               | 181 to 365 days | VTE             | 10 (0.05)    | 7 (0.12)   |                      |                   | < 5          | < 5        | 16 (0.37)          | 10 (0.22)         |                    |                    |
|               |                 | DVT             | < 5          | < 5        |                      |                   | < 5          | < 5        | 10 (0.23)          | 6 (0.13)          |                    |                    |
|               |                 | PE              | 8 (0.04)     | 5 (0.08)   |                      |                   | < 5          | < 5        | 8 (0.18)           | < 5               |                    |                    |
|               |                 | ATE             | 12 (0.06)    | 6 (0.10)   |                      |                   | < 5          | < 5        | 59 (1.36)          | 19 (0.43)         |                    |                    |
|               |                 | IS              | < 5          | < 5        |                      |                   | < 5          | < 5        | 29 (0.67)          | 9 (0.20)          |                    |                    |
|               |                 | TIA             | < 5          | < 5        |                      |                   | < 5          | < 5        | 18 (0.42)          | 5 (0.11)          |                    |                    |
|               |                 | MI              | 9 (0.05)     | < 5        |                      |                   | < 5          | < 5        | 14 (0.32)          | 5 (0.11)          |                    |                    |
|               |                 | HF              | 23 (0.12)    | 11 (0.19)  |                      |                   | < 5          | < 5        | 73 (1.69)          | 27 (0.61)         |                    |                    |
|               |                 | HS              | < 5          | < 5        |                      |                   | < 5          | < 5        | 6 (0.14)           | < 5               |                    |                    |
|               |                 | MP              | < 5          | < 5        |                      |                   | < 5          | < 5        | < 5                | < 5               |                    |                    |
|               |                 | <b>Cohort 3</b> |              |            | <b>N = 1,510,323</b> | <b>N = 54,102</b> |              |            | <b>N = 416,549</b> | <b>N = 36,748</b> | <b>N = 869,109</b> | <b>N = 706,435</b> |
|               |                 | 0 to 30 days    | VTE          | 244 (1.62) | < 5                  |                   |              | 28 (0.67)  | < 5                | 321 (3.69)        | < 5                |                    |
|               |                 |                 | DVT          | 44 (0.29)  | < 5                  |                   |              | 6 (0.14)   | < 5                | 89 (1.02)         | < 5                |                    |
| PE            | 209 (1.38)      |                 | < 5          |            |                      | 23 (0.55)         | < 5          | 259 (2.98) | < 5                |                   |                    |                    |
| ATE           | 29 (0.19)       |                 | < 5          |            |                      | < 5               | < 5          | 211 (2.43) | < 5                |                   |                    |                    |
| IS            | < 5             |                 | < 5          |            |                      | < 5               | < 5          | 102 (1.17) | < 5                |                   |                    |                    |
| TIA           | 5 (0.03)        |                 | < 5          |            |                      | < 5               | < 5          | 20 (0.23)  | < 5                |                   |                    |                    |
| MI            | 20 (0.13)       |                 | < 5          |            |                      | < 5               | < 5          | 95 (1.09)  | < 5                |                   |                    |                    |
| HF            | 30 (0.20)       |                 | 7 (1.29)     |            |                      | < 5               | < 5          | 366 (4.21) | 5 (0.07)           |                   |                    |                    |
| HS            | < 5             |                 | < 5          |            |                      | < 5               | < 5          | 20 (0.23)  | < 5                |                   |                    |                    |
| MP            | 9 (0.06)        |                 | < 5          |            |                      | < 5               | < 5          | 19 (0.22)  | < 5                |                   |                    |                    |
| 31 to 90 days | VTE             |                 | 44 (0.29)    | < 5        |                      |                   | < 5          | < 5        | 84 (0.97)          | < 5               |                    |                    |
|               | DVT             |                 | 20 (0.13)    | < 5        |                      |                   | < 5          | < 5        | 56 (0.64)          | < 5               |                    |                    |
|               | PE              |                 | 27 (0.18)    | < 5        |                      |                   | < 5          | < 5        | 38 (0.44)          | < 5               |                    |                    |
|               | ATE             | 11 (0.07)       | < 5          |            |                      | < 5               | < 5          | 107 (1.23) | < 5                |                   |                    |                    |
|               | IS              | < 5             | < 5          |            |                      | < 5               | < 5          | 53 (0.61)  | < 5                |                   |                    |                    |
|               | TIA             | < 5             | < 5          |            |                      | < 5               | < 5          | 27 (0.31)  | < 5                |                   |                    |                    |

| Cohort          | Time window     | Outcome    | AURUM        |                      | CORIVA               |                    | GOLD              |                    | SIDIAP             |                      |                    |
|-----------------|-----------------|------------|--------------|----------------------|----------------------|--------------------|-------------------|--------------------|--------------------|----------------------|--------------------|
|                 |                 |            | Unvaccinated | Vaccinated           | Unvaccinated         | Vaccinated         | Unvaccinated      | Vaccinated         | Unvaccinated       | Vaccinated           |                    |
|                 | 91 to 180 days  | MI         | 9 (0.06)     | < 5                  |                      |                    | < 5               | < 5                | 35 (0.40)          | < 5                  |                    |
|                 |                 | HF         | 15 (0.10)    | < 5                  |                      |                    | < 5               | < 5                | 139 (1.60)         | < 5                  |                    |
|                 |                 | HS         | < 5          | < 5                  |                      |                    | < 5               | < 5                | 7 (0.08)           | < 5                  |                    |
|                 |                 | MP         | 8 (0.05)     | < 5                  |                      |                    | < 5               | < 5                | 8 (0.09)           | < 5                  |                    |
|                 |                 | VTE        | 24 (0.16)    | < 5                  |                      |                    | < 5               | < 5                | 63 (0.72)          | < 5                  |                    |
|                 |                 | DVT        | 11 (0.07)    | < 5                  |                      |                    | < 5               | < 5                | 35 (0.40)          | < 5                  |                    |
|                 |                 | PE         | 14 (0.09)    | < 5                  |                      |                    | < 5               | < 5                | 32 (0.37)          | < 5                  |                    |
|                 |                 | ATE        | < 5          | < 5                  |                      |                    | < 5               | < 5                | 112 (1.29)         | 6 (0.08)             |                    |
|                 |                 | IS         | < 5          | < 5                  |                      |                    | < 5               | < 5                | 57 (0.66)          | < 5                  |                    |
|                 |                 | TIA        | < 5          | < 5                  |                      |                    | < 5               | < 5                | 22 (0.25)          | < 5                  |                    |
|                 |                 | MI         | < 5          | < 5                  |                      |                    | < 5               | < 5                | 36 (0.41)          | < 5                  |                    |
|                 |                 | HF         | 10 (0.07)    | < 5                  |                      |                    | < 5               | < 5                | 121 (1.39)         | < 5                  |                    |
|                 | HS              | < 5        | < 5          |                      |                      | < 5                | < 5               | 9 (0.10)           | < 5                |                      |                    |
|                 | MP              | < 5        | < 5          |                      |                      | < 5                | < 5               | 7 (0.08)           | < 5                |                      |                    |
|                 | 181 to 365 days | VTE        | < 5          | < 5                  |                      |                    | < 5               | < 5                | 36 (0.41)          | < 5                  |                    |
|                 |                 | DVT        | < 5          | < 5                  |                      |                    | < 5               | < 5                | 22 (0.25)          | < 5                  |                    |
|                 |                 | PE         | < 5          | < 5                  |                      |                    | < 5               | < 5                | 16 (0.18)          | < 5                  |                    |
|                 |                 | ATE        | < 5          | < 5                  |                      |                    | < 5               | < 5                | 48 (0.55)          | 6 (0.08)             |                    |
|                 |                 | IS         | < 5          | < 5                  |                      |                    | < 5               | < 5                | 23 (0.26)          | < 5                  |                    |
|                 |                 | TIA        | < 5          | < 5                  |                      |                    | < 5               | < 5                | 9 (0.10)           | < 5                  |                    |
|                 |                 | MI         | < 5          | < 5                  |                      |                    | < 5               | < 5                | 17 (0.20)          | < 5                  |                    |
|                 |                 | HF         | 5 (0.03)     | < 5                  |                      |                    | < 5               | < 5                | 61 (0.70)          | < 5                  |                    |
|                 |                 | HS         | < 5          | < 5                  |                      |                    | < 5               | < 5                | < 5                | < 5                  |                    |
|                 |                 | MP         | < 5          | < 5                  |                      |                    | < 5               | < 5                | < 5                | < 5                  |                    |
| <b>Cohort 4</b> |                 |            |              | <b>N = 2,014,161</b> | <b>N = 1,335,671</b> | <b>N = 147,553</b> | <b>N = 15,683</b> | <b>N = 465,326</b> | <b>N = 365,096</b> | <b>N = 1,068,043</b> | <b>N = 580,329</b> |
| 0 to 30 days    |                 | VTE        | 328 (1.63)   | 9 (0.07)             | 116 (7.86)           | < 5                | 36 (0.77)         | < 5                | 350 (3.28)         | 18 (0.31)            |                    |
|                 | DVT             | 52 (0.26)  | 5 (0.04)     | 22 (1.49)            | < 5                  | 6 (0.13)           | < 5               | 107 (1.00)         | 8 (0.14)           |                      |                    |
|                 | PE              | 287 (1.42) | < 5          | 97 (6.57)            | < 5                  | 31 (0.67)          | < 5               | 271 (2.54)         | 10 (0.17)          |                      |                    |
|                 | ATE             | 25 (0.12)  | < 5          | 116 (7.86)           | < 5                  | < 5                | < 5               | 233 (2.18)         | 9 (0.16)           |                      |                    |
|                 | IS              | < 5        | < 5          | 69 (4.68)            | < 5                  | < 5                | < 5               | 114 (1.07)         | 6 (0.10)           |                      |                    |
|                 | TIA             | 6 (0.03)   | < 5          | 18 (1.22)            | < 5                  | < 5                | < 5               | 28 (0.26)          | < 5                |                      |                    |
|                 | MI              | 15 (0.07)  | < 5          | 38 (2.58)            | < 5                  | < 5                | < 5               | 97 (0.91)          | < 5                |                      |                    |
|                 | HF              | 26 (0.13)  | < 5          | 362 (24.53)          | 6 (3.83)             | < 5                | < 5               | 369 (3.45)         | 7 (0.12)           |                      |                    |
|                 | HS              | < 5        | < 5          | 5 (0.34)             | < 5                  | < 5                | < 5               | 24 (0.22)          | < 5                |                      |                    |

| Cohort          | Time window | Outcome   | AURUM        |             | CORIVA       |            | GOLD         |            | SIDIAP       |            |
|-----------------|-------------|-----------|--------------|-------------|--------------|------------|--------------|------------|--------------|------------|
|                 |             |           | Unvaccinated | Vaccinated  | Unvaccinated | Vaccinated | Unvaccinated | Vaccinated | Unvaccinated | Vaccinated |
| 31 to 90 days   | MP          | 13 (0.06) | < 5          | 7 (0.47)    | < 5          | < 5        | < 5          | 26 (0.24)  | < 5          |            |
|                 | VTE         | 56 (0.28) | < 5          | 54 (3.66)   | < 5          | < 5        | < 5          | 93 (0.87)  | 6 (0.10)     |            |
|                 | DVT         | 20 (0.10) | < 5          | 32 (2.17)   | < 5          | < 5        | < 5          | 62 (0.58)  | < 5          |            |
|                 | PE          | 39 (0.19) | < 5          | 26 (1.76)   | < 5          | < 5        | < 5          | 41 (0.38)  | < 5          |            |
|                 | ATE         | 13 (0.06) | < 5          | 46 (3.12)   | < 5          | < 5        | < 5          | 115 (1.08) | < 5          |            |
|                 | IS          | < 5       | < 5          | 24 (1.63)   | < 5          | < 5        | < 5          | 51 (0.48)  | < 5          |            |
|                 | TIA         | < 5       | < 5          | 6 (0.41)    | < 5          | < 5        | < 5          | 31 (0.29)  | < 5          |            |
|                 | MI          | 9 (0.04)  | < 5          | 19 (1.29)   | < 5          | < 5        | < 5          | 41 (0.38)  | < 5          |            |
|                 | HF          | 14 (0.07) | 6 (0.04)     | 174 (11.79) | < 5          | < 5        | < 5          | 143 (1.34) | < 5          |            |
|                 | HS          | < 5       | < 5          | < 5         | < 5          | < 5        | < 5          | 10 (0.09)  | < 5          |            |
| 91 to 180 days  | MP          | 7 (0.03)  | < 5          | 5 (0.34)    | < 5          | < 5        | < 5          | 12 (0.11)  | < 5          |            |
|                 | VTE         | 24 (0.12) | 8 (0.06)     | 49 (3.32)   | < 5          | < 5        | < 5          | 77 (0.72)  | < 5          |            |
|                 | DVT         | 11 (0.05) | 7 (0.05)     | 31 (2.10)   | < 5          | < 5        | < 5          | 42 (0.39)  | < 5          |            |
|                 | PE          | 14 (0.07) | < 5          | 19 (1.29)   | < 5          | < 5        | < 5          | 38 (0.36)  | < 5          |            |
|                 | ATE         | < 5       | < 5          | 41 (2.78)   | < 5          | < 5        | < 5          | 134 (1.25) | 9 (0.16)     |            |
|                 | IS          | < 5       | < 5          | 19 (1.29)   | < 5          | < 5        | < 5          | 66 (0.62)  | 7 (0.12)     |            |
|                 | TIA         | < 5       | < 5          | 12 (0.81)   | < 5          | < 5        | < 5          | 31 (0.29)  | < 5          |            |
|                 | MI          | < 5       | < 5          | 14 (0.95)   | < 5          | < 5        | < 5          | 40 (0.37)  | < 5          |            |
|                 | HF          | 9 (0.04)  | < 5          | 208 (14.10) | < 5          | < 5        | < 5          | 145 (1.36) | 9 (0.16)     |            |
|                 | HS          | < 5       | < 5          | < 5         | < 5          | < 5        | < 5          | 15 (0.14)  | < 5          |            |
| 181 to 365 days | MP          | < 5       | < 5          | 5 (0.34)    | < 5          | < 5        | < 5          | 13 (0.12)  | < 5          |            |
|                 | VTE         | < 5       | < 5          | 77 (5.22)   | 5 (3.19)     | < 5        | < 5          | 52 (0.49)  | 7 (0.12)     |            |
|                 | DVT         | < 5       | < 5          | 46 (3.12)   | < 5          | < 5        | < 5          | 36 (0.34)  | 5 (0.09)     |            |
|                 | PE          | < 5       | < 5          | 35 (2.37)   | < 5          | < 5        | < 5          | 18 (0.17)  | < 5          |            |
|                 | ATE         | < 5       | < 5          | 72 (4.88)   | < 5          | < 5        | < 5          | 52 (0.49)  | 15 (0.26)    |            |
|                 | IS          | < 5       | < 5          | 33 (2.24)   | < 5          | < 5        | < 5          | 28 (0.26)  | 10 (0.17)    |            |
|                 | TIA         | < 5       | < 5          | 18 (1.22)   | < 5          | < 5        | < 5          | 10 (0.09)  | < 5          |            |
|                 | MI          | < 5       | < 5          | 27 (1.83)   | < 5          | < 5        | < 5          | 15 (0.14)  | 5 (0.09)     |            |
|                 | HF          | < 5       | < 5          | 298 (20.20) | < 5          | < 5        | < 5          | 58 (0.54)  | < 5          |            |
|                 | HS          | < 5       | < 5          | 8 (0.54)    | < 5          | < 5        | < 5          | 5 (0.05)   | < 5          |            |
| MP              | < 5         | < 5       | 5 (0.34)     | < 5         | < 5          | < 5        | 6 (0.06)     | < 5        |              |            |

VTE = Venous thromboembolism (DVT + PE), DVT = Deep vein thrombosis, PE = Pulmonary embolism, ATE = Arterial thrombosis/thromboembolism (IS + TIA + MI), IS = Ischemic stroke, TIA = Transient ischemic attack, MI = Myocardial infarction, HF = Heart failure, HS = Hemorrhagic stroke, MP = Myocarditis or Pericarditis

**Table S33: Number of records (and risk per 10,000 individuals) for post COVID-19 cardiac and thromboembolic complications, across cohorts and databases, stratified by exposure status (BNT162b2 vaccine). Only first outcome after COVID-19 captured.**

| Cohort          | Time window | Outcome    | AURUM              |                    | CORIVA            |                   | GOLD               |                   | SIDIAP             |                   |
|-----------------|-------------|------------|--------------------|--------------------|-------------------|-------------------|--------------------|-------------------|--------------------|-------------------|
|                 |             |            | Unvaccinated       | Vaccinated         | Unvaccinated      | Vaccinated        | Unvaccinated       | Vaccinated        | Unvaccinated       | Vaccinated        |
| <b>Cohort 1</b> |             |            | <b>N = 348,052</b> | <b>N = 332,790</b> | <b>N = 24,073</b> | <b>N = 19,686</b> | <b>N = 169,459</b> | <b>N = 32,755</b> | <b>N = 223,960</b> | <b>N = 88,896</b> |
| 0 to 30 days    | VTE         | 106 (3.05) | 76 (2.28)          | 76 (31.57)         | 40 (20.32)        | 8 (0.47)          | < 5                | 75 (3.35)         | 94 (10.57)         |                   |
|                 | DVT         | 21 (0.60)  | 15 (0.45)          | 14 (5.82)          | 13 (6.60)         | < 5               | < 5                | 20 (0.89)         | 29 (3.26)          |                   |
|                 | PE          | 90 (2.59)  | 64 (1.92)          | 64 (26.59)         | 28 (14.22)        | 6 (0.35)          | < 5                | 60 (2.68)         | 75 (8.44)          |                   |
|                 | ATE         | 27 (0.78)  | 45 (1.35)          | 114 (47.36)        | 61 (30.99)        | 6 (0.35)          | < 5                | 79 (3.53)         | 206 (23.17)        |                   |
|                 | IS          | 9 (0.26)   | 5 (0.15)           | 68 (28.25)         | 26 (13.21)        | < 5               | < 5                | 46 (2.05)         | 116 (13.05)        |                   |
|                 | TIA         | 5 (0.14)   | 11 (0.33)          | 22 (9.14)          | 15 (7.62)         | < 5               | < 5                | 7 (0.31)          | 41 (4.61)          |                   |
|                 | MI          | 14 (0.40)  | 29 (0.87)          | 34 (14.12)         | 27 (13.72)        | < 5               | < 5                | 28 (1.25)         | 61 (6.86)          |                   |
|                 | HF          | 59 (1.70)  | 126 (3.79)         | 393 (163.25)       | 231 (117.34)      | 9 (0.53)          | < 5                | 299 (13.35)       | 634 (71.32)        |                   |
|                 | HS          | < 5        | < 5                | < 5                | < 5               | < 5               | < 5                | 7 (0.31)          | 14 (1.57)          |                   |
|                 | MP          | < 5        | < 5                | < 5                | < 5               | < 5               | < 5                | < 5               | < 5                |                   |
| 31 to 90 days   | VTE         | 18 (0.52)  | 25 (0.75)          | 37 (15.37)         | 23 (11.68)        | < 5               | < 5                | 15 (0.67)         | 43 (4.84)          |                   |
|                 | DVT         | 9 (0.26)   | 7 (0.21)           | 18 (7.48)          | 13 (6.60)         | < 5               | < 5                | 9 (0.40)          | 28 (3.15)          |                   |
|                 | PE          | 9 (0.26)   | 18 (0.54)          | 22 (9.14)          | 10 (5.08)         | < 5               | < 5                | 6 (0.27)          | 19 (2.14)          |                   |
|                 | ATE         | 9 (0.26)   | 23 (0.69)          | 27 (11.22)         | 33 (16.76)        | < 5               | < 5                | 39 (1.74)         | 125 (14.06)        |                   |
|                 | IS          | < 5        | < 5                | 15 (6.23)          | 13 (6.60)         | < 5               | < 5                | 20 (0.89)         | 69 (7.76)          |                   |
|                 | TIA         | 5 (0.14)   | 10 (0.30)          | 7 (2.91)           | 14 (7.11)         | < 5               | < 5                | 13 (0.58)         | 32 (3.60)          |                   |
|                 | MI          | 5 (0.14)   | 11 (0.33)          | 9 (3.74)           | 8 (4.06)          | < 5               | < 5                | 9 (0.40)          | 28 (3.15)          |                   |
|                 | HF          | 32 (0.92)  | 70 (2.10)          | 136 (56.49)        | 135 (68.58)       | < 5               | < 5                | 83 (3.71)         | 288 (32.40)        |                   |
|                 | HS          | < 5        | < 5                | < 5                | < 5               | < 5               | < 5                | < 5               | 12 (1.35)          |                   |
|                 | MP          | < 5        | < 5                | < 5                | < 5               | < 5               | < 5                | < 5               | < 5                |                   |
| 91 to 180 days  | VTE         | 10 (0.29)  | < 5                | 14 (5.82)          | 22 (11.18)        | < 5               | < 5                | 19 (0.85)         | 35 (3.94)          |                   |
|                 | DVT         | < 5        | < 5                | 6 (2.49)           | 11 (5.59)         | < 5               | < 5                | 7 (0.31)          | 19 (2.14)          |                   |
|                 | PE          | 6 (0.17)   | < 5                | 9 (3.74)           | 12 (6.10)         | < 5               | < 5                | 12 (0.54)         | 18 (2.02)          |                   |
|                 | ATE         | 15 (0.43)  | 18 (0.54)          | 29 (12.05)         | 35 (17.78)        | < 5               | < 5                | 26 (1.16)         | 102 (11.47)        |                   |
|                 | IS          | < 5        | 6 (0.18)           | 14 (5.82)          | 14 (7.11)         | < 5               | < 5                | 14 (0.63)         | 56 (6.30)          |                   |
|                 | TIA         | 8 (0.23)   | 6 (0.18)           | 8 (3.32)           | 10 (5.08)         | < 5               | < 5                | 7 (0.31)          | 33 (3.71)          |                   |
|                 | MI          | 5 (0.14)   | 6 (0.18)           | 8 (3.32)           | 15 (7.62)         | < 5               | < 5                | 6 (0.27)          | 22 (2.47)          |                   |
|                 | HF          | 40 (1.15)  | 54 (1.62)          | 147 (61.06)        | 159 (80.77)       | < 5               | < 5                | 81 (3.62)         | 226 (25.42)        |                   |
|                 | HS          | < 5        | < 5                | < 5                | < 5               | < 5               | < 5                | < 5               | < 5                |                   |
|                 | MP          | < 5        | < 5                | < 5                | < 5               | < 5               | < 5                | < 5               | < 5                |                   |



| Cohort          | Time window | Outcome | AURUM                |                    | CORIVA       |              | GOLD               |                    | SIDIAP             |                    |
|-----------------|-------------|---------|----------------------|--------------------|--------------|--------------|--------------------|--------------------|--------------------|--------------------|
|                 |             |         | Unvaccinated         | Vaccinated         | Unvaccinated | Vaccinated   | Unvaccinated       | Vaccinated         | Unvaccinated       | Vaccinated         |
| 181 to 365 days | VTE         | VTE     | 11 (0.32)            | 10 (0.30)          | 27 (11.22)   | 24 (12.19)   | < 5                | < 5                | 5 (0.22)           | 10 (1.12)          |
|                 |             | DVT     | < 5                  | 6 (0.18)           | 10 (4.15)    | 14 (7.11)    | < 5                | < 5                | < 5                | 7 (0.79)           |
|                 |             | PE      | 9 (0.26)             | < 5                | 21 (8.72)    | 11 (5.59)    | < 5                | < 5                | < 5                | < 5                |
|                 |             | ATE     | 14 (0.40)            | 14 (0.42)          | 47 (19.52)   | 58 (29.46)   | < 5                | < 5                | 34 (1.52)          | 38 (4.27)          |
|                 |             | IS      | < 5                  | < 5                | 26 (10.80)   | 27 (13.72)   | < 5                | < 5                | 17 (0.76)          | 23 (2.59)          |
|                 |             | TIA     | 9 (0.26)             | < 5                | 15 (6.23)    | 24 (12.19)   | < 5                | < 5                | 10 (0.45)          | 9 (1.01)           |
|                 |             | MI      | < 5                  | 7 (0.21)           | 10 (4.15)    | 12 (6.10)    | < 5                | < 5                | 7 (0.31)           | 7 (0.79)           |
|                 |             | HF      | 47 (1.35)            | 35 (1.05)          | 226 (93.88)  | 223 (113.28) | < 5                | < 5                | 70 (3.13)          | 117 (13.16)        |
|                 |             | HS      | < 5                  | < 5                | < 5          | < 5          | < 5                | < 5                | < 5                | 7 (0.79)           |
|                 |             | MP      | < 5                  | < 5                | < 5          | < 5          | < 5                | < 5                | < 5                | < 5                |
| <b>Cohort 2</b> |             |         | <b>N = 1,976,163</b> | <b>N = 594,262</b> |              |              | <b>N = 584,309</b> | <b>N = 180,670</b> | <b>N = 433,111</b> | <b>N = 445,581</b> |
| 0 to 30 days    | VTE         | VTE     | 240 (1.21)           | 62 (1.04)          |              |              | 29 (0.50)          | 5 (0.28)           | 259 (5.98)         | 265 (5.95)         |
|                 |             | DVT     | 39 (0.20)            | 18 (0.30)          |              |              | 7 (0.12)           | < 5                | 63 (1.45)          | 96 (2.15)          |
|                 |             | PE      | 205 (1.04)           | 45 (0.76)          |              |              | 23 (0.39)          | < 5                | 215 (4.96)         | 189 (4.24)         |
|                 |             | ATE     | 39 (0.20)            | 29 (0.49)          |              |              | < 5                | < 5                | 172 (3.97)         | 489 (10.97)        |
|                 |             | IS      | 7 (0.04)             | < 5                |              |              | < 5                | < 5                | 94 (2.17)          | 267 (5.99)         |
|                 |             | TIA     | 6 (0.03)             | 11 (0.19)          |              |              | < 5                | < 5                | 17 (0.39)          | 90 (2.02)          |
|                 |             | MI      | 26 (0.13)            | 16 (0.27)          |              |              | < 5                | < 5                | 65 (1.50)          | 163 (3.66)         |
|                 |             | HF      | 50 (0.25)            | 43 (0.72)          |              |              | 6 (0.10)           | < 5                | 380 (8.77)         | 1,137 (25.52)      |
|                 |             | HS      | 6 (0.03)             | < 5                |              |              | < 5                | < 5                | 18 (0.42)          | 61 (1.37)          |
|                 |             | MP      | 11 (0.06)            | < 5                |              |              | < 5                | < 5                | 14 (0.32)          | 22 (0.49)          |
| 31 to 90 days   | VTE         | VTE     | 46 (0.23)            | 21 (0.35)          |              |              | < 5                | < 5                | 57 (1.32)          | 123 (2.76)         |
|                 |             | DVT     | 25 (0.13)            | 7 (0.12)           |              |              | < 5                | < 5                | 31 (0.72)          | 77 (1.73)          |
|                 |             | PE      | 24 (0.12)            | 14 (0.24)          |              |              | < 5                | < 5                | 32 (0.74)          | 55 (1.23)          |
|                 |             | ATE     | 17 (0.09)            | 36 (0.61)          |              |              | < 5                | < 5                | 84 (1.94)          | 307 (6.89)         |
|                 |             | IS      | < 5                  | 5 (0.08)           |              |              | < 5                | < 5                | 43 (0.99)          | 162 (3.64)         |
|                 |             | TIA     | < 5                  | 9 (0.15)           |              |              | < 5                | < 5                | 24 (0.55)          | 85 (1.91)          |
|                 |             | MI      | 11 (0.06)            | 22 (0.37)          |              |              | < 5                | < 5                | 24 (0.55)          | 79 (1.77)          |
|                 |             | HF      | 27 (0.14)            | 34 (0.57)          |              |              | < 5                | < 5                | 131 (3.02)         | 534 (11.98)        |
|                 |             | HS      | < 5                  | < 5                |              |              | < 5                | < 5                | 7 (0.16)           | 19 (0.43)          |
|                 |             | MP      | 6 (0.03)             | < 5                |              |              | < 5                | < 5                | < 5                | < 5                |
| 91 to 180 days  | VTE         | VTE     | 25 (0.13)            | 9 (0.15)           |              |              | 5 (0.09)           | < 5                | 53 (1.22)          | 84 (1.89)          |
|                 |             | DVT     | 11 (0.06)            | 6 (0.10)           |              |              | < 5                | < 5                | 29 (0.67)          | 52 (1.17)          |
|                 |             | PE      | 14 (0.07)            | < 5                |              |              | < 5                | < 5                | 27 (0.62)          | 39 (0.88)          |

| Cohort          | Time window            | Outcome    | AURUM                |                   | CORIVA       |            | GOLD               |                   | SIDAP              |                    |
|-----------------|------------------------|------------|----------------------|-------------------|--------------|------------|--------------------|-------------------|--------------------|--------------------|
|                 |                        |            | Unvaccinated         | Vaccinated        | Unvaccinated | Vaccinated | Unvaccinated       | Vaccinated        | Unvaccinated       | Vaccinated         |
|                 |                        | <b>ATE</b> | 13 (0.07)            | 15 (0.25)         |              |            | < 5                | < 5               | 80 (1.85)          | 265 (5.95)         |
|                 |                        | <b>IS</b>  | < 5                  | < 5               |              |            | < 5                | < 5               | 43 (0.99)          | 148 (3.32)         |
|                 |                        | <b>TIA</b> | 7 (0.04)             | 5 (0.08)          |              |            | < 5                | < 5               | 19 (0.44)          | 72 (1.62)          |
|                 |                        | <b>MI</b>  | 7 (0.04)             | 10 (0.17)         |              |            | < 5                | < 5               | 21 (0.48)          | 62 (1.39)          |
|                 |                        | <b>HF</b>  | 19 (0.10)            | 24 (0.40)         |              |            | < 5                | < 5               | 101 (2.33)         | 438 (9.83)         |
|                 |                        | <b>HS</b>  | < 5                  | < 5               |              |            | < 5                | < 5               | 7 (0.16)           | 33 (0.74)          |
|                 |                        | <b>MP</b>  | < 5                  | < 5               |              |            | < 5                | < 5               | 7 (0.16)           | < 5                |
|                 | <b>181 to 365 days</b> | <b>VTE</b> | 9 (0.05)             | 8 (0.13)          |              |            | < 5                | < 5               | 15 (0.35)          | 30 (0.67)          |
|                 |                        | <b>DVT</b> | < 5                  | < 5               |              |            | < 5                | < 5               | 9 (0.21)           | 20 (0.45)          |
|                 |                        | <b>PE</b>  | 7 (0.04)             | 7 (0.12)          |              |            | < 5                | < 5               | 8 (0.18)           | 12 (0.27)          |
|                 |                        | <b>ATE</b> | 9 (0.05)             | 7 (0.12)          |              |            | < 5                | < 5               | 50 (1.15)          | 103 (2.31)         |
|                 |                        | <b>IS</b>  | < 5                  | < 5               |              |            | < 5                | < 5               | 25 (0.58)          | 51 (1.14)          |
|                 |                        | <b>TIA</b> | < 5                  | < 5               |              |            | < 5                | < 5               | 16 (0.37)          | 29 (0.65)          |
|                 |                        | <b>MI</b>  | 7 (0.04)             | < 5               |              |            | < 5                | < 5               | 11 (0.25)          | 29 (0.65)          |
|                 |                        | <b>HF</b>  | 22 (0.11)            | 12 (0.20)         |              |            | < 5                | < 5               | 63 (1.45)          | 178 (3.99)         |
|                 |                        | <b>HS</b>  | < 5                  | < 5               |              |            | < 5                | < 5               | 5 (0.12)           | 9 (0.20)           |
|                 |                        | <b>MP</b>  | < 5                  | < 5               |              |            | < 5                | < 5               | < 5                | < 5                |
| <b>Cohort 3</b> |                        |            | <b>N = 1,510,323</b> | <b>N = 54,102</b> |              |            | <b>N = 416,549</b> | <b>N = 36,748</b> | <b>N = 869,109</b> | <b>N = 706,435</b> |
|                 | <b>0 to 30 days</b>    | <b>VTE</b> | 244 (1.62)           | < 5               |              |            | 28 (0.67)          | < 5               | 321 (3.69)         | 114 (1.61)         |
|                 |                        | <b>DVT</b> | 44 (0.29)            | < 5               |              |            | 6 (0.14)           | < 5               | 89 (1.02)          | 51 (0.72)          |
|                 |                        | <b>PE</b>  | 209 (1.38)           | < 5               |              |            | 23 (0.55)          | < 5               | 259 (2.98)         | 71 (1.01)          |
|                 |                        | <b>ATE</b> | 29 (0.19)            | < 5               |              |            | < 5                | < 5               | 211 (2.43)         | 197 (2.79)         |
|                 |                        | <b>IS</b>  | < 5                  | < 5               |              |            | < 5                | < 5               | 102 (1.17)         | 95 (1.34)          |
|                 |                        | <b>TIA</b> | 5 (0.03)             | < 5               |              |            | < 5                | < 5               | 20 (0.23)          | 42 (0.59)          |
|                 |                        | <b>MI</b>  | 20 (0.13)            | < 5               |              |            | < 5                | < 5               | 95 (1.09)          | 78 (1.10)          |
|                 |                        | <b>HF</b>  | 30 (0.20)            | 10 (1.85)         |              |            | < 5                | < 5               | 366 (4.21)         | 163 (2.31)         |
|                 |                        | <b>HS</b>  | < 5                  | < 5               |              |            | < 5                | < 5               | 20 (0.23)          | 26 (0.37)          |
|                 |                        | <b>MP</b>  | 9 (0.06)             | < 5               |              |            | < 5                | < 5               | 19 (0.22)          | 13 (0.18)          |
|                 | <b>31 to 90 days</b>   | <b>VTE</b> | 41 (0.27)            | < 5               |              |            | < 5                | < 5               | 80 (0.92)          | 63 (0.89)          |
|                 |                        | <b>DVT</b> | 19 (0.13)            | < 5               |              |            | < 5                | < 5               | 53 (0.61)          | 47 (0.67)          |
|                 |                        | <b>PE</b>  | 25 (0.17)            | < 5               |              |            | < 5                | < 5               | 36 (0.41)          | 21 (0.30)          |
|                 |                        | <b>ATE</b> | 11 (0.07)            | < 5               |              |            | < 5                | < 5               | 106 (1.22)         | 142 (2.01)         |
|                 |                        | <b>IS</b>  | < 5                  | < 5               |              |            | < 5                | < 5               | 53 (0.61)          | 54 (0.76)          |
|                 |                        | <b>TIA</b> | < 5                  | < 5               |              |            | < 5                | < 5               | 27 (0.31)          | 27 (0.38)          |

| Cohort          | Time window     | Outcome    | AURUM                |                      | CORIVA             |                   | GOLD               |                    | SIDIAP               |                    |
|-----------------|-----------------|------------|----------------------|----------------------|--------------------|-------------------|--------------------|--------------------|----------------------|--------------------|
|                 |                 |            | Unvaccinated         | Vaccinated           | Unvaccinated       | Vaccinated        | Unvaccinated       | Vaccinated         | Unvaccinated         | Vaccinated         |
|                 | 91 to 180 days  | MI         | 9 (0.06)             | < 5                  |                    |                   | < 5                | < 5                | 34 (0.39)            | 69 (0.98)          |
|                 |                 | HF         | 15 (0.10)            | < 5                  |                    |                   | < 5                | < 5                | 132 (1.52)           | 108 (1.53)         |
|                 |                 | HS         | < 5                  | < 5                  |                    |                   | < 5                | < 5                | 7 (0.08)             | 14 (0.20)          |
|                 |                 | MP         | 8 (0.05)             | < 5                  |                    |                   | < 5                | < 5                | 8 (0.09)             | 9 (0.13)           |
|                 |                 | VTE        | 23 (0.15)            | < 5                  |                    |                   | < 5                | < 5                | 56 (0.64)            | 67 (0.95)          |
|                 |                 | DVT        | 10 (0.07)            | < 5                  |                    |                   | < 5                | < 5                | 32 (0.37)            | 43 (0.61)          |
|                 |                 | PE         | 14 (0.09)            | < 5                  |                    |                   | < 5                | < 5                | 28 (0.32)            | 25 (0.35)          |
|                 |                 | ATE        | < 5                  | < 5                  |                    |                   | < 5                | < 5                | 101 (1.16)           | 137 (1.94)         |
|                 |                 | IS         | < 5                  | < 5                  |                    |                   | < 5                | < 5                | 49 (0.56)            | 62 (0.88)          |
|                 |                 | TIA        | < 5                  | < 5                  |                    |                   | < 5                | < 5                | 20 (0.23)            | 28 (0.40)          |
|                 |                 | MI         | < 5                  | < 5                  |                    |                   | < 5                | < 5                | 34 (0.39)            | 53 (0.75)          |
|                 |                 | HF         | 10 (0.07)            | < 5                  |                    |                   | < 5                | < 5                | 110 (1.27)           | 97 (1.37)          |
|                 |                 | HS         | < 5                  | < 5                  |                    |                   | < 5                | < 5                | 9 (0.10)             | 10 (0.14)          |
|                 |                 | MP         | < 5                  | < 5                  |                    |                   | < 5                | < 5                | 7 (0.08)             | 9 (0.13)           |
|                 | 181 to 365 days | VTE        | < 5                  | < 5                  |                    |                   | < 5                | < 5                | 33 (0.38)            | 13 (0.18)          |
|                 | DVT             | < 5        | < 5                  |                      |                    | < 5               | < 5                | 20 (0.23)          | 11 (0.16)            |                    |
|                 | PE              | < 5        | < 5                  |                      |                    | < 5               | < 5                | 15 (0.17)          | < 5                  |                    |
|                 | ATE             | < 5        | < 5                  |                      |                    | < 5               | < 5                | 39 (0.45)          | 36 (0.51)            |                    |
|                 | IS              | < 5        | < 5                  |                      |                    | < 5               | < 5                | 18 (0.21)          | 13 (0.18)            |                    |
|                 | TIA             | < 5        | < 5                  |                      |                    | < 5               | < 5                | 8 (0.09)           | 5 (0.07)             |                    |
|                 | MI              | < 5        | < 5                  |                      |                    | < 5               | < 5                | 14 (0.16)          | 21 (0.30)            |                    |
|                 | HF              | 5 (0.03)   | < 5                  |                      |                    | < 5               | < 5                | 53 (0.61)          | 25 (0.35)            |                    |
|                 | HS              | < 5        | < 5                  |                      |                    | < 5               | < 5                | < 5                | < 5                  |                    |
|                 | MP              | < 5        | < 5                  |                      |                    | < 5               | < 5                | < 5                | < 5                  |                    |
| <b>Cohort 4</b> |                 |            | <b>N = 2,014,161</b> | <b>N = 1,335,671</b> | <b>N = 147,553</b> | <b>N = 15,683</b> | <b>N = 465,326</b> | <b>N = 365,096</b> | <b>N = 1,068,043</b> | <b>N = 580,329</b> |
| 0 to 30 days    | VTE             | 328 (1.63) | 20 (0.15)            | 116 (7.86)           | < 5                | 36 (0.77)         | < 5                | 350 (3.28)         | 66 (1.14)            |                    |
|                 | DVT             | 52 (0.26)  | 9 (0.07)             | 22 (1.49)            | < 5                | 6 (0.13)          | < 5                | 107 (1.00)         | 35 (0.60)            |                    |
|                 | PE              | 287 (1.42) | 11 (0.08)            | 97 (6.57)            | < 5                | 31 (0.67)         | < 5                | 271 (2.54)         | 35 (0.60)            |                    |
|                 | ATE             | 25 (0.12)  | < 5                  | 116 (7.86)           | < 5                | < 5               | < 5                | 233 (2.18)         | 55 (0.95)            |                    |
|                 | IS              | < 5        | < 5                  | 69 (4.68)            | < 5                | < 5               | < 5                | 114 (1.07)         | 29 (0.50)            |                    |
|                 | TIA             | 6 (0.03)   | < 5                  | 18 (1.22)            | < 5                | < 5               | < 5                | 28 (0.26)          | 7 (0.12)             |                    |
|                 | MI              | 15 (0.07)  | < 5                  | 38 (2.58)            | < 5                | < 5               | < 5                | 97 (0.91)          | 20 (0.34)            |                    |
|                 | HF              | 26 (0.13)  | < 5                  | 362 (24.53)          | 8 (5.10)           | < 5               | < 5                | 369 (3.45)         | 44 (0.76)            |                    |
|                 | HS              | < 5        | < 5                  | 5 (0.34)             | < 5                | < 5               | < 5                | 24 (0.22)          | 7 (0.12)             |                    |

| Cohort         | Time window     | Outcome | AURUM        |            | CORIVA       |            | GOLD         |            | SIDAP        |            |
|----------------|-----------------|---------|--------------|------------|--------------|------------|--------------|------------|--------------|------------|
|                |                 |         | Unvaccinated | Vaccinated | Unvaccinated | Vaccinated | Unvaccinated | Vaccinated | Unvaccinated | Vaccinated |
| 31 to 90 days  |                 | MP      | 13 (0.06)    | < 5        | 7 (0.47)     | < 5        | < 5          | < 5        | 26 (0.24)    | 11 (0.19)  |
|                |                 | VTE     | 53 (0.26)    | 7 (0.05)   | 49 (3.32)    | < 5        | < 5          | < 5        | 88 (0.82)    | 32 (0.55)  |
|                |                 | DVT     | 19 (0.09)    | < 5        | 29 (1.97)    | < 5        | < 5          | < 5        | 58 (0.54)    | 23 (0.40)  |
|                |                 | PE      | 37 (0.18)    | < 5        | 23 (1.56)    | < 5        | < 5          | < 5        | 39 (0.37)    | 10 (0.17)  |
|                |                 | ATE     | 13 (0.06)    | < 5        | 43 (2.91)    | < 5        | < 5          | < 5        | 114 (1.07)   | 51 (0.88)  |
|                |                 | IS      | < 5          | < 5        | 22 (1.49)    | < 5        | < 5          | < 5        | 51 (0.48)    | 21 (0.36)  |
|                |                 | TIA     | < 5          | < 5        | 6 (0.41)     | < 5        | < 5          | < 5        | 31 (0.29)    | 12 (0.21)  |
|                |                 | MI      | 9 (0.04)     | < 5        | 17 (1.15)    | < 5        | < 5          | < 5        | 40 (0.37)    | 21 (0.36)  |
|                |                 | HF      | 14 (0.07)    | 6 (0.04)   | 160 (10.84)  | 5 (3.19)   | < 5          | < 5        | 136 (1.27)   | 28 (0.48)  |
|                |                 | HS      | < 5          | < 5        | < 5          | < 5        | < 5          | < 5        | 10 (0.09)    | 5 (0.09)   |
|                |                 | MP      | 7 (0.03)     | < 5        | < 5          | < 5        | < 5          | < 5        | 12 (0.11)    | 8 (0.14)   |
| 91 to 180 days |                 | VTE     | 23 (0.11)    | 9 (0.07)   | 40 (2.71)    | < 5        | < 5          | < 5        | 71 (0.66)    | 40 (0.69)  |
|                |                 | DVT     | 10 (0.05)    | 7 (0.05)   | 25 (1.69)    | < 5        | < 5          | < 5        | 40 (0.37)    | 25 (0.43)  |
|                |                 | PE      | 14 (0.07)    | < 5        | 16 (1.08)    | < 5        | < 5          | < 5        | 34 (0.32)    | 18 (0.31)  |
|                |                 | ATE     | < 5          | < 5        | 38 (2.58)    | < 5        | < 5          | < 5        | 122 (1.14)   | 68 (1.17)  |
|                |                 | IS      | < 5          | < 5        | 18 (1.22)    | < 5        | < 5          | < 5        | 58 (0.54)    | 34 (0.59)  |
|                |                 | TIA     | < 5          | < 5        | 12 (0.81)    | < 5        | < 5          | < 5        | 28 (0.26)    | 14 (0.24)  |
|                |                 | MI      | < 5          | < 5        | 12 (0.81)    | < 5        | < 5          | < 5        | 38 (0.36)    | 20 (0.34)  |
|                |                 | HF      | 9 (0.04)     | < 5        | 187 (12.67)  | < 5        | < 5          | < 5        | 132 (1.24)   | 35 (0.60)  |
|                |                 | HS      | < 5          | < 5        | < 5          | < 5        | < 5          | < 5        | 14 (0.13)    | < 5        |
|                |                 | MP      | < 5          | < 5        | < 5          | < 5        | < 5          | < 5        | 13 (0.12)    | < 5        |
|                | 181 to 365 days |         | VTE          | < 5        | < 5          | 53 (3.59)  | < 5          | < 5        | < 5          | 44 (0.41)  |
|                |                 | DVT     | < 5          | < 5        | 33 (2.24)    | < 5        | < 5          | < 5        | 31 (0.29)    | 6 (0.10)   |
|                |                 | PE      | < 5          | < 5        | 23 (1.56)    | < 5        | < 5          | < 5        | 15 (0.14)    | < 5        |
|                |                 | ATE     | < 5          | < 5        | 63 (4.27)    | < 5        | < 5          | < 5        | 41 (0.38)    | 9 (0.16)   |
|                |                 | IS      | < 5          | < 5        | 29 (1.97)    | < 5        | < 5          | < 5        | 20 (0.19)    | 6 (0.10)   |
|                |                 | TIA     | < 5          | < 5        | 18 (1.22)    | < 5        | < 5          | < 5        | 9 (0.08)     | < 5        |
|                |                 | MI      | < 5          | < 5        | 21 (1.42)    | < 5        | < 5          | < 5        | 13 (0.12)    | < 5        |
|                |                 | HF      | < 5          | < 5        | 240 (16.27)  | < 5        | < 5          | < 5        | 49 (0.46)    | 5 (0.09)   |
|                |                 | HS      | < 5          | < 5        | 8 (0.54)     | < 5        | < 5          | < 5        | 5 (0.05)     | < 5        |
|                |                 | MP      | < 5          | < 5        | < 5          | < 5        | < 5          | < 5        | 6 (0.06)     | < 5        |

VTE = Venous thromboembolism (DVT + PE), DVT = Deep vein thrombosis, PE = Pulmonary embolism, ATE = Arterial thrombosis/thromboembolism (IS + TIA + MI), IS = Ischemic stroke, TIA = Transient ischemic attack, MI = Myocardial infarction, HF = Heart failure, HS = Hemorrhagic stroke, MP = Myocarditis or Pericarditis

**Table S34: Number of records (and risk per 10,000 individuals) for post COVID-19 cardiac and thromboembolic complications, across cohorts and databases, stratified by vaccine (BNT162b2 - ChAdOx1).**

| Cohort          | Time window           | Outcome    | AURUM              |                    | GOLD              |                   |
|-----------------|-----------------------|------------|--------------------|--------------------|-------------------|-------------------|
|                 |                       |            | BNT162b2           | ChAdOx1            | BNT162b2          | ChAdOx1           |
| <b>Cohort 1</b> |                       |            | <b>N = 332,790</b> | <b>N = 219,804</b> | <b>N = 32,755</b> | <b>N = 82,406</b> |
|                 | <b>0 to 30 days</b>   | <b>VTE</b> | 76 (2.28)          | 41 (1.87)          | < 5               | < 5               |
|                 |                       | <b>DVT</b> | 15 (0.45)          | 12 (0.55)          | < 5               | < 5               |
|                 |                       | <b>PE</b>  | 64 (1.92)          | 31 (1.41)          | < 5               | < 5               |
|                 |                       | <b>ATE</b> | 45 (1.35)          | 25 (1.14)          | < 5               | 6 (0.73)          |
|                 |                       | <b>IS</b>  | 5 (0.15)           | < 5                | < 5               | < 5               |
|                 |                       | <b>TIA</b> | 11 (0.33)          | 7 (0.32)           | < 5               | < 5               |
|                 |                       | <b>MI</b>  | 29 (0.87)          | 17 (0.77)          | < 5               | < 5               |
|                 |                       | <b>HF</b>  | 126 (3.79)         | 72 (3.28)          | < 5               | 5 (0.61)          |
|                 |                       | <b>HS</b>  | < 5                | < 5                | < 5               | < 5               |
|                 |                       | <b>MP</b>  | < 5                | < 5                | < 5               | < 5               |
|                 | <b>31 to 90 days</b>  | <b>VTE</b> | 26 (0.78)          | 14 (0.64)          | < 5               | < 5               |
|                 |                       | <b>DVT</b> | 7 (0.21)           | 8 (0.36)           | < 5               | < 5               |
|                 |                       | <b>PE</b>  | 19 (0.57)          | 7 (0.32)           | < 5               | < 5               |
|                 |                       | <b>ATE</b> | 23 (0.69)          | 20 (0.91)          | < 5               | < 5               |
|                 |                       | <b>IS</b>  | < 5                | < 5                | < 5               | < 5               |
|                 |                       | <b>TIA</b> | 10 (0.30)          | 9 (0.41)           | < 5               | < 5               |
|                 |                       | <b>MI</b>  | 11 (0.33)          | 9 (0.41)           | < 5               | < 5               |
|                 |                       | <b>HF</b>  | 71 (2.13)          | 42 (1.91)          | < 5               | 5 (0.61)          |
|                 |                       | <b>HS</b>  | < 5                | < 5                | < 5               | < 5               |
|                 |                       | <b>MP</b>  | < 5                | < 5                | < 5               | < 5               |
|                 | <b>91 to 180 days</b> | <b>VTE</b> | 6 (0.18)           | 15 (0.68)          | < 5               | < 5               |
|                 |                       | <b>DVT</b> | < 5                | 5 (0.23)           | < 5               | < 5               |
|                 |                       | <b>PE</b>  | < 5                | 10 (0.45)          | < 5               | < 5               |
|                 |                       | <b>ATE</b> | 18 (0.54)          | 10 (0.45)          | < 5               | 6 (0.73)          |
|                 |                       | <b>IS</b>  | 6 (0.18)           | < 5                | < 5               | < 5               |
|                 |                       | <b>TIA</b> | 6 (0.18)           | 6 (0.27)           | < 5               | < 5               |
|                 |                       | <b>MI</b>  | 6 (0.18)           | < 5                | < 5               | 5 (0.61)          |
|                 |                       | <b>HF</b>  | 57 (1.71)          | 38 (1.73)          | < 5               | < 5               |
|                 |                       | <b>HS</b>  | < 5                | < 5                | < 5               | < 5               |
|                 |                       | <b>MP</b>  | < 5                | < 5                | < 5               | < 5               |

| Cohort          | Time window     | Outcome | AURUM              |                    | GOLD               |                    |
|-----------------|-----------------|---------|--------------------|--------------------|--------------------|--------------------|
|                 |                 |         | BNT162b2           | ChAdOx1            | BNT162b2           | ChAdOx1            |
|                 | 181 to 365 days | VTE     | 10 (0.30)          | < 5                | < 5                | < 5                |
|                 |                 | DVT     | 6 (0.18)           | < 5                | < 5                | < 5                |
|                 |                 | PE      | < 5                | < 5                | < 5                | < 5                |
|                 |                 | ATE     | 14 (0.42)          | 9 (0.41)           | < 5                | < 5                |
|                 |                 | IS      | < 5                | < 5                | < 5                | < 5                |
|                 |                 | TIA     | < 5                | < 5                | < 5                | < 5                |
|                 |                 | MI      | 7 (0.21)           | < 5                | < 5                | < 5                |
|                 |                 | HF      | 38 (1.14)          | 20 (0.91)          | < 5                | 5 (0.61)           |
|                 |                 | HS      | < 5                | < 5                | < 5                | < 5                |
|                 |                 | MP      | < 5                | < 5                | < 5                | < 5                |
| <b>Cohort 2</b> |                 |         | <b>N = 594,262</b> | <b>N = 969,262</b> | <b>N = 180,670</b> | <b>N = 302,999</b> |
|                 | 0 to 30 days    | VTE     | 62 (1.04)          | 158 (1.63)         | 5 (0.28)           | 19 (0.63)          |
|                 |                 | DVT     | 18 (0.30)          | 47 (0.48)          | < 5                | < 5                |
|                 |                 | PE      | 45 (0.76)          | 120 (1.24)         | < 5                | 15 (0.50)          |
|                 |                 | ATE     | 29 (0.49)          | 75 (0.77)          | < 5                | < 5                |
|                 |                 | IS      | < 5                | 12 (0.12)          | < 5                | < 5                |
|                 |                 | TIA     | 11 (0.19)          | 13 (0.13)          | < 5                | < 5                |
|                 |                 | MI      | 16 (0.27)          | 52 (0.54)          | < 5                | < 5                |
|                 |                 | HF      | 43 (0.72)          | 103 (1.06)         | < 5                | 11 (0.36)          |
|                 |                 | HS      | < 5                | < 5                | < 5                | < 5                |
|                 |                 | MP      | < 5                | 6 (0.06)           | < 5                | < 5                |
|                 | 31 to 90 days   | VTE     | 21 (0.35)          | 55 (0.57)          | < 5                | 9 (0.30)           |
|                 |                 | DVT     | 7 (0.12)           | 25 (0.26)          | < 5                | 5 (0.17)           |
|                 |                 | PE      | 14 (0.24)          | 32 (0.33)          | < 5                | < 5                |
|                 |                 | ATE     | 36 (0.61)          | 57 (0.59)          | < 5                | 5 (0.17)           |
|                 |                 | IS      | 5 (0.08)           | 6 (0.06)           | < 5                | < 5                |
|                 |                 | TIA     | 9 (0.15)           | 25 (0.26)          | < 5                | < 5                |
|                 |                 | MI      | 22 (0.37)          | 28 (0.29)          | < 5                | < 5                |
|                 |                 | HF      | 35 (0.59)          | 68 (0.70)          | < 5                | 7 (0.23)           |
|                 |                 | HS      | < 5                | < 5                | < 5                | < 5                |
|                 |                 | MP      | < 5                | < 5                | < 5                | < 5                |
|                 | 91 to 180 days  | VTE     | 10 (0.17)          | 30 (0.31)          | < 5                | < 5                |
|                 |                 | DVT     | 6 (0.10)           | 16 (0.17)          | < 5                | < 5                |
|                 |                 | PE      | 5 (0.08)           | 16 (0.17)          | < 5                | < 5                |

| Cohort          | Time window     | Outcome | AURUM             |                      | GOLD              |                    |
|-----------------|-----------------|---------|-------------------|----------------------|-------------------|--------------------|
|                 |                 |         | BNT162b2          | ChAdOx1              | BNT162b2          | ChAdOx1            |
|                 |                 | ATE     | 15 (0.25)         | 28 (0.29)            | < 5               | < 5                |
|                 |                 | IS      | < 5               | < 5                  | < 5               | < 5                |
|                 |                 | TIA     | 5 (0.08)          | 13 (0.13)            | < 5               | < 5                |
|                 |                 | MI      | 10 (0.17)         | 15 (0.15)            | < 5               | < 5                |
|                 |                 | HF      | 25 (0.42)         | 44 (0.45)            | < 5               | < 5                |
|                 |                 | HS      | < 5               | < 5                  | < 5               | < 5                |
|                 |                 | MP      | < 5               | < 5                  | < 5               | < 5                |
|                 | 181 to 365 days | VTE     | 8 (0.13)          | 5 (0.05)             | < 5               | < 5                |
|                 |                 | DVT     | < 5               | < 5                  | < 5               | < 5                |
|                 |                 | PE      | 7 (0.12)          | < 5                  | < 5               | < 5                |
|                 |                 | ATE     | 7 (0.12)          | 11 (0.11)            | < 5               | < 5                |
|                 |                 | IS      | < 5               | < 5                  | < 5               | < 5                |
|                 |                 | TIA     | < 5               | < 5                  | < 5               | < 5                |
|                 |                 | MI      | < 5               | 7 (0.07)             | < 5               | < 5                |
|                 |                 | HF      | 12 (0.20)         | 23 (0.24)            | < 5               | < 5                |
|                 |                 | HS      | < 5               | < 5                  | < 5               | < 5                |
|                 |                 | MP      | < 5               | < 5                  | < 5               | < 5                |
| <b>Cohort 3</b> |                 |         | <b>N = 54,102</b> | <b>N = 1,473,602</b> | <b>N = 36,748</b> | <b>N = 423,876</b> |
|                 | 0 to 30 days    | VTE     | < 5               | 139 (0.94)           | < 5               | 16 (0.38)          |
|                 |                 | DVT     | < 5               | 41 (0.28)            | < 5               | < 5                |
|                 |                 | PE      | < 5               | 101 (0.69)           | < 5               | 12 (0.28)          |
|                 |                 | ATE     | < 5               | 47 (0.32)            | < 5               | 12 (0.28)          |
|                 |                 | IS      | < 5               | 5 (0.03)             | < 5               | < 5                |
|                 |                 | TIA     | < 5               | 16 (0.11)            | < 5               | < 5                |
|                 |                 | MI      | < 5               | 26 (0.18)            | < 5               | 9 (0.21)           |
|                 |                 | HF      | 10 (1.85)         | 28 (0.19)            | < 5               | < 5                |
|                 |                 | HS      | < 5               | < 5                  | < 5               | < 5                |
|                 |                 | MP      | < 5               | 6 (0.04)             | < 5               | < 5                |
|                 | 31 to 90 days   | VTE     | < 5               | 44 (0.30)            | < 5               | 7 (0.17)           |
|                 |                 | DVT     | < 5               | 26 (0.18)            | < 5               | < 5                |
|                 |                 | PE      | < 5               | 18 (0.12)            | < 5               | < 5                |
|                 |                 | ATE     | < 5               | 31 (0.21)            | < 5               | 7 (0.17)           |
|                 |                 | IS      | < 5               | < 5                  | < 5               | < 5                |
|                 |                 | TIA     | < 5               | 13 (0.09)            | < 5               | < 5                |

| Cohort | Time window     | Outcome   | AURUM     |                      | GOLD               |                    |                    |
|--------|-----------------|-----------|-----------|----------------------|--------------------|--------------------|--------------------|
|        |                 |           | BNT162b2  | ChAdOx1              | BNT162b2           | ChAdOx1            |                    |
|        | 91 to 180 days  | MI        | < 5       | 16 (0.11)            | < 5                | < 5                |                    |
|        |                 | HF        | < 5       | 23 (0.16)            | < 5                | < 5                |                    |
|        |                 | HS        | < 5       | < 5                  | < 5                | < 5                |                    |
|        |                 | MP        | < 5       | 7 (0.05)             | < 5                | < 5                |                    |
|        |                 | VTE       | < 5       | 26 (0.18)            | < 5                | < 5                |                    |
|        |                 | DVT       | < 5       | 15 (0.10)            | < 5                | < 5                |                    |
|        |                 | PE        | < 5       | 14 (0.10)            | < 5                | < 5                |                    |
|        |                 | ATE       | < 5       | 26 (0.18)            | < 5                | < 5                |                    |
|        |                 | IS        | < 5       | < 5                  | < 5                | < 5                |                    |
|        |                 | TIA       | < 5       | 8 (0.05)             | < 5                | < 5                |                    |
|        |                 | MI        | < 5       | 17 (0.12)            | < 5                | < 5                |                    |
|        |                 | HF        | < 5       | 12 (0.08)            | < 5                | < 5                |                    |
|        |                 | HS        | < 5       | < 5                  | < 5                | < 5                |                    |
|        |                 | MP        | < 5       | < 5                  | < 5                | < 5                |                    |
|        | 181 to 365 days | VTE       | < 5       | 11 (0.07)            | < 5                | < 5                |                    |
|        | DVT             | < 5       | 5 (0.03)  | < 5                  | < 5                |                    |                    |
|        | PE              | < 5       | 7 (0.05)  | < 5                  | < 5                |                    |                    |
|        | ATE             | < 5       | < 5       | < 5                  | < 5                |                    |                    |
|        | IS              | < 5       | < 5       | < 5                  | < 5                |                    |                    |
|        | TIA             | < 5       | < 5       | < 5                  | < 5                |                    |                    |
|        | MI              | < 5       | < 5       | < 5                  | < 5                |                    |                    |
|        | HF              | < 5       | < 5       | < 5                  | < 5                |                    |                    |
|        | HS              | < 5       | < 5       | < 5                  | < 5                |                    |                    |
|        | MP              | < 5       | < 5       | < 5                  | < 5                |                    |                    |
|        | <b>Cohort 4</b> |           |           | <b>N = 1,335,671</b> | <b>N = 542,670</b> | <b>N = 365,096</b> | <b>N = 147,744</b> |
|        | 0 to 30 days    | VTE       | 20 (0.15) | 27 (0.50)            | < 5                | 8 (0.54)           |                    |
| DVT    |                 | 9 (0.07)  | 7 (0.13)  | < 5                  | < 5                |                    |                    |
| PE     |                 | 11 (0.08) | 21 (0.39) | < 5                  | 6 (0.41)           |                    |                    |
| ATE    |                 | < 5       | 5 (0.09)  | < 5                  | < 5                |                    |                    |
| IS     |                 | < 5       | < 5       | < 5                  | < 5                |                    |                    |
| TIA    |                 | < 5       | < 5       | < 5                  | < 5                |                    |                    |
| MI     |                 | < 5       | < 5       | < 5                  | < 5                |                    |                    |
| HF     |                 | < 5       | < 5       | < 5                  | < 5                |                    |                    |
| HS     |                 | < 5       | < 5       | < 5                  | < 5                |                    |                    |



| Cohort | Time window     | Outcome        | AURUM    |           | GOLD     |         |
|--------|-----------------|----------------|----------|-----------|----------|---------|
|        |                 |                | BNT162b2 | ChAdOx1   | BNT162b2 | ChAdOx1 |
|        |                 | MP             | < 5      | < 5       | < 5      | < 5     |
|        | 31 to 90 days   | VTE            | 7 (0.05) | 14 (0.26) | < 5      | < 5     |
|        |                 | DVT            | < 5      | 8 (0.15)  | < 5      | < 5     |
|        |                 | PE             | < 5      | 6 (0.11)  | < 5      | < 5     |
|        |                 | ATE            | < 5      | < 5       | < 5      | < 5     |
|        |                 | IS             | < 5      | < 5       | < 5      | < 5     |
|        |                 | TIA            | < 5      | < 5       | < 5      | < 5     |
|        |                 | MI             | < 5      | < 5       | < 5      | < 5     |
|        |                 | HF             | 6 (0.04) | < 5       | < 5      | < 5     |
|        |                 | HS             | < 5      | < 5       | < 5      | < 5     |
|        |                 | MP             | < 5      | < 5       | < 5      | < 5     |
|        |                 | 91 to 180 days | VTE      | 9 (0.07)  | < 5      | < 5     |
|        | DVT             |                | 7 (0.05) | < 5       | < 5      | < 5     |
|        | PE              |                | < 5      | < 5       | < 5      | < 5     |
|        | ATE             |                | < 5      | < 5       | < 5      | < 5     |
|        | IS              |                | < 5      | < 5       | < 5      | < 5     |
|        | TIA             |                | < 5      | < 5       | < 5      | < 5     |
|        | MI              |                | < 5      | < 5       | < 5      | < 5     |
|        | HF              |                | < 5      | < 5       | < 5      | < 5     |
|        | HS              |                | < 5      | < 5       | < 5      | < 5     |
|        | MP              |                | < 5      | < 5       | < 5      | < 5     |
|        | 181 to 365 days |                | VTE      | < 5       | < 5      | < 5     |
|        |                 | DVT            | < 5      | < 5       | < 5      | < 5     |
|        |                 | PE             | < 5      | < 5       | < 5      | < 5     |
|        |                 | ATE            | < 5      | < 5       | < 5      | < 5     |
|        |                 | IS             | < 5      | < 5       | < 5      | < 5     |
|        |                 | TIA            | < 5      | < 5       | < 5      | < 5     |
|        |                 | MI             | < 5      | < 5       | < 5      | < 5     |
|        |                 | HF             | < 5      | < 5       | < 5      | < 5     |
|        |                 | HS             | < 5      | < 5       | < 5      | < 5     |
|        |                 | MP             | < 5      | < 5       | < 5      | < 5     |

VTE = Venous thromboembolism (DVT + PE), DVT = Deep vein thrombosis, PE = Pulmonary embolism, ATE = Arterial thrombosis/thromboembolism (IS + TIA + MI), IS = Ischemic stroke, TIA = Transient ischemic attack, MI = Myocardial infarction, HF = Heart failure, HS = Hemorrhagic stroke, MP = Myocarditis or Pericarditis

**Table S35: Number of records (and risk per 10,000 individuals) for post COVID-19 cardiac and thromboembolic complications, across cohorts and databases, stratified by vaccine (BNT162b2 - ChAdOx1). Follow-up ends at first vaccine dose after index date.**

| Cohort          | Time window           | Outcome    | AURUM              |                    | GOLD              |                   |
|-----------------|-----------------------|------------|--------------------|--------------------|-------------------|-------------------|
|                 |                       |            | BNT162b2           | ChAdOx1            | BNT162b2          | ChAdOx1           |
| <b>Cohort 1</b> |                       |            | <b>N = 332,790</b> | <b>N = 219,804</b> | <b>N = 32,755</b> | <b>N = 82,406</b> |
|                 | <b>0 to 30 days</b>   | <b>VTE</b> | 31 (0.93)          | 14 (0.64)          | < 5               | < 5               |
|                 |                       | <b>DVT</b> | 8 (0.24)           | < 5                | < 5               | < 5               |
|                 |                       | <b>PE</b>  | 24 (0.72)          | 13 (0.59)          | < 5               | < 5               |
|                 |                       | <b>ATE</b> | 18 (0.54)          | 10 (0.45)          | < 5               | < 5               |
|                 |                       | <b>IS</b>  | < 5                | < 5                | < 5               | < 5               |
|                 |                       | <b>TIA</b> | < 5                | < 5                | < 5               | < 5               |
|                 |                       | <b>MI</b>  | 14 (0.42)          | 6 (0.27)           | < 5               | < 5               |
|                 |                       | <b>HF</b>  | 45 (1.35)          | 28 (1.27)          | < 5               | < 5               |
|                 |                       | <b>HS</b>  | < 5                | < 5                | < 5               | < 5               |
|                 |                       | <b>MP</b>  | < 5                | < 5                | < 5               | < 5               |
|                 | <b>31 to 90 days</b>  | <b>VTE</b> | 15 (0.45)          | 5 (0.23)           | < 5               | < 5               |
|                 |                       | <b>DVT</b> | < 5                | < 5                | < 5               | < 5               |
|                 |                       | <b>PE</b>  | 11 (0.33)          | < 5                | < 5               | < 5               |
|                 |                       | <b>ATE</b> | 8 (0.24)           | 8 (0.36)           | < 5               | < 5               |
|                 |                       | <b>IS</b>  | < 5                | < 5                | < 5               | < 5               |
|                 |                       | <b>TIA</b> | < 5                | < 5                | < 5               | < 5               |
|                 |                       | <b>MI</b>  | < 5                | < 5                | < 5               | < 5               |
|                 |                       | <b>HF</b>  | 36 (1.08)          | 20 (0.91)          | < 5               | < 5               |
|                 |                       | <b>HS</b>  | < 5                | < 5                | < 5               | < 5               |
|                 |                       | <b>MP</b>  | < 5                | < 5                | < 5               | < 5               |
|                 | <b>91 to 180 days</b> | <b>VTE</b> | < 5                | 5 (0.23)           | < 5               | < 5               |
|                 |                       | <b>DVT</b> | < 5                | < 5                | < 5               | < 5               |
|                 |                       | <b>PE</b>  | < 5                | < 5                | < 5               | < 5               |
|                 |                       | <b>ATE</b> | 10 (0.30)          | < 5                | < 5               | < 5               |
|                 |                       | <b>IS</b>  | < 5                | < 5                | < 5               | < 5               |
|                 |                       | <b>TIA</b> | < 5                | < 5                | < 5               | < 5               |
|                 |                       | <b>MI</b>  | < 5                | < 5                | < 5               | < 5               |
|                 |                       | <b>HF</b>  | 32 (0.96)          | 19 (0.86)          | < 5               | < 5               |
|                 |                       | <b>HS</b>  | < 5                | < 5                | < 5               | < 5               |
|                 |                       | <b>MP</b>  | < 5                | < 5                | < 5               | < 5               |

| Cohort          | Time window | Outcome | AURUM              |                    | GOLD               |                    |
|-----------------|-------------|---------|--------------------|--------------------|--------------------|--------------------|
|                 |             |         | BNT162b2           | ChAdOx1            | BNT162b2           | ChAdOx1            |
| 181 to 365 days | VTE         | VTE     | 7 (0.21)           | < 5                | < 5                | < 5                |
|                 |             | DVT     | < 5                | < 5                | < 5                | < 5                |
|                 |             | PE      | < 5                | < 5                | < 5                | < 5                |
|                 |             | ATE     | 11 (0.33)          | 8 (0.36)           | < 5                | < 5                |
|                 |             | IS      | < 5                | < 5                | < 5                | < 5                |
|                 |             | TIA     | < 5                | < 5                | < 5                | < 5                |
|                 |             | MI      | 6 (0.18)           | < 5                | < 5                | < 5                |
|                 |             | HF      | 35 (1.05)          | 18 (0.82)          | < 5                | 5 (0.61)           |
|                 |             | HS      | < 5                | < 5                | < 5                | < 5                |
|                 |             | MP      | < 5                | < 5                | < 5                | < 5                |
| <b>Cohort 2</b> |             |         | <b>N = 594,262</b> | <b>N = 969,262</b> | <b>N = 180,670</b> | <b>N = 302,999</b> |
| 0 to 30 days    | VTE         | VTE     | 14 (0.24)          | 40 (0.41)          | < 5                | < 5                |
|                 |             | DVT     | 6 (0.10)           | 13 (0.13)          | < 5                | < 5                |
|                 |             | PE      | 8 (0.13)           | 30 (0.31)          | < 5                | < 5                |
|                 |             | ATE     | 14 (0.24)          | 11 (0.11)          | < 5                | < 5                |
|                 |             | IS      | < 5                | < 5                | < 5                | < 5                |
|                 |             | TIA     | < 5                | < 5                | < 5                | < 5                |
|                 |             | MI      | 8 (0.13)           | 9 (0.09)           | < 5                | < 5                |
|                 |             | HF      | 15 (0.25)          | 32 (0.33)          | < 5                | < 5                |
|                 |             | HS      | < 5                | < 5                | < 5                | < 5                |
|                 |             | MP      | < 5                | < 5                | < 5                | < 5                |
| 31 to 90 days   | VTE         | VTE     | 5 (0.08)           | 8 (0.08)           | < 5                | < 5                |
|                 |             | DVT     | < 5                | 5 (0.05)           | < 5                | < 5                |
|                 |             | PE      | < 5                | < 5                | < 5                | < 5                |
|                 |             | ATE     | 9 (0.15)           | 9 (0.09)           | < 5                | < 5                |
|                 |             | IS      | < 5                | < 5                | < 5                | < 5                |
|                 |             | TIA     | < 5                | < 5                | < 5                | < 5                |
|                 |             | MI      | < 5                | 6 (0.06)           | < 5                | < 5                |
|                 |             | HF      | 17 (0.29)          | 13 (0.13)          | < 5                | < 5                |
|                 |             | HS      | < 5                | < 5                | < 5                | < 5                |
|                 |             | MP      | < 5                | < 5                | < 5                | < 5                |
| 91 to 180 days  | VTE         | VTE     | < 5                | 12 (0.12)          | < 5                | < 5                |
|                 |             | DVT     | < 5                | 7 (0.07)           | < 5                | < 5                |
|                 |             | PE      | < 5                | 5 (0.05)           | < 5                | < 5                |

| Cohort          | Time window     | Outcome | AURUM             |                      | GOLD              |                    |
|-----------------|-----------------|---------|-------------------|----------------------|-------------------|--------------------|
|                 |                 |         | BNT162b2          | ChAdOx1              | BNT162b2          | ChAdOx1            |
|                 |                 | ATE     | 5 (0.08)          | 10 (0.10)            | < 5               | < 5                |
|                 |                 | IS      | < 5               | < 5                  | < 5               | < 5                |
|                 |                 | TIA     | < 5               | < 5                  | < 5               | < 5                |
|                 |                 | MI      | < 5               | 6 (0.06)             | < 5               | < 5                |
|                 |                 | HF      | 9 (0.15)          | 18 (0.19)            | < 5               | < 5                |
|                 |                 | HS      | < 5               | < 5                  | < 5               | < 5                |
|                 |                 | MP      | < 5               | < 5                  | < 5               | < 5                |
|                 | 181 to 365 days | VTE     | 7 (0.12)          | 5 (0.05)             | < 5               | < 5                |
|                 |                 | DVT     | < 5               | < 5                  | < 5               | < 5                |
|                 |                 | PE      | 5 (0.08)          | < 5                  | < 5               | < 5                |
|                 |                 | ATE     | 6 (0.10)          | 10 (0.10)            | < 5               | < 5                |
|                 |                 | IS      | < 5               | < 5                  | < 5               | < 5                |
|                 |                 | TIA     | < 5               | < 5                  | < 5               | < 5                |
|                 |                 | MI      | < 5               | 6 (0.06)             | < 5               | < 5                |
|                 |                 | HF      | 11 (0.19)         | 20 (0.21)            | < 5               | < 5                |
|                 |                 | HS      | < 5               | < 5                  | < 5               | < 5                |
|                 |                 | MP      | < 5               | < 5                  | < 5               | < 5                |
| <b>Cohort 3</b> |                 |         | <b>N = 54,102</b> | <b>N = 1,473,602</b> | <b>N = 36,748</b> | <b>N = 423,876</b> |
|                 | 0 to 30 days    | VTE     | < 5               | 23 (0.16)            | < 5               | < 5                |
|                 |                 | DVT     | < 5               | < 5                  | < 5               | < 5                |
|                 |                 | PE      | < 5               | 19 (0.13)            | < 5               | < 5                |
|                 |                 | ATE     | < 5               | 8 (0.05)             | < 5               | < 5                |
|                 |                 | IS      | < 5               | < 5                  | < 5               | < 5                |
|                 |                 | TIA     | < 5               | < 5                  | < 5               | < 5                |
|                 |                 | MI      | < 5               | 7 (0.05)             | < 5               | < 5                |
|                 |                 | HF      | 7 (1.29)          | 11 (0.07)            | < 5               | < 5                |
|                 |                 | HS      | < 5               | < 5                  | < 5               | < 5                |
|                 |                 | MP      | < 5               | < 5                  | < 5               | < 5                |
|                 | 31 to 90 days   | VTE     | < 5               | < 5                  | < 5               | < 5                |
|                 |                 | DVT     | < 5               | < 5                  | < 5               | < 5                |
|                 |                 | PE      | < 5               | < 5                  | < 5               | < 5                |
|                 |                 | ATE     | < 5               | 6 (0.04)             | < 5               | < 5                |
|                 |                 | IS      | < 5               | < 5                  | < 5               | < 5                |
|                 |                 | TIA     | < 5               | < 5                  | < 5               | < 5                |

| Cohort   | Time window    | Outcome         | AURUM         |             | GOLD        |             |     |
|----------|----------------|-----------------|---------------|-------------|-------------|-------------|-----|
|          |                |                 | BNT162b2      | ChAdOx1     | BNT162b2    | ChAdOx1     |     |
| Cohort 3 |                | MI              | < 5           | < 5         | < 5         | < 5         |     |
|          |                | HF              | < 5           | 5 (0.03)    | < 5         | < 5         |     |
|          |                | HS              | < 5           | < 5         | < 5         | < 5         |     |
|          |                | MP              | < 5           | < 5         | < 5         | < 5         |     |
|          | 91 to 180 days | VTE             | < 5           | 8 (0.05)    | < 5         | < 5         |     |
|          |                | DVT             | < 5           | 6 (0.04)    | < 5         | < 5         |     |
|          |                | PE              | < 5           | < 5         | < 5         | < 5         |     |
|          |                | ATE             | < 5           | 7 (0.05)    | < 5         | < 5         |     |
|          |                | IS              | < 5           | < 5         | < 5         | < 5         |     |
|          |                | TIA             | < 5           | < 5         | < 5         | < 5         |     |
|          |                | MI              | < 5           | < 5         | < 5         | < 5         |     |
|          |                | HF              | < 5           | < 5         | < 5         | < 5         |     |
|          |                | HS              | < 5           | < 5         | < 5         | < 5         |     |
|          |                | MP              | < 5           | < 5         | < 5         | < 5         |     |
|          |                | 181 to 365 days | VTE           | < 5         | 9 (0.06)    | < 5         | < 5 |
|          |                |                 | DVT           | < 5         | < 5         | < 5         | < 5 |
|          | PE             |                 | < 5           | 6 (0.04)    | < 5         | < 5         |     |
|          | ATE            |                 | < 5           | < 5         | < 5         | < 5         |     |
|          | IS             |                 | < 5           | < 5         | < 5         | < 5         |     |
|          | TIA            |                 | < 5           | < 5         | < 5         | < 5         |     |
|          | MI             |                 | < 5           | < 5         | < 5         | < 5         |     |
|          | HF             |                 | < 5           | < 5         | < 5         | < 5         |     |
|          | HS             |                 | < 5           | < 5         | < 5         | < 5         |     |
|          | MP             |                 | < 5           | < 5         | < 5         | < 5         |     |
|          | Cohort 4       |                 | N = 1,335,671 | N = 542,670 | N = 365,096 | N = 147,744 |     |
|          | 0 to 30 days   | VTE             | 9 (0.07)      | 8 (0.15)    | < 5         | 6 (0.41)    |     |
| DVT      |                | 5 (0.04)        | < 5           | < 5         | < 5         |             |     |
| PE       |                | < 5             | 7 (0.13)      | < 5         | 6 (0.41)    |             |     |
| ATE      |                | < 5             | < 5           | < 5         | < 5         |             |     |
| IS       |                | < 5             | < 5           | < 5         | < 5         |             |     |
| TIA      |                | < 5             | < 5           | < 5         | < 5         |             |     |
| MI       |                | < 5             | < 5           | < 5         | < 5         |             |     |
| HF       |                | < 5             | < 5           | < 5         | < 5         |             |     |
| HS       |                | < 5             | < 5           | < 5         | < 5         |             |     |

| Cohort | Time window     | Outcome        | AURUM    |          | GOLD     |         |
|--------|-----------------|----------------|----------|----------|----------|---------|
|        |                 |                | BNT162b2 | ChAdOx1  | BNT162b2 | ChAdOx1 |
|        |                 | MP             | < 5      | < 5      | < 5      | < 5     |
|        | 31 to 90 days   | VTE            | < 5      | 8 (0.15) | < 5      | < 5     |
|        |                 | DVT            | < 5      | < 5      | < 5      | < 5     |
|        |                 | PE             | < 5      | 5 (0.09) | < 5      | < 5     |
|        |                 | ATE            | < 5      | < 5      | < 5      | < 5     |
|        |                 | IS             | < 5      | < 5      | < 5      | < 5     |
|        |                 | TIA            | < 5      | < 5      | < 5      | < 5     |
|        |                 | MI             | < 5      | < 5      | < 5      | < 5     |
|        |                 | HF             | 6 (0.04) | < 5      | < 5      | < 5     |
|        |                 | HS             | < 5      | < 5      | < 5      | < 5     |
|        |                 | MP             | < 5      | < 5      | < 5      | < 5     |
|        |                 | 91 to 180 days | VTE      | 8 (0.06) | < 5      | < 5     |
|        | DVT             |                | 7 (0.05) | < 5      | < 5      | < 5     |
|        | PE              |                | < 5      | < 5      | < 5      | < 5     |
|        | ATE             |                | < 5      | < 5      | < 5      | < 5     |
|        | IS              |                | < 5      | < 5      | < 5      | < 5     |
|        | TIA             |                | < 5      | < 5      | < 5      | < 5     |
|        | MI              |                | < 5      | < 5      | < 5      | < 5     |
|        | HF              |                | < 5      | < 5      | < 5      | < 5     |
|        | HS              |                | < 5      | < 5      | < 5      | < 5     |
|        | MP              |                | < 5      | < 5      | < 5      | < 5     |
|        | 181 to 365 days |                | VTE      | < 5      | < 5      | < 5     |
|        |                 | DVT            | < 5      | < 5      | < 5      | < 5     |
|        |                 | PE             | < 5      | < 5      | < 5      | < 5     |
|        |                 | ATE            | < 5      | < 5      | < 5      | < 5     |
|        |                 | IS             | < 5      | < 5      | < 5      | < 5     |
|        |                 | TIA            | < 5      | < 5      | < 5      | < 5     |
|        |                 | MI             | < 5      | < 5      | < 5      | < 5     |
|        |                 | HF             | < 5      | < 5      | < 5      | < 5     |
|        |                 | HS             | < 5      | < 5      | < 5      | < 5     |
|        |                 | MP             | < 5      | < 5      | < 5      | < 5     |

VTE = Venous thromboembolism (DVT + PE), DVT = Deep vein thrombosis, PE = Pulmonary embolism, ATE = Arterial thrombosis/thromboembolism (IS + TIA + MI), IS = Ischemic stroke, TIA = Transient ischemic attack, MI = Myocardial infarction, HF = Heart failure, HS = Hemorrhagic stroke, MP = Myocarditis or Pericarditis

**Table S36: Number of records (and risk per 10,000 individuals) for post COVID-19 cardiac and thromboembolic complications, across cohorts and databases, stratified by vaccine (BNT162b2 - ChAdOx1). Only first outcome after COVID-19 captured.**

| Cohort          | Time window           | Outcome    | AURUM              |                    | GOLD              |                   |
|-----------------|-----------------------|------------|--------------------|--------------------|-------------------|-------------------|
|                 |                       |            | BNT162b2           | ChAdOx1            | BNT162b2          | ChAdOx1           |
| <b>Cohort 1</b> |                       |            | <b>N = 332,790</b> | <b>N = 219,804</b> | <b>N = 32,755</b> | <b>N = 82,406</b> |
|                 | <b>0 to 30 days</b>   | <b>VTE</b> | 76 (2.28)          | 41 (1.87)          | < 5               | < 5               |
|                 |                       | <b>DVT</b> | 15 (0.45)          | 12 (0.55)          | < 5               | < 5               |
|                 |                       | <b>PE</b>  | 64 (1.92)          | 31 (1.41)          | < 5               | < 5               |
|                 |                       | <b>ATE</b> | 45 (1.35)          | 25 (1.14)          | < 5               | 6 (0.73)          |
|                 |                       | <b>IS</b>  | 5 (0.15)           | < 5                | < 5               | < 5               |
|                 |                       | <b>TIA</b> | 11 (0.33)          | 7 (0.32)           | < 5               | < 5               |
|                 |                       | <b>MI</b>  | 29 (0.87)          | 17 (0.77)          | < 5               | < 5               |
|                 |                       | <b>HF</b>  | 126 (3.79)         | 72 (3.28)          | < 5               | 5 (0.61)          |
|                 |                       | <b>HS</b>  | < 5                | < 5                | < 5               | < 5               |
|                 |                       | <b>MP</b>  | < 5                | < 5                | < 5               | < 5               |
|                 | <b>31 to 90 days</b>  | <b>VTE</b> | 25 (0.75)          | 14 (0.64)          | < 5               | < 5               |
|                 |                       | <b>DVT</b> | 7 (0.21)           | 8 (0.36)           | < 5               | < 5               |
|                 |                       | <b>PE</b>  | 18 (0.54)          | 7 (0.32)           | < 5               | < 5               |
|                 |                       | <b>ATE</b> | 23 (0.69)          | 20 (0.91)          | < 5               | < 5               |
|                 |                       | <b>IS</b>  | < 5                | < 5                | < 5               | < 5               |
|                 |                       | <b>TIA</b> | 10 (0.30)          | 9 (0.41)           | < 5               | < 5               |
|                 |                       | <b>MI</b>  | 11 (0.33)          | 9 (0.41)           | < 5               | < 5               |
|                 |                       | <b>HF</b>  | 70 (2.10)          | 39 (1.77)          | < 5               | 5 (0.61)          |
|                 |                       | <b>HS</b>  | < 5                | < 5                | < 5               | < 5               |
|                 |                       | <b>MP</b>  | < 5                | < 5                | < 5               | < 5               |
|                 | <b>91 to 180 days</b> | <b>VTE</b> | < 5                | 15 (0.68)          | < 5               | < 5               |
|                 |                       | <b>DVT</b> | < 5                | 5 (0.23)           | < 5               | < 5               |
|                 |                       | <b>PE</b>  | < 5                | 10 (0.45)          | < 5               | < 5               |
|                 |                       | <b>ATE</b> | 18 (0.54)          | 10 (0.45)          | < 5               | 6 (0.73)          |
|                 |                       | <b>IS</b>  | 6 (0.18)           | < 5                | < 5               | < 5               |
|                 |                       | <b>TIA</b> | 6 (0.18)           | 6 (0.27)           | < 5               | < 5               |
|                 |                       | <b>MI</b>  | 6 (0.18)           | < 5                | < 5               | 5 (0.61)          |
|                 |                       | <b>HF</b>  | 54 (1.62)          | 35 (1.59)          | < 5               | < 5               |
|                 |                       | <b>HS</b>  | < 5                | < 5                | < 5               | < 5               |
|                 |                       | <b>MP</b>  | < 5                | < 5                | < 5               | < 5               |

| Cohort          | Time window     | Outcome | AURUM              |                    | GOLD               |                    |
|-----------------|-----------------|---------|--------------------|--------------------|--------------------|--------------------|
|                 |                 |         | BNT162b2           | ChAdOx1            | BNT162b2           | ChAdOx1            |
|                 | 181 to 365 days | VTE     | 10 (0.30)          | < 5                | < 5                | < 5                |
|                 |                 | DVT     | 6 (0.18)           | < 5                | < 5                | < 5                |
|                 |                 | PE      | < 5                | < 5                | < 5                | < 5                |
|                 |                 | ATE     | 14 (0.42)          | 9 (0.41)           | < 5                | < 5                |
|                 |                 | IS      | < 5                | < 5                | < 5                | < 5                |
|                 |                 | TIA     | < 5                | < 5                | < 5                | < 5                |
|                 |                 | MI      | 7 (0.21)           | < 5                | < 5                | < 5                |
|                 |                 | HF      | 35 (1.05)          | 18 (0.82)          | < 5                | 5 (0.61)           |
|                 |                 | HS      | < 5                | < 5                | < 5                | < 5                |
|                 |                 | MP      | < 5                | < 5                | < 5                | < 5                |
| <b>Cohort 2</b> |                 |         | <b>N = 594,262</b> | <b>N = 969,262</b> | <b>N = 180,670</b> | <b>N = 302,999</b> |
|                 | 0 to 30 days    | VTE     | 62 (1.04)          | 158 (1.63)         | 5 (0.28)           | 19 (0.63)          |
|                 |                 | DVT     | 18 (0.30)          | 47 (0.48)          | < 5                | < 5                |
|                 |                 | PE      | 45 (0.76)          | 120 (1.24)         | < 5                | 15 (0.50)          |
|                 |                 | ATE     | 29 (0.49)          | 75 (0.77)          | < 5                | < 5                |
|                 |                 | IS      | < 5                | 12 (0.12)          | < 5                | < 5                |
|                 |                 | TIA     | 11 (0.19)          | 13 (0.13)          | < 5                | < 5                |
|                 |                 | MI      | 16 (0.27)          | 52 (0.54)          | < 5                | < 5                |
|                 |                 | HF      | 43 (0.72)          | 103 (1.06)         | < 5                | 11 (0.36)          |
|                 |                 | HS      | < 5                | < 5                | < 5                | < 5                |
|                 |                 | MP      | < 5                | 6 (0.06)           | < 5                | < 5                |
|                 | 31 to 90 days   | VTE     | 21 (0.35)          | 54 (0.56)          | < 5                | 9 (0.30)           |
|                 |                 | DVT     | 7 (0.12)           | 25 (0.26)          | < 5                | 5 (0.17)           |
|                 |                 | PE      | 14 (0.24)          | 31 (0.32)          | < 5                | < 5                |
|                 |                 | ATE     | 36 (0.61)          | 56 (0.58)          | < 5                | 5 (0.17)           |
|                 |                 | IS      | 5 (0.08)           | 6 (0.06)           | < 5                | < 5                |
|                 |                 | TIA     | 9 (0.15)           | 24 (0.25)          | < 5                | < 5                |
|                 |                 | MI      | 22 (0.37)          | 28 (0.29)          | < 5                | < 5                |
|                 |                 | HF      | 34 (0.57)          | 65 (0.67)          | < 5                | 7 (0.23)           |
|                 |                 | HS      | < 5                | < 5                | < 5                | < 5                |
|                 |                 | MP      | < 5                | < 5                | < 5                | < 5                |
|                 | 91 to 180 days  | VTE     | 9 (0.15)           | 28 (0.29)          | < 5                | < 5                |
|                 |                 | DVT     | 6 (0.10)           | 15 (0.15)          | < 5                | < 5                |
|                 |                 | PE      | < 5                | 15 (0.15)          | < 5                | < 5                |



| Cohort          | Time window     | Outcome | AURUM             |                      | GOLD              |                    |
|-----------------|-----------------|---------|-------------------|----------------------|-------------------|--------------------|
|                 |                 |         | BNT162b2          | ChAdOx1              | BNT162b2          | ChAdOx1            |
|                 |                 | ATE     | 15 (0.25)         | 28 (0.29)            | < 5               | < 5                |
|                 |                 | IS      | < 5               | < 5                  | < 5               | < 5                |
|                 |                 | TIA     | 5 (0.08)          | 13 (0.13)            | < 5               | < 5                |
|                 |                 | MI      | 10 (0.17)         | 15 (0.15)            | < 5               | < 5                |
|                 |                 | HF      | 24 (0.40)         | 41 (0.42)            | < 5               | < 5                |
|                 |                 | HS      | < 5               | < 5                  | < 5               | < 5                |
|                 |                 | MP      | < 5               | < 5                  | < 5               | < 5                |
|                 | 181 to 365 days | VTE     | 8 (0.13)          | < 5                  | < 5               | < 5                |
|                 |                 | DVT     | < 5               | < 5                  | < 5               | < 5                |
|                 |                 | PE      | 7 (0.12)          | < 5                  | < 5               | < 5                |
|                 |                 | ATE     | 7 (0.12)          | 10 (0.10)            | < 5               | < 5                |
|                 |                 | IS      | < 5               | < 5                  | < 5               | < 5                |
|                 |                 | TIA     | < 5               | < 5                  | < 5               | < 5                |
|                 |                 | MI      | < 5               | 6 (0.06)             | < 5               | < 5                |
|                 |                 | HF      | 12 (0.20)         | 22 (0.23)            | < 5               | < 5                |
|                 |                 | HS      | < 5               | < 5                  | < 5               | < 5                |
|                 |                 | MP      | < 5               | < 5                  | < 5               | < 5                |
| <b>Cohort 3</b> |                 |         | <b>N = 54,102</b> | <b>N = 1,473,602</b> | <b>N = 36,748</b> | <b>N = 423,876</b> |
|                 | 0 to 30 days    | VTE     | < 5               | 139 (0.94)           | < 5               | 16 (0.38)          |
|                 |                 | DVT     | < 5               | 41 (0.28)            | < 5               | < 5                |
|                 |                 | PE      | < 5               | 101 (0.69)           | < 5               | 12 (0.28)          |
|                 |                 | ATE     | < 5               | 47 (0.32)            | < 5               | 12 (0.28)          |
|                 |                 | IS      | < 5               | 5 (0.03)             | < 5               | < 5                |
|                 |                 | TIA     | < 5               | 16 (0.11)            | < 5               | < 5                |
|                 |                 | MI      | < 5               | 26 (0.18)            | < 5               | 9 (0.21)           |
|                 |                 | HF      | 10 (1.85)         | 28 (0.19)            | < 5               | < 5                |
|                 |                 | HS      | < 5               | < 5                  | < 5               | < 5                |
|                 |                 | MP      | < 5               | 6 (0.04)             | < 5               | < 5                |
|                 | 31 to 90 days   | VTE     | < 5               | 44 (0.30)            | < 5               | 6 (0.14)           |
|                 |                 | DVT     | < 5               | 26 (0.18)            | < 5               | < 5                |
|                 |                 | PE      | < 5               | 18 (0.12)            | < 5               | < 5                |
|                 |                 | ATE     | < 5               | 31 (0.21)            | < 5               | 7 (0.17)           |
|                 |                 | TIA     | < 5               | 13 (0.09)            | < 5               | < 5                |

| Cohort | Time window     | Outcome         | AURUM                |                    | GOLD               |                    |     |
|--------|-----------------|-----------------|----------------------|--------------------|--------------------|--------------------|-----|
|        |                 |                 | BNT162b2             | ChAdOx1            | BNT162b2           | ChAdOx1            |     |
|        |                 | MI              | < 5                  | 16 (0.11)          | < 5                | < 5                |     |
|        |                 | HF              | < 5                  | 23 (0.16)          | < 5                | < 5                |     |
|        |                 | HS              | < 5                  | < 5                | < 5                | < 5                |     |
|        |                 | MP              | < 5                  | 7 (0.05)           | < 5                | < 5                |     |
|        | 91 to 180 days  | VTE             | < 5                  | 25 (0.17)          | < 5                | < 5                |     |
|        |                 | DVT             | < 5                  | 15 (0.10)          | < 5                | < 5                |     |
|        |                 | PE              | < 5                  | 13 (0.09)          | < 5                | < 5                |     |
|        |                 | ATE             | < 5                  | 26 (0.18)          | < 5                | < 5                |     |
|        |                 | IS              | < 5                  | < 5                | < 5                | < 5                |     |
|        |                 | TIA             | < 5                  | 8 (0.05)           | < 5                | < 5                |     |
|        |                 | MI              | < 5                  | 17 (0.12)          | < 5                | < 5                |     |
|        |                 | HF              | < 5                  | 10 (0.07)          | < 5                | < 5                |     |
|        |                 | HS              | < 5                  | < 5                | < 5                | < 5                |     |
|        |                 | MP              | < 5                  | < 5                | < 5                | < 5                |     |
|        |                 | 181 to 365 days | VTE                  | < 5                | 9 (0.06)           | < 5                | < 5 |
|        |                 |                 | DVT                  | < 5                | < 5                | < 5                | < 5 |
|        | PE              |                 | < 5                  | 6 (0.04)           | < 5                | < 5                |     |
|        | ATE             |                 | < 5                  | < 5                | < 5                | < 5                |     |
|        | IS              |                 | < 5                  | < 5                | < 5                | < 5                |     |
|        | TIA             |                 | < 5                  | < 5                | < 5                | < 5                |     |
|        | MI              |                 | < 5                  | < 5                | < 5                | < 5                |     |
|        | HF              |                 | < 5                  | < 5                | < 5                | < 5                |     |
|        | HS              |                 | < 5                  | < 5                | < 5                | < 5                |     |
|        | MP              |                 | < 5                  | < 5                | < 5                | < 5                |     |
|        | <b>Cohort 4</b> |                 | <b>N = 1,335,671</b> | <b>N = 542,670</b> | <b>N = 365,096</b> | <b>N = 147,744</b> |     |
|        | 0 to 30 days    | VTE             | 20 (0.15)            | 27 (0.50)          | < 5                | 8 (0.54)           |     |
| DVT    |                 | 9 (0.07)        | 7 (0.13)             | < 5                | < 5                |                    |     |
| PE     |                 | 11 (0.08)       | 21 (0.39)            | < 5                | 6 (0.41)           |                    |     |
| ATE    |                 | < 5             | 5 (0.09)             | < 5                | < 5                |                    |     |
| IS     |                 | < 5             | < 5                  | < 5                | < 5                |                    |     |
| TIA    |                 | < 5             | < 5                  | < 5                | < 5                |                    |     |
| MI     |                 | < 5             | < 5                  | < 5                | < 5                |                    |     |
| HF     |                 | < 5             | < 5                  | < 5                | < 5                |                    |     |
| HS     |                 | < 5             | < 5                  | < 5                | < 5                |                    |     |

| Cohort | Time window     | Outcome        | AURUM    |           | GOLD     |         |
|--------|-----------------|----------------|----------|-----------|----------|---------|
|        |                 |                | BNT162b2 | ChAdOx1   | BNT162b2 | ChAdOx1 |
|        |                 | MP             | < 5      | < 5       | < 5      | < 5     |
|        | 31 to 90 days   | VTE            | 7 (0.05) | 14 (0.26) | < 5      | < 5     |
|        |                 | DVT            | < 5      | 8 (0.15)  | < 5      | < 5     |
|        |                 | PE             | < 5      | 6 (0.11)  | < 5      | < 5     |
|        |                 | ATE            | < 5      | < 5       | < 5      | < 5     |
|        |                 | IS             | < 5      | < 5       | < 5      | < 5     |
|        |                 | TIA            | < 5      | < 5       | < 5      | < 5     |
|        |                 | MI             | < 5      | < 5       | < 5      | < 5     |
|        |                 | HF             | 6 (0.04) | < 5       | < 5      | < 5     |
|        |                 | HS             | < 5      | < 5       | < 5      | < 5     |
|        |                 | MP             | < 5      | < 5       | < 5      | < 5     |
|        |                 | 91 to 180 days | VTE      | 9 (0.07)  | < 5      | < 5     |
|        | DVT             |                | 7 (0.05) | < 5       | < 5      | < 5     |
|        | PE              |                | < 5      | < 5       | < 5      | < 5     |
|        | ATE             |                | < 5      | < 5       | < 5      | < 5     |
|        | IS              |                | < 5      | < 5       | < 5      | < 5     |
|        | TIA             |                | < 5      | < 5       | < 5      | < 5     |
|        | MI              |                | < 5      | < 5       | < 5      | < 5     |
|        | HF              |                | < 5      | < 5       | < 5      | < 5     |
|        | HS              |                | < 5      | < 5       | < 5      | < 5     |
|        | MP              |                | < 5      | < 5       | < 5      | < 5     |
|        | 181 to 365 days |                | VTE      | < 5       | < 5      | < 5     |
|        |                 | DVT            | < 5      | < 5       | < 5      | < 5     |
|        |                 | PE             | < 5      | < 5       | < 5      | < 5     |
|        |                 | ATE            | < 5      | < 5       | < 5      | < 5     |
|        |                 | IS             | < 5      | < 5       | < 5      | < 5     |
|        |                 | TIA            | < 5      | < 5       | < 5      | < 5     |
|        |                 | MI             | < 5      | < 5       | < 5      | < 5     |
|        |                 | HF             | < 5      | < 5       | < 5      | < 5     |
|        |                 | HS             | < 5      | < 5       | < 5      | < 5     |
|        |                 | MP             | < 5      | < 5       | < 5      | < 5     |

VTE = Venous thromboembolism (DVT + PE), DVT = Deep vein thrombosis, PE = Pulmonary embolism, ATE = Arterial thrombosis/thromboembolism (IS + TIA + MI), IS = Ischemic stroke, TIA = Transient ischemic attack, MI = Myocardial infarction, HF = Heart failure, HS = Hemorrhagic stroke, MP = Myocarditis or Pericarditis

**Figure S6: Forest plots for vaccine effect (any COVID-19 vaccine), meta-analysis across cohorts and databases. Follow-up ends at first vaccine dose after index date. Dashed line represents a level of heterogeneity  $I^2 > 0.4$ .**

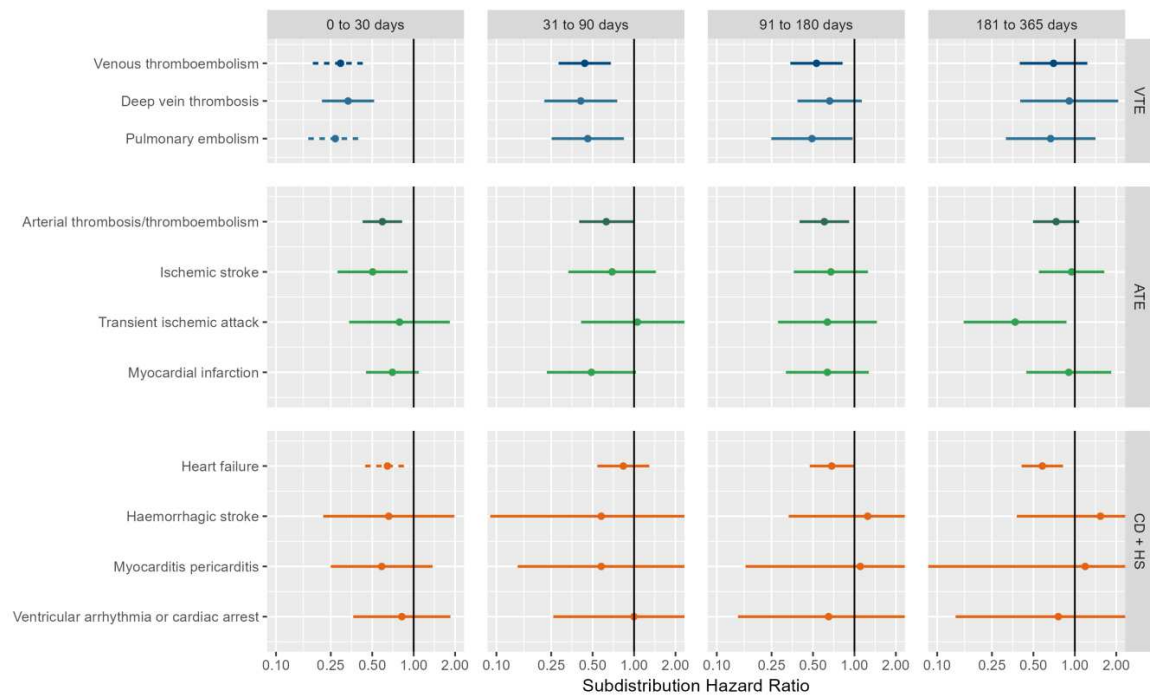

VTE = Venous thromboembolism, ATE = Arterial thrombosis/thromboembolism, CD + HS = Cardiac diseases and Hemorrhagic stroke

**Figure S7: Forest plots for vaccine effect (any COVID-19 vaccine), meta-analysis across cohorts and databases. Only first outcome after COVID-19 captured. Dashed line represents a level of heterogeneity  $I^2 > 0.4$ .**

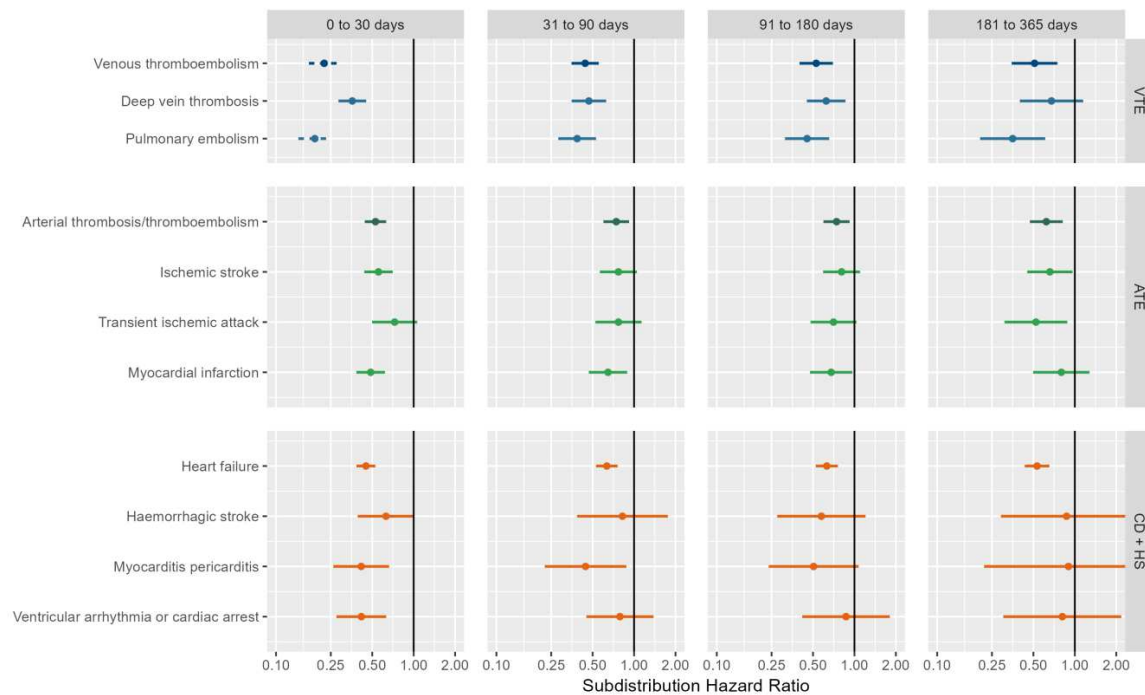

VTE = Venous thromboembolism, ATE = Arterial thrombosis/thromboembolism, CD + HS = Cardiac diseases and Hemorrhagic stroke

**Figure S8: Forest plots for vaccine effect (ChAdOx1 vaccine), meta-analysis across cohorts and databases.** Dashed line represents a level of heterogeneity  $I^2 > 0.4$ .

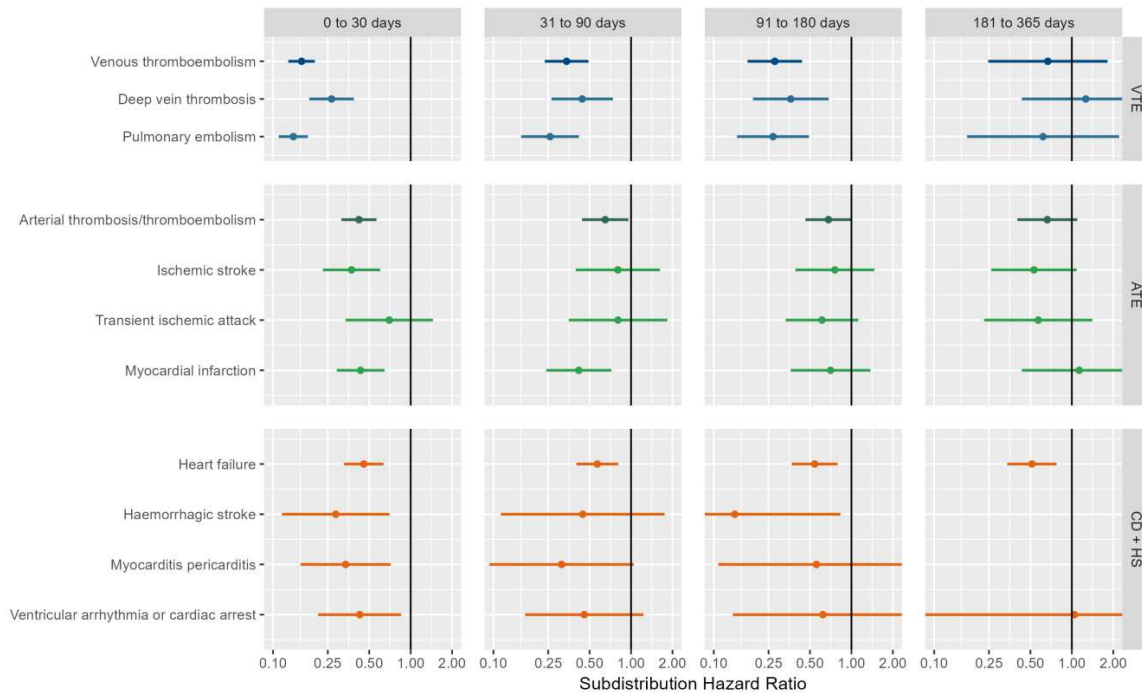

VTE = Venous thromboembolism, ATE = Arterial thrombosis/thromboembolism, CD + HS = Cardiac diseases and Hemorrhagic stroke

**Figure S9: Forest plots for vaccine effect (ChAdOx1 vaccine), meta-analysis across cohorts and databases.** Follow-up ends at first vaccine dose after index date. Dashed line represents a level of heterogeneity  $I^2 > 0.4$ .

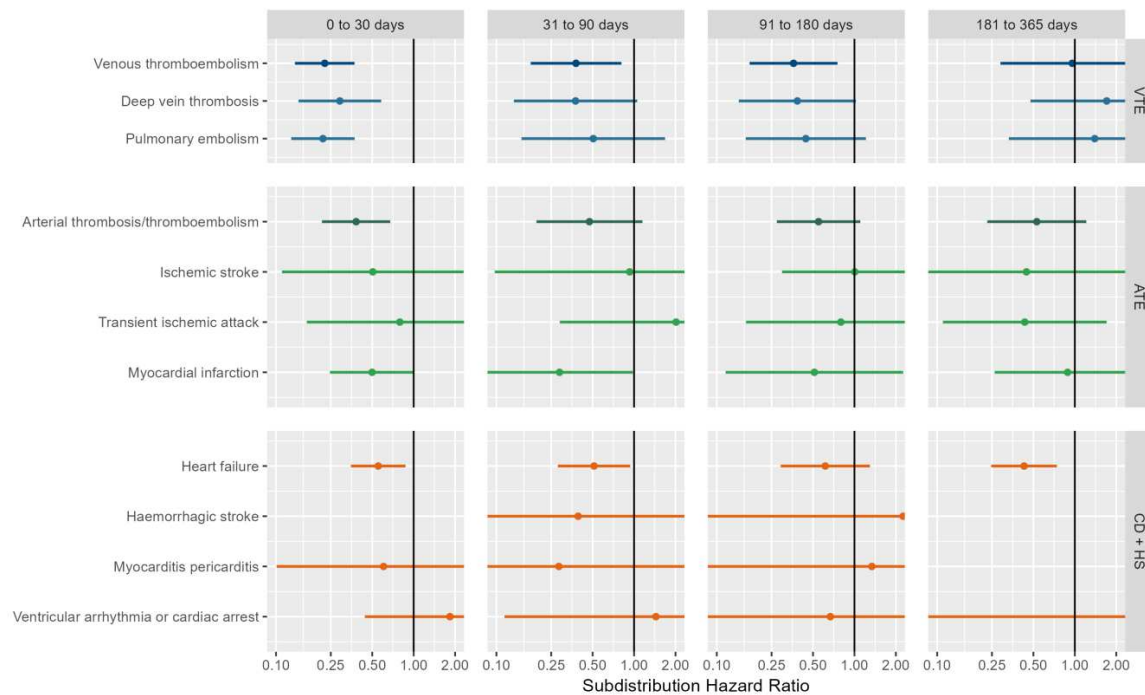

VTE = Venous thromboembolism, ATE = Arterial thrombosis/thromboembolism, CD + HS = Cardiac diseases and Hemorrhagic stroke

**Figure S10: Forest plots for vaccine effect (ChAdOx1 vaccine), meta-analysis across cohorts and databases.** Only first outcome after COVID-19 captured. Dashed line represents a level of heterogeneity  $I^2 > 0.4$ .

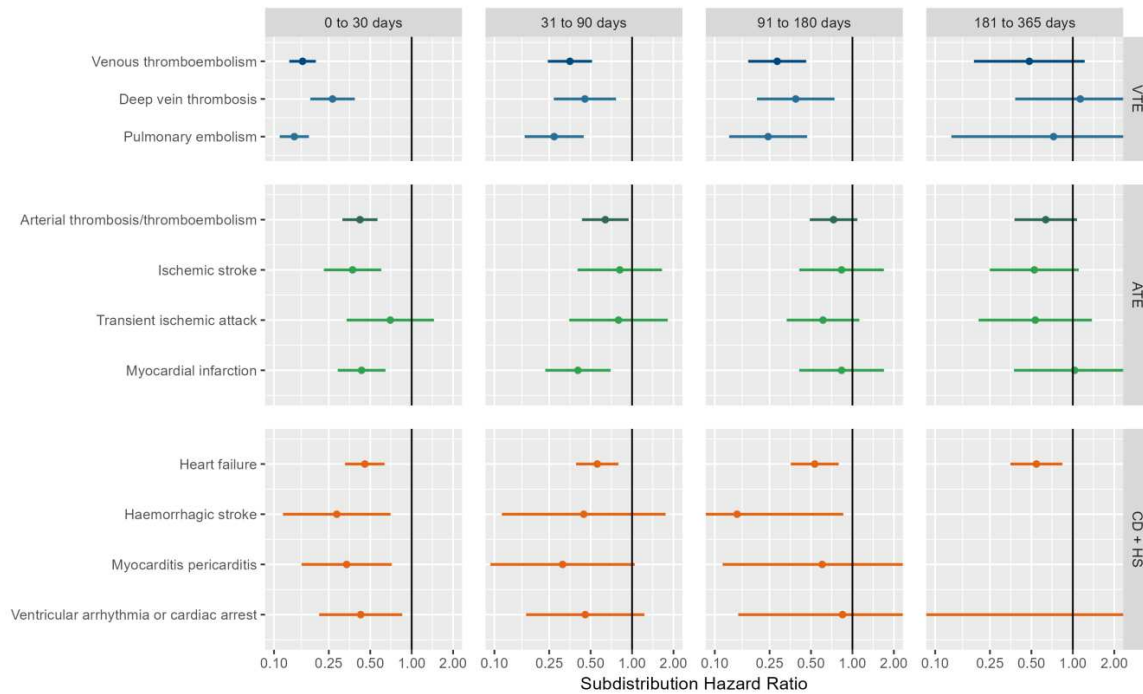

VTE = Venous thromboembolism, ATE = Arterial thrombosis/thromboembolism, CD + HS = Cardiac diseases and Hemorrhagic stroke



**Figure S11: Forest plots for vaccine effect (BNT162b2 vaccine), meta-analysis across cohorts and databases.** Dashed line represents a level of heterogeneity  $I^2 > 0.4$ .

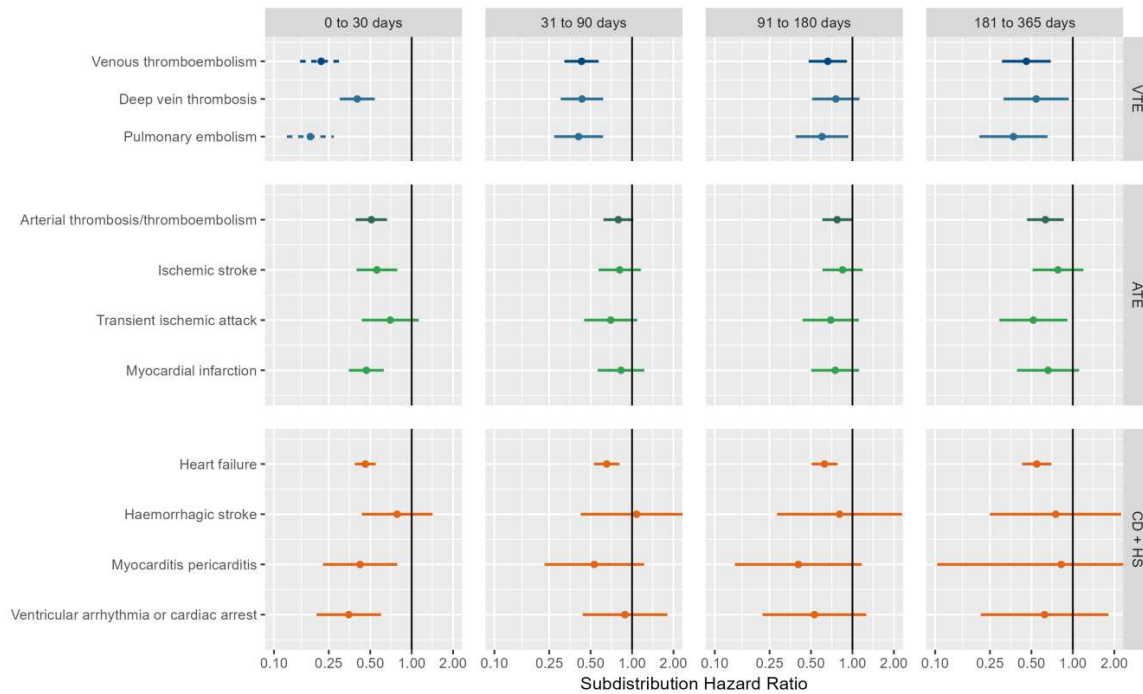

VTE = Venous thromboembolism, ATE = Arterial thrombosis/thromboembolism, CD + HS = Cardiac diseases and Hemorrhagic stroke

**Figure S12: Forest plots for vaccine effect (BNT162b2 vaccine), meta-analysis across cohorts and databases.** Follow-up ends at first vaccine dose after index date. Dashed line represents a level of heterogeneity  $I^2 > 0.4$ .

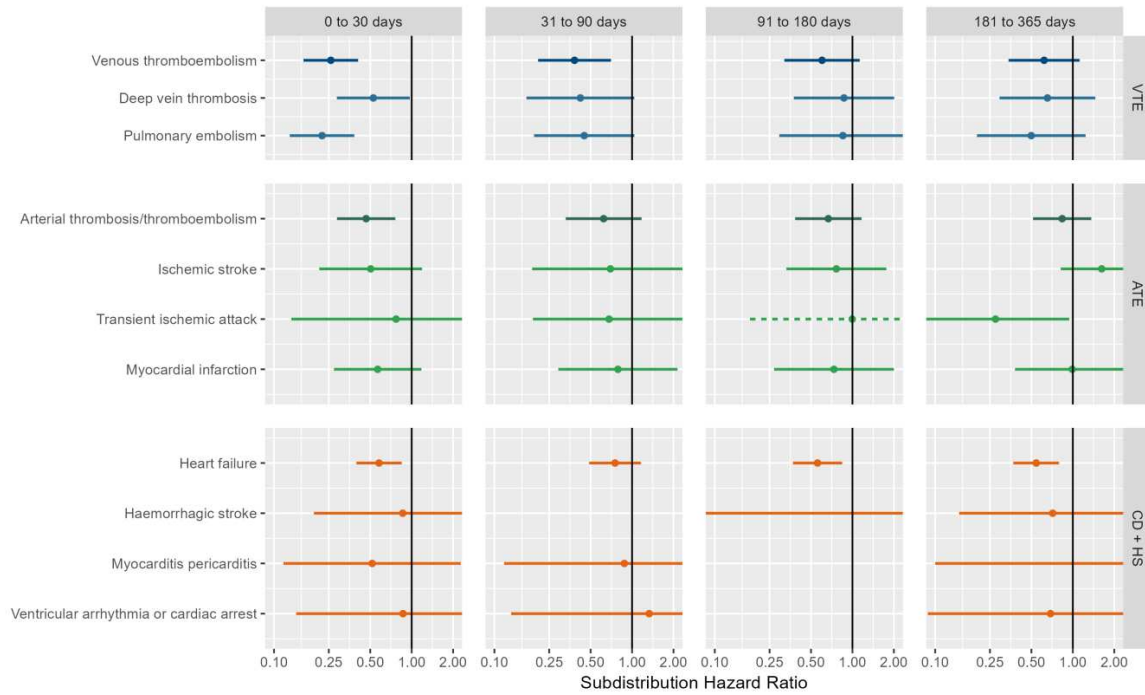

VTE = Venous thromboembolism, ATE = Arterial thrombosis/thromboembolism, CD + HS = Cardiac diseases and Hemorrhagic stroke

**Figure S13: Forest plots for vaccine effect (BNT162b2 vaccine), meta-analysis across cohorts and databases.** Only first outcome after COVID-19 captured. Dashed line represents a level of heterogeneity  $I^2 > 0.4$ .

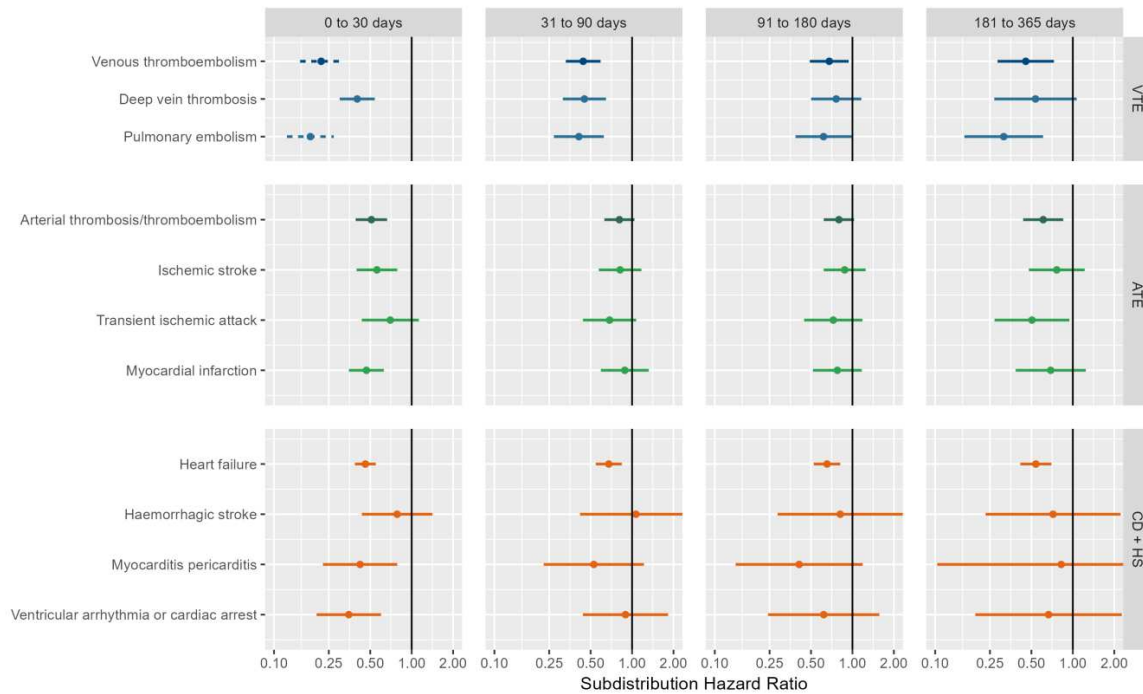

VTE = Venous thromboembolism, ATE = Arterial thrombosis/thromboembolism, CD + HS = Cardiac diseases and Hemorrhagic stroke

**Figure S14: Forest plots for vaccine effect (any COVID-19 vaccine) on preventing venous thromboembolism complications, for each cohort and database (meta-analysis estimates across cohorts in the last panel).** Dashed line represents a level of heterogeneity  $I^2 > 0.4$ .

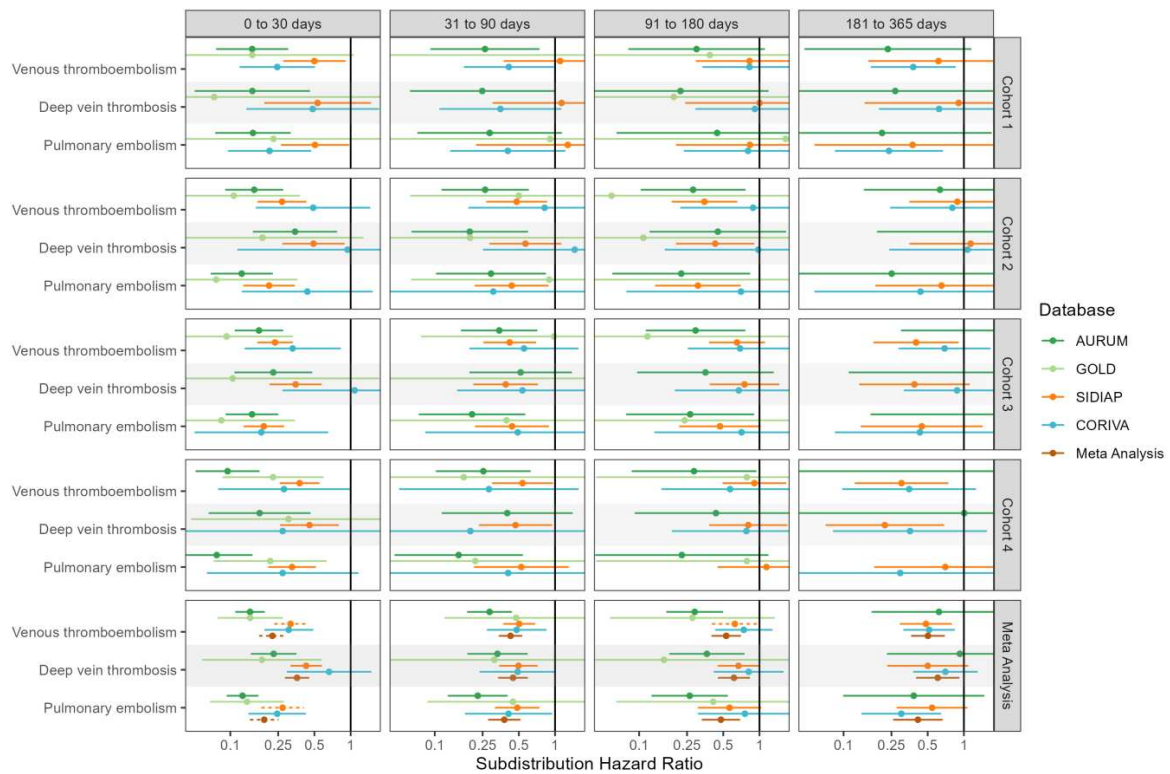

**Figure S15: Forest plots for vaccine effect (any COVID-19 vaccine) on preventing venous thromboembolism complications, for each cohort and database (meta-analysis estimates across cohorts in the last panel). Follow-up ends at first vaccine dose after index date. Dashed line represents a level of heterogeneity  $I^2 > 0.4$ .**

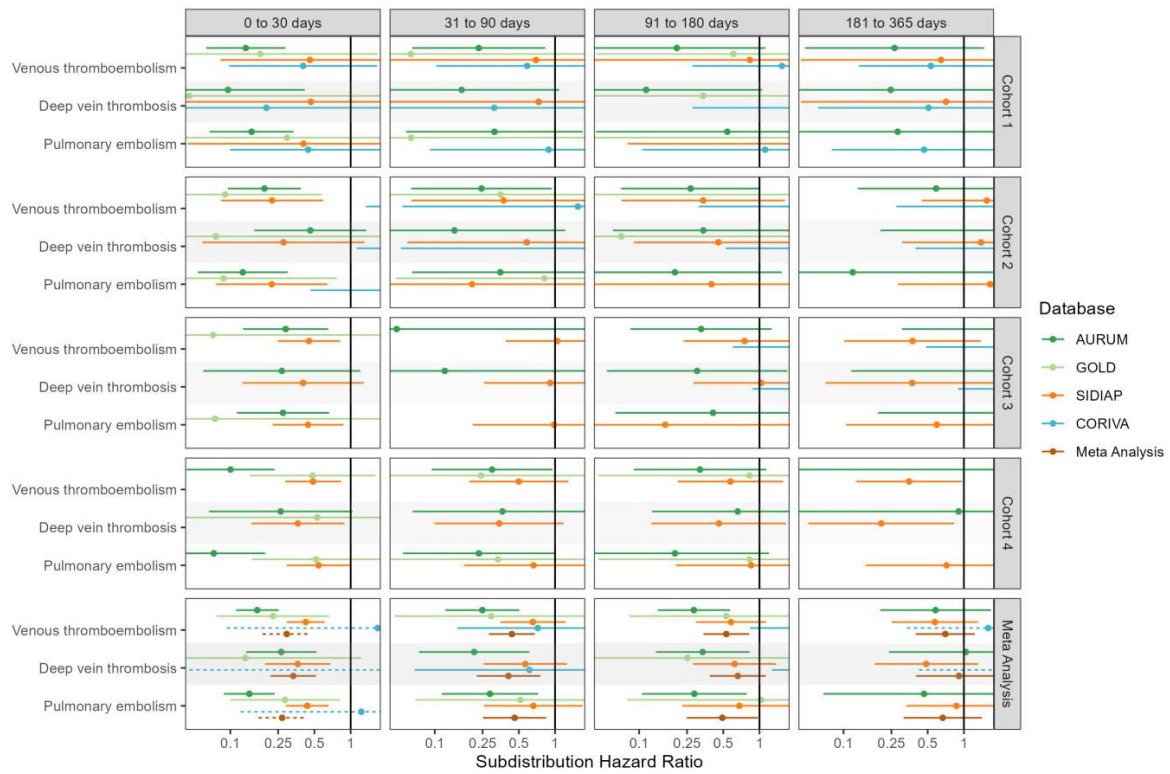

**Figure S16: Forest plots for vaccine effect (any COVID-19 vaccine) on preventing venous thromboembolism complications, for each cohort and database (meta-analysis estimates across cohorts in the last panel). Only first outcome after COVID-19 captured. Dashed line represents a level of heterogeneity  $I^2 > 0.4$ .**

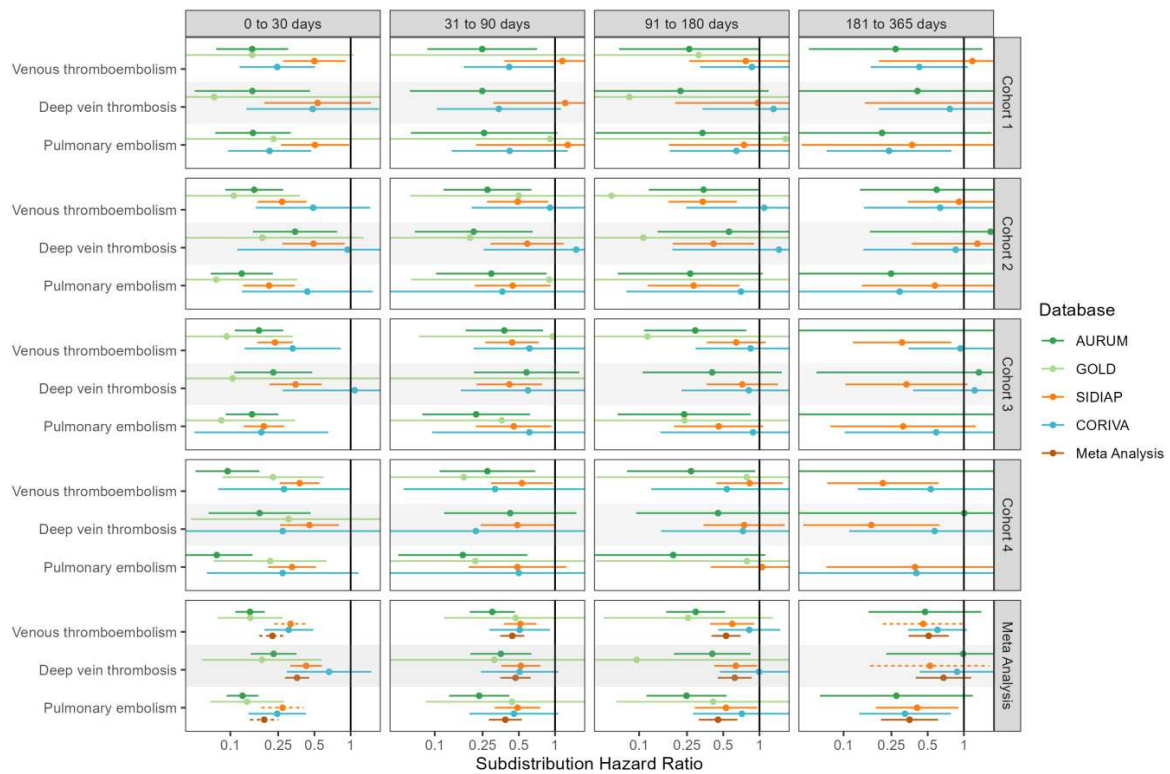

**Figure S17: Forest plots for vaccine effect (ChAdOx1 vaccine) on preventing venous thromboembolism complications, for each cohort and database (meta-analysis estimates across cohorts in the last panel). Dashed line represents a level of heterogeneity  $I^2 > 0.4$ .**

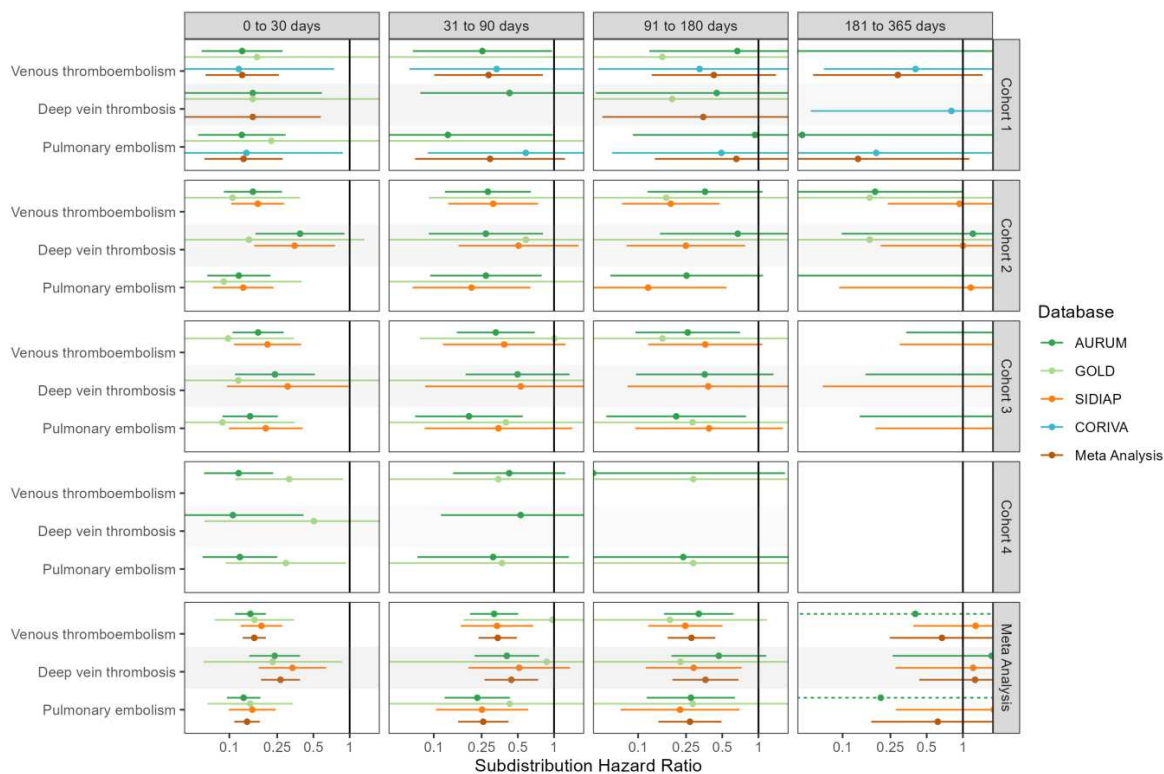

**Figure S18: Forest plots for vaccine effect (ChAdOx1 vaccine) on preventing venous thromboembolism complications, for each cohort and database (meta-analysis estimates across cohorts in the last panel). Follow-up ends at first vaccine dose after index date. Dashed line represents a level of heterogeneity  $I^2 > 0.4$ .**

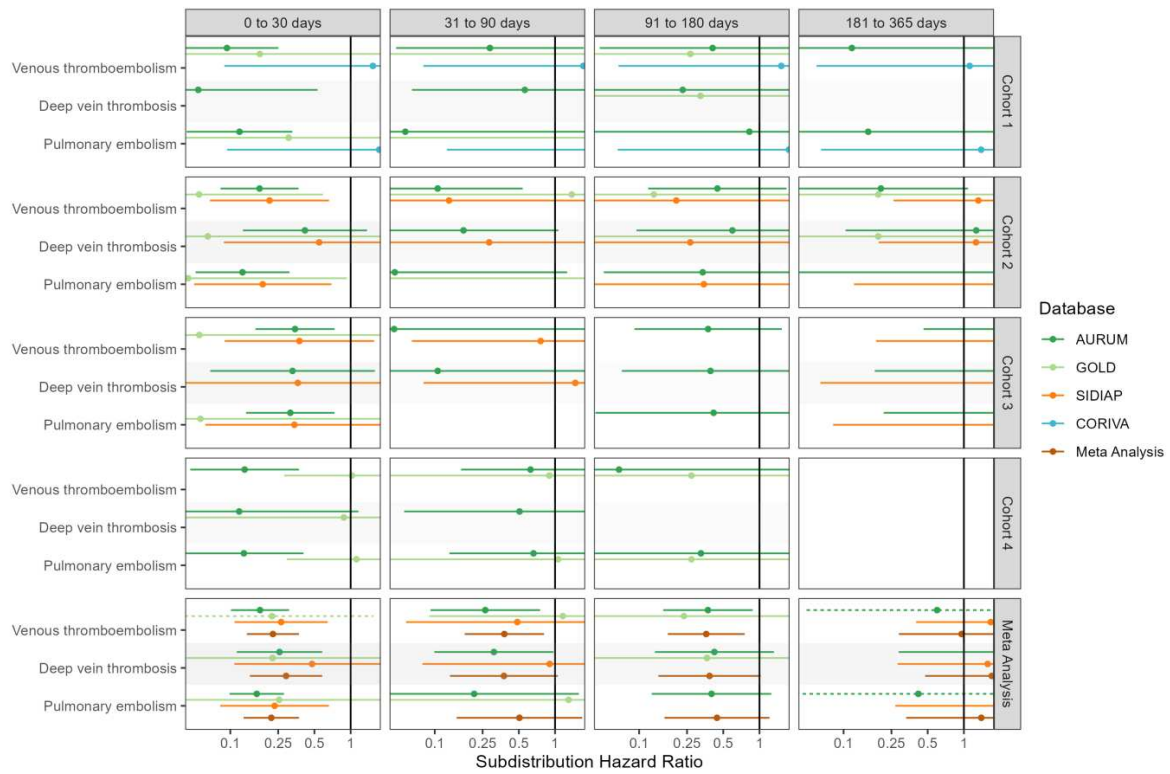



**Figure S19: Forest plots for vaccine effect (ChAdOx1 vaccine) on preventing venous thromboembolism complications, for each cohort and database (meta-analysis estimates across cohorts in the last panel). Only first outcome after COVID-19 captured. Dashed line represents a level of heterogeneity  $I^2 > 0.4$ .**

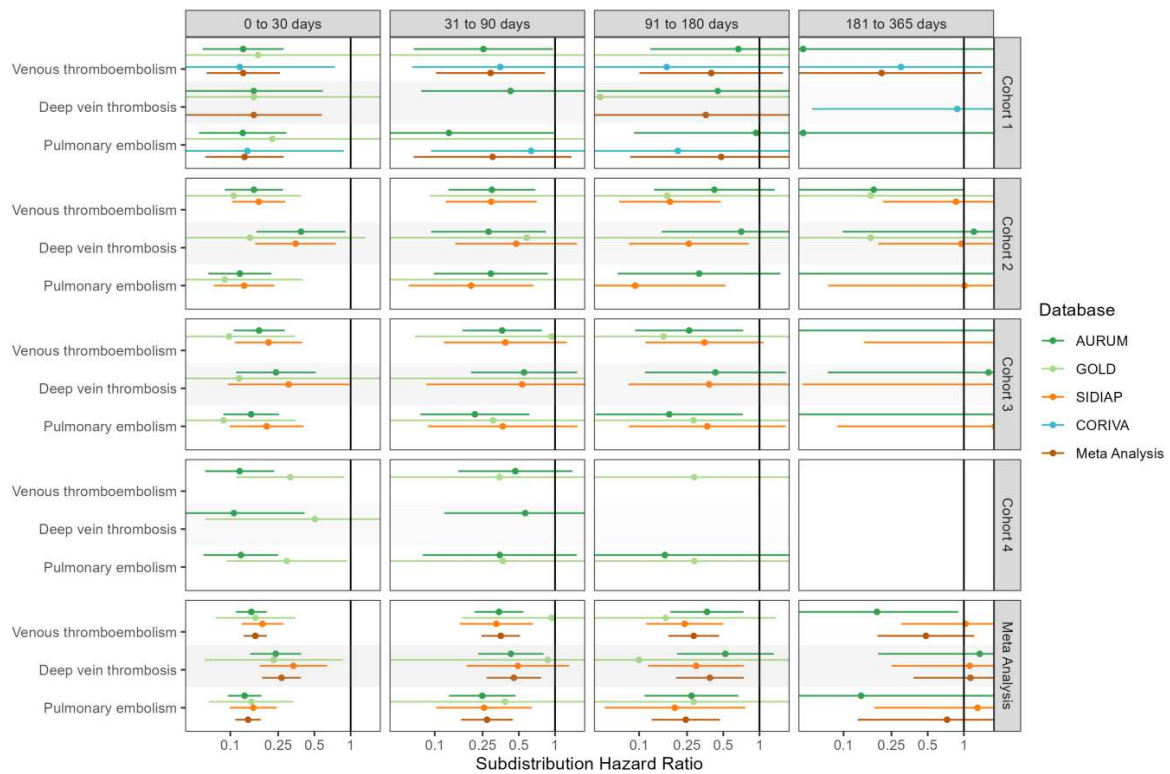

**Figure S20: Forest plots for vaccine effect (BNT162b2 vaccine) on preventing venous thromboembolism complications, for each cohort and database (meta-analysis estimates across cohorts in the last panel). Dashed line represents a level of heterogeneity  $I^2 > 0.4$ .**

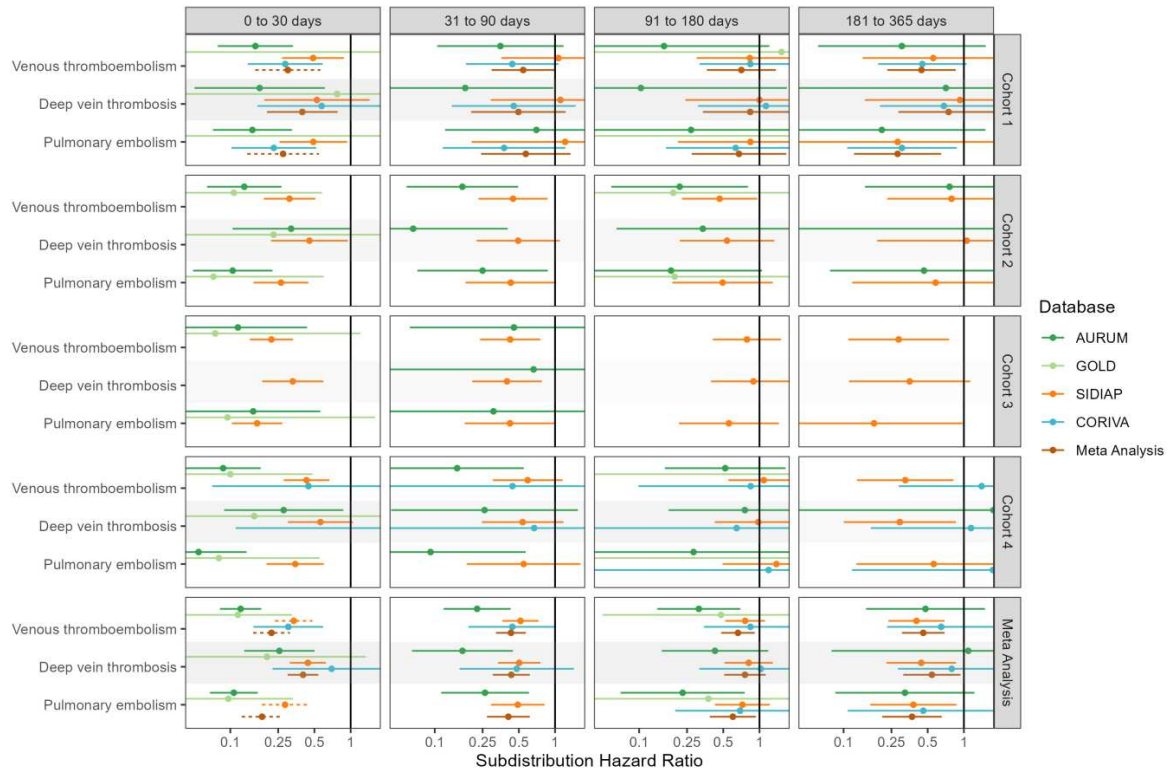

**Figure S21: Forest plots for vaccine effect (BNT162b2 vaccine) on preventing venous thromboembolism complications, for each cohort and database (meta-analysis estimates across cohorts in the last panel). Follow-up ends at first vaccine dose after index date. Dashed line represents a level of heterogeneity  $I^2 > 0.4$ .**

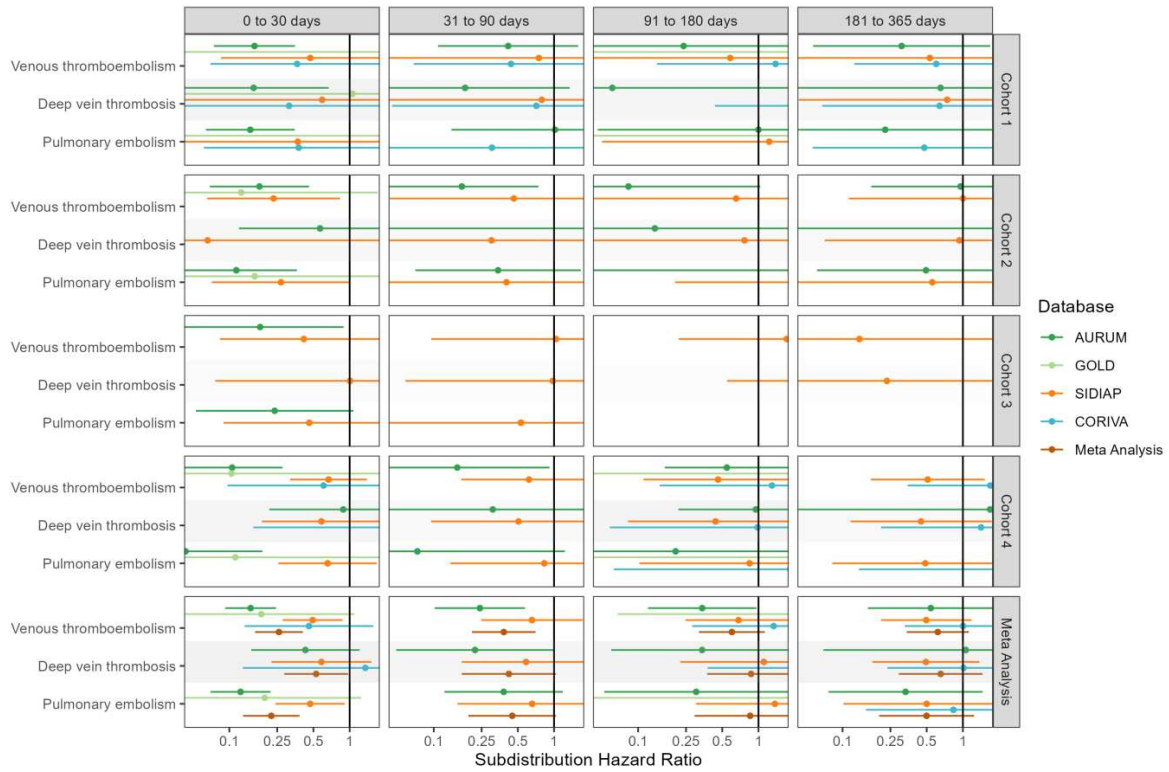

**Figure S22: Forest plots for vaccine effect (BNT162b2 vaccine) on preventing venous thromboembolism complications, for each cohort and database (meta-analysis estimates across cohorts in the last panel). Only first outcome after COVID-19 captured. Dashed line represents a level of heterogeneity  $I^2 > 0.4$ .**

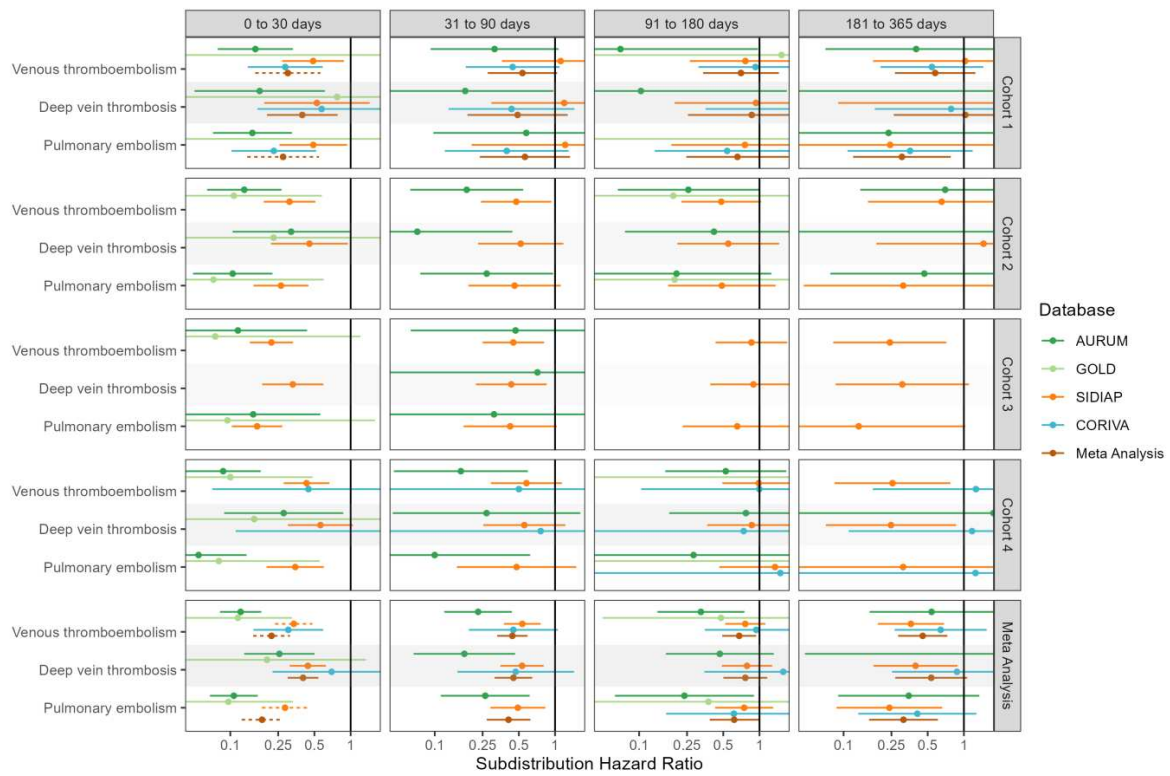

**Figure S23: Forest plots for vaccine effect (any COVID-19 vaccine) on preventing arterial thrombosis/thromboembolism complications, for each cohort and database (meta-analysis estimates across cohorts in the last panel). Dashed line represents a level of heterogeneity  $I^2 > 0.4$ .**

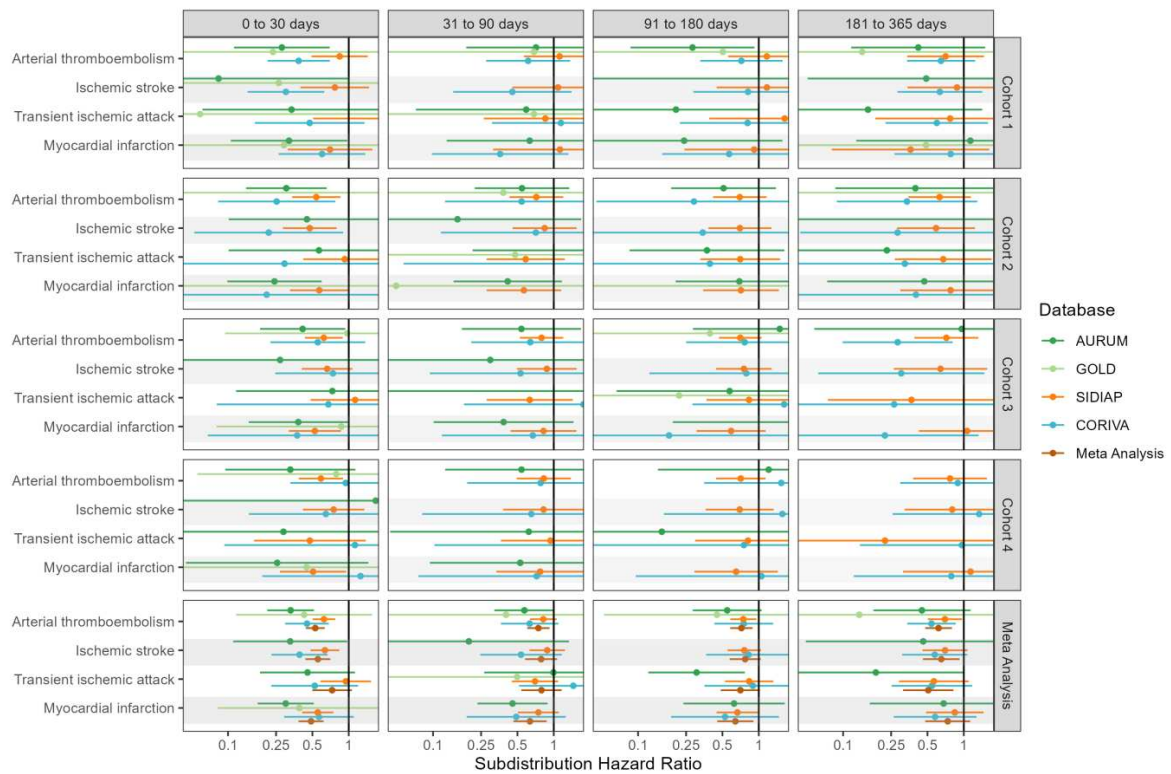

**Figure S24: Forest plots for vaccine effect (any COVID-19 vaccine) on preventing arterial thrombosis/thromboembolism complications, for each cohort and database (meta-analysis estimates across cohorts in the last panel). Follow-up ends at first vaccine dose after index date. Dashed line represents a level of heterogeneity  $I^2 > 0.4$ .**

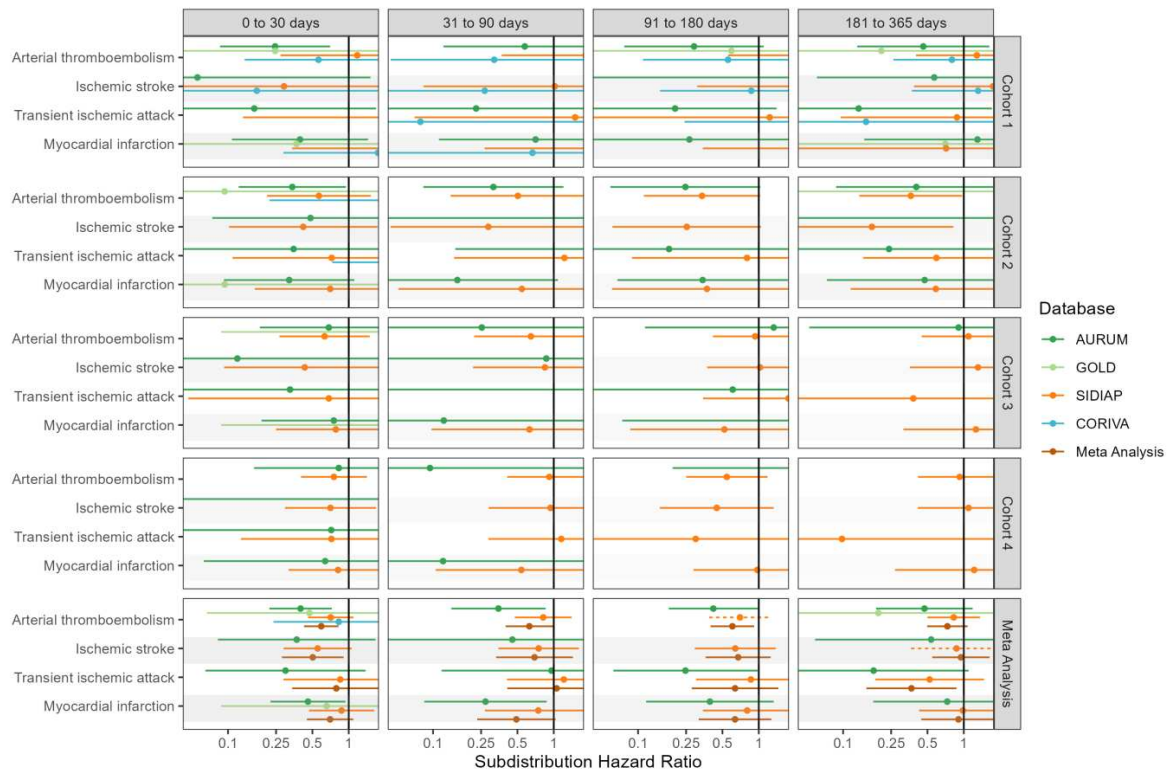

**Figure S25: Forest plots for vaccine effect (any COVID-19 vaccine) on preventing arterial thrombosis/thromboembolism complications, for each cohort and database (meta-analysis estimates across cohorts in the last panel). Only first outcome after COVID-19 captured. Dashed line represents a level of heterogeneity  $I^2 > 0.4$ .**

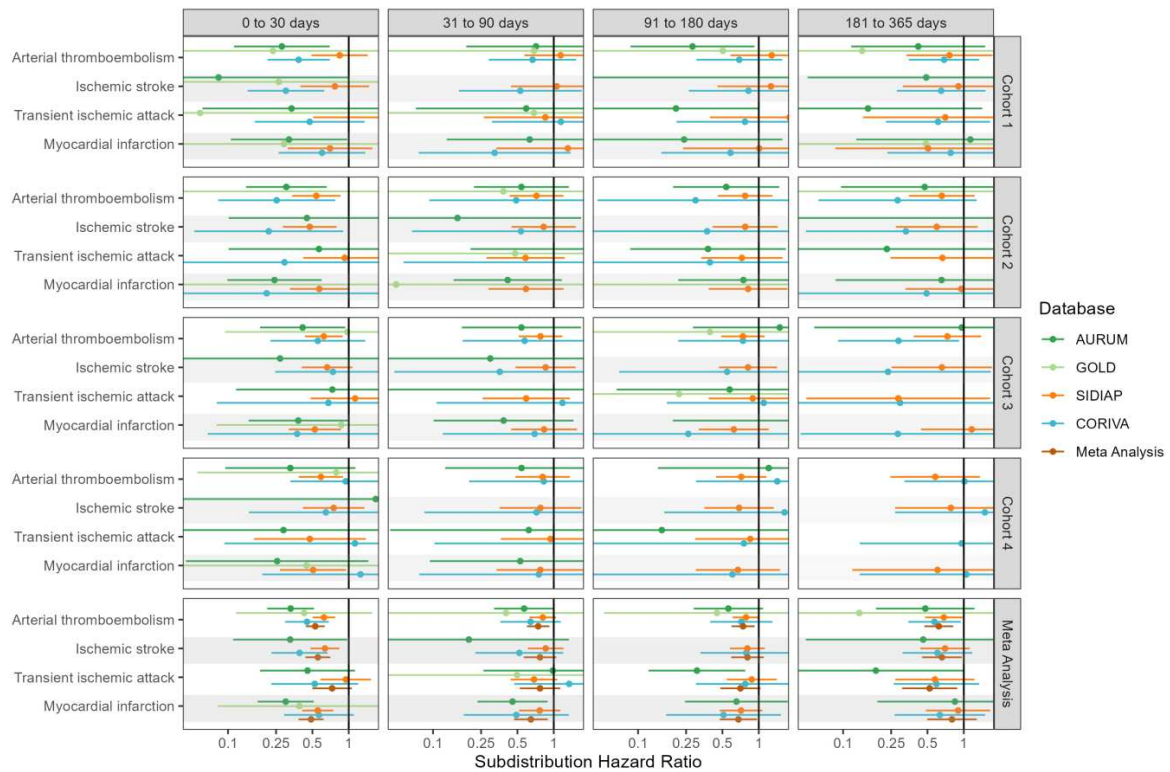

**Figure S26: Forest plots for vaccine effect (ChAdOx1 vaccine) on preventing arterial thrombosis/thromboembolism complications, for each cohort and database (meta-analysis estimates across cohorts in the last panel). Dashed line represents a level of heterogeneity  $I^2 > 0.4$ .**

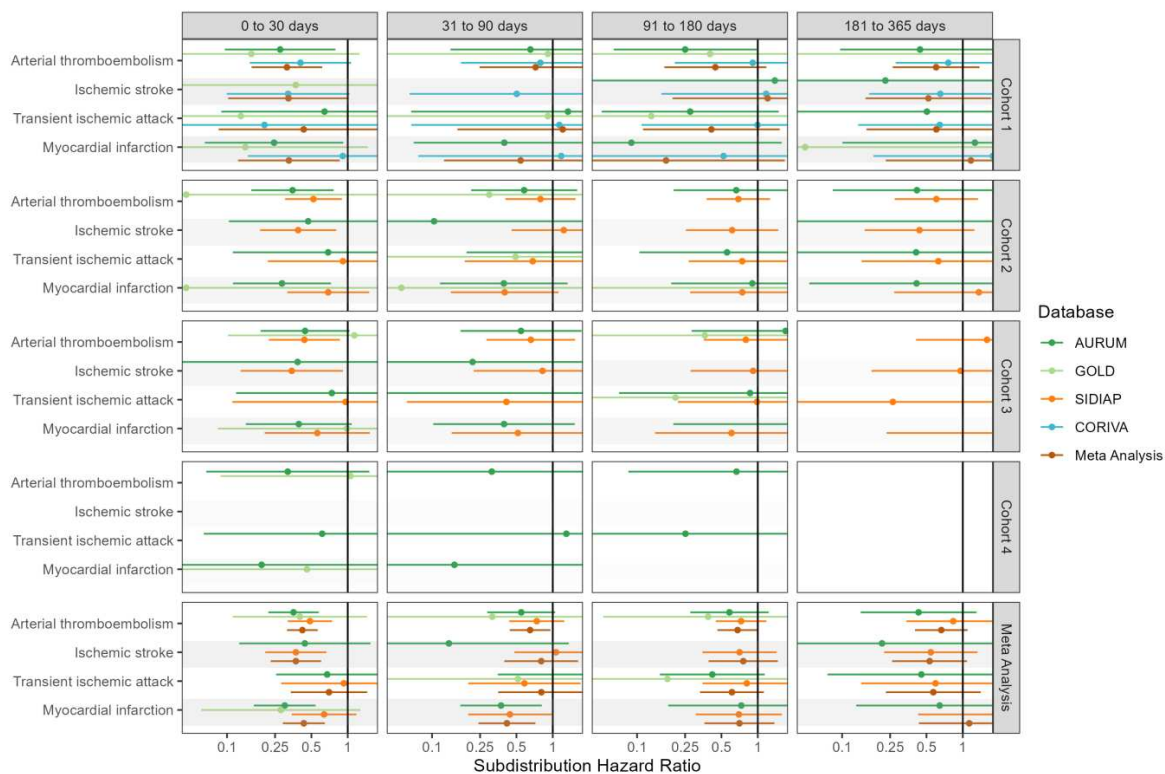



**Figure S27: Forest plots for vaccine effect (ChAdOx1 vaccine) on preventing arterial thrombosis/thromboembolism complications, for each cohort and database (meta-analysis estimates across cohorts in the last panel). Follow-up ends at first vaccine dose after index date. Dashed line represents a level of heterogeneity  $I^2 > 0.4$ .**

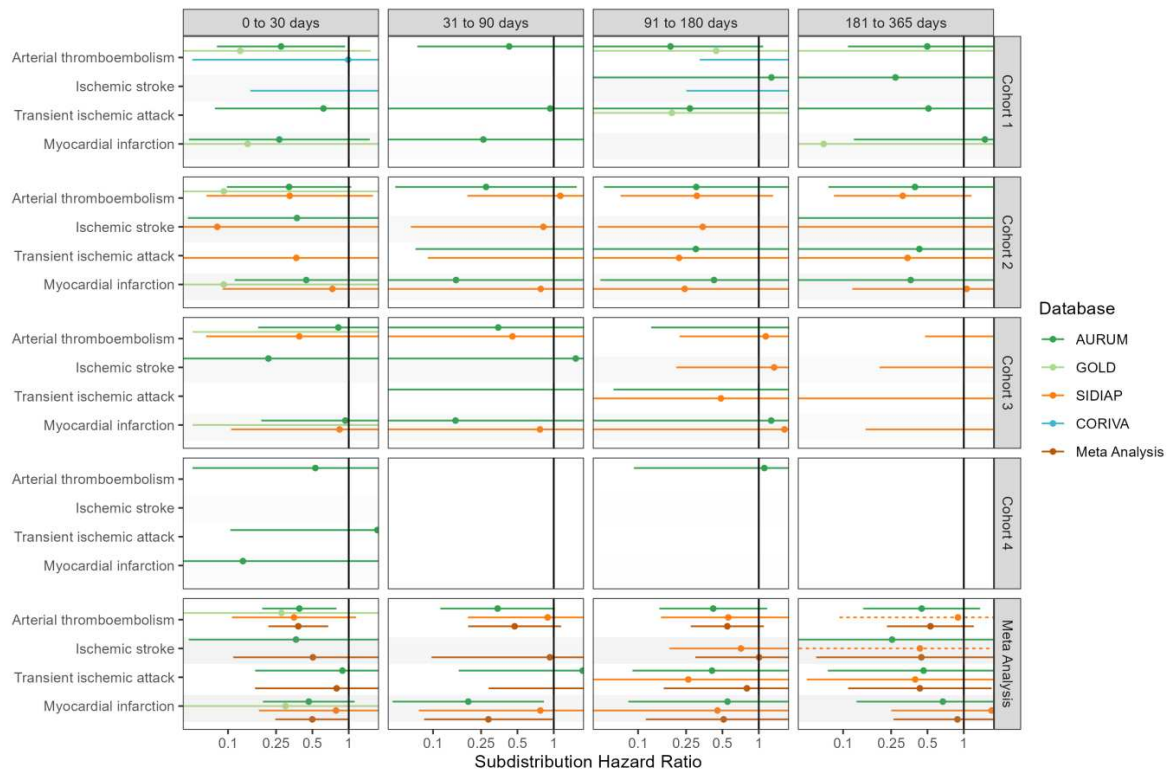

**Figure S28: Forest plots for vaccine effect (ChAdOx1 vaccine) on preventing arterial thrombosis/thromboembolism complications, for each cohort and database (meta-analysis estimates across cohorts in the last panel). Only first outcome after COVID-19 captured. Dashed line represents a level of heterogeneity  $I^2 > 0.4$ .**

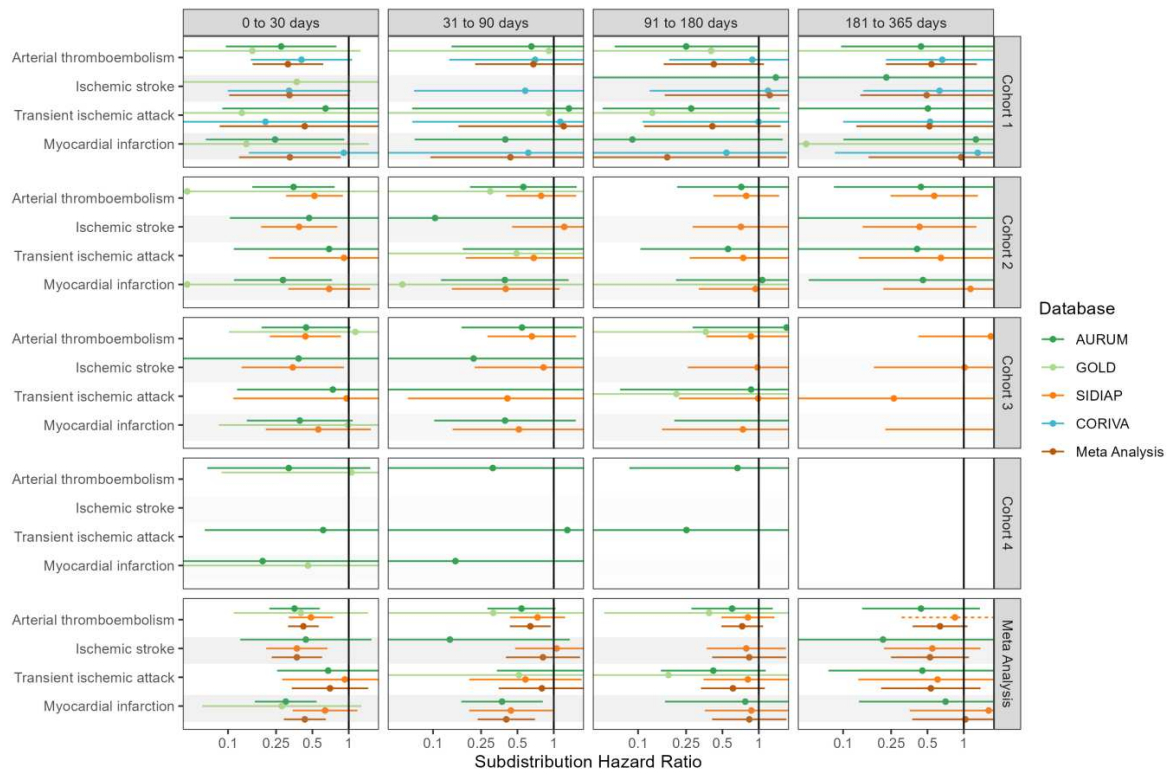

**Figure S29: Forest plots for vaccine effect (BNT162b2 vaccine) on preventing arterial thrombosis/thromboembolism complications, for each cohort and database (meta-analysis estimates across cohorts in the last panel). Dashed line represents a level of heterogeneity  $I^2 > 0.4$ .**

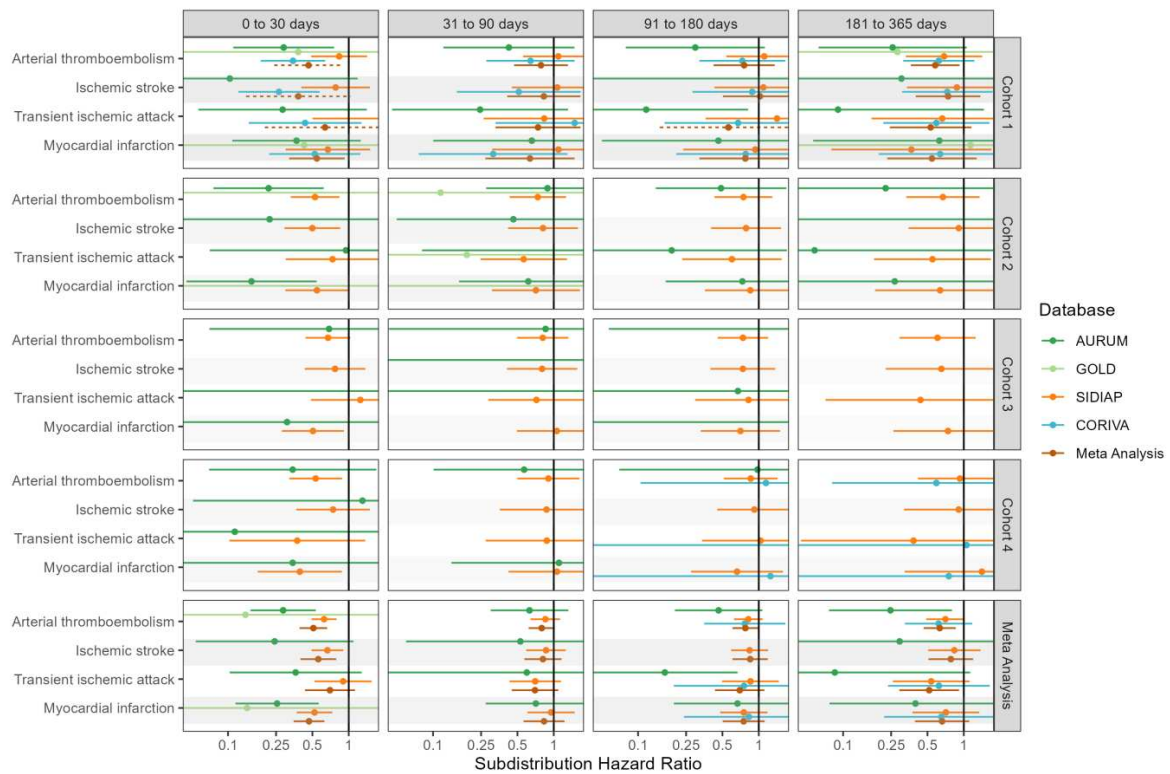

**Figure S30: Forest plots for vaccine effect (BNT162b2 vaccine) on preventing arterial thrombosis/thromboembolism complications, for each cohort and database (meta-analysis estimates across cohorts in the last panel). Follow-up ends at first vaccine dose after index date. Dashed line represents a level of heterogeneity  $I^2 > 0.4$ .**

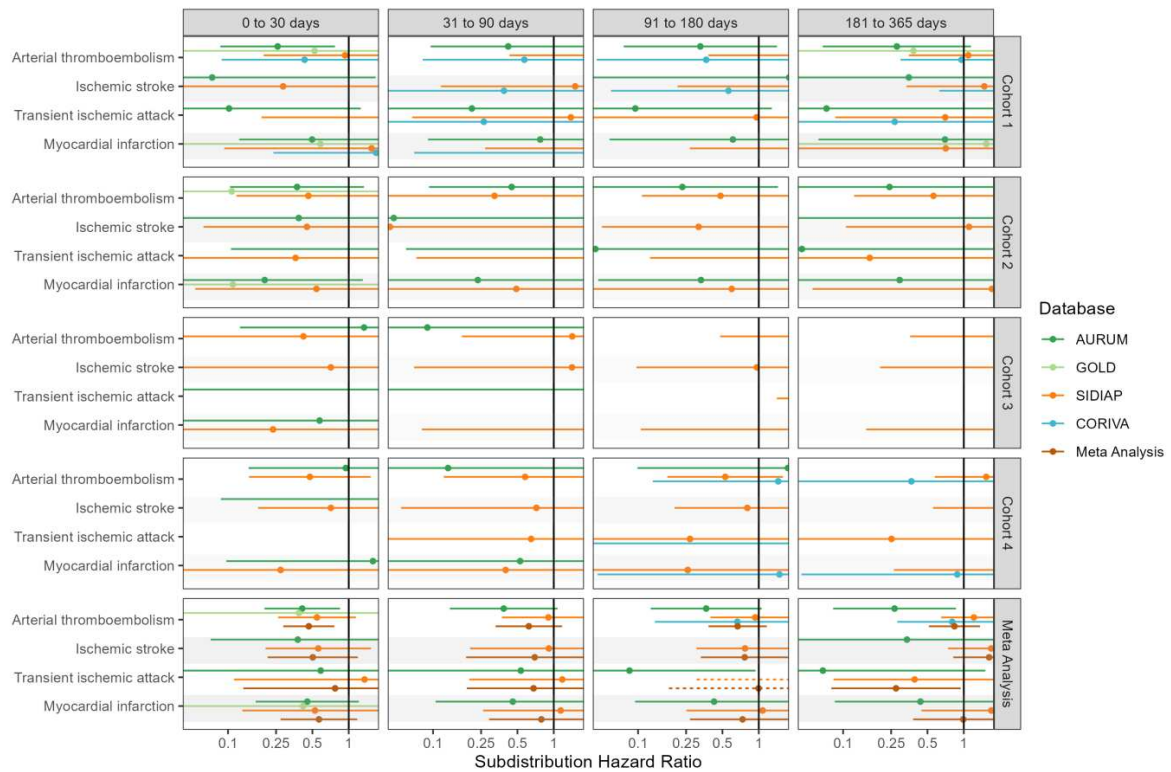

**Figure S31: Forest plots for vaccine effect (BNT162b2 vaccine) on preventing arterial thrombosis/thromboembolism complications, for each cohort and database (meta-analysis estimates across cohorts in the last panel). Only first outcome after COVID-19 captured. Dashed line represents a level of heterogeneity  $I^2 > 0.4$ .**

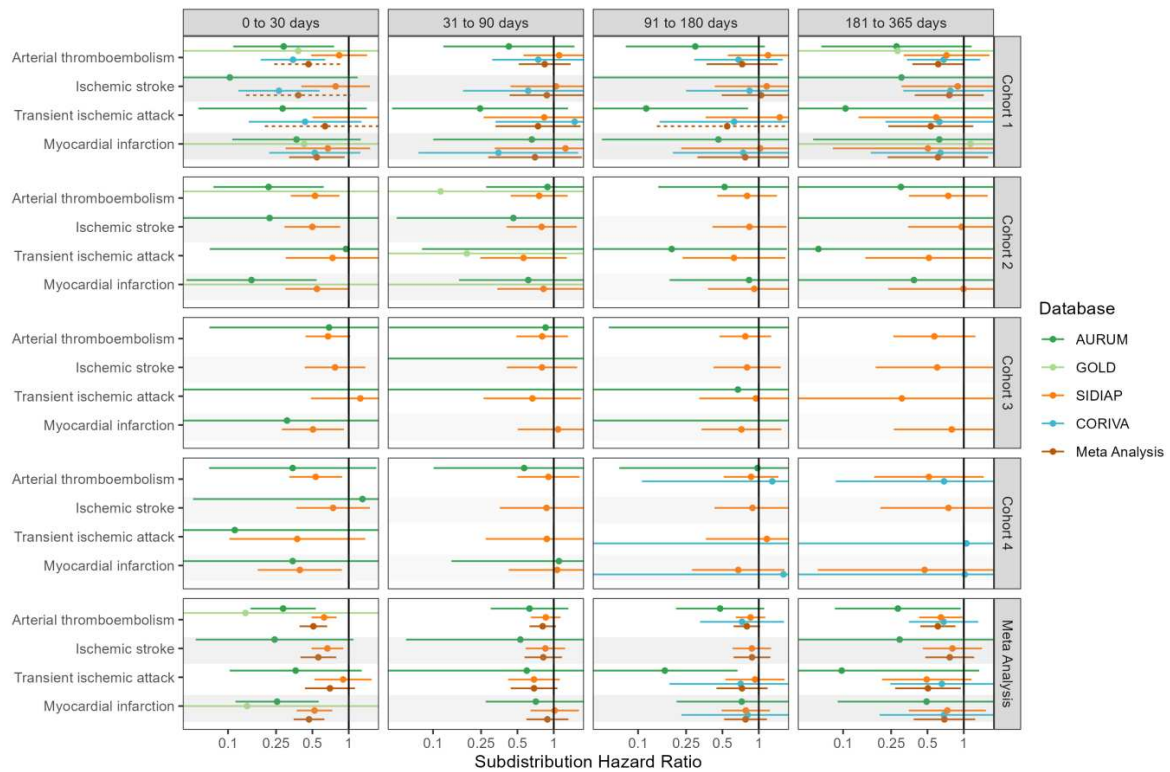

**Figure S32: Forest plots for vaccine effect (any COVID-19 vaccine) on preventing cardiac diseases and hemorrhagic stroke, for each cohort and database (meta-analysis estimates across cohorts in the last panel). Dashed line represents a level of heterogeneity  $I^2 > 0.4$ .**

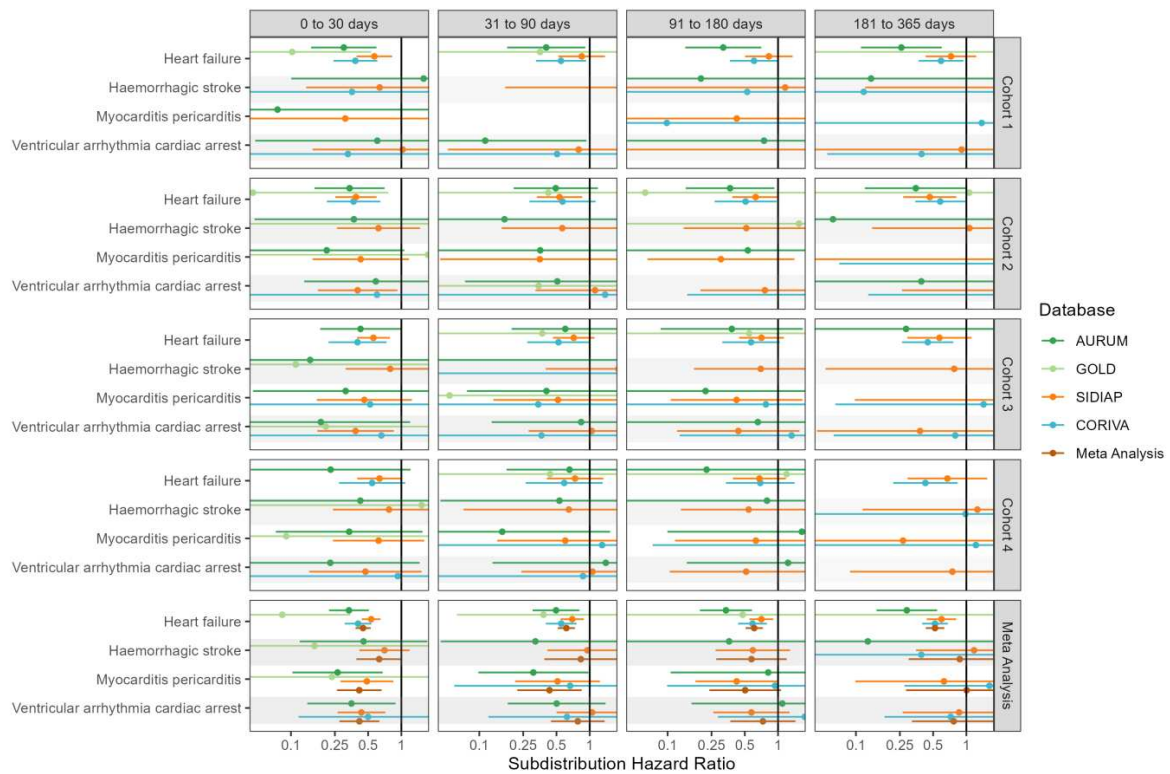

**Figure S33: Forest plots for vaccine effect (any COVID-19 vaccine) on preventing cardiac diseases and hemorrhagic stroke, for each cohort and database (meta-analysis estimates across cohorts in the last panel). Follow-up ends at first vaccine dose after index date. Dashed line represents a level of heterogeneity  $I^2 > 0.4$ .**

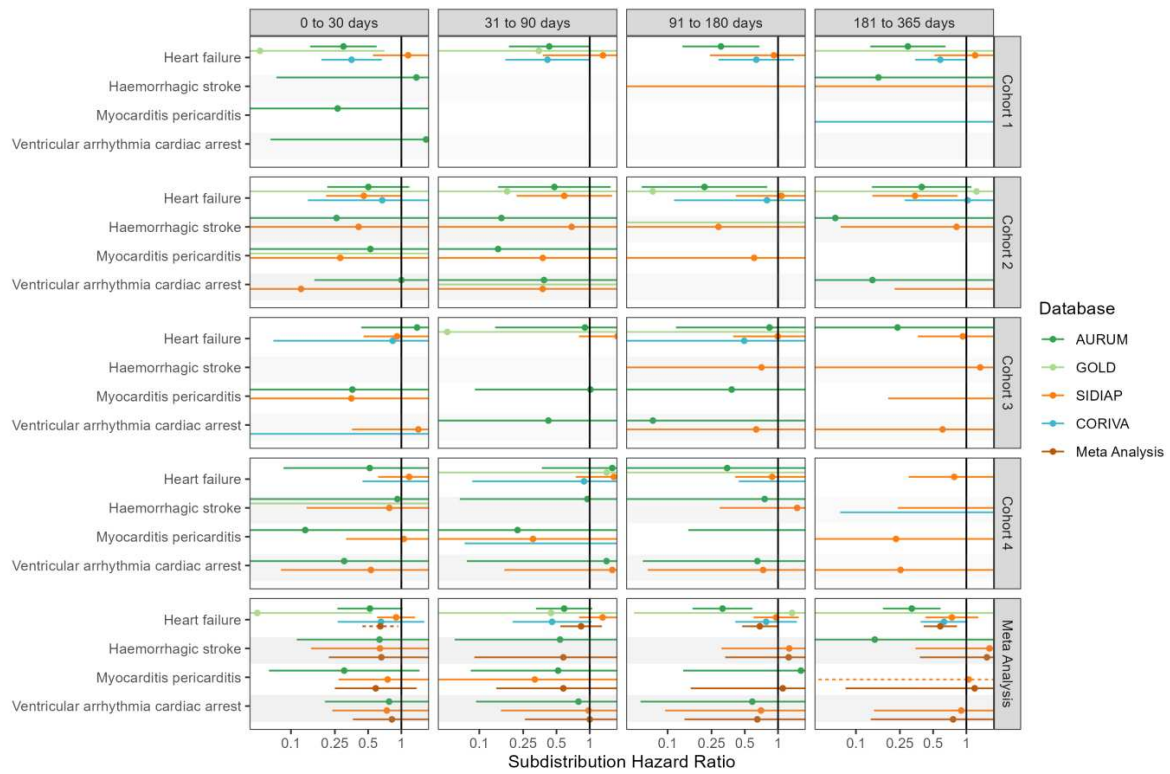

**Figure S34: Forest plots for vaccine effect (any COVID-19 vaccine) on preventing cardiac diseases and hemorrhagic stroke, for each cohort and database (meta-analysis estimates across cohorts in the last panel). Only first outcome after COVID-19 captured. Dashed line represents a level of heterogeneity  $I^2 > 0.4$ .**

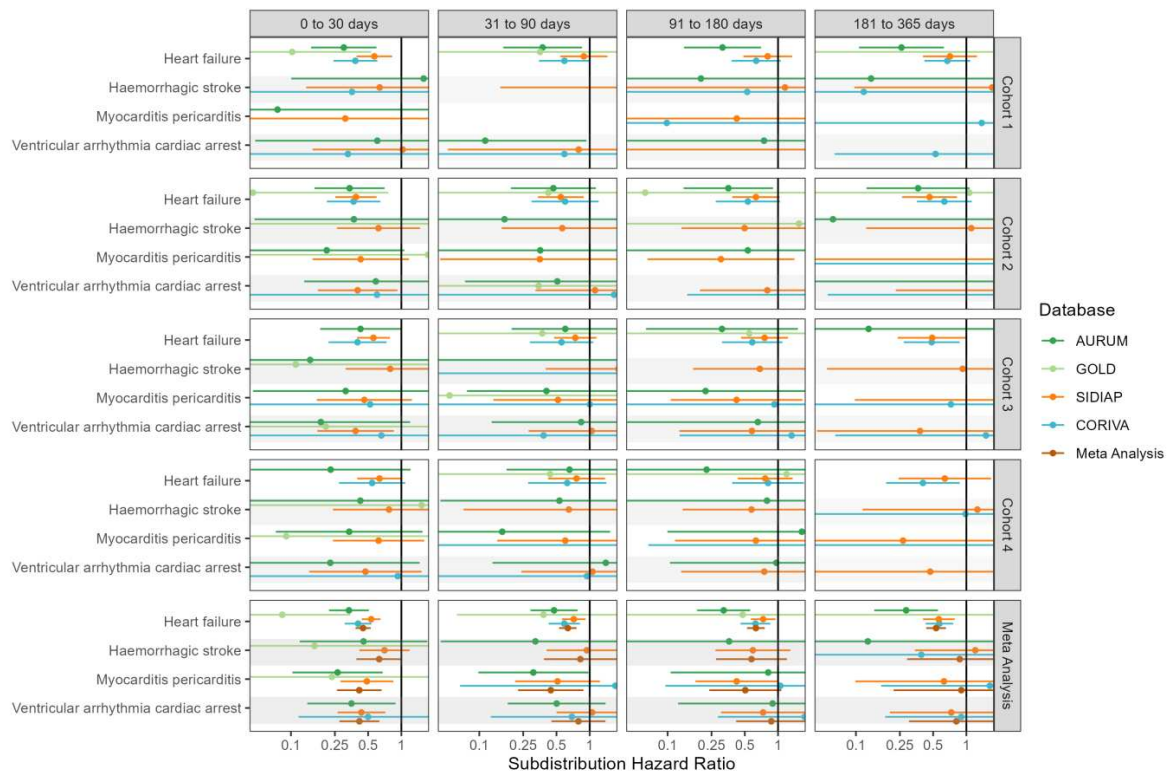



**Figure S35: Forest plots for vaccine effect (ChAdOx1 vaccine) on preventing cardiac diseases and hemorrhagic stroke, for each cohort and database (meta-analysis estimates across cohorts in the last panel). Dashed line represents a level of heterogeneity  $I^2 > 0.4$ .**

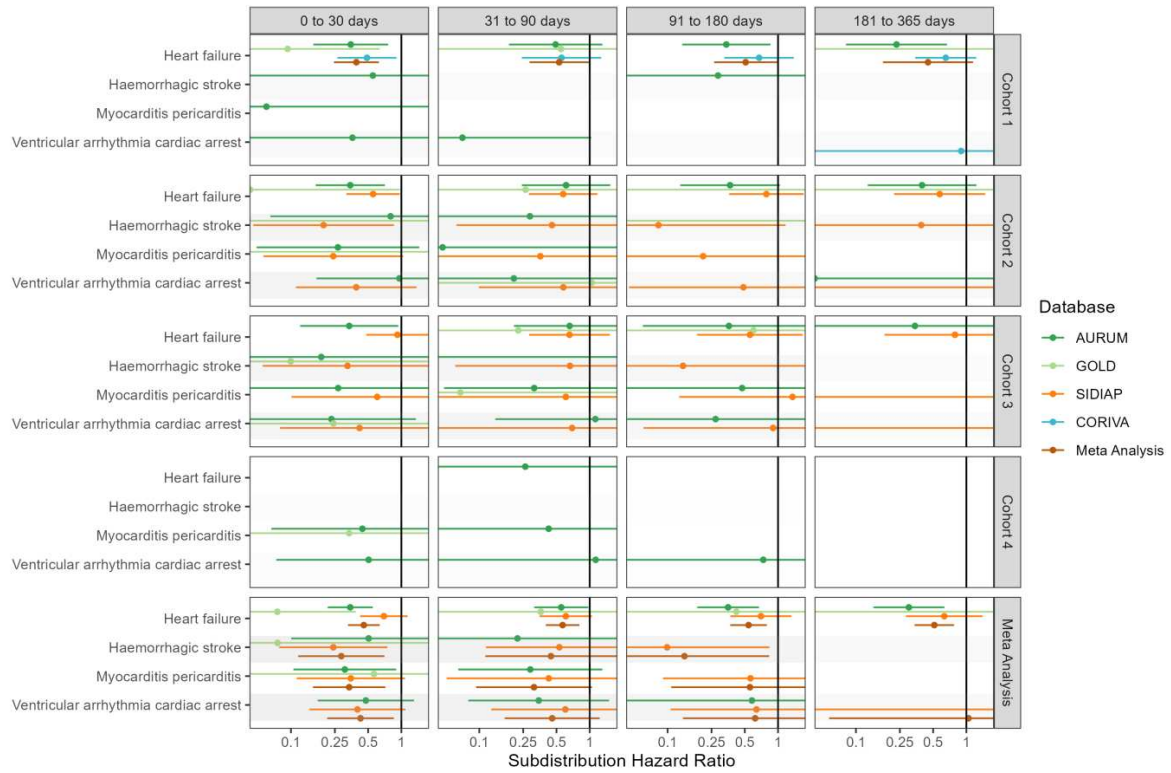

**Figure S36: Forest plots for vaccine effect (ChAdOx1 vaccine) on preventing cardiac diseases and hemorrhagic stroke, for each cohort and database (meta-analysis estimates across cohorts in the last panel). Follow-up ends at first vaccine dose after index date. Dashed line represents a level of heterogeneity  $I^2 > 0.4$ .**

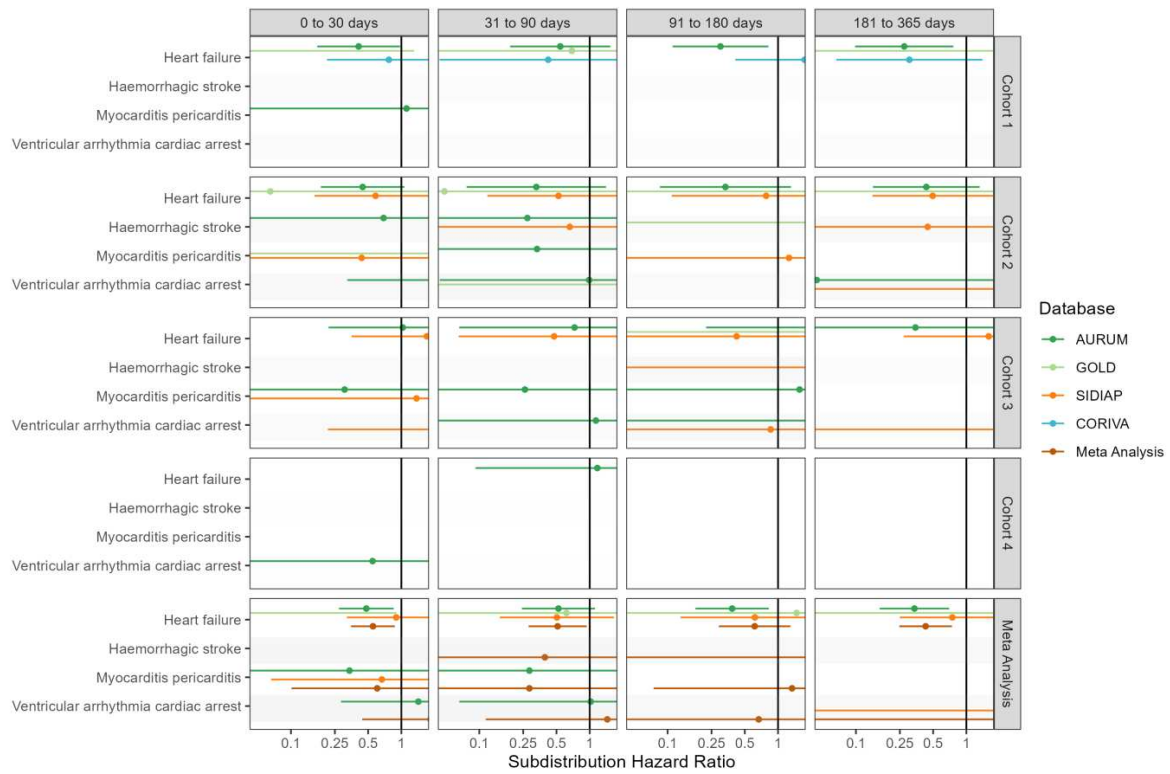

**Figure S37: Forest plots for vaccine effect (ChAdOx1 vaccine) on preventing cardiac diseases and hemorrhagic stroke, for each cohort and database (meta-analysis estimates across cohorts in the last panel). Only first outcome after COVID-19 captured. Dashed line represents a level of heterogeneity  $I^2 > 0.4$ .**

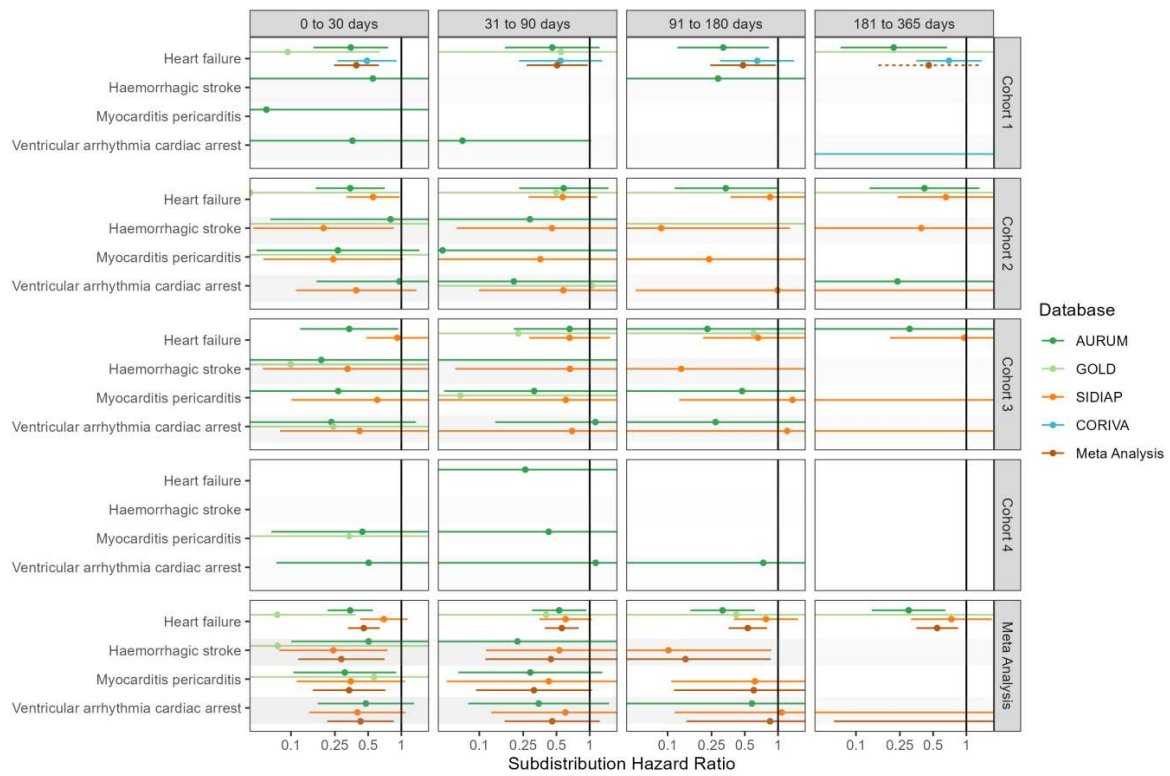

**Figure S38: Forest plots for vaccine effect (BNT162b2 vaccine) on preventing cardiac diseases and hemorrhagic stroke, for each cohort and database (meta-analysis estimates across cohorts in the last panel). Dashed line represents a level of heterogeneity  $I^2 > 0.4$ .**

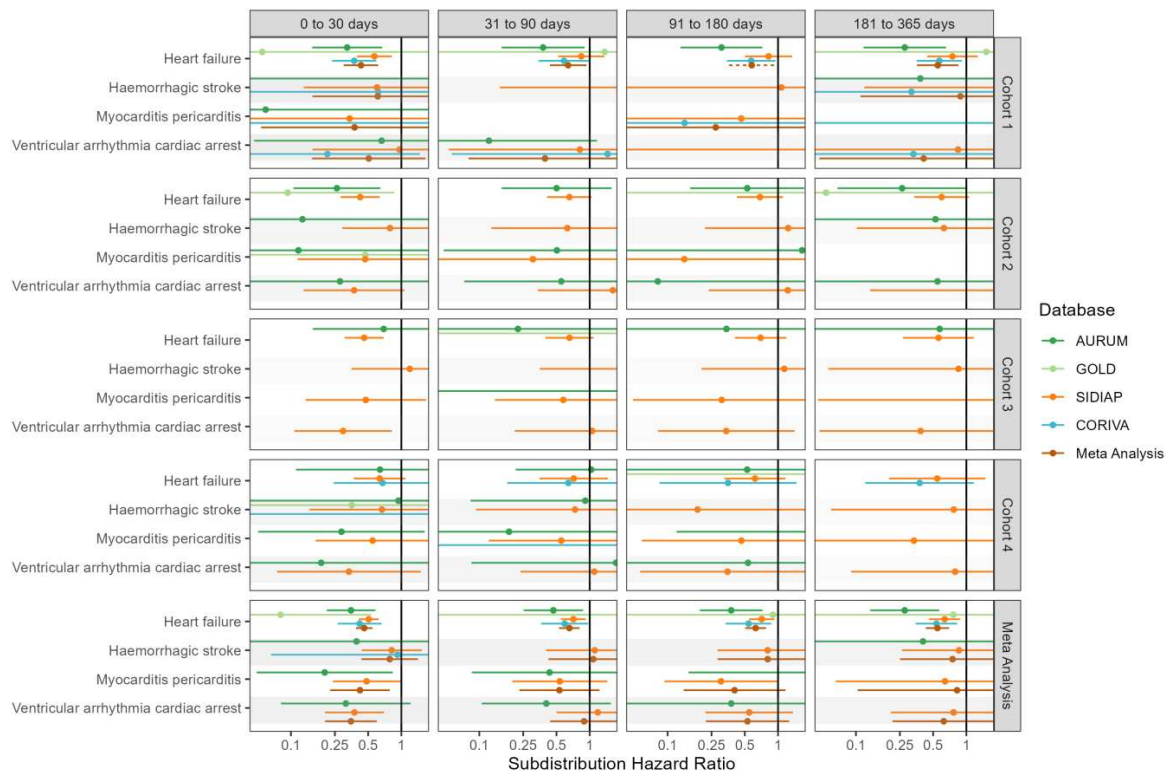

**Figure S39: Forest plots for vaccine effect (BNT162b2 vaccine) on preventing cardiac diseases and hemorrhagic stroke, for each cohort and database (meta-analysis estimates across cohorts in the last panel). Follow-up ends at first vaccine dose after index date. Dashed line represents a level of heterogeneity  $I^2 > 0.4$ .**

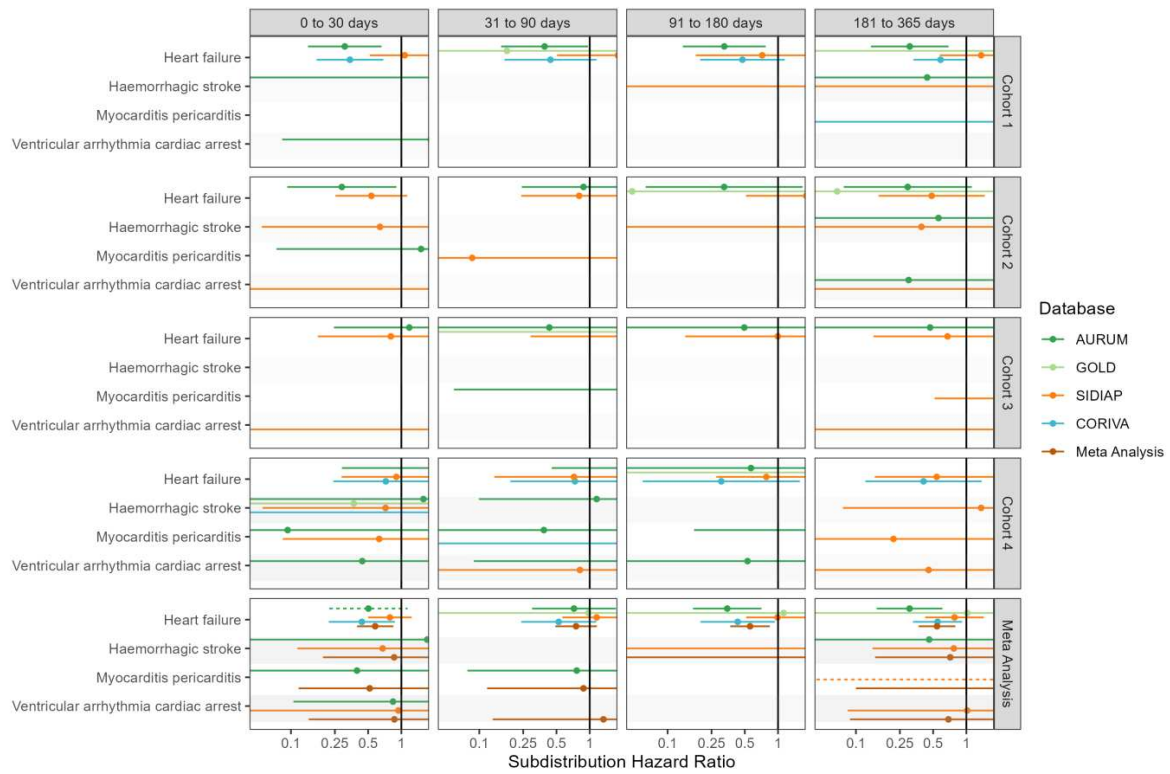

**Figure S40: Forest plots for vaccine effect (BNT162b2 vaccine) on preventing cardiac diseases and hemorrhagic stroke, for each cohort and database (meta-analysis estimates across cohorts in the last panel). Only first outcome after COVID-19 captured. Dashed line represents a level of heterogeneity  $I^2 > 0.4$ .**

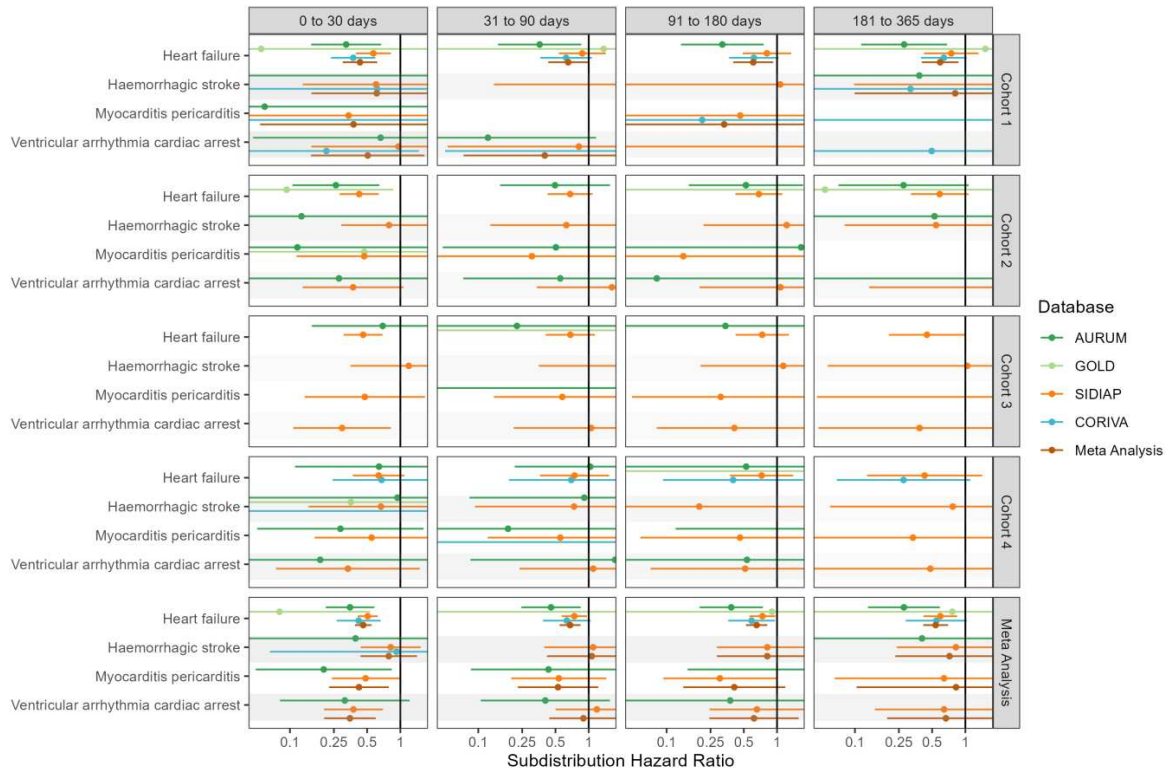

**Figure S41: Forest plots for comparative effect, meta-analysis across cohorts and databases. Follow-up ends at first vaccine dose after index date. Dashed line represents a level of heterogeneity  $I^2 > 0.4$ .**

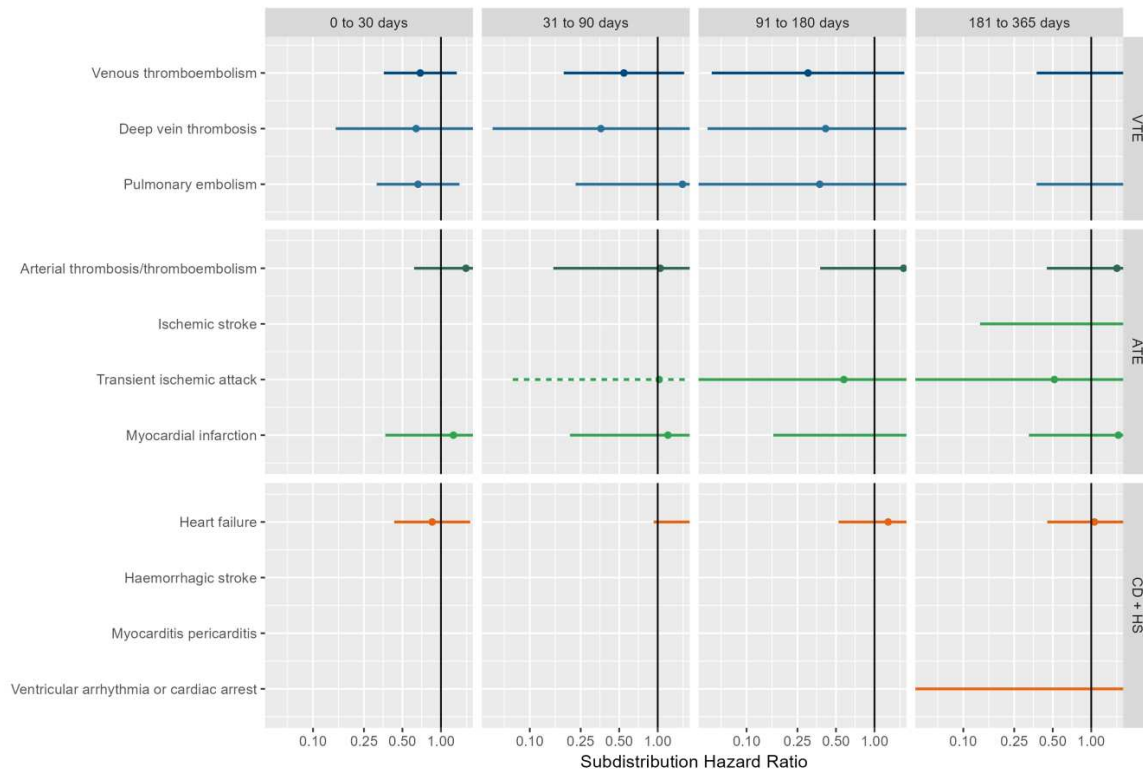

VTE = Venous thromboembolism, ATE = Arterial thrombosis/thromboembolism, CD + HS = Cardiac diseases and Hemorrhagic stroke

**Figure S42: Forest plots for comparative effect, meta-analysis across cohorts and databases. Only first outcome after COVID-19 captured. Dashed line represents a level of heterogeneity  $I^2 > 0.4$ .**

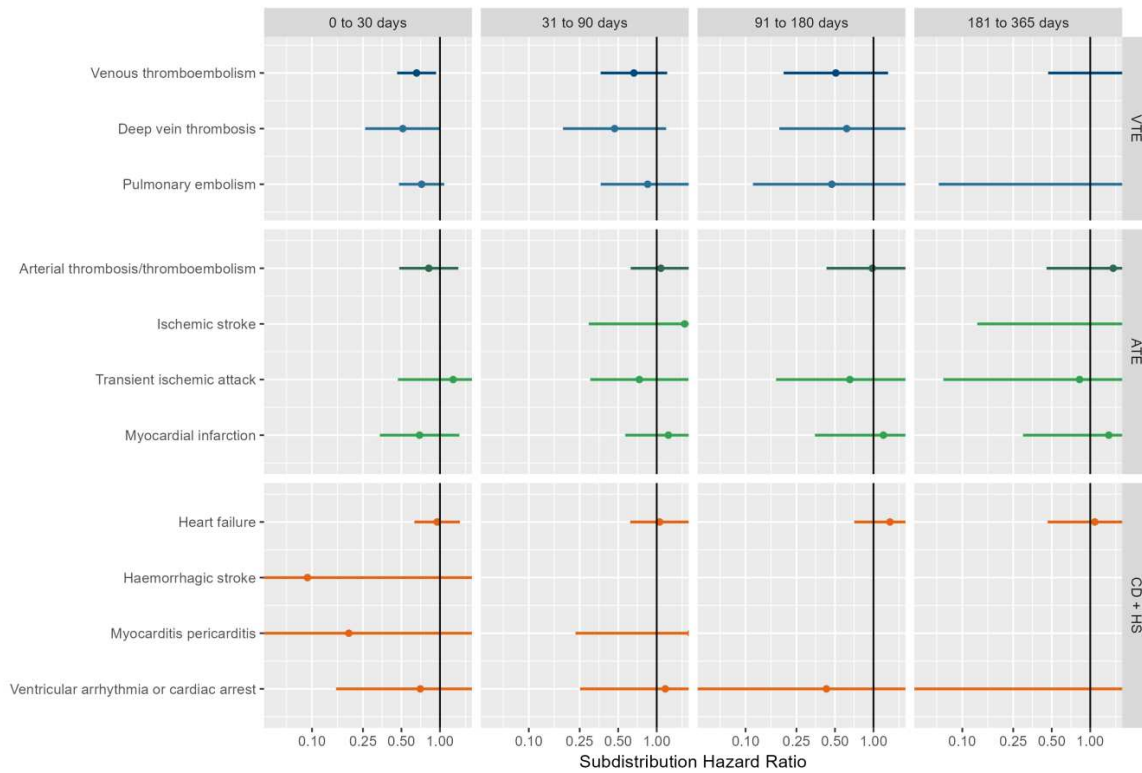

VTE = Venous thromboembolism, ATE = Arterial thrombosis/thromboembolism, CD + HS = Cardiac diseases and Hemorrhagic stroke



**Figure S43: Forest plots for comparative effect on preventing venous thromboembolism complications, for each cohort and database (meta-analysis estimates across cohorts in the last panel). Dashed line represents a level of heterogeneity  $I^2 > 0.4$ .**

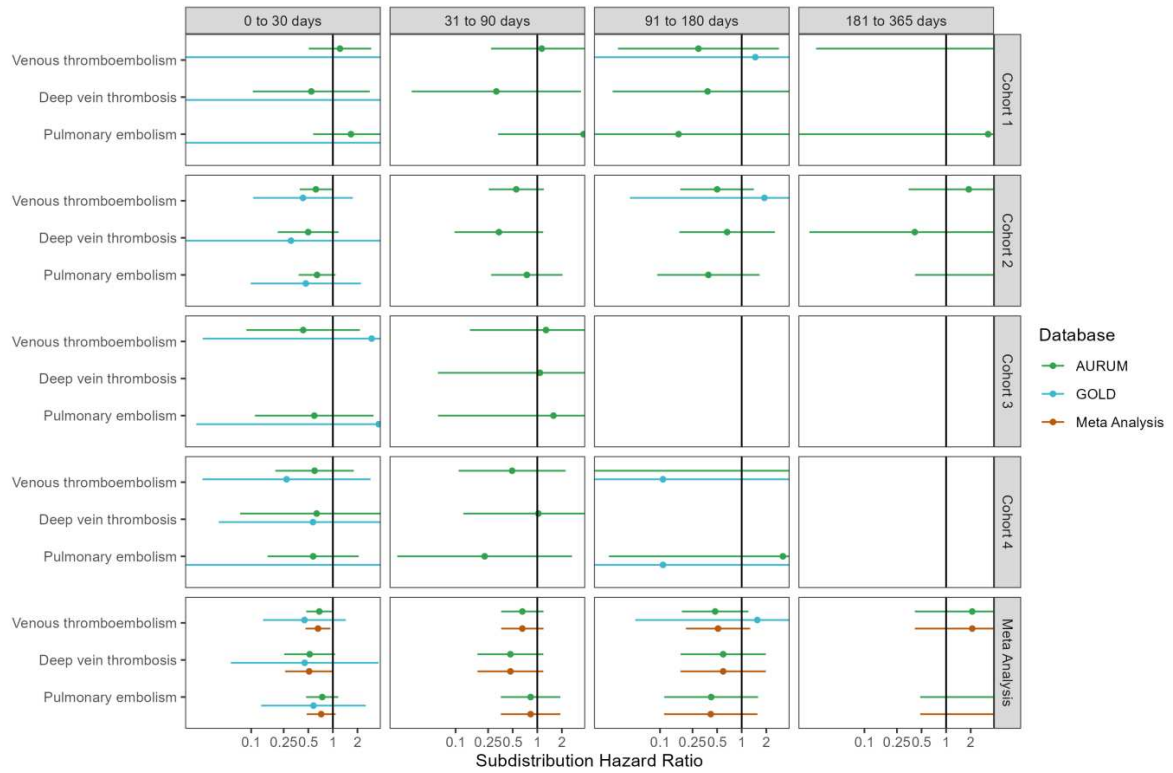

**Figure S44: Forest plots for comparative effect on preventing venous thromboembolism complications, for each cohort and database (meta-analysis estimates across cohorts in the last panel). Follow-up ends at first vaccine dose after index date. Dashed line represents a level of heterogeneity  $I^2 > 0.4$ .**

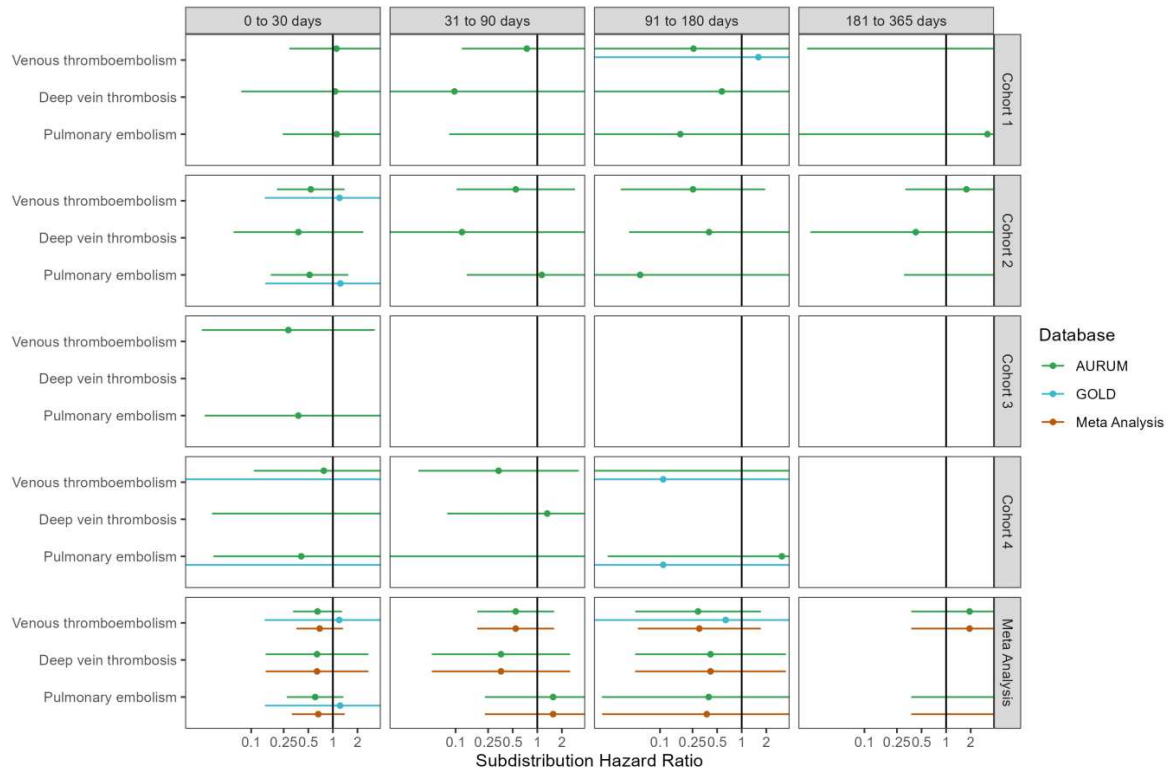

**Figure S45: Forest plots for comparative effect on preventing venous thromboembolism complications, for each cohort and database (meta-analysis estimates across cohorts in the last panel). Only first outcome after COVID-19 captured. Dashed line represents a level of heterogeneity  $I^2 > 0.4$ .**

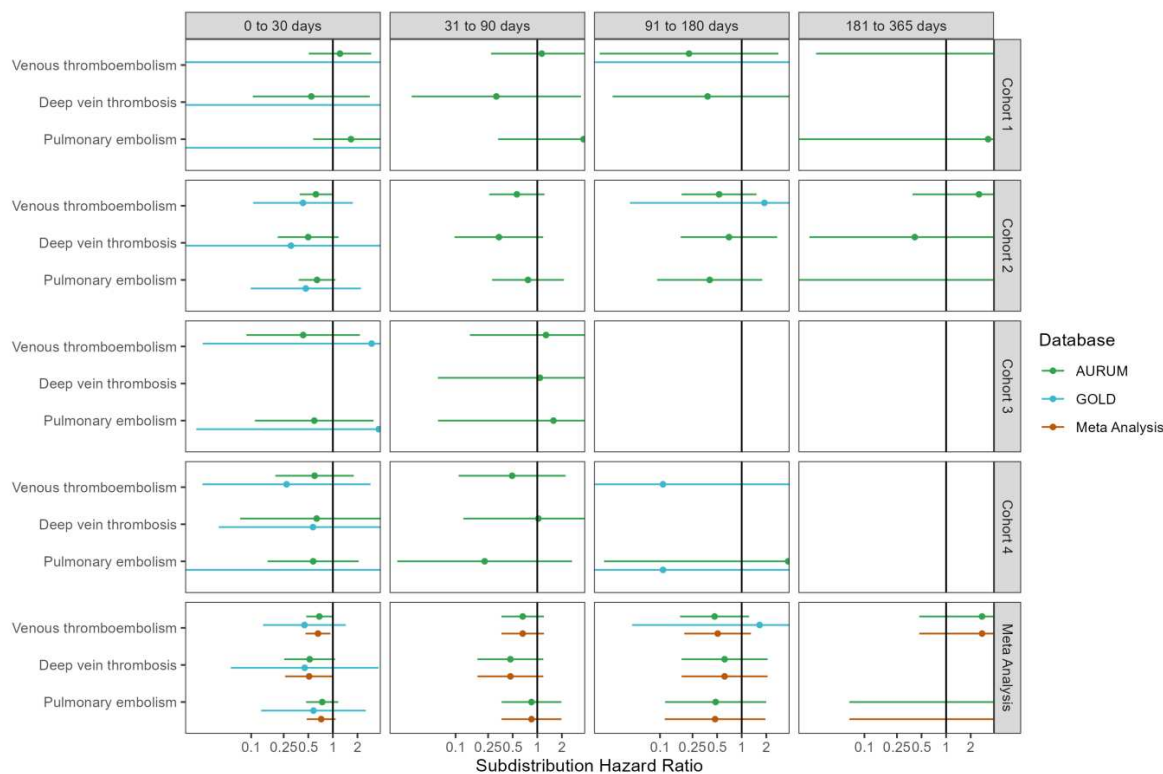

**Figure S46: Forest plots for comparative effect on preventing arterial thrombosis/thromboembolism complications, for each cohort and database (meta-analysis estimates across cohorts in the last panel).** Dashed line represents a level of heterogeneity  $I^2 > 0.4$ .

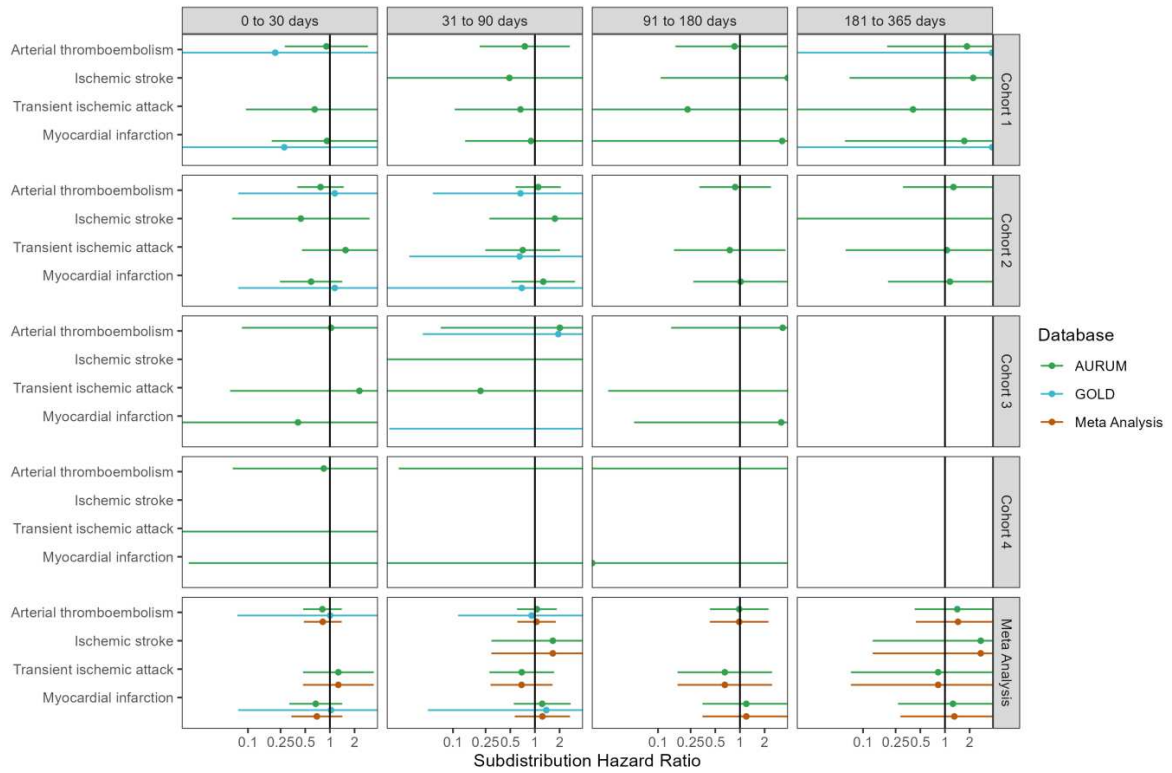

**Figure S47: Forest plots for comparative effect on preventing arterial thrombosis/thromboembolism complications, for each cohort and database (meta-analysis estimates across cohorts in the last panel). Follow-up ends at first vaccine dose after index date. Dashed line represents a level of heterogeneity  $I^2 > 0.4$ .**

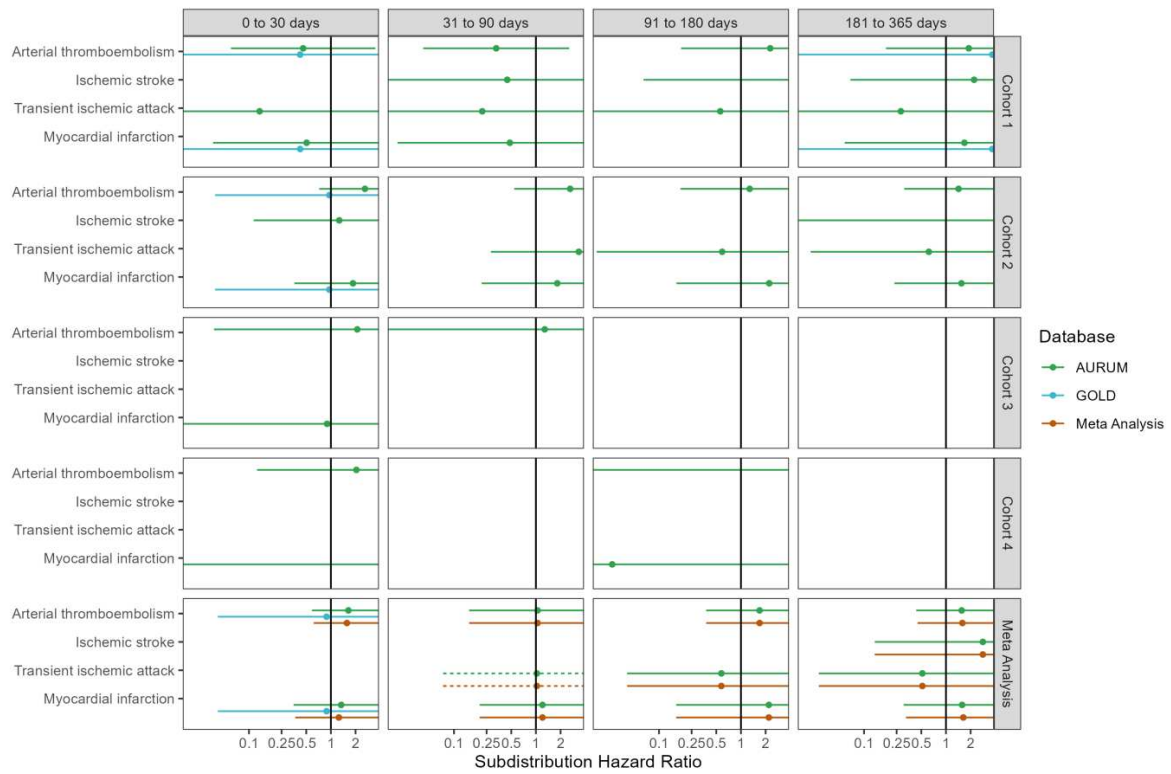

**Figure S48: Forest plots for comparative effect on preventing arterial thrombosis/thromboembolism complications, for each cohort and database (meta-analysis estimates across cohorts in the last panel). Only first outcome after COVID-19 captured. Dashed line represents a level of heterogeneity  $I^2 > 0.4$ .**

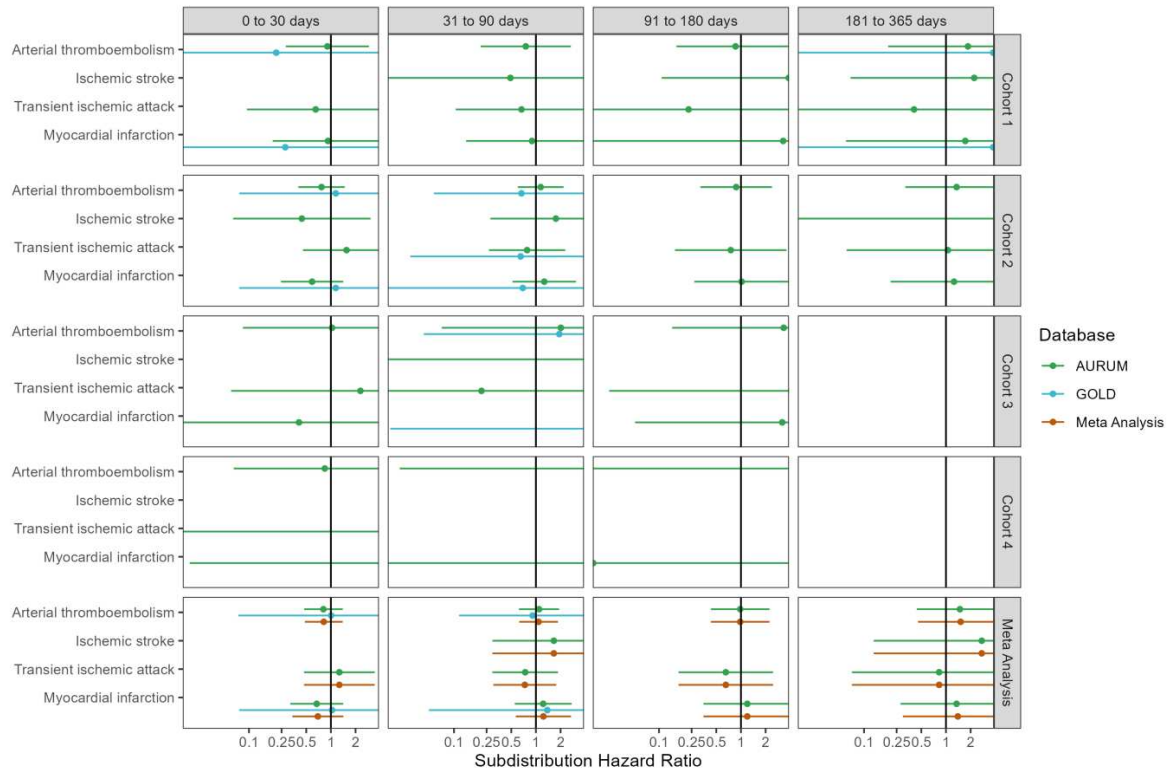

**Figure S49: Forest plots for comparative effect on preventing cardiac diseases and hemorrhagic stroke, for each cohort and database (meta-analysis estimates across cohorts in the last panel). Dashed line represents a level of heterogeneity  $I^2 > 0.4$ .**

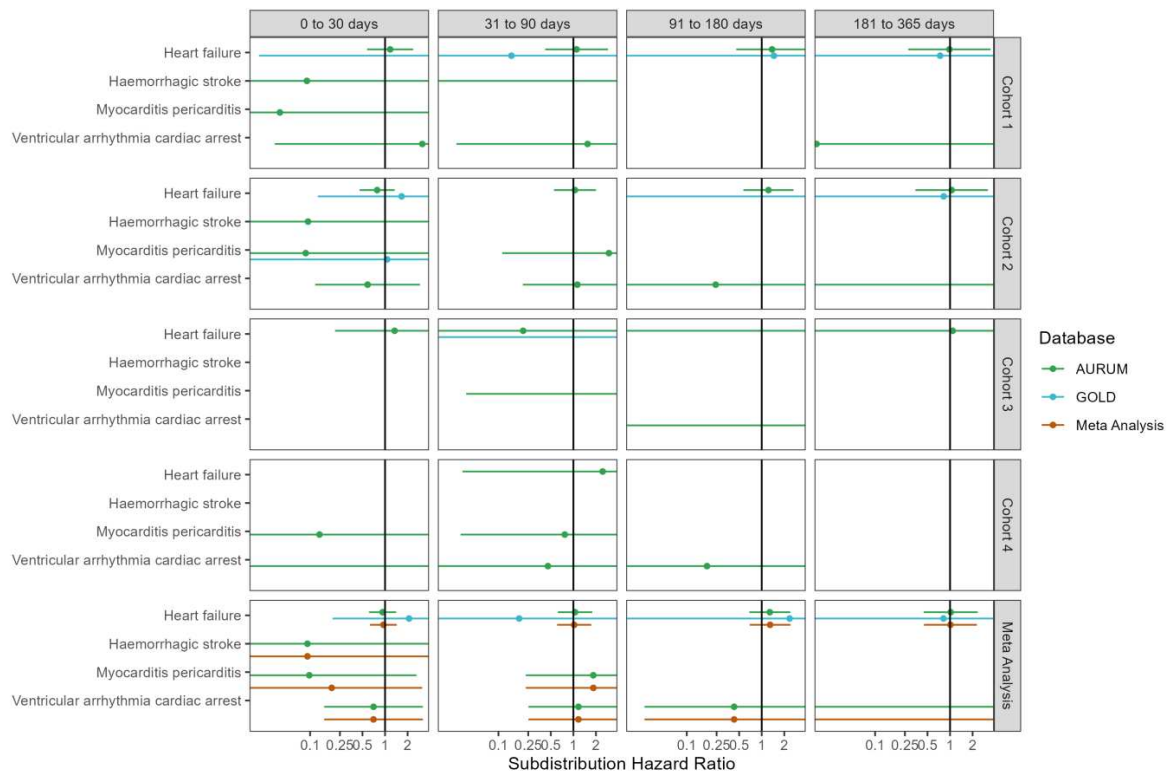

**Figure S50: Forest plots for comparative effect on preventing cardiac diseases and hemorrhagic stroke, for each cohort and database (meta-analysis estimates across cohorts in the last panel). Follow-up ends at first vaccine dose after index date. Dashed line represents a level of heterogeneity  $I^2 > 0.4$ .**

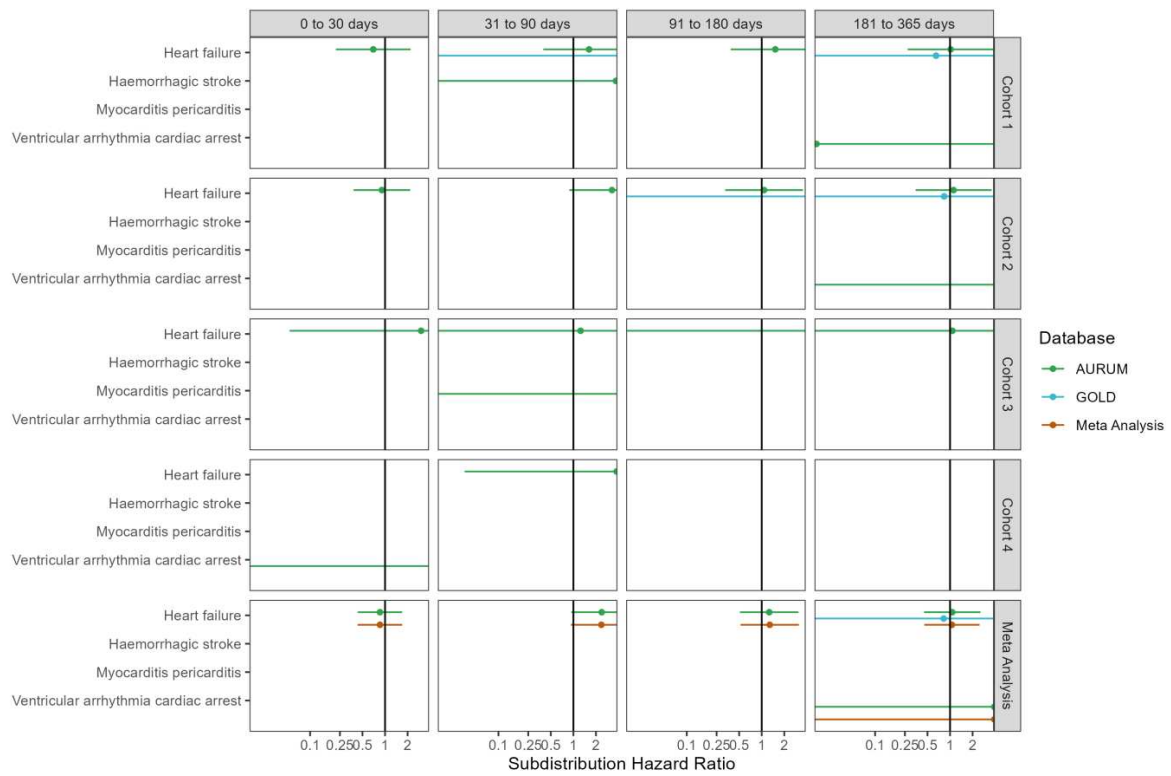



**Figure S51: Forest plots for comparative effect on preventing cardiac diseases and hemorrhagic stroke, for each cohort and database (meta-analysis estimates across cohorts in the last panel). Only first outcome after COVID-19 captured. Dashed line represents a level of heterogeneity  $I^2 > 0.4$ .**

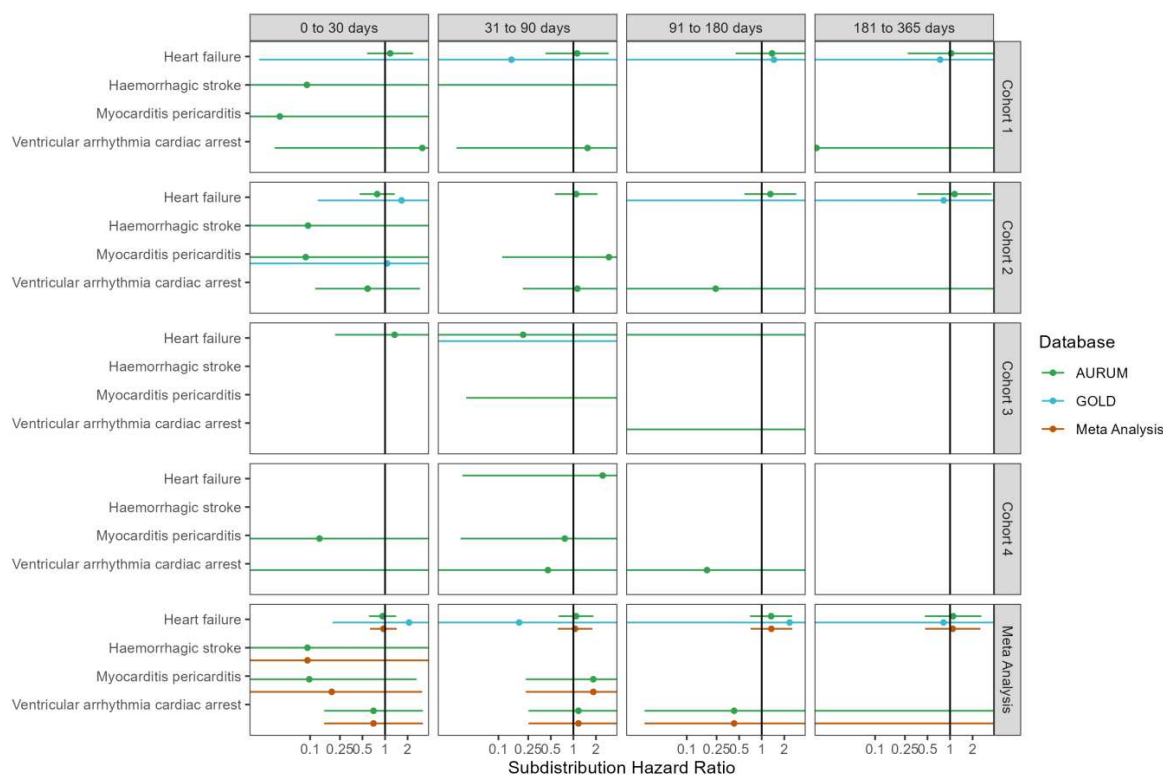

Supplement: heartjnl-2023-323483supp001_data_supplement.pdf [file heartjnl-2023-323483supp001_data_supplement.pdf]
